# Supplementary material for: Natural genetic variation in C. elegans identified genomic loci controlling metabolite levels
Source: Genome Res. 2018 Sep;28(9):1296–308. doi: 10.1101/gr.232322.117 (PMC6120624; doi:10.1101/gr.232322.117)
Supplement: Supplemental Material [file supp_gr.232322.117_Supplemental_Table_S1.xlsx]

## Sheet: Sheet 1
Supplemental Table S1:
A matrix of the genetic map of the strains used in this study.
The first column contains the marker names, followed by a column with the Chromosome and a column with the base-pair
position (WS258). The following columns contain the strains used in this study.
A ‘1’ denotes an N2 genotype, a ‘-1’ a CB4856 genotype.
name	Chromosome	Pos_WS258	CB4856	wn212	wn215	wn217	wn218	wn251	wn252	N2	wn001	wn002	wn003	wn004	wn005	wn006	wn007	wn008	wn009	wn010	wn011	wn012	wn013	wn014	wn015	wn016	wn017	wn018	wn019	wn020	wn021	wn022	wn023	wn024	wn025	wn026	wn027	wn028	wn029	wn030	wn031	wn032	wn033	wn034	wn035	wn036	wn037	wn038	wn039
binI10000	I	10000	-1	1	1	1	1	1	1	1	1	1	1	1	1	-1	-1	1	1	-1	1	1	-1	1	1	1	1	-1	1	-1	1	-1	-1	1	1	-1	1	-1	-1	1	1	1	1	1	-1	1	-1	-1	1
binI920000	I	919997	-1	1	1	1	1	1	1	1	1	1	1	1	1	-1	-1	1	1	-1	1	1	-1	1	1	1	1	-1	1	-1	1	1	-1	1	1	-1	1	-1	-1	1	1	1	1	1	-1	1	-1	-1	1
binI930000	I	929997	-1	1	1	1	1	1	1	1	1	1	1	1	1	-1	-1	1	1	-1	1	1	-1	1	1	1	1	-1	1	-1	1	1	-1	1	1	-1	1	-1	-1	1	1	1	1	1	-1	1	-1	-1	1
binI1040000	I	1039997	-1	1	1	1	1	1	1	1	1	1	1	1	1	-1	-1	1	1	-1	1	1	-1	1	1	1	1	-1	1	-1	1	1	-1	1	1	-1	1	-1	-1	1	1	1	1	1	-1	1	-1	-1	1
binI1050000	I	1049997	-1	1	1	1	1	1	1	1	1	1	1	1	1	-1	-1	1	1	-1	1	1	-1	1	1	1	1	-1	1	-1	1	1	-1	1	1	-1	1	-1	-1	1	1	1	1	1	-1	1	-1	-1	1
binI1120000	I	1119997	-1	1	1	1	1	1	1	1	1	1	1	1	1	-1	-1	1	1	-1	1	1	-1	1	1	1	1	-1	1	-1	1	1	-1	1	1	-1	1	-1	-1	1	1	1	1	1	-1	1	-1	-1	1
binI1130000	I	1129997	-1	1	1	1	1	1	1	1	1	1	1	1	1	-1	-1	1	1	-1	1	1	-1	1	1	1	1	-1	1	-1	1	1	-1	1	1	-1	1	-1	-1	1	1	1	1	1	-1	1	-1	1	1
binI1140000	I	1139997	-1	1	1	1	1	1	1	1	1	1	1	1	1	-1	-1	1	1	-1	1	1	-1	1	1	1	1	-1	1	-1	1	1	-1	1	1	-1	1	-1	-1	1	1	1	1	1	-1	1	-1	1	1
binI1150000	I	1149997	-1	1	1	1	1	1	1	1	1	1	1	1	1	-1	-1	1	1	-1	1	1	-1	1	1	1	1	-1	1	-1	1	1	-1	1	1	-1	1	-1	-1	1	1	1	1	1	-1	1	-1	1	1
binI1410000	I	1409998	-1	1	1	1	1	1	1	1	1	1	1	1	1	-1	-1	1	1	-1	1	1	-1	1	1	1	1	-1	1	-1	1	1	-1	1	1	-1	1	-1	-1	1	1	1	1	1	-1	1	-1	1	1
binI1420000	I	1419998	-1	1	1	1	1	1	1	1	1	1	1	1	1	-1	-1	1	1	-1	1	1	-1	1	1	1	1	-1	1	-1	1	1	-1	1	1	-1	1	-1	-1	1	1	1	1	1	-1	1	-1	1	1
binI1430000	I	1429998	-1	1	1	1	1	1	1	1	1	1	1	1	1	-1	-1	1	1	-1	1	1	-1	1	1	1	1	-1	1	-1	1	1	-1	1	1	-1	1	-1	-1	1	1	1	1	1	-1	1	-1	1	1
binI1510000	I	1509998	-1	1	1	1	1	1	1	1	1	1	1	1	1	1	1	1	1	1	1	1	-1	1	1	1	1	-1	1	-1	1	1	-1	1	1	1	1	-1	1	1	1	1	1	1	1	1	1	1	1
binI1520000	I	1519998	-1	1	1	1	1	1	1	1	1	1	1	1	1	1	1	1	1	1	1	1	-1	1	1	1	1	-1	1	-1	1	1	-1	1	1	1	1	-1	1	1	1	1	1	1	1	1	1	1	1
binI1540000	I	1539998	-1	1	1	1	1	1	1	1	1	1	1	1	1	1	1	1	1	1	1	1	-1	1	1	1	1	-1	1	-1	1	1	-1	1	1	1	1	-1	1	1	1	1	1	1	1	1	1	1	1
binI1550000	I	1549998	-1	1	1	1	1	1	1	1	1	1	1	1	1	1	1	1	1	1	1	1	-1	1	1	1	1	-1	1	-1	1	1	-1	1	1	1	1	-1	1	1	1	1	1	1	1	1	1	1	1
binI1560000	I	1559998	-1	1	1	1	1	1	1	1	1	1	1	1	1	1	1	1	1	1	1	1	-1	1	1	1	1	-1	1	-1	1	1	-1	1	1	1	1	-1	1	1	1	1	1	1	1	1	1	1	1
binI1580000	I	1579998	-1	1	1	1	1	1	1	1	1	1	1	1	1	1	1	1	1	1	1	1	-1	1	1	1	1	-1	1	-1	1	1	-1	1	1	1	1	-1	1	1	1	1	1	1	1	1	1	1	1
binI1590000	I	1589998	-1	1	1	1	1	1	1	1	1	1	1	1	1	1	1	1	1	1	1	1	-1	1	1	1	1	-1	1	-1	1	1	-1	1	1	1	1	-1	1	1	1	1	1	1	1	1	1	1	1
binI1740000	I	1739998	-1	1	1	1	1	1	1	1	1	1	1	1	1	1	1	1	1	1	1	1	-1	1	1	1	1	-1	1	-1	1	1	-1	1	1	1	1	-1	1	1	1	1	1	1	1	1	1	1	1
binI1750000	I	1749998	-1	1	1	1	1	1	1	1	1	1	1	1	1	1	1	1	1	1	1	1	-1	1	1	1	1	-1	1	1	1	1	-1	1	1	1	1	-1	1	1	1	1	1	1	1	1	1	1	1
binI1870000	I	1869998	-1	1	1	1	1	1	1	1	1	1	1	1	1	1	1	1	1	1	1	1	-1	1	1	1	1	-1	1	1	1	1	-1	1	1	1	1	-1	1	1	1	1	1	1	1	1	1	1	1
binI1880000	I	1879998	-1	1	1	1	1	1	1	1	1	1	1	1	1	1	1	1	1	1	1	1	-1	1	1	1	1	-1	1	1	1	1	-1	1	1	1	1	-1	1	1	1	1	1	1	1	1	1	1	1
binI1890000	I	1889998	-1	1	1	1	1	1	1	1	1	1	1	1	1	1	1	1	1	1	1	1	-1	1	1	1	1	-1	1	1	1	1	-1	1	1	1	1	-1	1	1	1	1	1	1	1	1	1	1	1
binI1940000	I	1939998	-1	1	1	1	1	1	1	1	1	1	1	1	1	1	1	1	1	1	1	1	-1	1	1	1	1	-1	1	1	1	1	-1	1	1	1	1	-1	1	1	1	1	1	1	1	1	1	1	1
binI1950000	I	1949998	-1	1	1	1	1	1	1	1	1	1	1	1	1	1	1	1	1	1	1	1	1	1	1	1	1	-1	1	1	1	1	-1	1	1	1	1	-1	1	1	1	1	1	1	1	1	1	1	1
binI2080000	I	2079997	-1	1	1	1	1	1	1	1	1	1	1	1	1	1	1	1	1	1	1	1	1	1	1	1	1	-1	1	1	1	1	-1	1	1	1	1	-1	1	1	1	1	1	1	1	1	1	1	1
binI2090000	I	2089997	-1	1	1	1	1	1	1	1	1	1	1	1	1	1	1	1	1	1	1	1	1	1	1	1	1	-1	1	1	1	1	-1	1	1	1	1	-1	1	1	1	1	1	1	1	1	1	1	1
binI2150000	I	2149997	-1	1	1	1	1	1	1	1	1	1	1	1	1	1	1	1	1	1	1	1	1	1	1	1	1	-1	1	1	1	1	-1	1	1	1	1	-1	1	1	1	1	1	1	1	1	1	1	1
binI2160000	I	2159997	-1	1	1	1	1	1	1	1	1	1	1	1	1	1	1	1	1	1	1	1	1	1	1	1	1	-1	1	1	1	1	-1	1	1	1	1	-1	1	1	1	1	1	1	1	1	1	1	1
binI2170000	I	2169998	-1	1	1	1	1	1	1	1	1	1	1	1	1	1	1	1	1	1	1	1	1	1	1	1	1	-1	1	1	1	1	-1	1	1	1	1	-1	1	1	1	1	1	1	1	1	1	1	1
binI2180000	I	2179998	-1	1	1	1	1	1	1	1	1	1	1	1	1	1	1	1	1	1	1	1	1	1	1	1	1	-1	1	1	1	1	-1	1	1	1	1	-1	1	1	1	1	1	1	1	1	1	1	1
binI2280000	I	2279998	-1	1	1	1	1	1	1	1	1	1	1	1	1	1	1	1	1	1	1	1	1	1	1	1	1	-1	1	1	1	1	-1	1	1	1	1	-1	1	1	1	1	1	1	1	1	1	1	1
binI2290000	I	2289998	-1	1	1	1	1	1	1	1	1	1	1	1	1	1	1	1	1	1	1	1	1	1	1	1	1	-1	1	1	1	1	-1	1	1	1	1	-1	1	1	1	1	1	1	1	1	1	1	1
binI2450000	I	2449998	-1	1	1	1	1	1	1	1	1	1	1	1	-1	1	1	1	1	1	1	1	1	1	1	1	1	1	1	1	1	1	-1	1	1	1	1	1	1	1	1	1	1	1	-1	1	-1	1	1
binI2460000	I	2459998	-1	1	1	1	1	1	1	1	1	1	1	1	-1	1	1	1	1	1	1	1	1	1	1	1	1	1	1	-1	1	1	-1	1	1	1	1	1	1	1	1	1	1	1	-1	1	-1	1	1
binI2470000	I	2469998	-1	1	1	1	1	1	1	1	1	1	1	1	-1	1	1	1	1	1	1	1	1	1	1	1	1	1	1	-1	1	1	-1	1	1	1	1	1	1	1	1	1	1	1	-1	1	-1	1	1
binI2480000	I	2479998	-1	1	1	1	1	1	1	1	1	1	1	1	-1	1	1	1	1	1	1	1	1	1	1	1	1	1	1	-1	1	1	-1	1	1	1	1	1	1	1	1	1	1	1	-1	1	-1	1	1
binI2490000	I	2489998	-1	1	1	1	1	1	1	1	1	1	1	1	-1	1	1	1	1	1	1	1	1	1	1	1	1	1	1	-1	1	1	-1	1	1	1	1	1	1	1	1	1	1	1	-1	1	-1	1	1
binI2510000	I	2509998	-1	1	1	1	1	1	1	1	1	1	1	1	-1	1	1	1	1	1	1	1	1	1	1	1	1	1	1	-1	1	1	-1	1	1	1	1	1	1	1	1	1	1	1	-1	1	-1	1	1
binI2520000	I	2519998	-1	1	1	1	1	1	1	1	1	1	1	1	-1	1	1	1	1	1	1	1	1	1	1	1	1	1	1	-1	1	1	-1	1	1	1	1	1	1	1	1	1	1	1	-1	1	-1	1	1
binI2530000	I	2529998	-1	1	1	1	1	1	1	1	1	1	1	1	-1	1	1	1	1	1	1	1	1	1	1	1	1	1	1	-1	1	1	-1	1	1	1	1	1	1	1	1	1	1	1	-1	1	-1	1	1
binI2540000	I	2539998	-1	1	1	1	1	1	1	1	1	1	1	1	-1	1	1	1	1	1	1	1	1	1	1	1	1	1	1	-1	1	1	-1	1	1	1	1	1	1	1	1	1	1	1	-1	1	-1	1	1
binI2600000	I	2599998	-1	1	1	1	1	1	1	1	1	1	1	1	-1	1	1	1	1	1	1	1	1	1	1	1	1	1	1	-1	1	1	-1	1	1	1	1	1	1	1	1	1	1	1	-1	1	-1	1	1
binI2610000	I	2609998	-1	1	1	1	1	1	1	1	1	1	1	1	-1	1	1	1	1	1	1	1	1	1	1	1	1	1	1	-1	1	1	-1	1	1	1	1	1	1	1	1	1	1	1	-1	1	-1	1	1
binI2750000	I	2749998	-1	1	1	1	1	1	1	1	1	1	1	1	-1	1	1	1	1	1	1	1	1	1	1	1	1	1	1	-1	1	1	-1	1	1	1	1	1	1	1	1	1	1	1	-1	1	-1	1	1
binI2760000	I	2759998	-1	1	1	1	1	1	1	1	1	1	1	1	-1	1	1	1	1	1	1	1	1	1	1	1	1	1	1	-1	1	1	-1	1	1	1	1	1	1	1	1	1	1	1	-1	1	-1	1	1
binI2770000	I	2769998	-1	1	1	1	1	1	1	1	1	1	1	1	-1	1	1	1	1	1	1	1	1	1	1	1	1	1	1	-1	1	1	-1	1	1	1	1	1	1	1	1	1	1	1	-1	1	-1	1	1
binI2830000	I	2829998	-1	1	1	1	1	1	1	1	1	1	1	1	-1	1	1	1	1	1	1	1	1	1	1	1	1	1	1	-1	1	1	-1	1	1	1	1	1	1	1	1	1	1	1	-1	1	-1	1	1
binI2840000	I	2839998	-1	1	1	1	1	1	1	1	1	1	1	1	-1	1	1	1	1	1	1	1	1	1	1	1	1	1	1	-1	-1	1	-1	1	1	1	1	1	1	1	1	1	1	1	-1	1	-1	1	1
binI2860000	I	2859998	-1	1	1	1	1	1	1	1	1	1	1	1	-1	1	1	1	1	1	1	1	1	1	1	1	1	1	1	-1	-1	1	-1	1	1	1	1	1	1	1	1	1	1	1	-1	1	-1	1	1
binI2870000	I	2869998	-1	1	1	1	1	1	1	1	1	1	1	1	-1	1	1	1	1	1	1	1	1	1	1	1	1	1	1	-1	-1	1	-1	1	1	1	1	1	1	1	1	1	1	1	-1	1	-1	1	1
binI2880000	I	2879998	-1	1	1	1	1	1	1	1	1	1	1	1	-1	1	1	1	1	1	1	1	1	1	1	1	1	1	1	-1	-1	1	-1	1	1	1	1	1	1	1	1	1	1	1	-1	1	-1	1	1
binI3010000	I	3009998	-1	1	1	1	1	1	1	1	1	1	1	1	-1	1	1	1	1	1	1	1	1	1	1	1	1	1	1	-1	-1	1	-1	1	1	1	1	1	1	1	1	1	1	1	-1	1	-1	1	1
binI3020000	I	3019998	-1	1	1	1	1	1	1	1	1	1	1	1	-1	1	1	1	1	1	1	1	1	1	1	1	1	1	1	-1	-1	1	-1	1	1	1	1	1	1	1	1	1	1	1	-1	1	-1	1	1
binI3030000	I	3029998	-1	1	1	1	1	1	1	1	1	1	1	1	-1	1	1	1	1	1	1	1	1	1	1	1	1	1	1	-1	-1	1	-1	1	1	1	1	1	1	1	1	1	1	1	-1	1	-1	1	1
binI3060000	I	3059998	-1	1	1	1	1	1	1	1	1	1	1	1	-1	1	1	1	1	1	1	1	1	1	1	1	1	1	1	-1	-1	1	-1	1	1	1	1	1	1	1	1	1	1	1	-1	1	-1	1	1
binI3070000	I	3069998	-1	1	1	1	1	1	1	1	1	1	1	1	-1	1	1	1	1	1	1	1	1	1	1	1	1	1	1	-1	-1	1	-1	1	1	1	1	1	1	1	1	1	1	1	-1	1	-1	-1	1
binI3080000	I	3079998	-1	1	1	1	1	1	1	1	1	1	1	1	-1	1	1	1	1	1	1	1	1	1	1	1	1	1	1	-1	-1	1	-1	1	1	1	1	1	1	1	1	1	1	1	-1	1	-1	-1	1
binI3090000	I	3089998	-1	1	1	1	1	1	1	1	1	1	1	1	-1	1	1	1	1	1	1	1	1	1	1	1	1	1	1	-1	-1	1	-1	1	1	1	1	1	1	1	1	1	1	1	-1	1	-1	-1	1
binI3220000	I	3219998	-1	1	1	1	1	1	1	1	1	1	1	1	-1	1	-1	1	1	1	1	-1	1	1	1	1	1	1	1	-1	-1	1	-1	1	1	1	1	1	1	1	1	1	1	1	-1	1	1	-1	1
binI3230000	I	3229998	-1	1	1	1	1	1	1	1	1	1	1	1	-1	1	-1	1	1	1	1	-1	1	1	1	1	1	1	1	-1	-1	1	-1	1	1	1	1	1	1	1	1	1	1	1	-1	1	1	-1	1
binI3290000	I	3289998	-1	1	1	1	1	1	1	1	1	1	1	1	-1	1	-1	1	1	1	1	-1	1	1	1	1	1	1	1	-1	-1	1	-1	1	1	1	1	1	1	1	1	1	1	1	-1	1	1	-1	1
binI3300000	I	3299998	-1	1	1	1	1	1	1	1	1	1	1	1	-1	1	-1	1	1	1	1	-1	1	1	1	1	1	1	1	-1	-1	1	-1	1	1	1	1	1	1	1	1	1	1	1	-1	1	1	-1	1
binI3390000	I	3389998	-1	1	1	1	1	1	1	1	1	1	1	1	-1	1	-1	1	1	1	1	-1	1	1	1	1	1	1	1	-1	-1	1	-1	1	1	1	1	1	1	1	1	1	1	1	-1	1	1	-1	1
binI3400000	I	3399998	-1	1	1	1	1	1	1	1	1	1	1	1	-1	1	-1	1	1	1	1	-1	1	1	1	1	1	1	1	-1	-1	1	-1	1	1	1	1	1	1	1	1	1	1	1	-1	1	1	-1	1
binI3520000	I	3519997	-1	1	1	1	1	1	1	1	1	1	1	1	-1	1	-1	1	1	1	1	-1	1	1	1	1	1	1	1	-1	-1	1	-1	1	1	1	1	1	1	1	1	1	1	1	-1	1	1	-1	1
binI3530000	I	3529997	-1	1	1	1	1	1	1	1	1	1	1	1	-1	1	-1	1	1	1	1	-1	1	1	1	1	1	1	1	-1	-1	1	-1	1	1	1	1	1	1	1	1	1	1	1	-1	1	1	-1	1
binI3580000	I	3579997	-1	1	1	1	1	1	1	1	1	1	1	1	-1	1	-1	1	1	1	1	-1	1	1	1	1	1	1	1	-1	-1	1	-1	1	1	1	1	1	1	1	1	1	1	1	-1	1	1	-1	1
binI3590000	I	3589997	-1	1	1	1	1	1	1	1	1	1	1	1	-1	1	-1	1	1	1	1	-1	1	1	1	1	1	1	1	-1	-1	1	-1	1	1	1	1	1	1	1	1	1	1	1	-1	1	1	-1	1
binI3640000	I	3639997	-1	1	1	1	1	1	1	1	1	1	1	1	-1	1	-1	1	1	1	1	-1	1	1	1	1	1	1	1	-1	-1	1	-1	1	1	1	1	1	1	1	1	1	1	1	-1	1	1	-1	1
binI3650000	I	3649997	-1	1	1	1	1	1	1	1	1	1	1	1	-1	1	-1	1	1	1	1	-1	1	1	1	1	1	1	1	-1	-1	1	-1	1	1	1	1	1	1	1	1	1	1	-1	-1	1	1	-1	1
binI6010000	I	6009998	-1	1	1	1	1	1	1	1	1	1	1	1	1	1	-1	1	1	1	1	-1	1	1	1	1	1	-1	1	-1	-1	-1	1	1	-1	-1	-1	1	1	1	1	1	1	-1	-1	1	1	-1	1
binI6020000	I	6019998	-1	1	1	1	1	1	1	1	1	1	1	1	1	1	-1	1	1	1	1	-1	1	1	1	1	1	-1	1	-1	-1	-1	1	1	-1	-1	-1	1	1	1	1	1	1	-1	-1	1	1	-1	1
binI6260000	I	6259998	-1	1	1	1	1	1	1	1	1	1	1	1	1	1	-1	1	1	1	1	-1	1	1	1	1	1	-1	1	-1	-1	-1	1	1	-1	-1	-1	1	1	1	1	1	1	-1	-1	1	1	-1	1
binI6270000	I	6269998	-1	1	1	1	1	1	1	1	1	1	1	1	1	1	-1	1	1	1	1	-1	1	1	1	1	1	-1	1	-1	-1	-1	1	1	-1	-1	-1	1	1	1	1	1	1	-1	-1	1	1	-1	1
binI7880000	I	7880005	-1	1	1	1	1	1	1	1	1	1	1	1	1	1	-1	1	1	1	1	1	1	1	1	1	1	-1	1	-1	-1	-1	1	1	-1	-1	-1	1	1	1	1	1	1	-1	-1	1	1	-1	1
binI7890000	I	7890005	-1	1	1	1	1	1	1	1	1	1	1	1	1	1	-1	1	1	1	1	1	1	1	1	1	1	-1	1	-1	-1	-1	1	1	-1	-1	-1	1	1	1	1	1	1	-1	-1	1	1	-1	1
binI8000000	I	8000005	-1	1	1	1	1	1	1	1	1	1	1	1	1	1	-1	1	1	1	1	1	1	1	1	1	1	-1	1	-1	-1	-1	1	1	-1	-1	-1	1	1	1	1	1	1	-1	-1	1	1	-1	1
binI8010000	I	8010005	-1	1	1	1	1	1	1	1	1	1	1	1	1	1	-1	1	1	1	1	1	1	1	1	1	1	-1	1	-1	-1	-1	1	1	-1	-1	-1	1	1	1	1	1	1	-1	-1	1	1	-1	1
binI9110000	I	9110007	-1	1	1	1	1	1	1	1	1	1	1	1	1	1	-1	1	1	1	1	1	1	1	1	1	1	-1	1	-1	-1	-1	1	1	-1	-1	-1	1	1	1	1	1	1	-1	-1	1	1	-1	1
binI9120000	I	9120007	-1	1	1	1	1	1	1	1	1	1	1	1	1	1	-1	1	1	1	1	-1	1	1	1	1	1	-1	1	-1	-1	-1	1	1	-1	-1	-1	1	1	1	1	1	1	-1	-1	1	1	-1	1
binI9130000	I	9130007	-1	-1	1	1	1	1	1	1	1	1	1	1	1	1	-1	1	1	1	1	-1	1	1	1	1	1	-1	1	-1	-1	-1	1	1	-1	-1	-1	1	1	1	1	1	1	-1	-1	1	1	-1	1
binI9140000	I	9140007	-1	-1	1	1	1	1	1	1	1	1	1	1	1	1	-1	1	1	1	1	-1	1	1	1	1	1	-1	1	-1	-1	-1	1	1	-1	-1	-1	1	1	1	1	1	1	-1	-1	1	1	-1	1
binI9290000	I	9290008	-1	-1	1	1	1	1	1	1	1	1	1	1	1	1	-1	1	1	1	1	-1	1	1	1	1	1	-1	1	-1	-1	-1	1	1	-1	-1	-1	1	1	1	1	1	1	-1	-1	1	1	-1	1
binI9300000	I	9300008	-1	-1	1	1	1	1	1	1	1	1	1	1	1	1	-1	1	1	1	1	-1	1	1	1	1	1	-1	1	-1	-1	-1	1	1	-1	-1	-1	1	1	1	1	1	1	-1	-1	1	1	-1	1
binI9670000	I	9670009	-1	-1	1	1	1	1	1	1	1	1	1	1	1	1	-1	1	1	1	1	-1	1	1	1	1	1	-1	1	-1	-1	-1	1	1	-1	-1	-1	1	1	1	1	1	1	-1	-1	1	1	-1	1
binI9680000	I	9680009	-1	-1	1	1	1	1	1	1	1	1	1	1	1	1	-1	1	1	1	1	-1	1	1	1	1	1	-1	1	-1	-1	-1	1	1	-1	-1	-1	1	1	1	1	1	1	-1	-1	1	1	-1	1
binI9810000	I	9810009	-1	-1	1	1	1	1	1	1	1	1	1	1	1	1	-1	1	1	1	1	-1	1	1	1	1	1	-1	1	-1	-1	-1	1	1	-1	-1	-1	1	1	1	1	1	1	-1	-1	1	1	-1	1
binI9820000	I	9820009	-1	-1	1	1	1	1	1	1	1	1	1	1	1	1	-1	1	1	1	1	-1	1	1	1	1	1	-1	1	-1	-1	-1	1	1	-1	-1	-1	1	1	1	1	1	1	-1	-1	1	1	-1	1
binI10510000	I	10510011	-1	-1	1	1	1	1	1	1	1	1	1	1	1	1	-1	1	1	1	1	-1	1	1	1	1	1	-1	1	-1	-1	-1	1	1	-1	-1	-1	1	1	1	1	1	1	-1	-1	1	1	-1	1
binI10520000	I	10520011	-1	-1	1	1	1	1	1	1	1	1	1	1	1	1	-1	1	1	1	1	-1	1	1	1	1	1	-1	1	-1	-1	-1	1	1	-1	-1	-1	1	1	1	1	1	1	-1	-1	1	1	-1	1
binI10850000	I	10850007	-1	-1	-1	1	1	1	1	1	1	1	1	1	1	1	-1	1	1	1	1	-1	1	1	1	1	1	-1	1	-1	-1	-1	1	1	-1	-1	-1	1	1	1	1	-1	1	-1	-1	1	1	-1	1
binI10860000	I	10860007	-1	-1	-1	1	1	1	1	1	1	1	1	1	1	1	-1	1	1	1	1	-1	1	1	1	1	1	-1	1	-1	-1	-1	1	1	-1	-1	-1	1	1	1	1	-1	1	-1	-1	1	1	-1	1
binI11030000	I	11030007	-1	-1	-1	1	1	1	1	1	1	1	1	1	1	1	-1	1	1	1	1	-1	1	1	1	1	1	-1	1	-1	-1	-1	1	1	-1	-1	-1	1	1	1	1	-1	1	-1	-1	1	1	-1	1
binI11040000	I	11040007	-1	-1	-1	1	1	1	1	1	1	1	1	1	1	1	-1	1	1	1	1	-1	1	1	1	1	1	-1	1	-1	-1	-1	1	1	-1	-1	-1	1	1	1	1	-1	1	-1	-1	1	1	-1	1
binI11290000	I	11290008	-1	-1	-1	1	1	1	1	1	1	1	1	1	1	1	-1	1	1	1	1	-1	1	1	1	1	1	-1	1	-1	-1	-1	1	1	-1	-1	-1	1	1	1	1	-1	1	-1	-1	1	1	-1	1
binI11300000	I	11300008	-1	-1	-1	1	1	1	1	1	1	1	1	1	1	1	-1	1	1	1	1	-1	1	1	1	1	1	-1	1	-1	-1	-1	1	1	-1	-1	-1	1	1	1	1	-1	1	-1	-1	1	1	-1	1
binI11360000	I	11360008	-1	-1	-1	1	1	1	1	1	1	1	1	1	1	1	-1	1	1	1	1	-1	1	1	1	1	1	-1	1	-1	-1	-1	1	1	-1	-1	-1	1	1	1	1	-1	1	-1	-1	1	1	-1	1
binI11370000	I	11370008	-1	-1	-1	1	1	1	1	1	1	1	1	1	1	1	-1	1	1	1	1	-1	1	1	1	1	1	-1	1	-1	-1	-1	1	1	-1	-1	-1	1	1	1	1	-1	1	-1	-1	1	1	-1	1
binI11560000	I	11560009	-1	-1	-1	1	1	1	1	1	1	1	1	1	1	1	-1	1	1	1	1	-1	1	1	1	1	1	-1	1	-1	-1	-1	1	1	-1	-1	-1	1	1	1	1	-1	1	-1	-1	1	1	-1	1
binI11570000	I	11570009	-1	-1	-1	1	1	1	1	1	1	1	1	1	1	1	-1	1	1	1	1	-1	1	1	1	1	1	-1	1	-1	-1	-1	1	1	-1	-1	-1	1	1	1	1	-1	1	-1	-1	1	1	-1	1
binI11780000	I	11780009	-1	-1	-1	1	1	1	1	1	1	1	1	1	1	1	-1	1	1	1	1	-1	1	1	1	1	1	-1	1	-1	-1	-1	1	1	-1	-1	-1	1	1	1	1	-1	1	-1	-1	1	1	-1	1
binI11790000	I	11790009	-1	-1	-1	1	1	1	1	1	1	1	1	1	1	1	-1	1	1	1	1	-1	1	1	1	1	1	-1	1	-1	-1	-1	1	1	-1	-1	-1	1	1	1	1	-1	1	-1	-1	1	1	-1	1
binI11970000	I	11970009	-1	-1	-1	1	1	1	1	1	1	1	1	1	1	1	-1	1	1	1	1	-1	1	1	1	1	1	-1	1	-1	-1	-1	1	1	-1	-1	-1	1	1	1	1	-1	1	-1	-1	1	1	-1	1
binI11980000	I	11980009	-1	-1	-1	1	1	1	1	1	1	1	1	1	1	1	-1	1	1	1	1	-1	1	1	1	1	1	-1	1	-1	-1	-1	1	1	-1	-1	-1	1	1	1	1	-1	1	-1	-1	1	1	-1	1
binI12180000	I	12180009	-1	-1	-1	1	1	1	1	1	1	1	1	1	1	1	-1	1	1	1	1	-1	1	1	1	1	1	-1	1	-1	-1	-1	1	1	-1	-1	-1	1	1	1	1	-1	1	-1	-1	1	1	-1	1
binI12190000	I	12190009	-1	-1	-1	1	1	1	1	1	1	1	1	1	1	1	-1	1	1	1	1	-1	1	1	1	1	1	-1	1	-1	-1	-1	1	1	-1	-1	-1	1	1	1	1	-1	1	-1	-1	1	1	-1	1
binI12410000	I	12410010	-1	-1	-1	1	1	1	1	1	1	1	1	1	1	1	-1	1	1	1	1	-1	1	1	1	1	-1	-1	1	-1	-1	-1	1	1	-1	-1	-1	1	1	1	1	-1	1	-1	1	1	1	-1	1
binI12420000	I	12420010	-1	-1	-1	-1	1	1	1	1	1	1	1	1	1	1	-1	1	1	1	1	-1	1	1	1	1	-1	-1	1	-1	-1	-1	1	1	-1	-1	-1	1	1	1	1	-1	1	-1	1	1	1	-1	1
binI12560000	I	12560010	-1	-1	-1	-1	1	1	1	1	1	1	1	1	1	1	-1	1	1	1	1	-1	1	1	1	1	-1	-1	1	-1	-1	-1	1	1	-1	-1	-1	1	1	1	1	-1	1	-1	1	1	1	-1	1
binI12570000	I	12570010	-1	-1	-1	-1	1	1	1	1	1	1	1	1	1	1	-1	1	1	1	1	-1	1	1	1	1	-1	-1	1	-1	-1	-1	1	1	-1	-1	-1	1	1	1	1	-1	1	-1	1	1	1	-1	1
binI12700000	I	12700010	-1	-1	-1	-1	1	1	1	1	1	1	1	1	1	1	-1	1	1	1	1	-1	1	1	1	1	-1	-1	1	-1	-1	-1	1	1	-1	-1	-1	1	1	1	1	-1	1	-1	1	1	1	-1	1
binI12710000	I	12710010	-1	-1	-1	-1	1	1	1	1	1	1	1	1	1	1	-1	1	1	1	1	-1	1	1	1	1	-1	-1	1	-1	-1	-1	1	1	-1	-1	-1	1	1	1	1	-1	1	-1	1	1	1	-1	1
binI13850000	I	13850012	-1	-1	-1	-1	-1	1	1	1	1	1	1	-1	1	1	-1	1	1	1	1	-1	1	1	-1	1	-1	-1	1	-1	-1	-1	1	1	-1	-1	-1	1	1	1	1	-1	1	-1	1	1	1	-1	1
binI13860000	I	13860012	-1	-1	-1	-1	-1	1	1	1	1	1	1	-1	1	1	-1	1	1	1	1	-1	1	1	-1	1	-1	-1	1	-1	-1	-1	1	1	-1	-1	-1	1	1	1	1	-1	1	-1	1	1	1	-1	1
binI13870000	I	13870012	-1	-1	-1	-1	-1	1	1	1	1	1	1	-1	1	1	-1	1	1	1	1	-1	1	1	-1	1	-1	-1	1	-1	-1	-1	1	1	-1	-1	-1	1	1	1	1	-1	1	-1	1	1	1	-1	1
binI13880000	I	13880012	-1	-1	-1	-1	-1	1	1	1	1	1	1	-1	1	1	-1	1	1	1	1	-1	1	1	-1	1	-1	-1	1	-1	-1	-1	1	1	-1	-1	-1	1	1	1	1	-1	1	-1	1	1	1	-1	1
binI14660000	I	14660011	-1	-1	-1	-1	-1	1	1	1	1	1	1	-1	1	1	-1	1	1	1	1	-1	1	1	-1	1	-1	1	1	-1	-1	-1	1	1	-1	-1	-1	1	1	1	1	-1	1	-1	1	1	1	-1	1
binI14670000	I	14670011	-1	-1	-1	-1	-1	1	1	1	1	1	1	-1	1	1	-1	1	1	1	1	-1	1	1	-1	1	-1	1	1	-1	-1	-1	1	1	-1	-1	-1	1	1	1	1	-1	1	-1	1	1	1	-1	1
binI14680000	I	14680011	-1	-1	-1	-1	-1	1	1	1	1	1	1	-1	1	1	-1	1	1	1	1	-1	1	1	-1	1	-1	1	1	-1	-1	-1	1	1	-1	-1	-1	1	1	1	1	-1	1	-1	1	1	1	-1	1
binI14690000	I	14690011	-1	-1	-1	-1	-1	1	1	1	1	1	1	-1	1	1	-1	1	1	1	1	-1	1	1	-1	1	-1	1	1	-1	-1	-1	1	1	-1	-1	-1	1	1	1	1	-1	1	-1	1	1	1	-1	1
binI14820000	I	14820011	-1	-1	-1	-1	-1	1	1	1	1	1	1	-1	1	1	-1	1	1	1	1	-1	1	1	-1	1	-1	1	1	-1	-1	-1	1	1	-1	-1	-1	1	1	1	1	-1	1	-1	1	1	1	-1	1
binI14830000	I	14830011	-1	-1	-1	-1	-1	1	1	1	1	1	1	-1	1	1	-1	1	1	1	1	-1	1	1	-1	1	-1	1	1	-1	-1	-1	1	1	-1	-1	-1	1	1	1	1	-1	1	1	1	1	1	-1	1
binI15072423	I	15072434	-1	-1	-1	-1	-1	1	1	1	1	1	1	-1	1	1	-1	1	1	1	1	-1	1	1	-1	1	-1	1	1	-1	-1	-1	1	1	-1	-1	-1	1	1	1	1	-1	1	1	1	1	1	-1	1
binII10000	II	10000	-1	1	1	1	1	1	1	1	-1	1	-1	-1	-1	1	-1	-1	1	-1	-1	1	-1	-1	1	-1	1	1	-1	1	-1	-1	-1	-1	1	-1	1	1	1	1	1	1	-1	1	-1	-1	-1	-1	-1
binII690000	II	689993	-1	1	1	1	1	1	1	1	-1	1	-1	-1	-1	1	-1	-1	1	-1	-1	1	-1	-1	1	-1	1	1	-1	1	-1	-1	-1	-1	1	-1	1	1	1	1	1	1	-1	1	-1	-1	-1	-1	-1
binII700000	II	699993	-1	1	1	1	1	1	1	1	-1	1	-1	-1	-1	1	-1	-1	1	-1	-1	1	-1	-1	1	-1	1	1	-1	1	-1	-1	-1	-1	1	-1	1	1	1	1	1	1	-1	1	-1	-1	-1	-1	-1
binII1300000	II	1299993	-1	1	1	1	1	1	1	1	-1	1	-1	-1	-1	1	-1	-1	1	-1	-1	1	-1	-1	1	-1	1	1	-1	1	-1	-1	-1	-1	1	-1	1	1	1	1	1	1	-1	1	-1	-1	-1	-1	-1
binII1310000	II	1309993	-1	1	1	1	1	1	1	1	-1	1	-1	-1	-1	1	-1	-1	1	-1	-1	1	-1	-1	1	-1	1	1	-1	1	-1	-1	-1	-1	1	-1	1	1	1	1	1	1	-1	1	-1	-1	-1	-1	-1
binII1670000	II	1669994	-1	1	1	1	1	1	1	1	-1	1	-1	-1	-1	1	-1	1	1	-1	-1	1	-1	-1	1	-1	1	1	-1	1	-1	-1	-1	-1	1	-1	1	1	1	1	1	1	-1	1	-1	-1	-1	-1	-1
binII1680000	II	1679994	-1	1	1	1	1	1	1	1	-1	1	-1	-1	-1	1	-1	1	1	-1	-1	1	-1	-1	1	-1	1	1	-1	1	-1	-1	-1	-1	1	-1	1	1	1	1	1	1	-1	1	-1	-1	-1	-1	-1
binII2200000	II	2199995	-1	1	1	1	1	1	1	1	-1	1	-1	-1	-1	1	-1	1	1	-1	-1	1	-1	-1	1	-1	1	1	-1	1	-1	-1	-1	-1	1	-1	1	1	1	1	1	1	-1	1	-1	-1	-1	-1	-1
binII2210000	II	2209995	-1	1	1	1	1	1	1	1	-1	1	-1	-1	-1	1	-1	1	1	-1	-1	1	-1	-1	1	-1	1	1	-1	1	-1	-1	-1	-1	1	-1	1	1	1	1	1	1	-1	1	-1	-1	-1	-1	-1
binII2470000	II	2469995	-1	1	1	1	1	1	1	1	-1	1	-1	1	-1	1	-1	1	1	-1	-1	1	-1	-1	1	-1	1	-1	-1	1	-1	-1	-1	-1	1	-1	1	1	1	1	1	1	-1	1	-1	-1	-1	-1	-1
binII2480000	II	2479995	-1	1	1	1	1	1	1	1	-1	1	-1	1	-1	1	-1	1	1	-1	-1	1	-1	-1	1	-1	1	-1	-1	1	-1	-1	-1	-1	1	-1	1	1	1	1	1	1	-1	1	-1	-1	-1	-1	-1
binII2530000	II	2529995	-1	1	1	1	1	1	1	1	-1	1	-1	1	-1	1	-1	1	1	-1	-1	1	-1	-1	1	-1	1	-1	-1	1	-1	-1	-1	-1	1	-1	1	1	1	1	1	1	-1	1	-1	-1	-1	-1	-1
binII2540000	II	2539995	-1	1	1	1	1	1	1	1	-1	1	-1	1	-1	1	-1	1	1	-1	-1	1	-1	-1	1	-1	1	-1	-1	1	1	-1	-1	-1	1	-1	1	1	1	1	1	1	-1	1	-1	-1	-1	-1	-1
binII2620000	II	2619995	-1	1	1	1	1	1	1	1	-1	1	-1	1	-1	1	-1	1	1	-1	-1	1	-1	-1	1	-1	1	-1	-1	1	1	-1	-1	-1	1	-1	1	1	1	1	1	1	-1	1	-1	-1	-1	-1	-1
binII2630000	II	2629995	-1	1	1	1	1	1	1	1	-1	1	-1	1	-1	1	-1	1	1	-1	-1	1	-1	-1	1	-1	1	-1	-1	1	1	-1	-1	-1	1	-1	1	1	1	1	1	1	-1	1	-1	-1	-1	1	-1
binII2640000	II	2639995	-1	1	1	1	1	1	1	1	-1	1	-1	1	-1	1	-1	1	1	-1	-1	1	-1	-1	1	-1	1	-1	-1	1	1	-1	-1	-1	1	-1	1	1	1	1	1	1	-1	1	-1	-1	-1	1	-1
binII2760000	II	2759995	-1	1	1	1	1	1	1	1	-1	1	-1	1	-1	1	-1	1	1	-1	-1	1	-1	-1	1	-1	1	-1	-1	1	1	-1	-1	-1	1	-1	1	1	1	1	1	1	-1	1	-1	-1	-1	1	-1
binII2770000	II	2769995	-1	1	1	1	1	1	1	1	-1	1	-1	1	-1	1	-1	1	1	-1	-1	1	-1	-1	1	-1	1	-1	-1	1	1	-1	-1	-1	1	-1	1	1	1	1	1	1	-1	1	-1	-1	-1	1	-1
binII2830000	II	2829995	-1	1	1	1	1	1	1	1	-1	1	-1	1	-1	1	-1	1	1	-1	-1	1	-1	-1	1	-1	1	-1	-1	1	1	-1	-1	-1	1	-1	1	1	1	1	1	1	-1	1	-1	-1	-1	1	-1
binII2840000	II	2839995	-1	1	1	1	1	1	1	1	-1	1	-1	1	-1	1	-1	1	1	-1	-1	1	-1	-1	1	-1	1	-1	-1	1	1	-1	-1	-1	1	-1	1	1	1	1	1	1	-1	1	-1	-1	-1	1	-1
binII2860000	II	2859995	-1	1	1	1	1	1	1	1	-1	1	-1	1	-1	1	-1	1	1	-1	-1	1	-1	-1	1	-1	1	-1	-1	1	1	-1	-1	-1	1	-1	1	1	1	1	1	1	-1	1	-1	-1	-1	1	-1
binII2870000	II	2869995	-1	1	1	1	1	1	1	1	-1	1	-1	1	-1	1	-1	1	1	-1	-1	1	-1	-1	1	-1	1	-1	-1	1	1	-1	-1	-1	1	-1	1	1	1	1	1	1	-1	1	-1	-1	-1	1	-1
binII2880000	II	2879996	-1	1	1	1	1	1	1	1	-1	1	-1	1	-1	1	-1	1	1	-1	-1	1	-1	-1	1	-1	1	-1	-1	1	1	-1	-1	-1	1	-1	1	1	1	1	1	1	-1	1	-1	-1	-1	1	-1
binII3240000	II	3239997	-1	1	1	1	1	1	1	1	-1	1	-1	1	-1	1	-1	1	1	-1	-1	1	-1	-1	1	-1	1	-1	1	1	1	-1	-1	-1	1	-1	1	1	1	1	1	-1	-1	1	-1	-1	1	1	-1
binII3250000	II	3249996	-1	1	1	1	1	1	1	1	-1	1	-1	1	-1	1	-1	1	1	-1	-1	1	-1	-1	1	-1	1	-1	1	1	1	-1	-1	-1	1	-1	1	1	1	1	1	-1	-1	1	-1	-1	1	1	-1
binII3280000	II	3279996	-1	1	1	1	1	1	1	1	-1	1	-1	1	-1	1	-1	1	1	-1	-1	1	-1	-1	1	-1	1	-1	1	1	1	-1	-1	-1	1	-1	1	1	1	1	1	-1	-1	1	-1	-1	1	1	-1
binII3290000	II	3289996	-1	1	1	1	1	1	1	1	-1	1	-1	1	-1	1	-1	1	1	-1	-1	1	-1	-1	1	-1	1	-1	1	1	1	-1	-1	-1	1	-1	1	1	1	1	1	-1	-1	1	-1	-1	1	1	-1
binII3480000	II	3479997	-1	1	1	1	1	1	1	1	-1	1	-1	1	-1	1	-1	1	1	-1	-1	1	-1	-1	1	-1	1	-1	1	1	1	-1	-1	-1	1	-1	1	1	1	1	1	-1	-1	1	-1	-1	1	1	-1
binII3490000	II	3489997	-1	1	1	1	1	1	1	1	-1	1	-1	1	-1	1	-1	1	1	-1	-1	1	-1	-1	1	-1	1	-1	1	1	1	-1	-1	-1	1	-1	1	1	1	1	1	-1	-1	1	-1	-1	1	1	-1
binII3580000	II	3579997	-1	1	1	1	1	1	1	1	-1	1	-1	1	-1	1	-1	1	1	-1	-1	1	-1	-1	1	-1	1	-1	1	1	1	-1	-1	-1	1	-1	1	1	1	1	1	-1	-1	1	-1	-1	1	1	-1
binII3590000	II	3589997	-1	1	1	1	1	1	1	1	-1	1	-1	1	-1	1	-1	1	1	-1	-1	1	-1	-1	1	-1	1	-1	1	1	1	-1	-1	-1	1	-1	1	1	1	1	1	-1	-1	1	-1	-1	1	1	-1
binII3880000	II	3879998	-1	1	1	1	1	1	1	1	-1	1	-1	1	-1	1	-1	-1	1	-1	-1	1	-1	-1	1	-1	1	-1	1	1	1	-1	-1	-1	1	-1	1	1	1	1	1	-1	-1	1	-1	-1	1	1	-1
binII3890000	II	3889998	-1	1	1	1	1	1	1	1	-1	1	-1	1	-1	1	-1	-1	1	-1	-1	1	-1	-1	1	-1	1	-1	1	1	1	-1	-1	-1	1	-1	1	1	1	1	1	-1	-1	1	-1	-1	1	1	-1
binII4560000	II	4560003	-1	1	1	1	1	1	1	1	-1	1	-1	1	1	1	-1	-1	1	-1	-1	1	-1	-1	1	-1	1	-1	1	1	1	-1	-1	-1	1	-1	1	1	1	1	1	-1	-1	1	-1	-1	1	1	-1
binII4570000	II	4570003	-1	1	1	1	1	1	1	1	-1	1	-1	1	1	1	-1	-1	1	-1	-1	1	-1	-1	1	-1	1	-1	1	1	1	-1	-1	-1	1	-1	1	1	1	1	1	-1	-1	1	-1	-1	1	1	-1
binII5020000	II	5020007	-1	1	1	1	1	1	1	1	-1	1	-1	1	1	1	-1	-1	1	-1	-1	1	-1	-1	1	-1	1	-1	1	1	1	-1	-1	-1	1	-1	1	1	1	1	1	-1	-1	1	-1	-1	1	1	-1
binII5030000	II	5030008	-1	1	1	1	1	1	1	1	-1	1	-1	1	1	1	-1	-1	1	-1	-1	1	-1	-1	1	-1	1	-1	1	1	1	-1	-1	-1	1	-1	1	1	1	1	1	-1	-1	1	-1	-1	1	1	-1
binII5400000	II	5400017	-1	1	1	1	1	1	1	1	-1	1	-1	1	-1	1	-1	-1	1	-1	-1	1	-1	-1	1	-1	1	-1	1	1	1	-1	-1	-1	1	-1	1	1	1	1	1	-1	-1	1	-1	-1	1	1	-1
binII5410000	II	5410017	-1	1	1	1	1	1	1	1	-1	1	-1	1	-1	1	-1	-1	1	-1	-1	1	-1	-1	1	-1	1	-1	1	1	1	-1	-1	-1	1	-1	1	1	1	1	1	-1	-1	1	-1	-1	1	1	-1
binII5580000	II	5580017	-1	1	1	1	1	1	1	1	-1	1	-1	1	-1	1	-1	-1	1	-1	-1	1	-1	-1	1	-1	1	-1	1	1	1	-1	-1	-1	1	-1	1	1	1	1	1	-1	-1	1	-1	-1	1	1	-1
binII5590000	II	5590017	-1	1	1	1	1	1	1	1	-1	1	-1	1	-1	1	-1	-1	1	-1	-1	1	-1	-1	1	-1	1	-1	1	1	1	-1	-1	-1	1	-1	1	1	1	1	1	-1	-1	1	-1	-1	1	1	-1
binII5650000	II	5650018	-1	1	1	1	1	1	1	1	-1	1	-1	1	-1	1	-1	-1	1	-1	-1	1	-1	-1	1	-1	1	-1	1	1	1	-1	-1	-1	1	-1	1	1	1	1	1	-1	-1	1	-1	-1	1	1	-1
binII5660000	II	5660018	-1	1	1	1	1	1	1	1	-1	1	-1	1	-1	1	-1	-1	1	-1	-1	1	-1	-1	1	-1	1	-1	1	-1	1	-1	-1	-1	1	-1	1	1	1	1	1	-1	-1	1	-1	-1	1	1	-1
binII7940000	II	7940051	-1	1	1	1	1	1	1	1	-1	1	-1	1	-1	-1	-1	-1	1	-1	-1	1	-1	1	1	-1	1	-1	1	-1	1	-1	-1	-1	1	-1	1	1	1	1	1	-1	-1	1	-1	-1	1	1	-1
binII7950000	II	7950051	-1	1	1	1	1	1	1	1	-1	1	-1	1	-1	-1	-1	-1	1	-1	-1	1	-1	1	1	-1	1	-1	1	-1	1	-1	-1	-1	1	-1	1	1	1	1	1	-1	-1	1	-1	-1	1	1	-1
binII8730000	II	8730050	-1	1	1	1	1	1	1	1	-1	1	-1	1	-1	-1	-1	-1	1	-1	-1	1	-1	1	1	-1	1	-1	1	-1	1	-1	-1	-1	1	-1	1	1	1	1	1	-1	-1	1	-1	-1	1	1	-1
binII8740000	II	8740050	-1	1	1	1	1	1	1	1	-1	1	-1	1	-1	-1	-1	-1	1	-1	-1	1	-1	1	1	-1	1	-1	1	-1	1	-1	-1	-1	1	-1	1	1	1	1	1	-1	-1	1	-1	-1	1	1	-1
binII11000000	II	11000059	-1	1	1	1	1	1	1	1	-1	1	-1	1	-1	-1	-1	-1	1	-1	-1	1	-1	-1	1	-1	1	-1	1	-1	1	-1	-1	-1	1	-1	1	1	1	1	1	-1	-1	1	-1	-1	1	1	-1
binII11010000	II	11010059	-1	1	1	1	1	1	1	1	-1	1	-1	1	-1	-1	-1	-1	1	-1	-1	1	-1	-1	1	-1	1	-1	1	-1	1	-1	-1	-1	1	-1	1	1	1	1	1	-1	-1	1	-1	-1	1	1	-1
binII11800000	II	11800063	-1	1	1	1	1	1	1	1	1	1	-1	1	-1	-1	-1	-1	1	-1	-1	1	-1	-1	1	-1	1	-1	1	-1	1	-1	-1	-1	1	-1	1	1	1	1	1	-1	-1	1	-1	-1	1	1	-1
binII11810000	II	11810063	-1	1	1	1	1	1	1	1	1	1	-1	1	-1	-1	-1	-1	1	-1	-1	1	-1	-1	1	-1	1	-1	1	-1	1	-1	-1	-1	1	-1	1	1	1	1	1	-1	-1	1	-1	-1	1	1	-1
binII11820000	II	11820063	-1	1	1	1	1	1	1	1	1	1	-1	1	-1	-1	-1	-1	1	-1	-1	1	-1	-1	1	-1	1	-1	1	-1	1	-1	-1	-1	1	-1	1	1	1	1	1	-1	-1	1	-1	-1	1	1	-1
binII11830000	II	11830063	-1	1	1	1	1	1	1	1	1	1	-1	1	-1	-1	-1	-1	1	-1	-1	1	-1	-1	1	-1	1	-1	1	-1	1	-1	-1	-1	1	-1	1	1	1	1	1	-1	-1	1	-1	-1	1	1	-1
binII11930000	II	11930063	-1	1	1	1	1	1	1	1	1	1	-1	1	-1	-1	-1	-1	1	-1	-1	1	-1	-1	1	-1	1	-1	1	-1	1	-1	-1	-1	1	-1	1	1	1	1	1	-1	-1	1	-1	-1	1	1	-1
binII11940000	II	11940063	-1	1	1	1	1	1	1	1	1	1	-1	1	-1	-1	-1	-1	1	-1	-1	1	-1	-1	1	-1	1	-1	1	-1	1	-1	-1	-1	1	-1	1	1	1	1	1	-1	-1	1	-1	-1	1	1	-1
binII11980000	II	11980064	-1	1	1	1	1	1	1	1	1	1	-1	1	-1	-1	-1	-1	1	-1	-1	1	-1	-1	1	-1	1	-1	1	-1	1	-1	-1	-1	1	-1	1	1	1	1	1	-1	-1	1	-1	-1	1	1	-1
binII11990000	II	11990064	-1	1	1	1	1	1	1	1	1	1	-1	1	-1	-1	-1	-1	1	-1	-1	1	1	-1	1	-1	1	-1	1	-1	1	-1	-1	-1	1	-1	1	1	1	1	1	-1	-1	1	-1	-1	1	1	-1
binII12000000	II	12000064	-1	1	1	1	1	1	1	1	1	1	-1	1	-1	-1	-1	-1	1	-1	-1	1	1	-1	1	-1	1	-1	1	-1	1	-1	-1	-1	1	-1	1	1	1	1	1	-1	-1	1	-1	-1	1	1	-1
binII12010000	II	12010064	-1	1	1	1	1	1	1	1	1	1	-1	1	-1	-1	-1	-1	1	-1	-1	1	1	-1	1	-1	1	-1	1	-1	1	-1	-1	-1	1	-1	1	1	1	1	1	-1	-1	1	-1	-1	1	1	-1
binII12110000	II	12110064	-1	1	1	1	1	1	1	1	1	1	-1	1	-1	-1	-1	-1	1	-1	-1	1	1	-1	1	-1	1	-1	1	-1	1	-1	-1	-1	1	-1	1	1	1	1	1	-1	-1	1	-1	-1	1	1	-1
binII12120000	II	12120064	-1	1	1	1	1	1	1	1	1	1	-1	1	-1	-1	-1	-1	1	-1	-1	1	1	-1	1	-1	1	-1	1	-1	1	-1	-1	-1	1	-1	1	1	1	1	1	-1	-1	1	-1	-1	1	1	-1
binII12200000	II	12200064	-1	1	1	1	1	1	1	1	1	1	1	1	-1	-1	1	-1	1	-1	-1	1	1	-1	1	-1	1	-1	1	-1	1	-1	-1	-1	1	-1	-1	1	1	1	1	-1	1	1	1	-1	1	1	-1
binII12210000	II	12210064	-1	1	1	1	1	1	1	1	1	1	1	1	-1	-1	1	-1	1	-1	-1	1	1	-1	1	-1	1	-1	1	-1	1	-1	-1	-1	1	-1	-1	1	1	1	1	-1	1	1	1	-1	1	1	-1
binII12220000	II	12220064	-1	1	1	1	1	1	1	1	1	1	1	1	-1	-1	1	-1	1	-1	-1	1	1	-1	1	-1	1	-1	1	-1	1	-1	-1	-1	1	-1	-1	1	1	1	1	-1	1	1	1	-1	1	1	-1
binII12230000	II	12230064	-1	1	1	1	1	1	1	1	1	1	1	1	-1	-1	1	-1	1	-1	-1	1	1	-1	1	-1	1	-1	1	-1	1	-1	-1	-1	1	-1	-1	1	1	1	1	-1	1	1	1	-1	1	1	-1
binII12240000	II	12240065	-1	1	1	1	1	1	1	1	1	1	1	1	-1	-1	1	-1	1	-1	-1	1	1	-1	1	-1	1	-1	1	-1	1	-1	-1	-1	1	-1	-1	1	1	1	1	-1	1	1	1	-1	1	1	-1
binII12250000	II	12250065	-1	1	1	1	1	1	1	1	1	1	1	1	-1	-1	1	-1	1	-1	-1	1	1	-1	1	-1	1	-1	1	-1	1	-1	-1	-1	1	-1	-1	1	1	1	1	-1	1	1	1	-1	1	1	-1
binII12280000	II	12280064	-1	1	1	1	1	1	1	1	1	1	1	1	-1	-1	1	-1	1	-1	-1	1	1	-1	1	-1	1	-1	1	-1	1	-1	-1	-1	1	-1	-1	1	1	1	1	-1	1	1	1	-1	1	1	-1
binII12290000	II	12290064	-1	1	1	1	1	1	1	1	1	1	1	1	-1	-1	1	-1	1	-1	-1	1	1	-1	1	-1	1	-1	1	-1	1	-1	-1	-1	1	-1	-1	1	1	1	1	-1	1	1	1	-1	1	1	-1
binII12340000	II	12340064	-1	1	1	1	1	1	1	1	1	1	1	1	-1	-1	1	-1	1	-1	-1	1	1	-1	1	-1	1	-1	1	-1	1	-1	-1	-1	1	-1	-1	1	1	1	1	-1	1	1	1	-1	1	1	-1
binII12350000	II	12350064	-1	1	1	1	1	1	1	1	1	1	1	1	-1	-1	1	-1	1	-1	-1	1	1	-1	1	-1	1	-1	1	-1	1	-1	-1	-1	1	-1	-1	1	1	1	1	-1	1	1	1	-1	1	1	-1
binII12580000	II	12580065	-1	1	1	1	1	1	1	1	1	1	1	1	-1	-1	1	-1	1	-1	-1	1	1	-1	1	-1	1	-1	1	-1	1	-1	-1	-1	1	-1	-1	1	1	1	1	-1	1	1	1	-1	1	1	-1
binII12590000	II	12590065	-1	1	1	1	1	1	1	1	1	1	1	1	-1	-1	1	-1	1	-1	-1	1	1	-1	1	-1	1	-1	1	-1	1	-1	-1	-1	1	-1	-1	1	1	1	1	-1	1	1	1	-1	1	1	-1
binII12600000	II	12600065	-1	1	1	1	1	1	1	1	1	1	1	1	-1	-1	1	-1	1	-1	-1	1	1	-1	1	-1	1	-1	1	-1	1	-1	-1	-1	1	-1	-1	1	1	1	1	-1	1	1	1	-1	1	1	-1
binII12970000	II	12970069	-1	1	1	1	1	1	1	1	1	1	1	1	-1	-1	1	-1	1	-1	-1	1	1	-1	1	-1	1	-1	1	-1	1	1	-1	-1	1	-1	-1	1	1	1	1	-1	1	1	-1	-1	1	1	-1
binII12980000	II	12980069	-1	1	1	1	1	1	1	1	1	1	1	1	-1	-1	1	-1	1	-1	-1	1	1	-1	1	-1	1	-1	1	-1	1	1	-1	-1	1	-1	-1	1	1	1	1	-1	1	1	-1	-1	1	1	-1
binII12990000	II	12990069	-1	1	1	1	1	1	1	1	1	1	1	1	-1	-1	1	-1	1	-1	-1	1	1	-1	1	-1	1	-1	1	-1	1	1	-1	-1	1	-1	-1	1	1	1	1	-1	1	1	-1	-1	1	1	-1
binII13000000	II	13000069	-1	1	1	1	1	1	1	1	1	1	1	1	-1	-1	1	-1	1	-1	-1	1	1	-1	1	-1	1	-1	1	-1	1	1	-1	-1	1	-1	-1	1	1	1	1	-1	1	1	-1	-1	1	1	-1
binII13030000	II	13030070	-1	1	1	1	1	1	1	1	1	1	1	1	-1	-1	1	-1	1	-1	-1	1	1	-1	1	-1	1	-1	1	-1	1	1	-1	-1	1	-1	-1	1	1	1	1	-1	1	1	-1	-1	1	1	-1
binII13040000	II	13040070	-1	1	1	1	1	1	1	1	1	1	1	1	-1	-1	1	-1	1	-1	-1	1	1	-1	1	-1	1	-1	1	-1	1	1	-1	-1	1	-1	-1	1	1	1	1	-1	1	1	-1	-1	1	1	-1
binII13060000	II	13060070	-1	1	1	1	1	1	1	1	1	1	1	1	-1	-1	1	-1	1	-1	-1	1	1	-1	1	-1	1	-1	1	-1	1	1	-1	-1	1	-1	-1	1	1	1	1	-1	1	1	-1	-1	1	1	-1
binII13070000	II	13070070	-1	1	1	1	1	1	1	1	1	1	1	1	-1	-1	1	-1	1	-1	-1	1	1	-1	1	-1	1	-1	1	-1	1	1	-1	-1	1	-1	-1	1	1	1	1	-1	1	1	-1	-1	1	1	-1
binII13080000	II	13080070	-1	1	1	1	1	1	1	1	1	1	1	1	-1	-1	1	-1	1	-1	-1	1	1	-1	1	-1	1	-1	1	-1	1	1	-1	-1	1	-1	-1	1	1	1	1	-1	1	1	-1	-1	1	1	-1
binII13160000	II	13160070	-1	1	1	1	1	1	1	1	1	1	1	1	-1	-1	1	-1	1	-1	-1	1	1	-1	1	-1	1	-1	1	-1	1	1	-1	-1	1	-1	-1	1	1	1	1	-1	1	1	-1	-1	1	1	-1
binII13170000	II	13170070	-1	1	1	1	1	1	1	1	1	1	1	1	-1	-1	1	-1	1	-1	-1	1	1	-1	1	-1	1	-1	1	-1	1	1	-1	-1	1	-1	-1	1	1	1	1	-1	1	1	-1	-1	1	1	-1
binII13180000	II	13180070	-1	1	1	1	1	1	1	1	1	1	1	1	-1	-1	1	-1	1	-1	-1	1	1	-1	1	-1	1	-1	1	-1	1	1	-1	-1	1	-1	-1	1	1	1	1	-1	1	1	-1	-1	1	1	-1
binII13190000	II	13190070	-1	1	1	1	1	1	1	1	1	1	1	1	-1	-1	1	-1	1	-1	-1	1	1	-1	1	-1	1	-1	1	-1	1	1	-1	-1	1	-1	-1	1	1	1	1	-1	1	1	-1	-1	1	1	-1
binII13350000	II	13350070	-1	1	1	1	1	1	1	1	1	1	1	1	-1	-1	1	-1	1	-1	-1	1	1	-1	1	-1	1	-1	1	-1	1	1	-1	-1	1	-1	-1	1	1	1	1	-1	1	1	-1	-1	1	1	-1
binII13360000	II	13360070	-1	1	1	1	1	1	1	1	1	1	1	1	-1	-1	1	-1	1	-1	-1	1	1	-1	1	-1	1	-1	1	-1	1	1	-1	-1	1	-1	-1	1	1	1	1	-1	1	1	-1	-1	1	1	-1
binII13370000	II	13370070	-1	1	1	1	1	1	1	1	1	1	1	1	-1	-1	1	-1	1	-1	-1	1	1	-1	1	-1	1	-1	1	-1	1	1	-1	-1	1	-1	-1	1	1	1	1	-1	1	1	-1	-1	1	1	-1
binII13380000	II	13380070	-1	1	1	1	1	1	1	1	1	1	1	1	-1	-1	1	-1	1	-1	-1	1	1	-1	1	-1	1	-1	1	1	1	1	-1	-1	1	-1	-1	1	1	1	1	-1	1	1	-1	-1	1	1	-1
binII13390000	II	13390070	-1	1	1	1	1	1	1	1	1	1	1	1	-1	-1	1	-1	1	-1	-1	1	1	-1	1	-1	1	-1	1	1	1	1	-1	-1	1	-1	-1	1	1	1	1	-1	1	1	-1	-1	1	1	-1
binII13400000	II	13400070	-1	1	1	1	1	1	1	1	1	1	1	1	-1	-1	1	-1	1	-1	-1	1	1	-1	1	-1	1	-1	1	1	1	1	-1	-1	1	-1	-1	1	1	1	1	-1	1	1	-1	-1	1	1	-1
binII13410000	II	13410070	-1	1	1	1	1	1	1	1	1	1	1	1	-1	-1	1	-1	1	-1	-1	1	1	-1	1	-1	1	-1	1	1	1	1	-1	-1	1	-1	-1	1	1	1	1	-1	1	1	-1	-1	1	1	-1
binII13480000	II	13480070	-1	1	1	1	1	1	1	1	1	1	1	1	-1	-1	1	-1	1	-1	-1	1	1	-1	1	-1	1	-1	1	1	1	1	-1	-1	1	-1	-1	1	1	1	1	-1	1	1	-1	-1	1	1	-1
binII13490000	II	13490070	-1	1	1	1	1	1	1	1	1	1	1	1	-1	-1	1	-1	1	-1	-1	1	1	-1	1	-1	1	-1	1	1	1	1	-1	-1	1	-1	-1	1	1	1	1	-1	1	1	-1	-1	1	1	-1
binII13720000	II	13720070	-1	1	1	1	1	1	1	1	1	1	1	1	1	-1	1	-1	1	-1	-1	1	1	-1	-1	1	1	1	1	1	1	1	-1	1	1	-1	-1	-1	1	1	1	-1	1	1	-1	-1	1	1	-1
binII13730000	II	13730070	-1	1	1	1	1	1	1	1	1	1	1	1	1	-1	1	-1	1	-1	-1	1	1	-1	-1	1	1	1	1	1	1	1	-1	1	1	-1	-1	-1	1	1	1	-1	1	1	-1	-1	1	1	-1
binII13880000	II	13880072	-1	1	1	1	1	1	1	1	1	1	1	1	1	-1	1	-1	1	-1	-1	1	1	-1	-1	1	1	1	1	1	1	1	-1	1	1	-1	-1	-1	1	1	1	-1	1	1	-1	-1	1	1	-1
binII13890000	II	13890073	-1	1	1	1	1	1	1	1	1	1	1	1	1	-1	1	-1	1	-1	-1	1	1	-1	-1	1	1	1	1	1	1	1	-1	1	1	-1	-1	-1	1	1	1	-1	1	1	-1	-1	1	1	-1
binII13900000	II	13900073	-1	1	1	1	1	1	1	1	1	1	1	1	1	-1	1	-1	1	-1	-1	1	1	-1	-1	1	1	1	1	1	1	1	-1	1	1	-1	-1	-1	1	1	1	-1	1	1	-1	-1	1	1	-1
binII13910000	II	13910074	-1	1	1	1	1	1	1	1	1	1	1	1	1	-1	1	-1	1	-1	-1	1	1	-1	-1	1	1	1	1	1	1	1	-1	1	1	-1	-1	-1	1	1	1	-1	1	1	-1	-1	1	1	-1
binII14160000	II	14160075	-1	1	1	1	1	1	1	1	1	1	1	1	1	-1	1	-1	1	-1	-1	1	1	-1	-1	1	1	1	1	1	1	1	-1	1	1	-1	-1	-1	1	1	1	-1	1	1	-1	-1	1	1	-1
binII14170000	II	14170075	-1	1	1	1	1	1	1	1	1	1	1	1	1	-1	1	-1	1	-1	-1	1	1	-1	-1	1	1	1	1	1	1	1	-1	1	1	-1	-1	-1	1	1	1	-1	1	1	-1	-1	1	1	-1
binII14350000	II	14350076	-1	1	1	1	1	1	1	1	1	1	1	1	1	-1	1	-1	1	-1	-1	1	1	-1	-1	1	1	1	1	1	1	1	-1	1	1	-1	-1	-1	1	1	1	-1	1	1	-1	-1	1	1	-1
binII14360000	II	14360076	-1	1	1	1	1	1	1	1	1	1	1	1	1	-1	1	-1	1	-1	-1	1	1	-1	-1	1	1	1	1	1	1	1	-1	1	1	-1	-1	-1	1	1	1	-1	1	1	-1	-1	1	1	-1
binII15279345	II	15279421	-1	1	1	1	1	1	1	1	1	1	1	1	1	-1	1	-1	1	-1	-1	1	1	-1	-1	1	1	1	1	1	1	1	-1	1	1	-1	-1	-1	1	1	1	-1	1	1	-1	-1	1	1	-1
binIII10000	III	10000	-1	1	1	1	1	1	1	1	-1	1	-1	-1	1	-1	-1	-1	-1	1	-1	-1	1	1	1	1	-1	-1	-1	-1	-1	1	0	-1	-1	-1	1	1	-1	1	1	1	-1	-1	1	1	1	-1	-1
binIII600000	III	600003	-1	1	1	1	1	1	1	1	-1	1	-1	-1	1	-1	-1	-1	-1	1	-1	-1	1	1	1	1	-1	-1	-1	-1	-1	1	0	-1	-1	-1	1	1	-1	1	1	1	-1	-1	1	1	1	-1	-1
binIII610000	III	610003	-1	1	1	1	1	1	1	1	-1	1	-1	-1	1	-1	-1	-1	-1	1	-1	-1	1	1	1	1	-1	-1	-1	-1	-1	1	0	-1	-1	-1	1	1	-1	1	1	1	-1	-1	1	1	1	-1	-1
binIII990000	III	990011	-1	1	1	1	1	1	1	1	-1	1	-1	-1	1	-1	-1	-1	-1	1	-1	-1	1	1	1	1	-1	-1	-1	-1	-1	1	0	-1	-1	-1	1	1	-1	1	1	1	-1	-1	1	1	1	-1	-1
binIII1000000	III	1000011	-1	1	1	1	1	1	1	1	-1	1	-1	-1	1	-1	-1	-1	-1	1	-1	-1	1	1	1	1	-1	-1	-1	1	-1	1	0	-1	-1	-1	1	1	-1	1	1	1	-1	-1	1	1	1	-1	-1
binIII1160000	III	1160009	-1	1	1	1	1	1	1	1	-1	1	-1	-1	1	-1	-1	-1	-1	1	-1	-1	1	1	1	1	-1	-1	-1	1	-1	1	0	-1	-1	-1	1	1	-1	1	1	1	-1	-1	1	1	1	-1	-1
binIII1170000	III	1170009	-1	1	1	1	1	1	1	1	-1	1	-1	-1	1	-1	-1	-1	-1	1	-1	-1	1	1	1	1	-1	-1	-1	1	-1	1	0	-1	-1	-1	1	1	-1	1	1	1	-1	-1	1	1	1	-1	-1
binIII1540000	III	1540008	-1	1	1	1	1	1	1	1	-1	1	1	-1	1	-1	-1	-1	-1	1	-1	-1	1	1	1	1	-1	-1	-1	1	-1	1	0	-1	-1	-1	1	1	-1	1	1	1	-1	-1	1	-1	1	-1	-1
binIII1550000	III	1550008	-1	1	1	1	1	1	1	1	-1	1	1	-1	1	-1	-1	-1	-1	1	-1	-1	1	1	1	1	-1	-1	-1	-1	-1	1	0	-1	-1	-1	1	1	-1	1	1	1	-1	-1	1	-1	1	-1	-1
binIII1840000	III	1840009	-1	1	1	1	1	1	1	1	-1	1	1	-1	1	-1	-1	-1	-1	1	-1	-1	1	1	1	1	-1	-1	-1	-1	-1	1	0	-1	-1	-1	1	1	-1	1	1	1	-1	-1	1	-1	1	-1	-1
binIII1850000	III	1850009	-1	1	1	1	1	1	1	1	-1	1	1	-1	1	-1	-1	-1	-1	1	-1	-1	1	1	1	1	-1	-1	-1	-1	-1	1	0	-1	-1	-1	1	1	-1	1	1	1	-1	-1	1	-1	1	-1	-1
binIII1890000	III	1890009	-1	1	1	1	1	1	1	1	-1	1	1	-1	1	-1	-1	-1	-1	1	-1	-1	1	1	1	1	-1	-1	-1	-1	-1	1	0	-1	-1	-1	1	1	-1	1	1	1	-1	-1	1	-1	1	-1	-1
binIII1900000	III	1900009	-1	1	1	1	1	1	1	1	-1	1	1	-1	1	-1	-1	-1	-1	1	-1	-1	1	1	1	1	-1	-1	-1	-1	-1	1	0	-1	-1	-1	1	1	-1	1	1	1	-1	-1	1	-1	1	-1	-1
binIII1960000	III	1960009	-1	1	1	1	1	1	1	1	-1	1	1	-1	1	-1	-1	-1	-1	1	-1	-1	1	1	1	1	-1	-1	-1	-1	-1	1	0	-1	-1	-1	1	1	-1	1	1	1	-1	-1	1	-1	1	-1	-1
binIII1970000	III	1970010	-1	1	1	1	1	1	1	1	-1	1	1	-1	1	-1	-1	-1	-1	1	-1	-1	1	1	1	1	-1	-1	-1	1	-1	1	0	-1	-1	-1	1	1	-1	1	1	1	-1	-1	1	-1	1	-1	-1
binIII1980000	III	1980010	-1	1	1	1	1	1	1	1	-1	1	1	-1	1	-1	-1	-1	-1	1	-1	-1	1	1	1	1	-1	-1	-1	1	-1	1	0	-1	-1	-1	1	1	-1	1	1	1	-1	-1	1	-1	1	-1	-1
binIII1990000	III	1990010	-1	1	1	1	1	1	1	1	-1	1	1	-1	1	-1	-1	-1	-1	1	-1	-1	1	1	1	1	-1	-1	-1	1	-1	1	0	-1	-1	-1	1	1	-1	1	1	1	-1	-1	1	-1	1	-1	-1
binIII2050000	III	2050010	-1	1	1	1	1	1	1	1	-1	1	1	-1	1	-1	-1	-1	-1	1	-1	-1	1	1	1	1	-1	-1	-1	1	-1	1	0	-1	-1	-1	1	1	-1	1	1	1	-1	-1	1	-1	1	-1	-1
binIII2060000	III	2060010	-1	1	1	1	1	1	1	1	-1	1	1	-1	1	-1	-1	-1	-1	1	-1	-1	1	1	1	1	-1	-1	-1	1	-1	1	0	-1	-1	-1	1	1	-1	1	1	1	-1	-1	1	-1	1	-1	-1
binIII2320000	III	2320011	-1	1	1	1	1	1	1	1	-1	1	-1	-1	1	-1	1	-1	-1	1	-1	-1	1	1	1	1	-1	-1	-1	1	-1	1	0	-1	-1	-1	1	1	-1	1	1	1	1	-1	1	-1	1	-1	-1
binIII2330000	III	2330010	-1	1	1	1	1	1	1	1	-1	1	-1	-1	1	-1	1	-1	-1	1	-1	-1	1	1	1	1	-1	-1	-1	1	-1	1	0	-1	-1	-1	1	1	-1	1	1	1	1	-1	1	-1	1	-1	-1
binIII2430000	III	2430010	-1	1	1	1	1	1	1	1	-1	1	-1	-1	1	-1	1	-1	-1	1	-1	-1	1	1	1	1	-1	-1	-1	1	-1	1	0	-1	-1	-1	1	1	-1	1	1	1	1	-1	1	-1	1	-1	-1
binIII2440000	III	2440010	-1	1	1	1	1	1	1	1	-1	1	-1	-1	1	-1	1	-1	-1	1	-1	-1	1	1	1	1	-1	-1	-1	1	-1	1	0	-1	-1	-1	1	1	-1	1	1	1	1	-1	1	-1	1	-1	-1
binIII2510000	III	2510010	-1	1	1	1	1	1	1	1	-1	1	-1	-1	1	-1	1	-1	-1	1	-1	-1	1	1	1	1	-1	-1	-1	1	-1	1	0	-1	-1	-1	1	1	-1	1	1	1	1	-1	1	-1	1	-1	-1
binIII2520000	III	2520010	-1	1	1	1	1	1	1	1	-1	1	-1	-1	1	-1	1	-1	-1	1	-1	-1	1	1	1	1	-1	-1	-1	1	-1	1	0	-1	-1	-1	1	1	-1	1	1	1	1	-1	1	-1	1	-1	-1
binIII2560000	III	2560009	-1	1	1	1	1	1	1	1	-1	1	-1	-1	1	-1	1	-1	-1	1	-1	-1	1	1	1	1	-1	-1	-1	1	-1	1	0	-1	-1	-1	1	1	-1	1	1	1	1	-1	1	-1	1	-1	-1
binIII2570000	III	2570009	-1	1	1	1	1	1	1	1	-1	1	-1	-1	1	-1	1	-1	-1	1	-1	-1	1	1	1	1	-1	-1	-1	1	-1	1	0	-1	-1	-1	1	1	-1	1	1	1	1	-1	1	-1	1	-1	-1
binIII2690000	III	2690008	-1	1	1	1	1	1	1	1	-1	1	-1	-1	1	-1	1	-1	-1	1	-1	-1	1	1	1	1	-1	-1	-1	1	-1	1	0	-1	-1	-1	1	1	-1	1	1	1	1	-1	1	-1	1	-1	-1
binIII2700000	III	2700008	-1	1	1	1	1	1	1	1	-1	1	-1	-1	1	-1	1	-1	-1	1	-1	-1	1	1	1	1	-1	-1	-1	1	-1	1	0	-1	-1	-1	1	1	-1	1	1	1	1	-1	1	-1	1	-1	-1
binIII2710000	III	2710008	-1	1	1	1	1	1	1	1	-1	1	-1	-1	1	-1	1	-1	-1	1	-1	-1	1	1	1	1	-1	-1	-1	1	-1	1	0	-1	-1	-1	1	1	-1	1	1	1	1	-1	1	-1	1	-1	-1
binIII2760000	III	2760008	-1	1	1	1	1	1	1	1	-1	1	-1	-1	1	-1	1	-1	-1	1	-1	-1	1	1	1	1	-1	-1	-1	1	-1	1	0	-1	-1	-1	1	1	-1	1	1	1	1	-1	1	-1	1	-1	-1
binIII2770000	III	2770008	-1	1	1	1	1	1	1	1	-1	1	1	-1	1	1	-1	-1	1	1	-1	1	1	1	1	1	-1	-1	1	1	-1	1	0	-1	-1	-1	1	1	-1	1	1	1	1	-1	1	-1	1	-1	-1
binIII2780000	III	2780008	-1	1	1	1	1	1	1	1	-1	1	1	-1	1	1	-1	-1	1	1	-1	1	1	1	1	1	-1	-1	1	1	-1	1	0	-1	-1	-1	1	1	-1	1	1	1	1	-1	1	-1	1	-1	-1
binIII2840000	III	2840008	-1	1	1	1	1	1	1	1	-1	1	1	-1	1	1	-1	-1	1	1	-1	1	1	1	1	1	-1	-1	1	1	-1	1	0	-1	-1	-1	1	1	-1	1	1	1	1	-1	1	-1	1	-1	-1
binIII2850000	III	2850008	-1	1	1	1	1	1	1	1	-1	1	1	-1	1	1	-1	-1	1	1	-1	1	1	1	1	1	-1	-1	1	1	-1	1	0	-1	-1	-1	1	1	-1	1	1	1	1	-1	1	-1	1	-1	-1
binIII2920000	III	2920008	-1	1	1	1	1	1	1	1	-1	1	1	-1	1	1	-1	-1	1	1	-1	1	1	1	1	1	-1	-1	1	1	-1	1	0	-1	-1	-1	1	1	-1	1	1	1	1	-1	1	-1	1	-1	-1
binIII2930000	III	2930008	-1	1	1	1	1	1	1	1	-1	1	1	-1	1	1	-1	-1	1	1	-1	1	1	1	1	1	-1	-1	1	1	-1	1	0	-1	-1	-1	1	1	-1	1	1	1	1	-1	1	-1	1	-1	-1
binIII3070000	III	3070008	-1	1	1	1	1	1	1	1	-1	1	1	-1	1	1	-1	-1	1	1	-1	1	1	1	1	1	-1	-1	1	1	-1	1	0	-1	-1	-1	1	1	-1	1	1	1	1	-1	1	-1	1	-1	-1
binIII3080000	III	3080008	-1	1	1	1	1	1	1	1	-1	1	1	-1	1	1	-1	-1	1	1	-1	1	1	1	1	1	-1	-1	1	1	-1	1	0	-1	-1	-1	1	1	-1	1	1	1	1	-1	1	-1	1	-1	-1
binIII3290000	III	3290009	-1	1	1	1	1	1	1	1	-1	1	1	-1	1	1	-1	-1	1	1	-1	1	1	1	1	1	-1	-1	1	1	-1	1	0	-1	-1	-1	1	1	-1	1	1	1	1	-1	1	-1	1	-1	-1
binIII3300000	III	3300009	-1	1	1	1	1	1	1	1	-1	1	1	-1	1	1	-1	-1	1	1	-1	1	1	1	1	1	-1	-1	1	1	-1	1	0	-1	-1	-1	1	1	-1	1	1	1	1	-1	1	-1	1	-1	-1
binIII3400000	III	3400011	-1	1	1	1	1	1	1	1	-1	1	1	-1	1	1	-1	-1	1	1	-1	1	1	1	1	1	-1	-1	1	1	-1	1	0	-1	-1	-1	1	1	-1	1	1	1	1	-1	1	-1	1	-1	-1
binIII3410000	III	3410011	-1	1	1	1	1	1	1	1	-1	1	1	-1	1	1	-1	-1	1	1	-1	1	1	1	1	1	-1	-1	1	1	-1	1	0	-1	-1	-1	1	1	-1	1	1	1	1	-1	1	-1	1	-1	-1
binIII3890000	III	3890020	-1	1	1	1	1	1	1	1	-1	1	1	-1	1	1	-1	-1	1	1	1	1	1	1	1	1	-1	-1	1	1	-1	1	0	-1	-1	1	1	1	-1	1	1	1	1	-1	1	1	1	-1	1
binIII3900000	III	3900020	-1	1	1	1	1	1	1	1	-1	1	1	-1	1	1	-1	-1	1	1	1	1	1	1	1	1	-1	-1	1	1	-1	1	0	-1	-1	1	1	1	-1	1	1	1	1	-1	1	1	1	-1	1
binIII4290000	III	4290027	-1	1	1	1	1	1	1	1	-1	1	1	-1	1	1	-1	-1	1	1	1	1	1	1	1	1	-1	-1	1	1	-1	1	0	-1	-1	1	1	1	-1	1	1	1	1	-1	1	1	1	-1	1
binIII4300000	III	4300027	-1	1	1	1	1	1	1	1	-1	1	1	-1	1	1	-1	-1	1	1	1	1	1	1	1	1	-1	-1	1	1	-1	1	0	-1	-1	1	1	1	-1	1	1	1	1	-1	1	1	1	-1	1
binIII4310000	III	4310027	-1	1	1	1	1	1	1	1	-1	1	1	-1	1	1	-1	-1	1	1	1	1	-1	1	1	1	-1	-1	1	1	-1	1	0	-1	-1	1	1	1	-1	1	1	1	1	-1	1	1	1	-1	1
binIII5140000	III	5140039	-1	1	1	1	1	1	1	1	-1	1	1	-1	1	1	-1	-1	1	1	1	1	-1	1	1	1	-1	-1	1	1	-1	-1	0	-1	-1	1	1	1	-1	1	1	-1	1	-1	1	1	1	-1	1
binIII5150000	III	5150039	-1	1	1	1	1	1	1	1	-1	1	1	-1	1	1	-1	-1	1	1	1	1	-1	1	1	1	-1	-1	1	1	-1	-1	0	-1	-1	1	1	1	-1	1	1	-1	1	-1	1	1	1	-1	1
binIII5450000	III	5450039	-1	1	1	1	1	1	1	1	-1	1	1	-1	1	1	-1	-1	1	1	1	1	-1	1	1	1	-1	-1	1	1	-1	-1	0	-1	-1	1	1	1	-1	1	1	-1	1	-1	1	1	1	-1	1
binIII5460000	III	5460039	-1	1	1	1	1	1	1	1	-1	1	1	-1	1	1	-1	-1	1	1	1	1	-1	1	1	1	-1	-1	1	1	-1	-1	0	-1	-1	1	1	1	-1	1	1	-1	1	-1	1	1	1	-1	1
binIII5470000	III	5470038	-1	1	1	1	1	1	1	1	-1	1	1	-1	1	1	-1	-1	1	1	1	1	-1	1	1	1	-1	-1	1	1	-1	-1	0	-1	-1	1	1	1	-1	1	1	-1	1	-1	1	1	1	-1	1
binIII6430000	III	6430052	-1	1	1	1	1	1	1	1	-1	1	1	-1	1	1	-1	-1	1	1	1	1	-1	1	1	1	-1	-1	1	1	-1	-1	0	-1	-1	1	1	1	-1	1	1	-1	1	-1	1	1	1	-1	1
binIII6440000	III	6440052	-1	1	1	1	1	1	1	1	-1	1	1	-1	1	1	-1	-1	1	1	1	1	-1	1	1	1	-1	-1	1	1	-1	-1	0	-1	-1	1	1	1	-1	1	1	-1	1	-1	1	1	1	-1	1
binIII8010000	III	8010065	-1	1	1	1	1	1	1	1	-1	1	1	-1	1	1	-1	-1	1	1	1	1	-1	1	1	1	-1	1	1	1	-1	-1	0	-1	-1	1	1	1	-1	1	1	-1	1	-1	1	1	1	-1	1
binIII8020000	III	8020065	-1	1	1	1	1	1	1	1	-1	1	1	-1	1	1	-1	-1	1	1	1	1	-1	1	1	1	-1	1	1	1	-1	-1	0	-1	-1	1	1	1	-1	1	1	-1	1	-1	1	1	1	-1	1
binIII8560000	III	8560080	-1	1	1	1	1	1	1	1	-1	1	1	-1	1	1	-1	-1	1	1	1	1	-1	1	1	1	-1	-1	1	1	-1	-1	0	-1	-1	1	1	1	-1	1	1	-1	1	-1	1	1	1	-1	1
binIII8570000	III	8570081	-1	1	1	1	1	1	1	1	-1	1	1	-1	1	1	-1	-1	1	1	1	1	-1	1	1	1	-1	-1	1	1	-1	-1	0	-1	-1	1	1	1	-1	1	1	-1	1	-1	1	1	1	-1	1
binIII8720000	III	8720081	-1	1	1	1	1	1	1	1	-1	1	1	-1	1	1	-1	-1	1	1	1	1	-1	1	1	1	-1	-1	1	1	-1	-1	0	-1	-1	1	1	1	-1	1	1	-1	1	-1	1	1	1	-1	1
binIII8730000	III	8730081	-1	1	1	1	1	1	1	1	-1	1	1	-1	1	1	-1	-1	1	1	1	1	-1	1	1	1	-1	-1	1	1	-1	-1	0	-1	-1	1	1	1	-1	1	1	-1	1	-1	1	1	1	-1	1
binIII9000000	III	9000077	-1	1	1	1	1	1	1	1	-1	1	1	-1	1	1	-1	-1	1	1	1	1	-1	1	1	1	-1	-1	1	1	-1	-1	0	-1	-1	1	1	1	-1	1	1	-1	1	-1	1	1	1	-1	1
binIII9010000	III	9010077	-1	1	1	1	1	1	1	1	-1	1	1	-1	1	1	-1	-1	1	1	1	1	-1	1	1	1	-1	-1	1	1	-1	-1	0	-1	-1	1	1	1	-1	1	1	-1	1	-1	1	1	1	-1	1
binIII9650000	III	9650084	-1	1	1	1	1	1	1	1	-1	1	1	-1	1	1	-1	-1	1	1	1	1	-1	1	1	1	-1	-1	1	1	-1	-1	0	-1	-1	1	1	1	-1	1	1	-1	1	-1	1	1	1	-1	1
binIII9660000	III	9660084	-1	1	1	1	1	1	1	1	-1	1	1	-1	1	1	-1	-1	1	1	1	1	-1	1	1	1	-1	-1	1	1	-1	-1	0	-1	-1	1	1	1	-1	1	1	-1	1	-1	1	1	1	-1	1
binIII10060000	III	10060091	-1	1	1	1	1	1	1	1	-1	1	1	-1	-1	1	-1	-1	1	1	1	1	-1	1	1	1	-1	-1	1	1	-1	1	0	-1	-1	1	1	1	-1	1	1	-1	1	-1	1	1	1	-1	1
binIII10070000	III	10070092	-1	1	1	1	1	1	1	1	-1	1	1	-1	-1	1	-1	-1	1	1	1	1	-1	1	1	1	-1	-1	1	1	-1	1	0	-1	-1	1	1	1	-1	1	1	-1	1	-1	1	1	1	-1	1
binIII10950000	III	10950099	-1	1	1	1	1	1	1	1	-1	1	1	-1	-1	1	-1	-1	1	1	1	1	-1	1	1	1	-1	-1	1	1	-1	1	0	-1	-1	1	1	1	-1	1	1	-1	1	-1	-1	1	1	-1	1
binIII10960000	III	10960099	-1	1	1	1	1	1	1	1	-1	1	1	-1	-1	1	-1	-1	1	1	1	1	-1	1	1	1	-1	-1	1	1	-1	1	0	-1	-1	1	1	1	-1	1	1	-1	1	-1	-1	1	1	-1	1
binIII11180000	III	11180099	-1	1	1	1	1	1	1	1	1	1	1	-1	-1	1	-1	1	1	1	1	1	-1	1	1	1	-1	1	1	1	-1	1	0	-1	1	1	1	1	-1	1	1	-1	1	-1	-1	1	-1	-1	1
binIII11190000	III	11190099	-1	1	1	1	1	1	1	1	1	1	1	-1	-1	1	-1	1	1	1	1	1	-1	1	1	1	-1	1	1	1	-1	1	0	-1	1	1	1	1	-1	1	1	-1	1	-1	-1	1	-1	-1	1
binIII11200000	III	11200099	-1	1	1	1	1	1	1	1	1	1	1	-1	-1	1	-1	1	1	1	1	1	-1	1	1	1	-1	1	1	1	-1	1	0	-1	1	1	1	1	-1	1	1	-1	1	-1	-1	1	-1	-1	1
binIII11210000	III	11210099	-1	1	1	1	1	1	1	1	1	1	1	-1	-1	1	-1	1	1	1	1	1	-1	1	1	1	-1	1	1	1	-1	1	0	-1	1	1	1	1	-1	1	1	-1	1	-1	-1	1	-1	-1	1
binIII11260000	III	11260099	-1	1	1	1	1	1	1	1	1	1	1	-1	-1	1	-1	1	1	1	1	1	-1	1	1	1	-1	1	1	1	-1	1	0	-1	1	1	1	1	-1	1	1	-1	1	-1	-1	1	-1	-1	1
binIII11270000	III	11270099	-1	1	1	1	1	1	1	1	1	1	1	-1	-1	1	-1	1	1	1	1	1	1	1	1	1	-1	1	1	1	-1	1	0	-1	1	1	1	1	-1	1	1	-1	1	-1	-1	1	-1	-1	1
binIII11290000	III	11290099	-1	1	1	1	1	1	1	1	1	1	1	-1	-1	1	-1	1	1	1	1	1	1	1	1	1	-1	1	1	1	-1	1	0	-1	1	1	1	1	-1	1	1	-1	1	-1	-1	1	-1	-1	1
binIII11300000	III	11300099	-1	1	1	1	1	1	1	1	1	1	1	-1	-1	1	-1	1	1	1	1	1	1	1	1	1	-1	1	1	1	-1	1	0	-1	1	1	1	1	-1	1	1	-1	1	-1	-1	1	-1	-1	1
binIII11310000	III	11310099	-1	1	1	1	1	1	1	1	1	1	1	-1	-1	1	-1	1	1	1	1	1	1	1	1	1	-1	1	1	1	-1	1	0	-1	1	1	1	1	-1	1	1	-1	1	-1	-1	1	-1	-1	1
binIII11320000	III	11320099	-1	1	1	1	1	1	1	1	1	1	1	-1	-1	1	-1	1	1	1	1	1	1	1	1	1	-1	1	1	1	-1	1	0	-1	1	1	1	1	-1	1	1	-1	1	-1	-1	1	-1	-1	1
binIII11410000	III	11410100	-1	1	1	1	1	1	1	1	1	1	1	-1	-1	1	-1	1	1	1	1	1	1	1	1	1	-1	1	1	1	-1	1	0	-1	1	1	1	1	-1	1	1	-1	1	-1	-1	1	-1	-1	1
binIII11420000	III	11420100	-1	1	1	1	1	1	1	1	1	1	1	-1	-1	1	-1	1	1	1	1	1	1	1	1	1	-1	1	1	1	-1	1	0	-1	1	1	1	1	-1	1	1	-1	1	-1	-1	1	-1	-1	1
binIII11570000	III	11570100	-1	1	1	1	1	1	1	1	1	1	1	-1	-1	1	-1	1	1	1	1	1	1	1	1	1	-1	1	1	1	-1	1	0	-1	1	1	1	1	-1	1	1	-1	1	-1	-1	1	-1	-1	1
binIII11580000	III	11580100	-1	1	1	1	1	1	1	1	1	1	1	-1	-1	1	-1	1	1	1	1	1	1	1	1	1	-1	1	1	1	-1	1	0	-1	1	1	1	1	-1	1	1	-1	1	-1	-1	1	-1	-1	1
binIII11610000	III	11610100	-1	1	1	1	1	1	1	1	1	1	1	-1	-1	1	-1	1	1	1	1	1	1	1	1	1	-1	1	1	1	-1	1	0	-1	1	1	1	1	-1	1	1	-1	1	-1	-1	1	-1	-1	1
binIII11620000	III	11620100	-1	1	1	1	1	1	1	1	1	1	1	-1	-1	1	-1	1	1	1	1	1	1	1	1	1	-1	1	1	1	-1	1	0	-1	1	1	1	1	-1	1	1	-1	1	-1	-1	1	-1	-1	1
binIII11810000	III	11810100	-1	1	1	1	1	1	1	1	1	1	1	-1	-1	1	-1	1	1	1	1	1	1	1	1	1	-1	1	1	1	-1	1	0	-1	1	1	1	1	-1	1	1	-1	1	-1	-1	1	-1	-1	1
binIII11820000	III	11820100	-1	1	1	1	1	1	1	1	1	1	1	-1	-1	1	-1	1	1	1	1	1	1	1	1	1	-1	1	1	1	-1	1	0	-1	1	1	1	1	-1	1	1	-1	1	-1	-1	1	-1	-1	1
binIII11920000	III	11920100	-1	1	1	1	1	1	1	1	1	1	-1	-1	-1	1	-1	1	-1	1	1	1	1	-1	1	1	-1	1	1	1	-1	1	0	-1	1	1	1	1	1	1	1	-1	1	-1	-1	1	-1	-1	1
binIII11930000	III	11930100	-1	1	1	1	1	1	1	1	1	1	-1	-1	-1	1	-1	1	-1	1	1	1	1	-1	1	1	-1	1	1	1	-1	1	0	-1	1	1	1	1	1	1	1	-1	1	1	-1	1	-1	-1	1
binIII12130000	III	12130101	-1	1	1	1	1	1	1	1	1	1	-1	-1	-1	1	-1	1	-1	1	1	1	1	-1	1	1	-1	1	1	1	-1	1	0	-1	1	1	1	1	1	1	1	-1	1	1	-1	1	-1	-1	1
binIII12140000	III	12140101	-1	1	1	1	1	1	1	1	1	1	-1	-1	-1	1	-1	1	-1	1	1	1	1	-1	1	1	-1	1	1	1	-1	1	0	-1	1	1	1	1	1	1	1	-1	1	1	-1	1	-1	-1	1
binIII12380000	III	12380101	-1	1	1	1	1	1	1	1	1	1	-1	-1	-1	1	-1	1	-1	1	1	1	1	-1	1	1	-1	1	1	1	-1	1	0	-1	1	1	1	1	1	1	1	-1	1	1	-1	1	-1	-1	1
binIII12390000	III	12390101	-1	1	1	1	1	1	1	1	1	1	-1	-1	-1	1	-1	1	-1	1	1	1	1	-1	1	1	-1	1	1	1	-1	1	0	-1	1	1	1	1	1	1	1	-1	1	1	-1	1	-1	-1	1
binIII12570000	III	12570101	-1	1	1	1	1	1	1	1	1	-1	-1	-1	-1	1	-1	1	-1	1	1	1	1	-1	1	1	-1	-1	1	1	-1	1	0	-1	1	1	1	1	1	1	1	-1	1	1	-1	1	-1	-1	1
binIII12580000	III	12580101	-1	1	1	1	1	1	1	1	1	-1	-1	-1	-1	1	-1	1	-1	1	1	1	1	-1	1	1	-1	-1	1	1	-1	1	0	-1	1	1	1	1	1	1	1	-1	1	1	-1	1	-1	-1	1
binIII12680000	III	12680101	-1	1	1	1	1	1	1	1	1	-1	-1	-1	-1	1	-1	1	-1	1	1	1	1	-1	1	1	-1	-1	1	1	-1	1	0	-1	1	1	1	1	1	1	1	-1	1	1	-1	1	-1	-1	1
binIII12690000	III	12690101	-1	1	1	1	1	1	1	1	1	-1	-1	-1	-1	1	-1	1	-1	1	1	1	1	-1	1	1	-1	-1	1	1	-1	1	0	-1	1	1	1	1	1	1	1	-1	1	1	-1	1	-1	-1	1
binIII12700000	III	12700101	-1	1	1	1	1	1	1	1	1	-1	-1	-1	-1	1	-1	1	-1	1	1	1	1	-1	1	1	-1	-1	1	1	-1	1	0	-1	1	1	1	1	1	1	1	-1	1	1	-1	1	-1	-1	1
binIII12710000	III	12710101	-1	1	1	1	1	1	1	1	1	-1	-1	-1	-1	1	-1	1	-1	1	1	1	1	-1	1	1	-1	-1	1	1	-1	1	0	-1	1	1	1	1	1	1	1	-1	1	1	-1	1	-1	-1	1
binIII12790000	III	12790101	-1	1	1	1	1	1	1	1	1	-1	-1	-1	-1	1	-1	1	-1	1	1	1	1	-1	1	1	-1	-1	1	1	-1	1	0	-1	1	1	1	1	1	1	1	-1	1	1	-1	1	-1	-1	1
binIII12800000	III	12800101	-1	1	1	1	1	1	1	1	1	-1	-1	-1	-1	1	-1	1	-1	1	1	1	1	-1	1	1	-1	-1	1	1	-1	1	0	-1	1	1	1	1	1	1	1	-1	1	1	-1	1	-1	-1	1
binIII13050000	III	13050101	-1	1	1	1	1	1	1	1	1	-1	-1	-1	-1	1	-1	1	1	1	1	1	1	-1	1	1	-1	-1	1	1	-1	1	0	-1	1	1	1	1	1	1	1	-1	1	1	-1	1	-1	-1	1
binIII13060000	III	13060101	-1	1	1	1	1	1	1	1	1	-1	-1	-1	-1	1	-1	1	1	1	1	1	1	-1	1	1	-1	-1	1	1	-1	1	0	-1	1	1	1	1	1	1	1	-1	1	1	-1	1	-1	-1	1
binIII13120000	III	13120101	-1	1	1	1	1	1	1	1	1	-1	-1	-1	-1	1	-1	1	1	1	1	1	1	-1	1	1	-1	-1	1	1	-1	1	0	-1	1	1	1	1	1	1	1	-1	1	1	-1	1	-1	-1	1
binIII13130000	III	13130101	-1	1	1	1	1	1	1	1	1	-1	-1	-1	-1	1	-1	1	1	1	1	1	1	-1	1	1	-1	-1	1	1	-1	1	0	-1	1	1	1	1	1	1	1	-1	1	1	-1	1	-1	-1	1
binIII13783700	III	13783801	-1	1	1	1	1	1	1	1	1	-1	-1	-1	-1	1	-1	1	1	1	1	1	1	-1	1	1	-1	-1	1	1	-1	1	0	-1	1	1	1	1	1	1	1	-1	1	1	-1	1	-1	-1	1
binIV10000	IV	10000	-1	1	1	1	1	1	1	1	1	-1	-1	-1	-1	1	-1	-1	-1	1	1	-1	1	1	1	1	1	-1	-1	1	-1	1	0	1	1	-1	-1	-1	-1	-1	1	-1	-1	-1	-1	-1	1	-1	1
binIV720000	IV	720000	-1	1	1	1	1	1	1	1	1	-1	-1	-1	-1	1	-1	-1	-1	1	1	-1	1	1	1	1	1	-1	-1	1	-1	1	0	1	1	-1	-1	-1	-1	-1	1	-1	-1	-1	-1	-1	1	-1	1
binIV730000	IV	730000	-1	1	1	1	1	1	1	1	1	-1	-1	-1	-1	1	-1	-1	-1	1	1	-1	1	1	1	1	1	-1	-1	1	-1	1	0	1	1	-1	-1	-1	-1	-1	1	-1	-1	-1	-1	-1	1	-1	1
binIV770000	IV	770000	-1	1	1	1	1	1	1	1	1	-1	-1	-1	-1	1	-1	-1	-1	1	1	-1	1	1	1	1	1	-1	-1	1	-1	1	0	-1	-1	-1	-1	-1	-1	-1	1	-1	-1	-1	-1	-1	1	-1	1
binIV780000	IV	780000	-1	1	1	1	1	1	1	1	1	-1	-1	-1	-1	1	-1	-1	-1	1	1	-1	1	1	1	1	1	-1	-1	1	-1	1	0	-1	-1	-1	-1	-1	-1	-1	1	-1	-1	-1	-1	-1	1	-1	1
binIV790000	IV	790000	-1	1	1	1	1	1	1	1	1	-1	-1	-1	-1	1	-1	-1	-1	1	1	-1	1	1	1	1	1	-1	-1	1	-1	1	0	-1	-1	-1	-1	-1	-1	-1	1	-1	-1	-1	-1	-1	1	-1	1
binIV980000	IV	980000	-1	1	1	1	1	1	1	1	1	-1	-1	-1	-1	1	-1	-1	-1	1	1	-1	1	1	1	1	1	-1	-1	1	-1	1	0	-1	-1	-1	-1	-1	-1	-1	1	-1	-1	-1	-1	-1	1	-1	1
binIV990000	IV	990000	-1	1	1	1	1	1	1	1	1	-1	-1	-1	-1	1	-1	-1	-1	1	1	-1	1	1	1	1	1	-1	-1	1	-1	1	0	-1	-1	-1	-1	-1	-1	-1	1	-1	-1	-1	-1	-1	1	-1	1
binIV1000000	IV	1000000	-1	1	1	1	1	1	1	1	1	-1	-1	-1	-1	1	-1	-1	-1	1	1	-1	1	1	1	1	1	-1	-1	1	-1	1	0	-1	-1	-1	-1	-1	-1	-1	1	-1	-1	-1	-1	-1	1	-1	1
binIV1070000	IV	1070000	-1	1	1	1	1	1	1	1	1	-1	-1	-1	-1	1	-1	-1	-1	1	1	-1	1	1	1	1	1	-1	-1	1	-1	1	0	-1	-1	-1	-1	-1	-1	-1	1	-1	-1	-1	-1	-1	1	-1	1
binIV1080000	IV	1080000	-1	1	1	1	1	1	1	1	1	-1	-1	-1	-1	1	-1	-1	-1	-1	1	-1	1	1	1	1	1	-1	-1	1	-1	1	0	-1	-1	-1	-1	-1	-1	-1	1	-1	-1	-1	-1	-1	1	-1	1
binIV1150000	IV	1150000	-1	1	1	1	1	1	1	1	1	-1	-1	-1	-1	1	-1	-1	-1	-1	1	-1	1	1	1	1	1	-1	-1	1	-1	1	0	-1	-1	-1	-1	-1	-1	-1	1	-1	-1	-1	-1	-1	1	-1	1
binIV1160000	IV	1160000	-1	1	1	1	1	1	1	1	1	-1	-1	-1	-1	1	-1	-1	-1	-1	1	-1	1	1	1	1	1	-1	-1	1	-1	1	0	-1	-1	-1	-1	-1	-1	-1	1	-1	-1	-1	-1	-1	1	-1	1
binIV1270000	IV	1270000	-1	1	1	1	1	1	1	1	1	-1	-1	-1	-1	1	-1	-1	-1	-1	1	-1	1	1	1	1	1	-1	-1	1	-1	1	0	-1	-1	-1	-1	-1	-1	-1	1	-1	-1	-1	-1	-1	1	-1	1
binIV1280000	IV	1280000	-1	1	1	1	1	1	1	1	1	-1	-1	-1	-1	1	-1	-1	-1	-1	1	-1	1	1	1	1	1	-1	-1	1	-1	1	0	-1	-1	-1	-1	-1	-1	-1	1	-1	-1	-1	-1	-1	1	-1	1
binIV1320000	IV	1320000	-1	1	1	1	1	1	1	1	1	-1	-1	-1	-1	1	-1	-1	-1	-1	1	-1	1	1	1	1	1	-1	-1	1	-1	1	0	-1	-1	-1	-1	-1	-1	-1	1	-1	-1	-1	-1	-1	1	-1	1
binIV1330000	IV	1330000	-1	1	1	1	1	1	1	1	1	-1	-1	-1	-1	1	-1	-1	-1	-1	1	-1	1	1	1	1	1	-1	-1	1	-1	1	0	-1	-1	-1	-1	-1	-1	-1	1	-1	-1	-1	-1	-1	1	-1	1
binIV1390000	IV	1390001	-1	1	1	1	1	1	1	1	1	-1	-1	-1	-1	1	-1	-1	-1	-1	1	-1	1	1	1	1	1	-1	-1	1	-1	1	0	-1	-1	-1	-1	-1	-1	-1	1	-1	-1	-1	-1	-1	1	-1	1
binIV1400000	IV	1400001	-1	1	1	1	1	1	1	1	1	-1	-1	-1	-1	1	-1	-1	-1	-1	1	-1	1	1	1	1	1	-1	-1	1	-1	1	0	-1	-1	-1	-1	-1	-1	-1	1	-1	-1	-1	-1	-1	1	-1	1
binIV1410000	IV	1410001	-1	1	1	1	1	-1	-1	1	1	-1	-1	-1	-1	1	-1	-1	-1	-1	1	-1	1	1	1	1	1	-1	-1	1	-1	1	0	-1	-1	-1	-1	-1	-1	-1	1	-1	-1	-1	-1	-1	1	-1	1
binIV1470000	IV	1470001	-1	1	1	1	1	-1	-1	1	1	-1	-1	-1	-1	1	-1	-1	-1	-1	1	-1	1	1	1	1	1	-1	-1	1	-1	1	0	-1	-1	-1	-1	-1	-1	-1	1	-1	-1	-1	-1	-1	1	-1	1
binIV1480000	IV	1480001	-1	1	1	1	1	-1	-1	1	1	-1	-1	-1	-1	1	-1	-1	-1	-1	1	-1	1	1	1	1	1	-1	-1	1	-1	1	0	-1	-1	-1	-1	-1	-1	-1	1	-1	-1	-1	-1	-1	1	-1	1
binIV1650000	IV	1650001	-1	1	1	1	1	-1	-1	1	1	-1	-1	-1	-1	1	-1	-1	-1	-1	1	-1	1	1	1	1	1	-1	-1	1	-1	1	0	-1	-1	-1	-1	-1	-1	-1	1	-1	-1	-1	-1	-1	1	-1	1
binIV1660000	IV	1660001	-1	1	1	1	1	-1	-1	1	1	-1	-1	-1	-1	1	-1	-1	-1	-1	1	-1	1	1	1	1	1	-1	-1	1	-1	1	0	-1	-1	-1	-1	-1	-1	-1	1	-1	-1	-1	-1	-1	1	-1	1
binIV1820000	IV	1820001	-1	1	1	1	1	-1	-1	1	1	-1	-1	-1	-1	1	-1	-1	-1	-1	1	-1	1	1	1	1	1	-1	-1	1	-1	1	0	-1	-1	-1	-1	-1	-1	-1	1	-1	-1	-1	-1	-1	1	-1	1
binIV1830000	IV	1830001	-1	1	1	1	1	-1	-1	1	1	-1	-1	-1	-1	1	-1	-1	-1	-1	1	-1	1	1	1	1	1	-1	-1	1	-1	1	0	-1	-1	-1	-1	-1	-1	-1	1	-1	-1	-1	-1	-1	1	-1	1
binIV1920000	IV	1920000	-1	1	1	1	1	-1	-1	1	-1	-1	-1	-1	-1	1	-1	-1	-1	1	1	1	1	1	1	1	1	-1	-1	1	-1	1	0	-1	-1	-1	-1	-1	-1	-1	1	-1	-1	-1	-1	-1	1	-1	1
binIV1930000	IV	1930000	-1	1	1	1	1	-1	-1	1	-1	-1	-1	-1	-1	1	-1	-1	-1	1	1	1	1	1	1	1	1	-1	-1	1	-1	1	0	-1	-1	-1	-1	-1	-1	-1	1	-1	-1	-1	-1	-1	1	-1	1
binIV1960000	IV	1960000	-1	1	1	1	1	-1	-1	1	-1	-1	-1	-1	-1	1	-1	-1	-1	1	1	1	1	1	1	1	1	-1	-1	1	-1	1	0	-1	-1	-1	-1	-1	-1	-1	1	-1	-1	-1	-1	-1	1	-1	1
binIV1970000	IV	1970000	-1	1	1	1	1	-1	-1	1	-1	-1	-1	-1	-1	1	-1	-1	-1	1	1	1	1	1	1	1	1	-1	-1	1	-1	1	0	-1	-1	-1	-1	-1	-1	-1	1	-1	-1	-1	-1	-1	1	-1	1
binIV1990000	IV	1990000	-1	1	1	1	1	-1	-1	1	-1	-1	-1	-1	-1	1	-1	-1	-1	1	1	1	1	1	1	1	1	-1	-1	1	-1	1	0	-1	-1	-1	-1	-1	-1	-1	1	-1	-1	-1	-1	-1	1	-1	1
binIV2000000	IV	2000000	-1	1	1	1	1	-1	-1	1	-1	-1	-1	-1	-1	1	-1	-1	-1	1	1	1	1	1	1	1	1	-1	-1	1	-1	1	0	-1	-1	-1	-1	-1	-1	-1	1	-1	-1	-1	-1	-1	1	-1	1
binIV2040000	IV	2040000	-1	1	1	1	1	-1	-1	1	-1	-1	-1	-1	-1	1	-1	-1	-1	1	1	1	1	1	1	1	1	-1	-1	1	-1	1	0	-1	-1	-1	-1	-1	-1	-1	1	-1	-1	-1	-1	-1	1	-1	1
binIV2050000	IV	2050000	-1	1	1	1	1	-1	-1	1	-1	-1	-1	-1	-1	1	-1	-1	-1	1	1	1	1	1	1	1	1	-1	-1	1	-1	1	0	-1	-1	-1	-1	-1	-1	-1	1	-1	-1	-1	-1	-1	1	-1	1
binIV2070000	IV	2070000	-1	1	1	1	1	-1	-1	1	-1	-1	-1	-1	-1	1	-1	-1	-1	1	1	1	1	1	1	1	1	-1	-1	1	-1	1	0	-1	-1	-1	-1	-1	-1	-1	1	-1	-1	-1	-1	-1	1	-1	1
binIV2080000	IV	2080000	-1	1	1	1	1	-1	-1	1	-1	-1	-1	-1	-1	1	-1	-1	-1	1	1	1	1	1	1	1	1	-1	-1	1	-1	1	0	-1	-1	-1	-1	-1	-1	-1	1	-1	-1	-1	-1	-1	1	-1	1
binIV2120000	IV	2120000	-1	1	1	1	1	-1	-1	1	-1	-1	-1	-1	-1	1	-1	-1	-1	1	1	1	1	1	1	1	1	-1	-1	1	-1	1	0	-1	-1	-1	-1	-1	-1	-1	1	-1	-1	-1	-1	-1	1	-1	1
binIV2130000	IV	2130000	-1	1	1	1	1	-1	-1	1	-1	-1	-1	-1	-1	1	-1	-1	-1	1	1	1	1	1	1	1	1	-1	-1	1	-1	1	0	-1	-1	-1	-1	-1	-1	-1	1	-1	-1	-1	-1	-1	1	-1	1
binIV2190000	IV	2190000	-1	1	1	1	1	-1	-1	1	-1	-1	-1	-1	-1	1	-1	-1	-1	1	1	1	1	1	1	1	1	-1	-1	1	-1	1	0	-1	-1	-1	-1	-1	-1	-1	1	-1	-1	-1	-1	-1	1	-1	1
binIV2200000	IV	2200000	-1	1	1	1	1	-1	-1	1	-1	-1	-1	-1	-1	1	-1	-1	-1	1	1	1	1	1	1	1	1	-1	-1	1	-1	1	0	-1	-1	-1	-1	-1	-1	-1	1	-1	-1	-1	-1	-1	1	-1	1
binIV2210000	IV	2210000	-1	1	1	1	1	-1	-1	1	-1	-1	-1	-1	-1	1	-1	-1	-1	1	1	1	1	1	1	1	1	-1	-1	1	-1	1	0	-1	-1	-1	-1	-1	-1	-1	1	-1	-1	-1	-1	-1	1	-1	1
binIV2220000	IV	2220000	-1	1	1	1	1	-1	-1	1	-1	-1	-1	-1	-1	1	-1	-1	-1	1	1	1	1	1	1	1	1	-1	-1	1	-1	1	0	-1	-1	-1	-1	-1	-1	-1	-1	-1	-1	-1	-1	-1	1	-1	1
binIV2250000	IV	2250000	-1	1	1	1	1	-1	-1	1	-1	-1	-1	-1	-1	1	-1	-1	-1	1	1	1	1	1	1	1	1	-1	-1	1	-1	1	0	-1	-1	-1	-1	-1	-1	-1	-1	-1	-1	-1	-1	-1	1	-1	1
binIV2260000	IV	2260000	-1	1	1	1	1	-1	-1	1	-1	-1	-1	-1	-1	1	-1	-1	-1	1	1	1	1	1	1	1	1	-1	-1	1	-1	1	0	-1	-1	-1	-1	-1	-1	-1	-1	-1	-1	-1	-1	-1	1	-1	1
binIV2270000	IV	2270000	-1	1	1	1	1	-1	-1	1	-1	-1	-1	-1	-1	1	-1	-1	-1	1	1	1	1	1	1	1	1	-1	-1	1	-1	1	0	-1	-1	-1	-1	-1	-1	-1	-1	-1	-1	-1	-1	-1	1	-1	1
binIV2400000	IV	2400001	-1	1	1	1	1	-1	-1	1	-1	-1	-1	-1	-1	1	-1	-1	-1	1	1	1	1	1	1	1	1	-1	-1	1	-1	1	0	-1	-1	-1	-1	-1	-1	-1	-1	-1	-1	-1	-1	-1	1	-1	1
binIV2410000	IV	2410001	-1	1	1	1	1	-1	-1	1	-1	-1	-1	-1	-1	1	-1	-1	-1	1	1	1	1	1	1	1	1	-1	-1	1	-1	1	0	-1	-1	-1	-1	-1	-1	-1	-1	-1	-1	-1	-1	-1	1	-1	1
binIV2440000	IV	2440001	-1	1	1	1	1	-1	-1	1	-1	-1	-1	-1	-1	1	-1	-1	-1	1	1	1	1	1	1	1	1	-1	-1	1	-1	1	0	-1	-1	-1	-1	-1	-1	-1	-1	-1	-1	-1	-1	-1	1	-1	1
binIV2450000	IV	2450001	-1	1	1	1	1	-1	-1	1	-1	-1	-1	-1	-1	1	-1	-1	-1	1	1	1	1	1	1	1	1	-1	-1	1	-1	1	0	-1	-1	-1	-1	-1	-1	-1	-1	-1	-1	-1	-1	-1	1	-1	1
binIV2490000	IV	2490001	-1	1	1	1	1	-1	-1	1	-1	-1	-1	-1	-1	1	-1	-1	-1	1	1	1	1	1	1	1	1	-1	-1	1	-1	1	0	-1	-1	-1	-1	-1	-1	-1	-1	-1	-1	-1	-1	-1	1	-1	1
binIV2500000	IV	2500001	-1	1	1	1	1	-1	-1	1	-1	-1	-1	-1	-1	1	-1	-1	-1	1	1	1	1	1	1	1	1	-1	-1	1	-1	1	0	-1	-1	-1	-1	-1	-1	-1	-1	-1	-1	-1	-1	-1	1	-1	1
binIV2510000	IV	2510001	-1	1	1	1	1	-1	-1	1	-1	-1	-1	-1	-1	1	-1	-1	-1	1	1	1	1	1	1	1	1	-1	-1	1	-1	1	0	-1	-1	-1	-1	-1	-1	-1	-1	-1	-1	-1	-1	-1	1	-1	1
binIV2530000	IV	2530001	-1	1	1	1	1	-1	-1	1	-1	-1	-1	-1	-1	1	-1	-1	-1	1	1	1	1	1	1	1	1	-1	-1	1	-1	1	0	-1	-1	-1	-1	-1	-1	-1	-1	-1	-1	-1	-1	-1	1	-1	1
binIV2540000	IV	2540001	-1	1	1	1	1	-1	-1	1	-1	-1	-1	-1	-1	1	-1	-1	-1	1	1	1	1	1	1	1	1	-1	-1	1	-1	1	0	-1	-1	-1	-1	-1	-1	-1	-1	-1	-1	-1	-1	-1	1	-1	1
binIV2550000	IV	2550002	-1	1	1	1	1	-1	-1	1	-1	-1	-1	-1	-1	1	-1	-1	-1	1	1	1	1	1	1	1	1	-1	-1	1	-1	1	0	-1	-1	-1	-1	-1	-1	-1	-1	-1	-1	-1	-1	-1	1	-1	1
binIV2610000	IV	2610002	-1	1	1	1	1	-1	-1	1	-1	-1	-1	-1	-1	1	-1	-1	-1	1	1	1	1	1	1	1	1	-1	-1	1	-1	1	0	-1	-1	-1	-1	-1	-1	-1	-1	-1	-1	-1	-1	-1	1	-1	1
binIV2620000	IV	2620002	-1	1	1	1	1	-1	-1	1	-1	-1	-1	-1	-1	1	-1	-1	-1	1	1	1	1	1	1	1	1	-1	-1	1	-1	1	0	-1	-1	-1	-1	-1	-1	-1	-1	-1	-1	-1	-1	-1	1	-1	1
binIV2630000	IV	2630002	-1	1	1	1	1	-1	-1	1	-1	-1	-1	-1	-1	1	-1	-1	-1	1	1	1	1	1	1	1	1	-1	-1	1	-1	1	0	-1	-1	-1	-1	-1	-1	-1	-1	-1	-1	-1	-1	-1	1	-1	1
binIV2720000	IV	2720002	-1	1	1	1	1	-1	-1	1	-1	-1	-1	-1	-1	1	-1	-1	-1	1	1	-1	1	1	1	1	1	-1	-1	1	-1	1	0	1	-1	-1	-1	-1	-1	-1	-1	-1	-1	-1	-1	-1	1	-1	1
binIV2730000	IV	2730002	-1	1	1	1	1	-1	-1	1	-1	-1	-1	-1	-1	1	-1	-1	-1	1	1	-1	1	1	1	1	1	-1	-1	1	-1	1	0	1	-1	-1	-1	-1	-1	-1	-1	-1	-1	-1	-1	-1	1	-1	1
binIV2740000	IV	2740002	-1	1	1	1	1	-1	-1	1	-1	-1	-1	-1	-1	1	-1	-1	-1	1	1	-1	1	1	1	1	1	-1	-1	1	-1	1	0	1	-1	-1	-1	-1	-1	-1	-1	-1	-1	-1	-1	-1	1	-1	1
binIV2750000	IV	2750002	-1	1	1	1	1	-1	-1	1	-1	-1	-1	-1	-1	1	-1	-1	-1	1	1	-1	1	1	1	1	1	-1	-1	1	-1	1	0	1	-1	-1	-1	-1	-1	-1	-1	-1	-1	-1	-1	-1	1	1	1
binIV2790000	IV	2790002	-1	1	1	1	1	-1	-1	1	-1	-1	-1	-1	-1	1	-1	-1	-1	1	1	-1	1	1	1	1	1	-1	-1	1	-1	1	0	1	-1	-1	-1	-1	-1	-1	-1	-1	-1	-1	-1	-1	1	1	1
binIV2800000	IV	2800002	-1	1	1	1	1	-1	-1	1	-1	-1	-1	-1	-1	1	-1	-1	-1	1	1	-1	1	1	1	1	1	-1	-1	1	-1	1	0	1	-1	-1	-1	-1	-1	-1	-1	-1	-1	-1	-1	-1	1	1	1
binIV3470000	IV	3470003	-1	1	1	1	1	-1	-1	1	-1	-1	-1	-1	-1	1	-1	-1	-1	1	1	-1	1	1	1	1	1	-1	-1	1	-1	1	0	1	-1	-1	-1	-1	-1	-1	-1	-1	-1	-1	-1	-1	1	1	1
binIV3480000	IV	3480003	-1	1	1	1	1	-1	-1	1	-1	-1	-1	-1	-1	1	-1	-1	-1	1	1	-1	1	1	1	1	1	-1	-1	1	-1	1	0	1	-1	-1	-1	-1	-1	-1	-1	-1	-1	-1	-1	-1	1	1	1
binIV3800000	IV	3800005	-1	1	1	1	1	-1	-1	1	-1	-1	-1	-1	-1	-1	-1	-1	-1	1	1	1	1	1	1	1	1	-1	1	1	-1	1	0	1	-1	-1	-1	-1	1	-1	-1	-1	-1	-1	-1	-1	1	1	1
binIV3810000	IV	3810005	-1	1	1	1	1	-1	-1	1	-1	-1	-1	-1	-1	-1	-1	-1	-1	1	1	1	1	1	1	1	1	-1	1	1	-1	1	0	1	-1	-1	-1	-1	1	-1	-1	-1	-1	-1	-1	-1	1	1	1
binIV4030000	IV	4030006	-1	1	1	1	1	-1	-1	1	-1	-1	-1	-1	-1	-1	-1	-1	-1	1	1	1	1	1	1	1	1	-1	1	1	-1	1	0	1	-1	-1	-1	-1	1	-1	-1	-1	-1	-1	-1	-1	1	1	1
binIV4040000	IV	4040006	-1	1	1	1	1	-1	-1	1	-1	-1	-1	-1	-1	-1	-1	-1	-1	1	1	1	1	1	1	1	1	-1	1	1	-1	1	0	1	-1	-1	-1	-1	1	-1	-1	-1	-1	-1	-1	-1	1	1	1
binIV4240000	IV	4240007	-1	1	1	1	1	-1	-1	1	-1	-1	-1	-1	-1	-1	-1	-1	-1	1	1	1	1	1	1	1	1	-1	1	1	-1	1	0	1	-1	-1	-1	-1	1	-1	-1	-1	-1	-1	-1	-1	1	1	1
binIV4250000	IV	4250007	-1	1	1	1	1	-1	-1	1	-1	-1	-1	-1	-1	-1	-1	-1	-1	1	1	1	1	1	1	1	1	-1	1	1	-1	1	0	1	-1	-1	-1	-1	1	-1	-1	-1	-1	-1	-1	-1	1	1	1
binIV4350000	IV	4350007	-1	1	1	1	1	-1	-1	1	-1	-1	-1	-1	-1	-1	-1	-1	-1	1	1	1	1	1	1	1	1	-1	1	1	-1	1	0	1	-1	-1	-1	-1	1	-1	-1	-1	-1	-1	-1	-1	1	1	1
binIV4360000	IV	4360007	-1	1	1	1	1	-1	-1	1	-1	-1	-1	-1	-1	-1	-1	-1	-1	1	1	1	1	1	1	1	1	-1	1	1	-1	1	0	1	-1	-1	-1	-1	1	-1	-1	-1	-1	-1	-1	-1	1	1	1
binIV4600000	IV	4600008	-1	1	1	1	1	-1	-1	1	-1	-1	-1	-1	-1	-1	-1	-1	-1	1	1	1	1	1	1	1	1	-1	1	1	-1	1	0	1	-1	-1	-1	-1	1	-1	-1	-1	-1	-1	-1	-1	1	1	-1
binIV4610000	IV	4610008	-1	1	1	1	1	-1	-1	1	-1	-1	-1	-1	-1	-1	-1	-1	-1	1	1	1	1	1	1	1	1	-1	1	1	-1	1	0	1	-1	-1	-1	-1	1	-1	-1	-1	-1	-1	-1	-1	1	1	-1
binIV5140000	IV	5140008	-1	1	1	1	1	-1	-1	1	-1	-1	-1	-1	-1	-1	-1	-1	-1	1	1	1	1	1	1	1	1	-1	1	1	-1	1	0	1	-1	-1	-1	-1	1	-1	-1	-1	-1	-1	-1	-1	1	1	-1
binIV5150000	IV	5150008	-1	1	1	1	1	-1	-1	1	-1	-1	-1	-1	-1	-1	-1	-1	-1	1	1	1	1	1	1	1	1	-1	1	1	-1	1	0	1	-1	-1	-1	-1	1	-1	-1	-1	-1	-1	-1	-1	1	1	-1
binIV6440000	IV	6440011	-1	1	1	1	1	-1	-1	1	-1	-1	-1	-1	-1	-1	-1	-1	-1	1	1	1	1	1	1	1	1	-1	1	1	-1	1	0	1	-1	-1	-1	-1	1	-1	-1	-1	-1	-1	-1	-1	1	1	-1
binIV6450000	IV	6450011	-1	1	1	1	1	1	-1	1	-1	-1	-1	-1	-1	-1	-1	-1	-1	1	1	1	1	1	1	1	1	-1	1	1	-1	1	0	1	-1	-1	-1	-1	1	-1	-1	-1	-1	-1	-1	-1	1	1	-1
binIV7920000	IV	7920012	-1	1	1	1	1	1	-1	1	-1	-1	-1	-1	-1	-1	-1	-1	-1	1	1	1	1	-1	1	1	1	-1	1	1	-1	1	0	1	-1	-1	-1	-1	1	-1	-1	-1	-1	-1	-1	-1	1	1	-1
binIV7930000	IV	7930012	-1	1	1	1	1	1	-1	1	-1	-1	-1	-1	-1	-1	-1	-1	-1	1	1	1	1	-1	1	1	1	-1	1	1	-1	1	0	1	-1	-1	-1	-1	1	-1	-1	-1	-1	-1	-1	-1	1	1	-1
binIV8820000	IV	8820013	-1	1	1	1	1	1	-1	1	-1	-1	-1	-1	-1	-1	-1	-1	-1	1	1	1	1	-1	1	1	1	-1	1	1	-1	1	0	1	-1	-1	-1	-1	1	-1	-1	-1	-1	-1	-1	-1	1	1	-1
binIV8830000	IV	8830013	-1	1	1	1	1	1	-1	1	-1	-1	-1	-1	-1	-1	-1	-1	-1	1	1	1	1	-1	1	1	1	-1	1	1	-1	1	0	1	-1	-1	-1	-1	1	-1	-1	-1	-1	-1	-1	-1	1	1	-1
binIV9070000	IV	9070015	-1	1	1	1	1	1	-1	1	-1	-1	-1	-1	-1	-1	-1	-1	-1	1	1	1	1	-1	1	1	1	-1	1	1	-1	1	0	1	-1	-1	-1	-1	1	-1	-1	-1	-1	-1	-1	-1	1	1	-1
binIV9080000	IV	9080015	-1	1	1	1	1	1	-1	1	-1	-1	-1	-1	-1	-1	-1	-1	-1	1	1	1	1	-1	1	1	1	-1	1	1	-1	1	0	1	-1	-1	-1	-1	1	-1	-1	-1	-1	-1	-1	-1	1	1	-1
binIV9520000	IV	9520017	-1	1	1	1	1	1	-1	1	-1	-1	-1	-1	-1	-1	-1	-1	-1	1	1	1	1	-1	1	1	1	-1	1	1	-1	1	0	1	-1	-1	-1	-1	1	-1	-1	-1	-1	-1	-1	-1	1	1	-1
binIV9530000	IV	9530017	-1	1	1	1	1	1	-1	1	-1	-1	-1	-1	-1	-1	-1	-1	-1	1	1	1	1	-1	1	1	1	-1	1	1	-1	1	0	1	-1	-1	-1	-1	1	-1	-1	-1	-1	-1	-1	-1	1	1	-1
binIV9710000	IV	9710017	-1	1	1	1	1	1	-1	1	-1	-1	-1	-1	-1	-1	-1	-1	-1	1	1	1	1	-1	1	1	1	-1	1	1	-1	1	0	1	-1	-1	-1	-1	1	-1	-1	-1	-1	-1	-1	-1	1	1	-1
binIV9720000	IV	9720019	-1	1	1	1	1	1	-1	1	-1	-1	-1	-1	-1	-1	-1	-1	-1	1	1	1	1	-1	1	1	1	-1	1	1	-1	1	0	1	-1	-1	-1	-1	1	-1	-1	-1	-1	-1	-1	-1	1	1	-1
binIV9860000	IV	9860020	-1	1	1	1	1	1	-1	1	-1	-1	-1	-1	-1	-1	-1	-1	-1	1	1	1	1	-1	1	1	1	-1	1	1	-1	1	0	1	-1	-1	-1	-1	1	-1	-1	-1	-1	-1	-1	-1	1	1	-1
binIV9870000	IV	9870021	-1	1	1	1	1	1	-1	1	-1	-1	-1	-1	-1	-1	-1	-1	-1	1	1	1	1	-1	1	1	1	-1	1	1	-1	1	0	1	-1	-1	-1	-1	1	-1	-1	-1	-1	-1	-1	-1	1	1	-1
binIV10240000	IV	10240022	-1	1	1	1	1	1	-1	1	-1	-1	-1	-1	-1	-1	-1	-1	-1	1	1	1	1	-1	1	1	1	-1	1	1	-1	1	0	1	-1	-1	-1	-1	1	-1	-1	-1	-1	-1	-1	-1	1	1	-1
binIV10250000	IV	10250022	-1	1	1	1	1	1	-1	1	-1	-1	-1	-1	-1	-1	-1	-1	-1	1	1	1	1	-1	1	1	1	-1	1	1	-1	1	0	1	-1	-1	-1	-1	1	-1	-1	-1	-1	-1	-1	-1	1	1	-1
binIV10270000	IV	10270022	-1	1	1	1	1	1	-1	1	-1	-1	-1	-1	-1	-1	-1	-1	-1	1	1	1	1	-1	1	1	1	-1	1	1	-1	1	0	1	-1	-1	-1	-1	1	-1	-1	-1	-1	-1	-1	-1	1	1	-1
binIV10280000	IV	10280022	-1	1	1	1	1	1	-1	1	-1	-1	-1	-1	-1	-1	-1	-1	-1	1	1	1	1	-1	1	1	1	-1	1	1	-1	1	0	1	-1	-1	-1	-1	1	-1	-1	-1	-1	-1	-1	-1	1	1	-1
binIV10290000	IV	10290022	-1	1	1	1	1	1	-1	1	-1	-1	-1	-1	-1	-1	-1	-1	-1	1	1	1	1	-1	1	1	1	-1	1	1	-1	1	0	1	-1	-1	-1	-1	1	-1	-1	-1	-1	-1	-1	-1	1	1	-1
binIV10830000	IV	10830020	-1	1	1	1	1	1	-1	1	-1	-1	-1	-1	-1	-1	-1	-1	-1	1	1	1	1	-1	1	1	1	-1	1	1	-1	1	0	1	-1	-1	-1	-1	1	-1	-1	-1	-1	-1	-1	-1	1	1	-1
binIV10840000	IV	10840020	-1	1	1	1	1	1	-1	1	-1	-1	-1	-1	-1	-1	-1	-1	-1	1	1	1	1	-1	1	1	1	-1	1	1	-1	1	0	1	-1	-1	-1	-1	1	-1	-1	-1	-1	-1	-1	-1	1	1	-1
binIV10890000	IV	10890021	-1	1	1	1	1	1	-1	1	-1	-1	-1	-1	-1	-1	-1	-1	-1	1	1	1	1	-1	1	1	1	-1	1	1	-1	1	0	1	-1	-1	-1	-1	1	-1	-1	-1	-1	-1	-1	-1	1	1	-1
binIV10900000	IV	10900021	-1	1	1	1	1	1	-1	1	-1	-1	-1	-1	-1	-1	-1	-1	-1	1	1	1	1	-1	1	1	1	-1	1	1	-1	1	0	1	-1	-1	-1	-1	1	-1	-1	-1	-1	-1	-1	-1	1	1	-1
binIV11160000	IV	11160021	-1	1	1	1	1	1	-1	1	-1	-1	-1	-1	-1	-1	-1	-1	-1	1	1	1	1	-1	1	1	1	-1	1	1	-1	1	0	1	-1	-1	-1	-1	1	-1	-1	-1	-1	-1	-1	-1	1	1	-1
binIV11170000	IV	11170021	-1	1	1	1	1	1	-1	1	-1	-1	-1	-1	-1	-1	-1	-1	-1	1	1	1	1	-1	1	1	1	-1	1	1	-1	1	0	1	-1	-1	-1	-1	1	-1	-1	-1	-1	-1	-1	-1	1	1	-1
binIV11180000	IV	11180021	-1	1	1	1	1	1	-1	1	-1	-1	-1	-1	-1	-1	-1	-1	-1	1	1	1	1	-1	1	1	1	-1	1	1	-1	1	0	1	-1	-1	-1	-1	1	-1	-1	-1	-1	-1	-1	-1	1	1	-1
binIV11980000	IV	11980023	-1	1	1	1	1	1	-1	1	-1	-1	-1	-1	-1	-1	-1	-1	-1	1	1	1	1	-1	1	1	1	-1	1	1	-1	1	0	1	-1	-1	-1	-1	1	-1	-1	-1	-1	-1	-1	-1	1	1	-1
binIV11990000	IV	11990023	-1	1	1	1	1	1	-1	1	-1	-1	-1	-1	-1	-1	-1	-1	-1	1	1	1	1	-1	1	1	1	-1	1	1	-1	1	0	1	-1	-1	-1	-1	1	-1	-1	-1	-1	-1	-1	-1	1	1	-1
binIV12510000	IV	12510023	-1	1	1	1	1	1	-1	1	-1	-1	-1	-1	-1	-1	-1	-1	-1	1	-1	1	1	-1	1	-1	1	-1	1	1	-1	1	0	1	-1	-1	-1	-1	1	1	-1	1	-1	-1	-1	-1	1	1	-1
binIV12520000	IV	12520022	-1	1	1	1	1	1	-1	1	-1	-1	-1	-1	-1	-1	-1	-1	-1	1	-1	1	-1	-1	1	-1	1	-1	1	1	-1	1	0	1	-1	-1	-1	-1	1	1	-1	1	-1	-1	-1	-1	1	1	-1
binIV12740000	IV	12740023	-1	1	1	1	1	1	-1	1	-1	-1	-1	-1	-1	-1	-1	-1	-1	1	-1	1	-1	-1	1	-1	1	-1	1	1	-1	1	0	1	-1	-1	-1	-1	1	1	-1	1	-1	-1	-1	-1	1	1	-1
binIV12750000	IV	12750023	-1	1	1	1	1	1	-1	1	-1	-1	-1	-1	-1	-1	-1	-1	-1	1	-1	1	-1	-1	1	-1	1	-1	1	1	-1	1	0	1	-1	-1	-1	-1	1	1	-1	1	-1	-1	-1	-1	1	1	-1
binIV13170000	IV	13170024	-1	1	1	1	1	1	-1	1	-1	-1	-1	-1	-1	-1	-1	-1	-1	1	-1	1	-1	-1	1	-1	1	-1	1	1	-1	1	0	1	-1	-1	-1	-1	1	1	-1	1	-1	-1	-1	-1	1	1	-1
binIV13180000	IV	13180024	-1	1	1	1	1	1	-1	1	-1	-1	-1	-1	-1	-1	-1	-1	-1	1	-1	1	-1	-1	1	-1	1	-1	1	1	-1	1	0	1	-1	-1	-1	-1	1	1	-1	1	-1	-1	-1	-1	1	1	-1
binIV13290000	IV	13290024	-1	1	1	1	1	1	-1	1	-1	-1	-1	-1	1	-1	-1	1	-1	-1	-1	1	-1	1	1	-1	-1	-1	1	1	-1	-1	0	1	-1	-1	-1	-1	-1	1	-1	1	-1	-1	-1	-1	1	1	-1
binIV13300000	IV	13300024	-1	1	1	1	1	1	-1	1	-1	-1	-1	-1	1	-1	-1	1	-1	-1	-1	1	-1	1	1	-1	-1	-1	1	1	-1	-1	0	1	-1	-1	-1	-1	-1	1	-1	1	-1	-1	-1	-1	1	1	-1
binIV13320000	IV	13320024	-1	1	1	1	1	1	-1	1	-1	-1	-1	-1	1	-1	-1	1	-1	-1	-1	1	-1	1	1	-1	-1	-1	1	1	-1	-1	0	1	-1	-1	-1	-1	-1	1	-1	1	-1	-1	-1	-1	1	1	-1
binIV13330000	IV	13330024	-1	1	1	1	1	1	-1	1	-1	-1	-1	-1	1	-1	-1	1	-1	-1	-1	1	-1	1	1	-1	-1	-1	1	1	-1	-1	0	1	-1	-1	-1	-1	-1	1	-1	1	-1	-1	-1	-1	1	1	-1
binIV13340000	IV	13340024	-1	1	1	1	1	1	1	1	-1	-1	-1	-1	1	-1	-1	1	-1	-1	-1	1	-1	1	1	-1	-1	-1	1	1	-1	-1	0	1	-1	-1	-1	-1	-1	1	-1	1	-1	-1	-1	-1	1	1	-1
binIV13510000	IV	13510024	-1	1	1	1	1	1	1	1	-1	-1	-1	-1	1	-1	-1	1	-1	-1	-1	1	-1	1	1	-1	-1	-1	1	1	-1	-1	0	1	-1	-1	-1	-1	-1	1	-1	1	-1	-1	-1	-1	1	1	-1
binIV13520000	IV	13520024	-1	1	1	1	1	1	1	1	-1	-1	-1	-1	1	-1	-1	1	-1	-1	-1	1	-1	1	1	-1	-1	-1	1	1	-1	-1	0	1	-1	-1	-1	-1	-1	1	-1	1	-1	-1	-1	-1	1	1	-1
binIV14630000	IV	14630028	-1	1	1	1	1	1	1	1	-1	-1	1	-1	1	-1	-1	1	-1	-1	-1	1	-1	1	1	-1	-1	-1	1	1	-1	-1	0	1	-1	-1	-1	-1	-1	1	-1	1	-1	-1	-1	-1	1	1	-1
binIV14640000	IV	14640028	-1	1	1	1	1	1	1	1	-1	-1	1	-1	1	-1	-1	1	-1	-1	-1	1	-1	1	1	-1	-1	-1	1	1	-1	-1	0	1	-1	-1	-1	-1	-1	1	-1	1	-1	-1	-1	-1	1	-1	-1
binIV14770000	IV	14770032	-1	1	1	1	1	1	1	1	-1	-1	1	-1	1	-1	1	1	-1	-1	-1	1	-1	1	1	-1	-1	-1	1	1	-1	-1	0	1	-1	-1	-1	-1	-1	1	-1	1	-1	-1	-1	-1	1	-1	-1
binIV14780000	IV	14780032	-1	1	1	1	1	1	1	1	-1	-1	1	-1	1	-1	1	1	-1	-1	-1	1	-1	1	1	-1	-1	-1	1	1	-1	-1	0	1	-1	-1	-1	-1	-1	1	-1	1	-1	-1	-1	-1	1	-1	-1
binIV14910000	IV	14910032	-1	1	1	1	1	1	1	1	-1	-1	1	-1	1	-1	1	1	-1	-1	-1	1	-1	1	1	-1	-1	-1	1	1	-1	-1	0	1	-1	-1	-1	-1	-1	1	-1	1	-1	-1	-1	-1	1	-1	-1
binIV14920000	IV	14920032	-1	1	1	1	1	1	1	1	-1	-1	1	-1	1	-1	1	1	-1	-1	-1	1	-1	1	1	-1	-1	-1	1	1	-1	-1	0	1	-1	-1	-1	-1	-1	1	-1	1	-1	-1	-1	-1	1	-1	-1
binIV15060000	IV	15060032	-1	1	1	1	1	1	1	1	-1	-1	1	-1	1	-1	1	1	-1	-1	-1	1	-1	1	1	-1	-1	-1	1	1	-1	-1	0	1	-1	-1	-1	-1	-1	1	-1	1	-1	-1	-1	-1	1	-1	-1
binIV15070000	IV	15070032	-1	1	1	1	1	1	1	1	-1	-1	1	-1	1	-1	1	1	-1	-1	-1	1	-1	1	1	-1	-1	-1	1	1	-1	-1	0	1	-1	-1	-1	-1	-1	1	-1	1	-1	-1	-1	-1	1	-1	-1
binIV15420000	IV	15420032	-1	1	1	1	1	1	1	1	-1	-1	1	-1	1	-1	1	1	-1	-1	-1	1	-1	1	1	-1	-1	-1	1	1	-1	-1	0	1	-1	-1	-1	-1	-1	1	-1	1	-1	-1	-1	-1	1	-1	-1
binIV15430000	IV	15430032	-1	1	1	1	1	1	1	1	-1	-1	1	-1	1	-1	1	1	-1	-1	-1	1	-1	1	1	-1	-1	-1	1	1	-1	-1	0	1	-1	-1	-1	-1	-1	1	-1	1	-1	-1	-1	-1	1	-1	-1
binIV15440000	IV	15440032	-1	1	1	1	1	1	1	1	-1	-1	1	-1	1	-1	1	1	-1	-1	-1	1	-1	1	1	-1	-1	-1	1	1	1	-1	0	1	-1	-1	-1	-1	-1	1	-1	1	-1	-1	-1	-1	1	-1	-1
binIV15450000	IV	15450032	-1	1	1	1	1	1	1	1	-1	-1	1	-1	1	-1	1	1	-1	-1	-1	1	-1	1	1	-1	-1	-1	1	1	1	-1	0	1	-1	-1	-1	-1	-1	1	-1	1	-1	-1	-1	-1	1	-1	-1
binIV15500000	IV	15500032	-1	1	1	1	1	1	1	1	-1	-1	1	-1	1	-1	1	1	-1	-1	-1	1	-1	1	1	-1	-1	-1	1	1	1	-1	0	1	-1	-1	-1	-1	-1	1	-1	1	-1	-1	-1	-1	1	-1	-1
binIV15510000	IV	15510032	-1	1	1	1	1	1	1	1	-1	-1	1	-1	1	-1	1	1	-1	-1	-1	1	-1	1	1	-1	-1	-1	1	1	1	-1	0	1	-1	-1	-1	-1	-1	1	-1	1	-1	-1	-1	-1	1	-1	-1
binIV15970000	IV	15970032	-1	1	1	1	1	1	1	1	-1	-1	1	-1	1	-1	1	1	-1	-1	-1	1	-1	1	1	-1	1	-1	1	1	1	-1	0	1	-1	-1	-1	-1	-1	1	-1	1	-1	-1	-1	-1	1	-1	-1
binIV15980000	IV	15980032	-1	1	1	1	1	1	1	1	-1	-1	1	-1	1	-1	1	1	-1	-1	-1	1	-1	1	1	-1	1	-1	1	1	1	-1	0	1	-1	-1	-1	-1	-1	1	-1	1	-1	-1	-1	-1	1	-1	-1
binIV16110000	IV	16110032	-1	1	1	1	1	1	1	1	-1	-1	1	-1	1	-1	1	1	-1	-1	-1	1	-1	1	1	-1	1	-1	1	1	1	-1	0	1	-1	-1	-1	-1	-1	1	-1	1	-1	-1	-1	-1	1	-1	-1
binIV16120000	IV	16120032	-1	1	1	1	1	1	1	1	-1	-1	1	-1	1	-1	1	1	-1	-1	-1	1	-1	1	1	-1	1	-1	1	1	1	-1	0	1	-1	-1	-1	-1	-1	1	-1	1	-1	-1	-1	-1	1	-1	-1
binIV16230000	IV	16230032	-1	1	1	1	1	1	1	1	-1	-1	1	-1	1	-1	1	1	-1	-1	-1	1	-1	1	1	-1	1	-1	1	1	1	-1	0	1	-1	-1	-1	-1	-1	1	-1	1	-1	-1	-1	-1	1	-1	-1
binIV16240000	IV	16240032	-1	1	1	1	1	1	1	1	-1	-1	1	-1	1	-1	1	1	-1	-1	-1	1	-1	1	1	-1	1	-1	1	1	1	-1	0	1	-1	-1	-1	-1	-1	1	-1	1	-1	-1	-1	-1	1	-1	-1
binIV16580000	IV	16580033	-1	1	1	1	1	1	1	1	-1	-1	1	-1	1	-1	1	1	-1	-1	-1	1	-1	1	1	-1	1	-1	1	1	1	-1	0	1	-1	-1	-1	-1	-1	1	-1	1	-1	-1	-1	-1	1	-1	-1
binIV16590000	IV	16590033	-1	1	1	1	1	1	1	1	-1	-1	1	-1	1	-1	1	1	-1	-1	-1	1	-1	1	1	-1	1	-1	1	1	1	-1	0	1	-1	-1	-1	-1	-1	1	-1	1	-1	-1	-1	-1	1	-1	-1
binIV17493793	IV	17493829	-1	1	1	1	1	1	1	1	-1	-1	1	-1	1	-1	1	1	-1	-1	-1	1	-1	1	1	-1	1	-1	1	1	1	-1	0	1	-1	-1	-1	-1	-1	1	-1	1	-1	-1	-1	-1	1	-1	-1
binV10000	V	10000	-1	1	1	1	1	1	1	1	-1	-1	1	-1	-1	-1	1	-1	-1	-1	1	1	-1	1	-1	1	-1	1	1	-1	1	1	0	-1	-1	-1	-1	-1	-1	-1	-1	1	1	1	1	1	-1	-1	-1
binV590000	V	589999	-1	1	1	1	1	1	1	1	-1	-1	1	-1	-1	-1	1	-1	-1	-1	1	1	-1	1	-1	1	-1	1	1	-1	1	1	0	-1	-1	-1	-1	-1	-1	-1	-1	1	1	1	1	1	-1	-1	-1
binV600000	V	599999	-1	1	1	1	1	1	1	1	-1	-1	1	-1	-1	-1	1	-1	-1	-1	1	1	-1	1	-1	1	-1	1	1	-1	1	1	0	-1	-1	-1	-1	-1	-1	-1	-1	1	1	1	1	1	-1	-1	-1
binV1010000	V	1009999	-1	1	1	1	1	1	1	1	-1	-1	1	-1	-1	-1	1	-1	-1	-1	1	1	-1	1	-1	1	-1	1	1	-1	1	1	0	-1	-1	-1	-1	-1	-1	-1	-1	1	1	1	1	1	-1	-1	-1
binV1020000	V	1019999	-1	1	1	1	1	1	1	1	-1	-1	1	-1	-1	-1	1	-1	-1	-1	1	1	-1	1	-1	1	-1	1	1	-1	1	1	0	-1	-1	-1	-1	-1	-1	-1	-1	1	1	1	1	1	-1	-1	-1
binV1150000	V	1149999	-1	1	1	1	1	1	1	1	-1	-1	1	-1	-1	-1	1	-1	-1	-1	1	1	-1	1	-1	1	-1	1	1	-1	1	1	0	-1	-1	-1	-1	-1	-1	-1	-1	1	1	1	1	1	-1	-1	-1
binV1160000	V	1159999	-1	1	1	1	1	1	1	1	-1	-1	1	-1	-1	-1	1	-1	-1	-1	1	1	-1	1	-1	1	-1	1	1	-1	1	1	0	-1	-1	-1	-1	-1	-1	-1	-1	1	1	1	1	1	-1	-1	-1
binV2040000	V	2040001	-1	1	1	1	1	1	1	1	-1	-1	1	-1	-1	-1	1	-1	-1	-1	1	1	-1	-1	-1	1	-1	1	1	-1	1	1	0	-1	-1	-1	-1	-1	-1	-1	-1	1	1	1	1	1	-1	-1	-1
binV2050000	V	2050001	-1	1	1	1	1	1	1	1	-1	-1	1	-1	-1	-1	1	-1	-1	-1	1	1	-1	-1	-1	1	-1	1	1	-1	1	1	0	-1	-1	-1	-1	-1	-1	-1	-1	1	1	1	1	1	-1	-1	-1
binV2550000	V	2550001	-1	1	1	1	1	1	1	1	-1	-1	1	-1	-1	-1	-1	-1	-1	1	1	1	-1	-1	-1	1	-1	1	1	-1	1	-1	0	-1	1	-1	-1	-1	-1	-1	-1	1	-1	1	1	1	-1	-1	-1
binV2560000	V	2560001	-1	1	1	1	1	1	1	1	-1	-1	1	-1	-1	-1	-1	-1	-1	1	1	1	-1	-1	-1	1	-1	1	1	-1	1	-1	0	-1	1	-1	-1	-1	-1	-1	-1	1	-1	1	1	1	-1	-1	-1
binV2720000	V	2720002	-1	1	1	1	1	1	1	1	-1	-1	1	-1	-1	-1	-1	-1	-1	1	1	1	-1	-1	-1	1	-1	1	1	-1	1	-1	0	-1	1	-1	-1	-1	-1	-1	-1	1	-1	1	1	1	-1	-1	-1
binV2730000	V	2730002	-1	1	1	1	1	1	1	1	-1	-1	1	-1	-1	-1	-1	-1	-1	1	1	1	-1	-1	-1	1	-1	1	1	-1	1	-1	0	-1	1	-1	-1	-1	-1	-1	-1	1	-1	1	1	1	-1	-1	-1
binV2780000	V	2780002	-1	1	1	1	1	1	1	1	-1	-1	1	-1	-1	-1	-1	-1	-1	1	1	1	-1	-1	-1	1	-1	1	1	-1	1	-1	0	-1	1	-1	-1	-1	-1	-1	-1	1	-1	1	1	1	-1	-1	-1
binV2790000	V	2790002	-1	1	1	1	1	1	1	1	-1	-1	1	-1	-1	-1	-1	-1	-1	1	1	1	-1	-1	-1	1	-1	1	1	-1	1	-1	0	-1	1	-1	-1	-1	-1	-1	-1	1	-1	1	1	1	-1	-1	-1
binV2940000	V	2940002	-1	1	1	1	1	1	1	1	-1	-1	1	-1	-1	-1	-1	-1	-1	1	1	1	-1	-1	-1	1	-1	1	1	-1	1	-1	0	-1	1	-1	-1	-1	-1	-1	-1	1	-1	1	1	1	-1	-1	-1
binV2950000	V	2950002	-1	1	1	1	1	1	1	1	-1	-1	1	-1	-1	-1	-1	-1	-1	1	1	1	-1	-1	-1	1	-1	1	1	-1	1	-1	0	-1	1	-1	-1	-1	-1	-1	-1	1	-1	1	1	1	-1	1	-1
binV3040000	V	3040002	-1	1	1	1	1	1	1	1	-1	-1	1	-1	-1	-1	-1	-1	-1	1	1	1	-1	-1	-1	1	-1	1	1	-1	1	-1	0	-1	1	-1	-1	-1	-1	-1	-1	1	-1	1	1	1	-1	1	-1
binV3050000	V	3050002	-1	1	1	1	1	1	1	1	-1	-1	1	-1	-1	-1	-1	-1	-1	1	1	1	-1	-1	-1	1	-1	1	1	-1	1	-1	0	-1	1	-1	-1	-1	-1	-1	-1	1	-1	1	1	1	-1	1	-1
binV3100000	V	3100002	-1	1	1	1	1	1	1	1	-1	-1	1	-1	-1	-1	-1	-1	-1	1	1	1	-1	-1	-1	1	-1	1	1	-1	1	-1	0	-1	1	-1	-1	-1	-1	-1	-1	1	-1	1	1	1	-1	1	-1
binV3110000	V	3110002	-1	1	1	1	1	1	1	1	-1	-1	1	-1	-1	-1	-1	-1	-1	1	1	1	-1	-1	-1	1	-1	1	1	-1	1	-1	0	-1	1	-1	-1	-1	-1	-1	-1	1	-1	1	1	1	-1	1	-1
binV3440000	V	3440003	-1	1	1	1	1	1	1	1	-1	-1	1	-1	-1	-1	-1	-1	-1	1	1	1	-1	-1	-1	1	-1	1	1	-1	1	-1	0	-1	1	-1	-1	-1	-1	-1	-1	1	-1	1	1	1	-1	1	-1
binV3450000	V	3450003	-1	1	1	1	1	1	1	1	-1	-1	1	-1	-1	-1	-1	-1	-1	1	1	1	-1	-1	-1	1	-1	1	1	-1	1	-1	0	-1	1	-1	-1	-1	-1	-1	-1	1	-1	1	1	1	-1	1	-1
binV3840000	V	3840015	-1	1	1	1	1	1	1	1	-1	-1	1	-1	-1	-1	-1	-1	-1	1	1	1	-1	-1	-1	1	-1	1	1	-1	1	-1	0	-1	1	-1	-1	-1	-1	-1	-1	1	-1	1	1	1	-1	1	-1
binV3850000	V	3850015	-1	1	1	1	1	1	1	1	-1	-1	1	-1	-1	-1	-1	-1	-1	1	1	1	-1	-1	-1	1	-1	1	1	-1	1	-1	0	-1	1	-1	-1	-1	-1	-1	-1	1	-1	1	1	1	-1	1	-1
binV3860000	V	3860015	-1	1	1	1	1	1	1	1	-1	-1	1	-1	-1	-1	-1	-1	-1	1	1	1	-1	-1	-1	1	-1	1	1	-1	1	-1	0	-1	1	-1	-1	-1	-1	-1	-1	1	-1	1	1	1	-1	1	-1
binV3900000	V	3900015	-1	1	1	1	1	1	1	1	-1	-1	1	-1	-1	-1	-1	-1	-1	1	1	1	-1	-1	-1	1	-1	1	1	-1	1	-1	0	-1	1	-1	-1	-1	-1	-1	-1	1	-1	1	1	1	-1	1	-1
binV3910000	V	3910015	-1	1	1	1	1	1	1	1	-1	-1	1	-1	-1	-1	-1	-1	-1	1	1	1	-1	-1	-1	1	-1	1	1	-1	1	-1	0	-1	1	-1	-1	-1	-1	-1	-1	1	-1	1	1	1	-1	1	-1
binV3920000	V	3920015	-1	1	1	1	1	1	1	1	-1	-1	1	-1	-1	-1	-1	-1	-1	1	1	1	-1	-1	-1	1	-1	1	1	-1	1	-1	0	-1	1	-1	-1	-1	-1	-1	-1	1	-1	1	1	1	-1	1	-1
binV4420000	V	4420014	-1	1	1	1	1	1	1	1	-1	-1	1	-1	-1	-1	-1	-1	-1	1	1	-1	-1	-1	-1	1	-1	1	1	-1	1	-1	0	-1	-1	-1	-1	-1	-1	-1	-1	1	-1	1	1	1	-1	1	-1
binV4430000	V	4430014	-1	1	1	1	1	1	1	1	-1	-1	1	-1	-1	-1	-1	-1	-1	1	1	-1	-1	-1	-1	1	-1	1	1	-1	1	-1	0	-1	-1	-1	-1	-1	-1	-1	-1	1	-1	1	1	1	-1	1	-1
binV5130000	V	5130015	-1	1	1	1	1	1	1	1	-1	-1	1	-1	-1	-1	-1	-1	-1	1	1	-1	-1	-1	-1	1	-1	1	1	-1	1	-1	0	-1	-1	-1	-1	-1	-1	-1	-1	1	-1	1	1	1	-1	1	-1
binV5140000	V	5140015	-1	1	1	1	1	1	1	1	-1	-1	1	-1	-1	-1	-1	-1	-1	1	1	-1	-1	-1	-1	1	-1	1	1	-1	1	-1	0	-1	-1	-1	-1	-1	-1	-1	-1	1	-1	1	1	1	-1	1	-1
binV6560000	V	6560017	-1	1	1	1	1	1	1	1	-1	-1	1	-1	-1	-1	-1	-1	-1	1	1	-1	-1	-1	-1	-1	1	1	1	-1	1	-1	0	1	-1	-1	1	-1	-1	-1	-1	-1	-1	1	1	1	-1	1	-1
binV6570000	V	6570017	-1	1	1	1	1	1	1	1	-1	-1	1	-1	-1	-1	-1	-1	-1	1	1	-1	-1	-1	-1	-1	1	1	1	-1	1	-1	0	1	-1	-1	1	-1	-1	-1	-1	-1	-1	1	1	1	-1	1	-1
binV7170000	V	7170019	-1	1	1	1	1	1	1	1	-1	-1	1	-1	-1	-1	-1	-1	-1	1	1	-1	-1	-1	-1	-1	1	1	1	-1	1	-1	0	1	-1	-1	1	-1	-1	-1	-1	-1	-1	1	1	1	-1	1	-1
binV7180000	V	7180019	-1	1	1	1	1	1	1	1	-1	-1	1	-1	-1	-1	-1	-1	-1	1	1	-1	-1	-1	-1	-1	1	1	1	-1	1	-1	0	1	-1	-1	1	-1	-1	-1	-1	-1	-1	1	1	1	-1	1	-1
binV8170000	V	8170020	-1	1	1	1	1	1	1	1	-1	-1	1	-1	-1	-1	-1	-1	-1	1	1	-1	-1	-1	-1	-1	1	1	1	-1	1	-1	0	1	-1	-1	1	-1	-1	-1	-1	-1	-1	1	1	1	-1	1	-1
binV8180000	V	8180020	-1	1	1	1	1	1	1	1	-1	-1	1	-1	-1	-1	-1	-1	-1	1	1	-1	-1	-1	-1	-1	1	1	1	-1	1	-1	0	1	-1	-1	1	-1	-1	-1	-1	-1	-1	1	1	1	-1	1	-1
binV8410000	V	8410020	-1	1	1	1	1	1	1	1	-1	-1	1	-1	-1	-1	-1	-1	-1	1	1	-1	-1	-1	-1	-1	1	1	1	-1	1	-1	0	1	-1	-1	1	-1	-1	-1	-1	-1	-1	1	1	1	-1	1	-1
binV8420000	V	8420020	-1	1	1	1	1	1	1	1	-1	-1	1	-1	-1	-1	-1	-1	-1	1	1	-1	-1	-1	-1	-1	1	1	1	-1	1	-1	0	1	-1	-1	1	-1	-1	-1	-1	-1	-1	1	1	1	-1	1	-1
binV9020000	V	9020022	-1	1	1	1	1	1	1	1	-1	-1	1	-1	-1	-1	-1	-1	-1	1	1	-1	-1	-1	-1	-1	1	1	1	-1	1	-1	0	1	-1	-1	1	-1	-1	-1	-1	-1	-1	1	1	1	-1	1	-1
binV9030000	V	9030022	-1	1	1	1	1	1	1	1	-1	-1	1	-1	-1	-1	-1	-1	-1	1	1	-1	-1	-1	-1	-1	1	1	1	-1	1	-1	0	1	-1	-1	1	-1	-1	-1	-1	-1	-1	1	1	1	-1	-1	-1
binV10140000	V	10140025	-1	1	1	1	1	1	1	1	-1	-1	1	-1	-1	-1	-1	-1	1	1	1	-1	-1	1	-1	-1	1	1	1	-1	1	-1	0	1	-1	-1	1	-1	-1	-1	-1	-1	-1	1	1	1	-1	-1	-1
binV10150000	V	10150025	-1	1	1	1	1	1	1	1	-1	-1	1	-1	-1	-1	-1	-1	1	1	1	-1	-1	1	-1	-1	1	1	1	-1	1	-1	0	1	-1	-1	1	-1	-1	-1	-1	-1	-1	1	1	1	-1	-1	-1
binV10550000	V	10550023	-1	1	1	1	1	1	1	1	-1	-1	1	-1	-1	-1	-1	-1	1	1	1	-1	-1	1	-1	-1	1	1	1	-1	1	-1	0	1	-1	-1	1	-1	-1	-1	-1	-1	-1	1	1	1	-1	-1	-1
binV10560000	V	10560023	-1	1	1	1	1	1	1	1	-1	-1	1	-1	-1	-1	-1	-1	1	1	1	-1	-1	1	-1	-1	1	1	1	-1	1	-1	0	1	-1	-1	1	-1	-1	-1	-1	-1	-1	1	1	1	-1	-1	-1
binV10580000	V	10580023	-1	1	1	1	1	1	1	1	-1	-1	1	-1	-1	-1	-1	-1	1	1	1	-1	-1	1	-1	-1	1	1	1	-1	1	-1	0	1	-1	-1	1	-1	-1	-1	-1	-1	-1	1	1	1	-1	-1	-1
binV10590000	V	10590023	-1	1	1	1	1	1	1	1	-1	-1	1	-1	-1	-1	-1	-1	1	1	1	-1	-1	1	-1	-1	1	1	1	-1	1	-1	0	1	-1	-1	1	-1	-1	-1	-1	-1	-1	1	1	1	-1	-1	-1
binV11360000	V	11360018	-1	1	1	1	1	1	1	1	-1	-1	1	-1	-1	-1	-1	-1	1	1	1	-1	-1	1	-1	-1	1	1	1	-1	1	-1	0	1	-1	1	1	-1	-1	-1	-1	-1	-1	1	1	1	-1	-1	-1
binV11370000	V	11370018	-1	1	1	1	1	1	1	1	-1	-1	1	-1	-1	-1	-1	-1	1	1	1	-1	-1	1	-1	-1	1	1	1	-1	1	-1	0	1	-1	1	1	-1	-1	-1	-1	-1	-1	1	1	1	-1	-1	-1
binV11380000	V	11380018	-1	1	1	1	1	1	1	1	-1	-1	1	-1	-1	-1	-1	-1	1	1	1	-1	-1	1	-1	-1	1	1	1	-1	1	-1	0	1	-1	1	1	-1	-1	-1	-1	-1	-1	1	1	1	-1	-1	-1
binV11790000	V	11790019	-1	1	1	1	1	1	1	1	-1	-1	1	-1	-1	-1	-1	-1	1	1	1	-1	-1	1	-1	-1	1	1	1	-1	1	-1	0	1	-1	1	1	-1	-1	-1	-1	-1	-1	1	1	1	-1	-1	-1
binV11800000	V	11800019	-1	1	1	1	1	1	1	1	-1	-1	1	-1	-1	-1	-1	-1	1	1	1	-1	-1	1	-1	-1	1	1	1	-1	1	-1	0	1	-1	1	1	-1	-1	-1	-1	-1	-1	1	1	1	-1	-1	-1
binV12010000	V	12010019	-1	1	1	1	1	1	1	1	-1	-1	1	-1	-1	-1	-1	-1	1	1	1	-1	-1	1	-1	-1	1	1	1	-1	1	-1	0	1	-1	1	1	-1	-1	-1	-1	-1	-1	1	1	1	-1	-1	-1
binV12020000	V	12020019	-1	1	1	1	1	1	1	1	-1	-1	1	-1	-1	-1	-1	-1	1	1	1	-1	-1	1	-1	-1	1	1	1	-1	1	-1	0	1	-1	1	1	-1	-1	-1	-1	-1	-1	-1	1	1	-1	-1	-1
binV12410000	V	12410019	-1	1	1	1	1	1	1	1	-1	-1	1	-1	-1	-1	-1	-1	1	1	1	-1	-1	1	-1	-1	1	1	1	-1	1	-1	0	1	-1	1	1	-1	-1	-1	-1	-1	-1	-1	1	1	-1	-1	-1
binV12420000	V	12420019	-1	1	1	1	1	1	1	1	1	-1	1	-1	-1	-1	-1	-1	1	1	1	-1	-1	1	-1	-1	1	1	1	-1	1	-1	0	1	-1	1	1	-1	-1	-1	-1	-1	-1	-1	1	1	-1	-1	-1
binV13380000	V	13380013	-1	1	1	1	1	1	1	1	1	-1	1	-1	-1	-1	-1	-1	1	1	1	-1	-1	1	-1	-1	1	1	1	-1	1	-1	0	1	-1	1	1	-1	-1	-1	-1	-1	-1	-1	1	1	-1	-1	-1
binV13390000	V	13390013	-1	1	1	1	1	1	1	1	1	-1	1	-1	-1	-1	-1	-1	1	1	1	-1	-1	1	-1	-1	1	1	1	-1	1	-1	0	1	-1	1	1	-1	-1	-1	-1	-1	-1	-1	1	1	-1	-1	-1
binV13610000	V	13610012	-1	1	1	1	1	1	1	1	1	-1	1	-1	-1	-1	-1	-1	1	1	1	-1	-1	1	-1	-1	1	1	1	-1	1	-1	0	1	-1	1	1	1	-1	-1	-1	-1	-1	-1	1	1	-1	-1	-1
binV13620000	V	13620012	-1	1	1	1	1	1	1	1	1	-1	1	-1	-1	-1	-1	-1	1	1	1	-1	-1	1	-1	-1	1	1	1	-1	1	-1	0	1	-1	1	1	1	-1	-1	-1	-1	-1	-1	1	1	-1	-1	-1
binV14290000	V	14290015	-1	1	1	1	1	1	1	1	1	-1	1	-1	-1	-1	-1	-1	1	1	1	-1	-1	1	-1	-1	1	1	1	-1	1	-1	0	1	-1	1	1	1	-1	-1	-1	-1	-1	-1	1	1	-1	-1	-1
binV14300000	V	14300015	-1	1	1	1	1	1	1	1	1	-1	1	-1	-1	-1	-1	-1	1	1	1	-1	-1	1	-1	-1	1	1	1	-1	1	-1	0	1	-1	1	1	1	-1	-1	-1	-1	-1	-1	1	1	-1	-1	-1
binV14640000	V	14640015	-1	1	1	1	1	1	1	1	1	1	1	-1	-1	-1	-1	-1	1	1	1	-1	-1	1	-1	-1	1	1	1	-1	1	-1	0	1	1	1	1	1	-1	-1	-1	-1	-1	-1	1	1	-1	-1	-1
binV14650000	V	14650015	-1	1	1	1	1	1	1	1	1	1	1	-1	-1	-1	-1	-1	1	1	1	-1	-1	1	-1	-1	1	1	1	-1	1	-1	0	1	1	1	1	1	-1	-1	-1	-1	-1	-1	1	1	-1	-1	-1
binV14810000	V	14810015	-1	1	1	1	1	1	1	1	1	1	1	-1	-1	-1	-1	-1	1	1	1	-1	-1	1	-1	-1	1	1	1	-1	1	-1	0	1	1	1	1	1	-1	-1	-1	-1	-1	-1	1	1	-1	-1	-1
binV14820000	V	14820015	-1	1	1	1	1	1	1	1	1	1	1	-1	-1	-1	-1	-1	1	1	1	-1	-1	1	-1	-1	1	1	1	-1	1	-1	0	1	1	1	1	1	-1	-1	-1	-1	-1	-1	1	1	-1	-1	-1
binV14880000	V	14880015	-1	1	1	1	1	1	1	1	1	1	1	-1	-1	-1	-1	-1	1	1	1	-1	-1	1	-1	-1	1	1	1	-1	1	-1	0	1	1	1	1	1	-1	-1	-1	-1	-1	-1	1	1	-1	-1	-1
binV14890000	V	14890015	-1	1	1	1	1	1	1	1	1	1	1	-1	-1	-1	-1	-1	1	1	1	-1	-1	1	-1	-1	1	1	1	-1	1	-1	0	1	1	1	1	1	-1	-1	-1	-1	-1	-1	1	1	-1	-1	-1
binV14910000	V	14910015	-1	1	1	1	1	1	1	1	1	1	1	-1	-1	-1	-1	-1	1	1	1	-1	-1	1	-1	-1	1	1	1	-1	1	-1	0	1	1	1	1	1	-1	-1	-1	-1	-1	-1	1	1	-1	-1	-1
binV14920000	V	14920015	-1	1	1	1	1	1	1	1	1	1	1	-1	-1	-1	-1	-1	1	1	1	-1	-1	1	-1	-1	1	1	1	-1	1	-1	0	1	1	1	1	1	-1	-1	-1	-1	-1	-1	1	1	-1	-1	-1
binV14950000	V	14950017	-1	1	1	1	1	1	1	1	1	1	1	-1	-1	-1	-1	-1	1	1	1	-1	-1	1	-1	-1	1	1	1	-1	1	-1	0	1	1	1	1	1	-1	-1	-1	-1	-1	-1	1	1	-1	-1	-1
binV14960000	V	14960017	-1	1	1	1	1	1	1	1	1	1	1	-1	-1	-1	-1	-1	1	1	1	-1	-1	1	-1	-1	1	1	1	-1	1	-1	0	1	1	1	1	1	-1	-1	-1	-1	-1	-1	1	1	-1	-1	-1
binV15050000	V	15050017	-1	1	1	1	1	1	1	1	1	1	1	-1	-1	-1	-1	-1	1	1	1	-1	-1	1	-1	-1	1	1	1	-1	1	-1	0	1	1	1	1	1	-1	-1	-1	-1	-1	-1	1	1	-1	-1	-1
binV15060000	V	15060017	-1	1	1	1	1	1	1	1	1	1	1	-1	-1	-1	-1	-1	1	1	1	-1	-1	1	-1	-1	1	1	1	-1	1	-1	0	1	1	1	1	1	-1	-1	-1	-1	-1	-1	1	1	-1	-1	-1
binV15610000	V	15610019	-1	1	1	1	1	1	1	1	1	1	1	-1	-1	-1	-1	-1	1	1	1	-1	-1	1	-1	-1	1	-1	1	-1	1	-1	0	1	1	1	1	1	-1	-1	-1	-1	-1	-1	1	1	-1	-1	-1
binV15620000	V	15620019	-1	1	1	1	1	1	1	1	1	1	1	-1	-1	-1	-1	-1	1	1	1	-1	-1	1	-1	-1	1	-1	1	-1	-1	-1	0	1	1	1	1	1	-1	-1	-1	-1	-1	-1	1	1	-1	-1	-1
binV16020000	V	16020020	-1	1	1	1	1	1	1	1	1	1	1	-1	-1	-1	-1	-1	1	1	1	-1	-1	1	-1	-1	1	-1	1	-1	-1	-1	0	1	1	1	1	1	-1	-1	-1	-1	-1	-1	1	1	-1	-1	-1
binV16030000	V	16030020	-1	1	1	1	1	1	1	1	1	1	1	-1	-1	-1	-1	-1	1	1	1	-1	-1	1	-1	-1	1	-1	1	-1	-1	-1	0	1	1	1	1	1	-1	-1	-1	-1	-1	-1	1	1	-1	-1	-1
binV16280000	V	16280020	-1	1	1	1	1	1	1	1	1	1	1	-1	-1	-1	-1	-1	1	1	1	-1	-1	1	-1	-1	1	-1	1	-1	-1	-1	0	1	1	1	1	1	-1	-1	-1	-1	-1	-1	1	1	-1	-1	-1
binV16290000	V	16290020	-1	1	1	1	1	1	1	1	1	1	1	-1	-1	-1	-1	-1	1	1	1	-1	-1	1	-1	-1	1	-1	1	-1	-1	-1	0	1	1	1	1	1	-1	-1	-1	-1	-1	-1	1	1	-1	-1	-1
binV16420000	V	16420020	-1	1	1	1	1	1	1	1	1	1	1	-1	-1	-1	-1	-1	1	1	1	-1	-1	1	-1	-1	1	-1	1	-1	-1	-1	0	1	1	1	1	1	-1	-1	-1	-1	-1	-1	1	1	-1	-1	-1
binV16430000	V	16430020	-1	1	1	1	1	1	1	1	1	1	1	-1	-1	-1	-1	-1	1	1	1	-1	-1	1	-1	-1	1	-1	1	-1	-1	-1	0	1	1	1	1	1	-1	-1	-1	-1	-1	-1	1	1	-1	-1	-1
binV16530000	V	16530021	-1	1	1	1	1	1	1	1	1	1	1	-1	-1	-1	-1	-1	1	1	1	-1	-1	1	-1	-1	1	-1	1	-1	-1	-1	0	1	1	1	1	1	-1	-1	-1	-1	-1	-1	1	1	-1	-1	-1
binV16540000	V	16540021	-1	1	1	1	1	1	1	1	1	1	1	-1	-1	-1	-1	-1	1	1	1	-1	-1	1	-1	-1	1	-1	1	-1	-1	-1	0	1	1	1	1	1	-1	-1	-1	-1	-1	-1	1	1	-1	-1	-1
binV17520000	V	17520026	-1	1	1	1	1	1	1	1	1	-1	1	-1	-1	-1	-1	-1	1	1	-1	-1	-1	1	-1	-1	1	-1	1	-1	-1	-1	0	1	1	1	1	1	-1	-1	-1	-1	-1	-1	1	1	-1	-1	-1
binV17530000	V	17530026	-1	1	1	1	1	1	1	1	1	-1	1	-1	-1	-1	-1	-1	1	1	-1	-1	-1	1	-1	-1	1	-1	1	-1	-1	-1	0	1	1	1	1	1	-1	-1	-1	-1	-1	-1	1	1	-1	-1	-1
binV17730000	V	17730026	-1	1	1	1	1	1	1	1	1	-1	1	-1	-1	-1	-1	-1	1	1	-1	-1	-1	1	-1	-1	1	-1	1	-1	-1	-1	0	1	1	1	1	1	-1	-1	-1	-1	-1	-1	1	1	-1	-1	-1
binV17740000	V	17740026	-1	1	1	1	1	1	1	1	1	-1	1	-1	-1	-1	-1	-1	1	1	-1	-1	-1	1	-1	-1	1	-1	1	-1	-1	-1	0	1	1	1	1	1	-1	-1	-1	-1	-1	1	1	1	-1	-1	-1
binV17960000	V	17960026	-1	1	1	1	1	1	1	1	1	-1	1	-1	-1	-1	-1	-1	1	1	-1	-1	-1	1	-1	-1	1	-1	1	-1	-1	-1	0	1	1	1	1	1	-1	-1	-1	-1	-1	1	1	1	-1	-1	-1
binV17970000	V	17970026	-1	1	1	1	1	1	1	1	1	-1	1	-1	-1	-1	-1	-1	1	1	-1	-1	-1	1	-1	-1	1	-1	1	-1	-1	-1	0	1	1	1	1	1	-1	-1	-1	-1	-1	1	1	1	-1	-1	-1
binV18030000	V	18030028	-1	1	1	1	1	1	1	1	1	-1	1	-1	-1	-1	-1	-1	1	1	-1	-1	-1	1	-1	-1	1	-1	1	-1	-1	-1	0	1	1	1	1	1	-1	-1	-1	-1	-1	1	1	1	-1	-1	-1
binV18040000	V	18040028	-1	1	1	1	1	1	1	1	1	-1	1	-1	-1	-1	-1	-1	1	1	-1	-1	-1	1	-1	-1	1	-1	1	-1	-1	-1	0	1	1	1	1	1	-1	-1	1	-1	-1	1	1	1	-1	-1	-1
binV18380000	V	18380028	-1	1	1	1	1	1	1	1	1	-1	1	-1	-1	-1	-1	-1	1	1	-1	-1	-1	1	-1	-1	1	-1	1	-1	-1	-1	0	1	1	1	1	1	-1	-1	1	-1	-1	1	1	1	-1	-1	-1
binV18390000	V	18390028	-1	1	1	1	1	1	1	1	1	-1	1	-1	-1	-1	-1	-1	1	1	-1	-1	-1	1	-1	-1	1	-1	1	-1	-1	-1	0	1	1	1	1	1	-1	-1	1	-1	-1	1	1	1	-1	-1	-1
binV18440000	V	18440028	-1	1	1	1	1	1	1	1	1	-1	1	-1	-1	-1	-1	-1	1	1	-1	-1	-1	1	-1	-1	1	-1	1	-1	-1	-1	0	1	1	1	1	1	-1	-1	1	-1	-1	1	1	1	-1	-1	-1
binV18450000	V	18450028	-1	1	1	1	1	1	1	1	1	-1	1	-1	-1	-1	-1	-1	1	1	-1	-1	-1	1	-1	-1	1	-1	1	-1	-1	-1	0	1	1	1	1	1	-1	-1	1	-1	-1	1	1	1	-1	-1	-1
binV18570000	V	18570028	-1	1	1	1	1	1	1	1	1	-1	1	-1	-1	-1	-1	-1	1	1	-1	-1	-1	1	-1	-1	1	-1	1	-1	-1	-1	0	1	1	1	1	1	-1	-1	1	-1	-1	1	1	1	-1	-1	-1
binV18580000	V	18580028	-1	1	1	1	1	1	1	1	1	-1	1	-1	-1	-1	-1	-1	1	1	-1	-1	-1	1	-1	-1	1	-1	1	-1	-1	-1	0	1	1	1	1	1	-1	-1	1	-1	-1	1	1	1	-1	-1	-1
binV18750000	V	18750028	-1	1	1	1	1	1	1	1	1	-1	1	-1	-1	-1	-1	-1	1	1	-1	-1	-1	1	-1	-1	1	-1	1	-1	-1	-1	0	1	1	1	1	1	-1	-1	1	-1	-1	1	1	1	-1	-1	-1
binV18760000	V	18760028	-1	1	1	1	1	1	1	1	1	-1	1	-1	-1	-1	-1	-1	1	1	-1	-1	-1	1	-1	-1	1	-1	1	-1	-1	-1	0	1	1	1	1	1	-1	-1	1	-1	-1	1	1	1	-1	-1	-1
binV18890000	V	18890029	-1	1	1	1	1	1	1	1	1	-1	1	-1	-1	-1	-1	-1	1	1	-1	-1	-1	1	-1	-1	1	-1	1	-1	-1	-1	0	1	1	1	1	1	-1	-1	1	-1	-1	1	1	1	-1	-1	-1
binV18900000	V	18900029	-1	1	1	1	1	1	1	1	1	-1	1	-1	-1	-1	-1	-1	1	1	-1	-1	-1	1	-1	-1	1	-1	1	-1	-1	-1	0	1	1	1	1	1	-1	-1	1	-1	-1	1	1	1	-1	-1	-1
binV18980000	V	18980029	-1	1	1	1	1	1	1	1	1	-1	1	-1	-1	-1	-1	-1	1	1	-1	-1	-1	1	-1	-1	1	-1	1	-1	-1	-1	0	1	1	1	1	1	-1	-1	1	-1	-1	1	1	1	-1	-1	-1
binV18990000	V	18990029	-1	1	1	1	1	1	1	1	1	-1	1	-1	-1	-1	-1	-1	1	1	-1	-1	-1	1	-1	-1	1	-1	1	-1	-1	-1	0	1	1	1	1	1	-1	-1	1	-1	-1	1	1	1	-1	-1	-1
binV19000000	V	19000029	-1	1	1	1	1	1	1	1	1	-1	1	-1	-1	-1	-1	-1	1	1	-1	-1	-1	1	-1	-1	1	-1	1	-1	-1	-1	0	1	1	1	1	1	-1	-1	1	-1	-1	1	1	1	-1	-1	-1
binV19120000	V	19120029	-1	1	1	1	1	1	1	1	1	-1	1	1	-1	-1	-1	-1	1	1	-1	-1	-1	1	-1	-1	1	-1	1	-1	-1	-1	0	1	1	1	1	1	-1	-1	1	-1	-1	1	1	1	-1	-1	-1
binV19130000	V	19130029	-1	1	1	1	1	1	1	1	1	-1	1	1	-1	-1	-1	-1	1	1	-1	-1	-1	1	-1	-1	1	-1	1	-1	-1	-1	0	1	1	1	1	1	-1	-1	1	-1	-1	1	1	1	-1	-1	-1
binV19140000	V	19140029	-1	1	1	1	1	1	1	1	1	-1	1	1	-1	-1	-1	-1	1	1	-1	-1	-1	1	-1	-1	1	-1	1	-1	-1	-1	0	1	1	1	1	1	-1	-1	1	-1	-1	1	1	1	-1	-1	-1
binV19150000	V	19150029	-1	1	1	1	1	1	1	1	1	-1	1	1	-1	-1	-1	-1	1	1	-1	-1	-1	1	-1	-1	1	-1	1	-1	-1	-1	0	1	1	1	1	1	-1	-1	1	-1	-1	1	1	1	-1	-1	-1
binV19160000	V	19160029	-1	1	1	1	1	1	1	1	1	-1	1	1	-1	-1	-1	-1	1	1	-1	-1	-1	1	-1	-1	1	-1	1	-1	-1	-1	0	1	1	1	1	1	-1	-1	1	-1	-1	1	1	1	-1	-1	-1
binV19170000	V	19170029	-1	1	1	1	1	1	1	1	1	-1	1	1	-1	-1	-1	-1	1	1	-1	-1	-1	1	-1	-1	1	-1	1	-1	-1	-1	0	1	1	1	1	1	-1	-1	-1	-1	-1	1	1	1	-1	-1	-1
binV19230000	V	19230029	-1	1	1	1	1	1	1	1	1	-1	1	1	-1	-1	-1	-1	1	1	-1	-1	-1	1	-1	-1	1	-1	1	-1	-1	-1	0	1	1	1	1	1	-1	-1	-1	-1	-1	1	1	1	-1	-1	-1
binV19240000	V	19240029	-1	1	1	1	1	1	1	1	1	-1	1	1	-1	-1	-1	-1	1	1	-1	-1	-1	1	-1	-1	1	-1	1	-1	-1	-1	0	1	1	1	1	1	-1	-1	-1	-1	-1	1	1	1	-1	-1	-1
binV19670000	V	19670030	-1	1	1	1	1	1	1	1	1	-1	1	1	-1	-1	-1	-1	1	1	-1	-1	-1	1	-1	-1	1	-1	1	-1	-1	-1	0	1	1	1	1	1	-1	-1	-1	-1	-1	1	1	1	-1	-1	-1
binV19680000	V	19680030	-1	1	1	1	1	1	1	1	1	-1	1	1	-1	-1	-1	-1	1	1	-1	-1	-1	1	-1	-1	1	-1	1	-1	-1	-1	0	1	1	1	1	1	-1	-1	-1	-1	-1	1	1	1	-1	-1	-1
binV20030000	V	20030031	-1	1	1	1	1	1	1	1	1	-1	1	1	-1	-1	-1	-1	1	1	-1	-1	-1	1	-1	-1	1	-1	1	-1	-1	-1	0	1	1	1	1	1	-1	-1	-1	-1	-1	1	1	1	-1	-1	-1
binV20040000	V	20040031	-1	1	1	1	1	1	1	1	1	-1	1	1	-1	-1	-1	-1	1	1	-1	-1	-1	1	-1	-1	1	-1	1	-1	-1	-1	0	1	1	1	1	1	-1	-1	-1	-1	-1	1	1	1	-1	-1	-1
binV20924149	V	20924180	-1	1	1	1	1	1	1	1	1	-1	1	1	-1	-1	-1	-1	1	1	-1	-1	-1	1	-1	-1	1	-1	1	-1	-1	-1	0	1	1	1	1	1	-1	-1	-1	-1	-1	1	1	1	-1	-1	-1
binX10000	X	10000	-1	1	1	1	1	1	1	1	1	1	1	1	-1	1	1	1	1	-1	1	-1	1	-1	-1	1	1	1	-1	1	1	-1	0	-1	1	1	-1	-1	1	-1	-1	-1	-1	1	1	-1	-1	-1	1
binX410000	X	409999	-1	1	1	1	1	1	1	1	1	1	1	1	-1	1	1	1	1	-1	1	-1	1	-1	-1	1	1	1	-1	1	1	-1	0	-1	1	1	-1	-1	1	-1	-1	-1	-1	1	1	-1	-1	-1	1
binX420000	X	419999	-1	1	1	1	1	1	1	1	1	1	1	1	-1	1	1	1	1	-1	1	-1	1	-1	-1	1	1	1	-1	1	1	-1	0	-1	1	1	-1	-1	1	-1	-1	-1	-1	1	1	-1	-1	-1	1
binX670000	X	670001	-1	1	1	1	1	1	1	1	1	1	1	1	-1	1	1	1	1	-1	1	-1	1	-1	-1	1	1	1	-1	1	1	-1	0	-1	1	1	-1	-1	1	-1	-1	-1	-1	1	1	-1	-1	-1	1
binX680000	X	680001	-1	1	1	1	1	1	1	1	1	1	1	1	-1	1	1	1	1	-1	1	-1	1	-1	-1	1	1	1	-1	1	1	-1	0	-1	1	1	-1	-1	1	-1	-1	-1	-1	1	1	-1	-1	-1	1
binX1000000	X	1000003	-1	1	1	1	1	1	1	1	1	1	1	1	-1	1	1	1	1	-1	1	-1	1	-1	-1	1	1	1	-1	1	1	-1	0	-1	1	1	-1	-1	1	-1	-1	-1	-1	1	1	-1	-1	-1	1
binX1010000	X	1010003	-1	1	1	1	1	1	1	1	1	1	1	1	-1	1	1	1	1	-1	1	-1	1	-1	-1	1	1	1	-1	1	1	-1	0	-1	1	1	-1	-1	1	-1	-1	-1	-1	1	1	-1	-1	-1	1
binX1130000	X	1130003	-1	1	1	1	1	1	1	1	1	1	1	1	-1	1	1	1	1	-1	1	-1	1	-1	-1	1	1	1	-1	1	1	-1	0	-1	1	1	-1	-1	1	-1	-1	-1	1	1	1	-1	-1	-1	1
binX1140000	X	1140003	-1	1	1	1	1	1	1	1	1	1	1	1	-1	1	1	1	1	-1	1	-1	1	-1	-1	1	1	1	-1	1	1	-1	0	-1	1	1	-1	-1	1	-1	-1	-1	1	1	1	-1	-1	-1	1
binX1240000	X	1240005	-1	1	1	1	1	1	1	1	1	1	1	1	-1	1	1	1	1	-1	1	-1	1	-1	-1	1	1	1	-1	1	1	-1	0	-1	1	1	-1	-1	1	-1	-1	-1	1	1	1	-1	-1	-1	1
binX1250000	X	1250005	-1	1	1	1	1	1	1	1	1	1	1	1	-1	1	1	1	1	-1	1	-1	1	-1	-1	1	1	1	-1	1	1	-1	0	-1	1	1	-1	-1	1	-1	-1	-1	1	1	1	-1	-1	-1	1
binX1610000	X	1610005	-1	1	1	1	1	1	1	1	1	1	1	1	-1	1	1	1	1	-1	1	-1	1	-1	-1	1	1	1	-1	1	1	-1	0	-1	1	1	-1	-1	1	-1	-1	-1	1	1	1	-1	-1	-1	1
binX1620000	X	1620005	-1	1	1	1	1	1	1	1	1	1	1	1	-1	1	1	1	1	-1	1	-1	1	-1	-1	1	1	1	-1	1	1	-1	0	-1	1	1	-1	-1	1	-1	1	-1	1	1	1	-1	-1	-1	1
binX1640000	X	1640005	-1	1	1	1	1	1	1	1	1	1	1	1	-1	1	1	1	1	-1	1	-1	1	-1	-1	1	1	1	-1	1	1	-1	0	-1	1	1	-1	-1	1	-1	1	-1	1	1	1	-1	-1	-1	1
binX1650000	X	1650005	-1	1	1	1	1	1	1	1	1	1	1	1	-1	1	1	1	1	-1	1	-1	1	-1	-1	1	1	1	-1	1	1	-1	0	-1	1	1	-1	-1	1	-1	1	-1	1	1	1	-1	-1	-1	1
binX1710000	X	1710005	-1	1	1	1	1	1	1	1	1	1	1	1	-1	1	1	1	1	-1	1	-1	1	-1	-1	1	1	1	-1	1	1	-1	0	-1	1	1	-1	-1	1	-1	1	-1	1	1	1	-1	-1	-1	1
binX1720000	X	1720005	-1	1	1	1	1	1	1	1	1	1	1	1	-1	1	1	1	1	-1	1	-1	-1	-1	-1	1	1	1	-1	1	1	-1	0	-1	1	1	-1	-1	1	-1	1	-1	1	1	1	-1	-1	-1	1
binX1800000	X	1800005	-1	1	1	1	1	1	1	1	1	1	1	1	-1	1	1	1	1	-1	1	-1	-1	-1	-1	1	1	1	-1	1	1	-1	0	-1	1	1	-1	-1	1	-1	1	-1	1	1	1	-1	-1	-1	1
binX1810000	X	1810006	-1	1	1	1	1	1	1	1	1	1	1	1	-1	1	1	1	1	-1	1	-1	-1	-1	-1	1	1	1	-1	1	1	-1	0	-1	1	1	-1	-1	1	-1	1	-1	1	1	1	-1	-1	-1	1
binX2010000	X	2010006	-1	1	1	1	1	1	1	1	1	1	1	1	-1	1	1	1	-1	-1	1	-1	-1	-1	-1	1	1	1	-1	1	1	-1	0	-1	1	1	-1	1	-1	-1	1	-1	-1	1	1	-1	-1	-1	1
binX2020000	X	2020006	-1	1	1	1	1	1	1	1	1	1	1	1	-1	1	1	1	-1	-1	1	-1	-1	-1	-1	1	1	1	-1	1	1	-1	0	-1	1	1	-1	1	-1	-1	1	-1	-1	1	1	-1	-1	-1	1
binX2180000	X	2180007	-1	1	1	1	1	1	1	1	1	1	1	1	-1	1	1	1	-1	-1	1	-1	-1	-1	-1	1	1	1	-1	1	1	-1	0	-1	1	1	-1	1	-1	-1	1	-1	-1	1	1	-1	-1	-1	1
binX2190000	X	2190007	-1	1	1	1	1	1	1	1	1	1	1	1	-1	1	1	1	-1	-1	1	-1	-1	-1	-1	1	1	1	-1	1	1	-1	0	-1	1	1	-1	1	-1	-1	1	-1	-1	1	1	-1	-1	-1	1
binX2450000	X	2450008	-1	1	1	1	1	1	1	1	1	1	1	1	-1	1	1	1	-1	-1	1	-1	-1	-1	-1	1	1	1	-1	1	1	-1	0	-1	1	1	-1	1	-1	-1	1	-1	-1	1	1	-1	-1	-1	1
binX2460000	X	2460008	-1	1	1	1	1	1	1	1	1	1	1	1	-1	1	1	1	-1	-1	1	-1	-1	-1	-1	1	1	1	-1	1	1	-1	0	-1	1	1	-1	1	-1	-1	1	-1	-1	1	1	-1	-1	-1	1
binX2560000	X	2560007	-1	1	1	1	1	1	1	1	1	1	1	1	-1	1	1	1	-1	-1	1	-1	-1	-1	-1	1	1	1	-1	1	1	-1	0	-1	1	1	-1	1	-1	-1	1	-1	-1	1	1	-1	-1	-1	1
binX2570000	X	2570007	-1	1	1	1	1	1	1	1	1	1	1	1	-1	1	1	1	-1	-1	1	-1	-1	-1	-1	1	1	1	-1	1	1	-1	0	-1	1	1	-1	1	-1	-1	1	-1	-1	1	1	-1	-1	-1	1
binX2720000	X	2720007	-1	1	1	1	1	1	1	1	1	1	1	1	-1	1	1	1	-1	-1	1	-1	-1	-1	-1	1	1	1	-1	1	1	-1	0	-1	1	1	-1	1	-1	-1	1	-1	-1	1	1	-1	-1	-1	1
binX2730000	X	2730007	-1	1	1	1	1	1	1	1	1	1	1	1	-1	1	1	1	-1	-1	1	-1	-1	-1	-1	1	1	1	-1	1	1	-1	0	-1	1	1	-1	1	-1	-1	1	-1	-1	1	1	-1	-1	-1	1
binX2850000	X	2850008	-1	1	1	1	1	1	1	1	1	1	1	1	-1	1	1	1	-1	-1	1	-1	-1	-1	-1	1	1	1	-1	1	1	-1	0	-1	1	1	-1	1	-1	-1	1	-1	-1	1	1	-1	-1	-1	1
binX2860000	X	2860008	-1	1	1	1	1	1	1	1	1	1	1	1	1	1	1	1	-1	-1	1	-1	-1	-1	-1	1	1	1	-1	1	1	-1	0	-1	1	1	1	1	-1	-1	1	-1	-1	1	1	-1	-1	-1	1
binX3020000	X	3020010	-1	1	1	1	1	1	1	1	1	1	1	1	1	1	1	1	-1	-1	1	-1	-1	-1	-1	1	1	1	-1	1	1	-1	0	-1	1	1	1	1	-1	-1	1	-1	-1	1	1	-1	-1	-1	1
binX3030000	X	3030010	-1	1	1	1	1	1	1	1	1	1	1	1	1	1	1	1	-1	-1	1	-1	-1	-1	-1	1	1	1	-1	1	1	-1	0	-1	1	1	1	1	-1	-1	1	-1	-1	1	1	-1	-1	-1	1
binX3820000	X	3820019	-1	1	1	1	1	1	1	1	1	1	1	1	1	1	1	1	-1	-1	1	-1	-1	1	-1	1	1	1	-1	1	1	-1	0	-1	-1	1	1	1	-1	-1	1	-1	-1	1	1	-1	-1	-1	1
binX3830000	X	3830019	-1	1	1	1	1	1	1	1	1	1	1	1	1	1	1	1	-1	-1	1	-1	-1	1	-1	1	1	1	-1	1	1	-1	0	-1	-1	1	1	1	-1	-1	1	-1	-1	1	1	-1	-1	-1	1
binX4140000	X	4140024	-1	1	1	1	1	1	1	1	1	1	1	1	1	1	1	1	-1	-1	1	-1	-1	1	-1	1	1	1	-1	1	1	-1	0	-1	-1	1	1	1	-1	-1	1	-1	-1	1	1	-1	-1	-1	1
binX4150000	X	4150024	-1	1	1	1	1	1	1	1	1	1	1	1	1	1	1	1	-1	-1	1	-1	-1	1	-1	1	1	1	-1	1	1	-1	0	-1	-1	1	1	1	-1	-1	1	-1	-1	1	1	-1	-1	-1	1
binX4780000	X	4780030	-1	1	1	1	1	1	1	1	1	1	1	1	1	1	1	1	-1	-1	1	-1	-1	1	-1	1	1	1	-1	1	1	-1	0	-1	-1	1	1	1	-1	-1	1	-1	1	1	1	-1	-1	-1	1
binX4790000	X	4790030	-1	1	1	1	1	1	1	1	1	1	1	1	1	1	1	1	-1	-1	1	-1	-1	1	-1	1	1	1	-1	1	1	-1	0	-1	-1	1	1	1	-1	-1	1	-1	1	1	1	-1	-1	-1	1
binX4880000	X	4880030	-1	1	1	1	1	1	1	1	1	1	1	1	1	1	1	1	-1	-1	1	-1	-1	1	-1	1	1	1	-1	1	1	-1	0	-1	-1	1	1	1	-1	-1	1	-1	1	1	1	-1	-1	-1	1
binX4890000	X	4890030	-1	1	1	1	1	1	1	1	1	1	1	1	1	1	1	1	-1	-1	1	-1	-1	1	-1	1	1	1	-1	1	1	-1	0	-1	-1	1	1	1	-1	-1	1	-1	1	1	1	-1	-1	-1	1
binX5730000	X	5730035	-1	1	1	1	1	1	1	1	1	1	1	1	1	1	1	1	-1	-1	1	-1	-1	1	-1	1	1	1	-1	1	1	-1	0	1	-1	1	1	1	-1	-1	1	-1	1	1	1	-1	-1	-1	1
binX5740000	X	5740035	-1	1	1	1	1	1	1	1	1	1	1	1	1	1	1	1	-1	-1	1	-1	-1	1	-1	1	1	1	-1	1	1	-1	0	1	-1	1	1	1	-1	-1	1	-1	1	1	1	-1	-1	-1	1
binX5810000	X	5810035	-1	1	1	1	1	1	1	1	1	1	1	1	1	1	1	1	-1	-1	1	-1	-1	1	-1	1	1	1	-1	1	1	-1	0	1	-1	1	1	1	-1	-1	1	-1	1	1	1	-1	-1	-1	1
binX5820000	X	5820035	-1	1	1	1	1	1	1	1	1	1	1	1	1	1	1	1	-1	-1	1	-1	-1	1	-1	1	1	1	-1	1	1	-1	0	1	-1	1	1	1	-1	-1	1	-1	1	1	1	-1	-1	-1	1
binX6000000	X	6000035	-1	1	1	1	1	1	1	1	1	1	1	1	1	1	1	1	-1	-1	1	-1	-1	1	-1	1	1	1	-1	1	1	-1	0	1	-1	1	1	1	-1	-1	1	-1	1	1	1	-1	-1	-1	1
binX6010000	X	6010035	-1	1	1	1	1	1	1	1	1	1	1	1	1	1	1	1	-1	-1	1	-1	-1	1	-1	1	1	1	-1	1	1	-1	0	1	-1	1	1	1	-1	-1	1	-1	1	1	1	-1	-1	-1	1
binX6350000	X	6350036	-1	1	1	1	1	1	1	1	1	1	1	1	1	1	1	1	-1	-1	1	-1	-1	1	-1	1	1	1	-1	1	1	-1	0	1	-1	1	1	1	-1	-1	1	-1	1	1	1	-1	-1	-1	1
binX6360000	X	6360036	-1	1	1	1	1	1	1	1	1	1	1	1	1	1	1	1	-1	-1	1	-1	-1	1	-1	1	1	1	-1	1	1	-1	0	1	-1	1	1	1	-1	-1	1	-1	1	1	1	-1	-1	-1	1
binX6890000	X	6890040	-1	1	1	1	1	1	1	1	-1	1	1	1	1	1	1	1	-1	-1	1	-1	-1	-1	-1	1	1	-1	-1	1	1	-1	0	1	-1	1	1	1	-1	-1	1	-1	1	1	1	-1	-1	-1	1
binX6900000	X	6900040	-1	1	1	1	1	1	1	1	-1	1	1	1	1	1	1	1	-1	-1	1	-1	-1	-1	-1	1	1	-1	-1	1	1	-1	0	1	-1	1	1	1	-1	-1	1	-1	1	1	1	-1	-1	-1	1
binX8460000	X	8460053	-1	1	1	1	1	1	1	1	-1	1	1	-1	1	1	1	1	-1	-1	1	-1	-1	1	-1	1	1	-1	-1	1	1	-1	0	-1	-1	1	1	1	-1	-1	1	-1	1	1	1	-1	-1	-1	1
binX8470000	X	8470053	-1	1	1	1	1	1	1	1	-1	1	1	-1	1	1	1	1	-1	-1	1	-1	-1	1	-1	1	1	-1	-1	1	1	-1	0	-1	-1	1	1	1	-1	-1	1	-1	1	1	1	-1	-1	-1	1
binX8630000	X	8630053	-1	1	1	1	1	1	1	1	-1	1	1	-1	1	1	1	1	-1	-1	1	-1	-1	1	-1	1	1	-1	-1	1	1	-1	0	-1	-1	1	1	1	-1	-1	1	-1	1	1	1	-1	-1	-1	1
binX8640000	X	8640052	-1	1	1	1	1	1	1	1	-1	1	1	-1	1	1	1	1	-1	-1	1	-1	-1	1	-1	1	1	-1	-1	1	1	-1	0	-1	-1	1	1	1	-1	-1	1	-1	1	1	1	-1	-1	-1	1
binX8650000	X	8650052	-1	1	1	1	1	1	1	1	-1	1	1	-1	1	1	1	1	-1	-1	1	-1	-1	1	-1	1	1	-1	-1	1	1	-1	0	-1	-1	1	1	1	-1	-1	1	-1	1	1	1	-1	-1	-1	1
binX8660000	X	8660052	-1	1	1	1	1	1	1	1	-1	1	1	-1	1	1	1	1	-1	-1	1	-1	-1	1	-1	1	1	-1	-1	1	1	-1	0	-1	-1	1	1	1	-1	-1	1	-1	1	1	1	-1	-1	-1	1
binX8880000	X	8880053	-1	1	1	1	1	1	1	1	-1	1	1	-1	1	1	1	1	-1	-1	1	-1	-1	1	-1	1	1	-1	-1	1	1	-1	0	-1	-1	1	1	1	-1	-1	1	-1	1	1	1	-1	-1	-1	1
binX8890000	X	8890053	-1	1	1	1	1	1	1	1	-1	1	1	-1	1	1	1	1	-1	-1	1	-1	-1	1	-1	1	1	-1	-1	1	1	-1	0	-1	-1	1	1	1	-1	-1	1	-1	1	1	1	-1	-1	-1	1
binX9080000	X	9080056	-1	1	1	1	1	1	1	1	-1	1	1	-1	1	1	1	1	-1	-1	1	-1	-1	1	-1	1	1	-1	1	1	1	-1	0	-1	-1	1	1	1	-1	-1	1	-1	1	1	1	-1	-1	-1	1
binX9090000	X	9090056	-1	1	1	1	1	1	1	1	-1	1	1	-1	1	1	1	1	-1	-1	1	-1	-1	1	-1	1	1	-1	1	1	1	-1	0	-1	-1	1	1	1	-1	-1	1	-1	1	1	1	-1	-1	-1	1
binX9100000	X	9100056	-1	1	1	1	1	1	1	1	-1	1	1	-1	1	1	1	1	-1	-1	1	-1	-1	1	-1	1	1	-1	1	1	1	-1	0	-1	-1	1	1	1	-1	-1	1	-1	1	1	1	-1	-1	-1	1
binX9280000	X	9280059	-1	1	1	1	1	1	1	1	-1	1	1	-1	1	1	1	1	-1	-1	1	-1	-1	1	-1	1	1	-1	1	1	1	-1	0	-1	-1	1	1	1	-1	-1	1	-1	1	1	1	-1	-1	-1	1
binX9290000	X	9290059	-1	1	1	1	1	1	1	1	-1	1	1	-1	1	1	1	1	-1	-1	1	-1	-1	1	-1	1	1	-1	1	1	1	-1	0	-1	-1	1	1	1	-1	-1	1	-1	1	1	1	-1	-1	-1	1
binX10120000	X	10120059	-1	1	1	1	1	1	1	1	-1	1	1	-1	1	1	1	1	-1	-1	1	-1	-1	1	-1	1	1	1	1	1	1	-1	0	-1	-1	1	1	1	-1	-1	1	1	1	1	1	-1	-1	-1	1
binX10130000	X	10130059	-1	1	1	1	1	1	1	1	-1	1	1	-1	1	1	1	1	-1	-1	1	-1	-1	1	-1	1	1	1	1	1	1	-1	0	-1	-1	1	1	1	-1	-1	1	1	1	-1	1	-1	-1	-1	1
binX10340000	X	10340060	-1	1	1	1	1	1	1	1	-1	1	1	-1	1	1	1	1	-1	-1	1	-1	-1	1	-1	1	1	1	1	1	1	-1	0	-1	-1	1	1	1	-1	-1	1	1	1	-1	1	-1	-1	-1	1
binX10350000	X	10350060	-1	1	1	1	1	1	1	1	-1	1	1	-1	1	1	1	1	-1	-1	1	-1	-1	1	-1	1	1	1	1	1	1	-1	0	-1	-1	1	1	1	-1	-1	1	1	1	-1	1	-1	-1	-1	1
binX10940000	X	10940066	-1	1	1	1	1	1	1	1	-1	-1	1	-1	1	1	1	1	-1	-1	1	-1	-1	1	-1	1	1	1	1	1	1	-1	0	-1	-1	1	-1	1	-1	-1	1	1	1	-1	1	-1	-1	-1	1
binX10950000	X	10950066	-1	1	1	1	1	1	1	1	-1	-1	1	-1	1	1	1	1	-1	-1	1	-1	-1	1	-1	1	1	1	1	1	1	-1	0	-1	-1	1	-1	1	-1	-1	1	1	1	-1	1	-1	-1	-1	1
binX11020000	X	11020066	-1	1	1	1	1	1	1	1	-1	-1	1	-1	1	1	1	1	-1	-1	1	-1	-1	1	-1	1	1	1	1	1	1	-1	0	-1	-1	1	-1	1	-1	-1	1	1	1	-1	1	-1	-1	-1	1
binX11030000	X	11030066	-1	1	1	1	1	1	1	1	-1	-1	1	-1	1	1	1	1	-1	-1	1	-1	-1	1	-1	1	1	1	1	1	1	-1	0	-1	-1	1	-1	1	-1	-1	1	1	1	-1	1	-1	-1	-1	1
binX11380000	X	11380064	-1	1	1	1	1	1	1	1	-1	-1	1	-1	1	1	1	1	-1	-1	1	-1	-1	1	-1	1	1	1	1	1	1	-1	0	-1	-1	1	-1	1	-1	-1	1	1	1	-1	1	-1	-1	-1	1
binX11390000	X	11390064	-1	1	1	1	1	1	1	1	-1	-1	1	-1	1	1	1	1	-1	-1	1	-1	-1	1	-1	1	1	1	1	1	1	-1	0	-1	-1	1	-1	1	-1	-1	1	1	1	-1	1	-1	-1	-1	1
binX12430000	X	12430067	-1	1	1	1	1	1	1	1	-1	-1	1	-1	1	1	1	1	-1	-1	1	-1	-1	1	-1	1	1	1	1	1	1	-1	0	-1	-1	-1	-1	1	1	-1	1	1	1	-1	1	-1	-1	-1	1
binX12440000	X	12440067	-1	1	1	1	1	1	1	1	-1	-1	1	-1	1	1	1	1	-1	-1	1	-1	-1	1	-1	1	1	1	1	1	1	-1	0	-1	-1	-1	-1	1	1	-1	1	1	1	-1	1	-1	-1	-1	1
binX12560000	X	12560069	-1	1	1	1	1	1	1	1	-1	-1	1	-1	1	1	1	1	-1	-1	1	-1	-1	1	-1	1	1	1	1	1	1	-1	0	-1	-1	1	-1	1	1	-1	1	1	1	-1	1	-1	-1	-1	1
binX12570000	X	12570069	-1	1	1	1	1	1	1	1	-1	-1	1	-1	1	1	1	1	-1	-1	1	-1	-1	1	-1	1	1	1	1	1	1	-1	0	-1	-1	1	-1	1	1	-1	1	1	1	-1	1	-1	-1	-1	1
binX12680000	X	12680072	-1	1	1	1	1	1	1	1	-1	-1	1	-1	1	1	1	1	-1	-1	1	-1	-1	1	-1	1	1	1	1	1	1	-1	0	-1	-1	1	-1	1	1	-1	1	1	1	-1	1	-1	-1	-1	1
binX12690000	X	12690072	-1	1	1	1	1	1	1	1	-1	-1	1	-1	1	1	1	1	-1	-1	1	-1	-1	1	-1	1	1	1	1	1	1	-1	0	-1	-1	1	-1	1	1	-1	1	1	1	-1	1	-1	-1	-1	1
binX12760000	X	12760070	-1	1	1	1	1	1	1	1	-1	-1	1	-1	1	1	1	1	-1	-1	1	-1	-1	1	-1	1	1	1	1	1	1	-1	0	-1	-1	1	-1	1	1	-1	1	1	1	-1	1	-1	-1	-1	1
binX12770000	X	12770070	-1	1	1	1	1	1	1	1	-1	-1	1	-1	1	1	1	1	-1	-1	1	-1	-1	1	-1	1	1	1	1	1	1	-1	0	-1	-1	1	-1	1	1	-1	1	1	1	-1	1	-1	-1	-1	1
binX12810000	X	12810070	-1	1	1	1	1	1	1	1	-1	-1	1	-1	1	1	1	1	-1	-1	1	-1	-1	1	-1	1	1	1	1	1	1	-1	0	-1	-1	1	-1	1	1	-1	1	1	1	-1	1	-1	-1	-1	1
binX12820000	X	12820070	-1	1	1	1	1	1	1	1	-1	-1	1	-1	1	1	1	1	-1	-1	1	-1	-1	1	-1	1	1	1	1	1	1	-1	0	-1	-1	1	-1	1	1	-1	1	1	1	-1	1	-1	-1	-1	1
binX13050000	X	13050069	-1	1	1	1	1	1	1	1	-1	-1	1	-1	1	1	1	1	-1	-1	1	-1	-1	1	-1	1	1	1	1	1	1	-1	0	-1	-1	1	-1	1	1	-1	1	1	1	-1	1	-1	-1	-1	1
binX13060000	X	13060069	-1	1	1	1	1	1	1	1	-1	-1	1	-1	1	1	1	1	-1	-1	1	-1	-1	1	-1	1	1	1	1	1	1	-1	0	-1	-1	1	-1	1	1	-1	1	1	1	-1	1	-1	-1	-1	1
binX13210000	X	13210069	-1	1	1	1	1	1	1	1	-1	-1	1	-1	1	1	1	1	-1	-1	1	-1	-1	1	-1	1	1	1	1	1	1	-1	0	-1	-1	1	-1	1	1	-1	1	1	1	-1	1	-1	-1	-1	1
binX13220000	X	13220069	-1	1	1	1	1	1	1	1	-1	-1	1	-1	1	1	1	1	-1	-1	1	-1	-1	1	-1	1	1	1	1	1	1	-1	0	-1	-1	1	-1	1	1	-1	1	1	1	-1	1	-1	-1	-1	1
binX13240000	X	13240069	-1	1	1	1	1	1	1	1	-1	-1	1	-1	1	1	1	1	-1	-1	1	-1	-1	1	-1	1	1	1	1	1	1	-1	0	-1	-1	1	-1	1	1	-1	1	1	1	-1	1	-1	-1	-1	1
binX13250000	X	13250069	-1	1	1	1	1	1	1	1	-1	-1	1	-1	1	1	1	1	-1	-1	1	-1	-1	1	-1	1	1	1	1	1	1	-1	0	-1	-1	1	-1	1	1	-1	1	1	1	-1	1	-1	-1	-1	1
binX13390000	X	13390068	-1	1	1	1	1	1	1	1	-1	-1	1	-1	1	1	1	1	-1	-1	1	-1	-1	1	-1	1	1	1	1	1	1	-1	0	-1	-1	1	-1	1	1	-1	1	1	1	-1	1	-1	-1	-1	1
binX13400000	X	13400067	-1	1	1	1	1	1	1	1	-1	-1	1	-1	1	1	1	1	-1	-1	1	-1	-1	1	-1	-1	-1	-1	1	1	1	-1	0	-1	-1	1	-1	1	1	-1	1	1	1	-1	1	-1	-1	-1	1
binX13480000	X	13480068	-1	1	1	1	1	1	1	1	-1	-1	1	-1	1	1	1	1	-1	-1	1	-1	-1	1	-1	-1	-1	-1	1	1	1	-1	0	-1	-1	1	-1	1	1	-1	1	1	1	-1	1	-1	-1	-1	1
binX13490000	X	13490070	-1	1	1	1	1	1	1	1	-1	-1	1	-1	1	1	1	1	-1	-1	1	-1	-1	1	-1	-1	-1	-1	1	1	1	-1	0	-1	-1	1	-1	1	1	-1	1	1	1	-1	1	-1	-1	-1	1
binX13510000	X	13510070	-1	1	1	1	1	1	1	1	-1	-1	1	-1	1	1	1	1	-1	-1	1	-1	-1	1	-1	-1	-1	-1	1	1	1	-1	0	-1	-1	1	-1	1	1	-1	1	1	1	-1	1	-1	-1	-1	1
binX13520000	X	13520070	-1	1	1	1	1	1	1	1	-1	-1	1	-1	1	1	1	1	-1	-1	1	-1	-1	1	-1	-1	-1	-1	1	1	1	-1	0	-1	-1	1	-1	1	1	-1	1	1	1	-1	1	-1	-1	-1	1
binX13640000	X	13640070	-1	1	1	1	1	1	1	1	-1	-1	1	-1	1	1	1	1	-1	-1	1	-1	-1	1	-1	-1	-1	-1	1	1	1	-1	0	-1	-1	1	-1	1	1	-1	1	1	1	-1	1	-1	-1	-1	1
binX13650000	X	13650070	-1	1	1	1	1	1	1	1	-1	-1	1	-1	1	1	1	1	-1	-1	1	-1	-1	1	-1	-1	-1	-1	1	1	1	-1	0	-1	-1	1	-1	1	1	-1	1	1	1	-1	1	-1	-1	-1	1
binX13940000	X	13940069	-1	1	1	1	1	1	1	1	-1	-1	1	-1	1	1	1	1	-1	-1	1	-1	-1	1	-1	-1	-1	-1	1	1	1	-1	0	-1	-1	1	-1	1	1	-1	1	1	1	-1	1	-1	-1	-1	1
binX13950000	X	13950069	-1	1	1	1	1	1	1	1	-1	-1	1	-1	1	1	1	1	-1	-1	1	-1	-1	1	-1	-1	-1	-1	1	1	1	-1	0	-1	-1	1	-1	1	1	-1	1	1	1	-1	1	-1	-1	-1	1
binX13960000	X	13960069	-1	1	1	1	1	1	1	1	-1	-1	1	-1	1	1	1	1	-1	-1	1	-1	-1	1	-1	-1	-1	-1	1	1	1	-1	0	-1	-1	1	-1	1	1	-1	1	1	1	-1	1	-1	-1	-1	1
binX14020000	X	14020069	-1	1	1	1	1	1	1	1	-1	-1	1	-1	1	1	1	1	-1	-1	1	-1	-1	1	-1	-1	-1	-1	1	1	1	-1	0	-1	-1	1	-1	1	1	-1	1	1	1	-1	1	-1	-1	-1	1
binX14030000	X	14030069	-1	1	1	1	1	1	1	1	-1	-1	1	-1	1	1	1	1	-1	-1	1	-1	-1	1	-1	-1	-1	-1	1	1	1	-1	0	-1	-1	1	-1	1	1	-1	1	1	1	-1	1	-1	-1	-1	1
binX14230000	X	14230069	-1	1	1	1	1	1	1	1	-1	-1	1	-1	1	1	1	1	-1	-1	1	-1	-1	1	-1	-1	-1	-1	1	1	1	-1	0	-1	-1	1	-1	1	1	-1	1	1	1	-1	1	-1	-1	-1	1
binX14240000	X	14240069	-1	1	1	1	1	1	1	1	-1	-1	1	-1	1	1	1	1	-1	-1	1	-1	-1	1	-1	-1	-1	-1	1	1	1	-1	0	-1	-1	1	-1	1	1	-1	1	1	1	-1	1	-1	-1	-1	1
binX14380000	X	14380070	-1	1	1	1	1	1	1	1	-1	-1	1	-1	1	1	1	-1	-1	-1	1	-1	-1	1	-1	1	-1	-1	1	1	1	-1	0	-1	-1	1	-1	1	1	-1	1	1	1	-1	1	1	-1	-1	1
binX14390000	X	14390070	-1	1	1	1	1	1	1	1	-1	-1	1	-1	1	1	1	-1	-1	-1	1	-1	-1	1	-1	1	-1	-1	1	1	1	-1	0	-1	-1	1	-1	1	1	-1	1	1	1	-1	1	1	-1	-1	1
binX14490000	X	14490070	-1	1	1	1	1	1	1	1	-1	-1	1	-1	1	1	1	-1	-1	-1	1	-1	-1	1	-1	1	-1	-1	1	1	1	-1	0	-1	-1	1	-1	1	1	-1	1	1	1	-1	1	1	-1	-1	1
binX14500000	X	14500070	-1	1	1	1	1	1	1	1	-1	-1	1	-1	1	1	1	-1	-1	-1	1	-1	-1	1	-1	1	-1	-1	1	1	1	-1	0	-1	-1	1	-1	1	1	-1	1	1	1	-1	1	1	-1	-1	1
binX14690000	X	14690069	-1	1	1	1	1	1	1	1	-1	-1	1	-1	1	1	1	-1	-1	-1	1	-1	-1	1	-1	1	-1	-1	1	1	1	-1	0	-1	-1	1	-1	1	1	-1	1	1	1	-1	1	1	-1	-1	1
binX14700000	X	14700070	-1	1	1	1	1	1	1	1	-1	-1	1	-1	1	1	1	-1	-1	-1	1	-1	-1	1	-1	1	-1	-1	1	1	1	-1	0	-1	-1	1	-1	1	1	-1	1	1	1	-1	1	1	-1	-1	1
binX14990000	X	14990070	-1	1	1	1	1	1	1	1	-1	-1	1	-1	1	1	1	-1	-1	-1	1	-1	-1	1	-1	1	-1	-1	1	1	1	-1	0	-1	-1	1	-1	1	1	-1	1	1	1	-1	1	1	-1	-1	1
binX15000000	X	15000070	-1	1	1	1	1	1	1	1	-1	-1	1	-1	1	1	1	-1	-1	-1	1	-1	-1	1	-1	1	-1	-1	1	1	1	-1	0	-1	-1	1	-1	1	1	-1	1	1	1	-1	1	1	-1	-1	1
binX15070000	X	15070070	-1	1	1	1	1	1	1	1	-1	-1	1	-1	1	1	1	-1	-1	-1	1	-1	-1	1	-1	1	-1	-1	1	1	1	-1	0	-1	-1	1	-1	1	1	-1	1	1	1	-1	1	1	-1	-1	1
binX15080000	X	15080070	-1	1	1	1	1	1	1	1	-1	-1	1	-1	1	1	1	-1	-1	-1	1	-1	-1	1	-1	1	-1	-1	1	1	1	-1	0	-1	-1	1	-1	1	1	-1	1	1	1	-1	1	1	-1	-1	1
binX15130000	X	15130070	-1	1	1	1	1	1	1	1	-1	-1	-1	-1	1	-1	1	-1	-1	1	1	-1	-1	1	-1	1	-1	-1	1	1	1	-1	0	-1	-1	1	1	1	1	-1	1	1	1	-1	1	1	-1	-1	-1
binX15140000	X	15140070	-1	1	1	1	1	1	1	1	-1	-1	-1	-1	1	-1	1	-1	-1	1	1	-1	-1	1	-1	1	-1	-1	1	1	1	-1	0	-1	-1	1	1	1	1	-1	1	1	1	-1	1	1	-1	-1	-1
binX15150000	X	15150070	-1	1	1	1	1	1	1	1	-1	-1	-1	-1	1	-1	1	-1	-1	1	1	-1	-1	1	-1	1	-1	-1	1	1	1	-1	0	-1	-1	1	1	1	1	-1	1	1	1	-1	1	1	-1	-1	-1
binX15370000	X	15370069	-1	1	1	1	1	1	1	1	-1	-1	-1	-1	1	-1	1	-1	-1	1	1	-1	-1	1	-1	1	-1	-1	1	1	1	-1	0	-1	-1	1	1	1	1	-1	1	1	1	-1	1	1	-1	-1	-1
binX15380000	X	15380069	-1	1	1	1	1	1	1	1	-1	-1	-1	-1	1	-1	1	-1	-1	1	1	-1	-1	1	-1	1	-1	-1	1	1	1	-1	0	-1	-1	1	1	1	1	-1	1	1	1	-1	1	1	-1	-1	-1
binX15440000	X	15440069	-1	1	1	1	1	1	1	1	-1	-1	-1	-1	1	-1	1	-1	-1	1	1	-1	-1	1	-1	1	-1	-1	1	1	1	-1	0	-1	-1	1	1	1	1	-1	1	1	1	-1	1	1	-1	-1	-1
binX15450000	X	15450069	-1	1	1	1	1	1	1	1	-1	-1	-1	-1	1	-1	1	-1	-1	1	1	-1	-1	1	-1	1	-1	-1	1	1	1	-1	0	-1	-1	1	1	1	1	-1	1	1	1	-1	1	1	-1	-1	-1
binX15650000	X	15650068	-1	1	1	1	1	1	1	1	-1	-1	-1	-1	1	-1	1	-1	-1	1	1	-1	-1	1	-1	1	-1	-1	1	1	1	-1	0	-1	-1	1	1	1	1	-1	1	1	1	-1	1	1	-1	-1	-1
binX15660000	X	15660068	-1	1	1	1	1	1	1	1	-1	-1	-1	-1	1	-1	1	-1	-1	1	1	-1	-1	1	-1	1	-1	-1	1	1	1	-1	0	-1	-1	1	1	1	1	-1	1	1	1	-1	1	1	-1	-1	-1
binX16540000	X	16540073	-1	1	1	1	1	1	1	1	-1	-1	-1	-1	1	-1	1	-1	-1	1	1	-1	-1	1	-1	1	-1	-1	1	1	1	-1	0	-1	-1	1	1	1	1	-1	1	1	1	-1	1	1	-1	-1	-1
binX16550000	X	16550073	-1	1	1	1	1	1	1	1	-1	-1	-1	-1	1	-1	1	-1	-1	1	1	-1	-1	1	-1	1	-1	-1	1	1	1	-1	0	-1	-1	1	1	1	1	-1	1	1	1	-1	1	1	-1	-1	-1
binX16690000	X	16690073	-1	1	1	1	1	1	1	1	-1	-1	-1	-1	1	-1	1	-1	-1	1	1	-1	-1	1	-1	1	-1	-1	1	1	1	-1	0	-1	-1	1	1	1	1	-1	1	1	1	-1	1	1	-1	-1	-1
binX16700000	X	16700073	-1	1	1	1	1	1	1	1	-1	-1	-1	-1	1	-1	1	-1	-1	1	1	-1	-1	1	-1	1	-1	-1	1	1	1	-1	0	-1	-1	1	1	1	1	-1	1	1	1	-1	1	1	-1	-1	-1
binX17718866	X	17718866	-1	1	1	1	1	1	1	1	-1	-1	-1	-1	1	-1	1	-1	-1	1	1	-1	-1	1	-1	1	-1	-1	1	1	1	-1	0	-1	-1	1	1	1	1	-1	1	1	1	-1	1	1	-1	-1	-1
[truncated: 160 more columns]
