# Supplementary material for: Natural genetic variation in C. elegans identified genomic loci controlling metabolite levels
Source: Genome Res. 2018 Sep;28(9):1296–308. doi: 10.1101/gr.232322.117 (PMC6120624; doi:10.1101/gr.232322.117)
Supplement: Supplemental Material [file supp_gr.232322.117_Supplemental_Table_S2.xlsx]

## Sheet: Description
Supplemental Table S2:
Sheet 1 contains a table with the metabolomics data gathered for this study.
The file includes the raw values as obtained via the MS analysis and all the data transformations used for subsequent analysis.
Data is ordered by batch, metabolite, strain, and biological replicate.
For each trait, an upper and lower bound for outlier analysis is indicated.
Sheet 2 contains a summary of all the data, per transformation per metabolite the maximum, minimum, mean, and fold differences are given.
Sheet 3 contains information of metabolites measured in this study, including chemical name, CheBI ID, formula, InChI, InChI Key, and SMILES code.

## Sheet: Metabolomics data
batch	metabolite	strain	biological	Data_type	strain_type	trait_transformation	value	trait	upper	lower	outlier
3	C14:0	CB4856	b1	Fat	PL_CB4856	Abs.conc	8.72169	C14:0.Abs.conc	15.2533	5.69295	FALSE
3	C14:0	N2	b1	Fat	PL_N2	Abs.conc	9.48236	C14:0.Abs.conc	13.1187	5.42306	FALSE
3	C14:0	WN009	b1	Fat	RIL	Abs.conc	10.842	C14:0.Abs.conc	20.3367	7.76607	FALSE
3	C14:0	WN013	b1	Fat	RIL	Abs.conc	10.4106	C14:0.Abs.conc	20.5703	5.66318	FALSE
3	C14:0	WN020	b1	Fat	RIL	Abs.conc	8.69999	C14:0.Abs.conc	15.6288	7.09441	FALSE
3	C14:0	WN021	b1	Fat	RIL	Abs.conc	8.88812	C14:0.Abs.conc	18.7785	4.64006	FALSE
3	C14:0	WN031	b1	Fat	RIL	Abs.conc	4.89818	C14:0.Abs.conc			FALSE
3	C14:0	WN038	b1	Fat	RIL	Abs.conc	7.15074	C14:0.Abs.conc	22.596	3.94171	FALSE
3	C14:0	WN046	b1	Fat	RIL	Abs.conc	7.4981	C14:0.Abs.conc	20.0352	5.19177	FALSE
3	C14:0	WN049	b1	Fat	RIL	Abs.conc	9.06847	C14:0.Abs.conc	21.116	2.54324	FALSE
3	C14:0	WN054	b1	Fat	RIL	Abs.conc	11.2812	C14:0.Abs.conc	14.3896	10.7493	FALSE
3	C14:0	WN055	b1	Fat	RIL	Abs.conc	11.2435	C14:0.Abs.conc			FALSE
3	C14:0	WN057	b1	Fat	RIL	Abs.conc	9.33397	C14:0.Abs.conc	12.1379	8.53159	FALSE
3	C14:0	WN058	b1	Fat	RIL	Abs.conc	12.1149	C14:0.Abs.conc	16.2508	9.02216	FALSE
3	C14:0	WN071	b1	Fat	RIL	Abs.conc	7.56485	C14:0.Abs.conc	22.3753	5.38631	FALSE
3	C14:0	WN075	b1	Fat	RIL	Abs.conc	9.70929	C14:0.Abs.conc	13.5254	6.98328	FALSE
3	C14:0	WN076	b1	Fat	RIL	Abs.conc	9.14783	C14:0.Abs.conc	16.0109	5.92412	FALSE
3	C14:0	WN098	b1	Fat	RIL	Abs.conc	9.86989	C14:0.Abs.conc	18.5657	7.854	FALSE
3	C14:0	WN105	b1	Fat	RIL	Abs.conc	12.2334	C14:0.Abs.conc	18.4074	9.78021	FALSE
3	C14:0	WN106	b1	Fat	RIL	Abs.conc	7.41924	C14:0.Abs.conc	8.47625	1.96742	FALSE
3	C14:0	WN107	b1	Fat	RIL	Abs.conc	13.2501	C14:0.Abs.conc	16.459	9.83753	FALSE
3	C14:0	WN109	b1	Fat	RIL	Abs.conc	9.91934	C14:0.Abs.conc	11.7219	5.38615	FALSE
3	C14:0	WN110	b1	Fat	RIL	Abs.conc	9.9671	C14:0.Abs.conc	25.2445	6.28236	FALSE
3	C14:0	WN112	b1	Fat	RIL	Abs.conc	9.26739	C14:0.Abs.conc	19.8506	2.86474	FALSE
3	C14:0	WN116	b1	Fat	RIL	Abs.conc	10.0163	C14:0.Abs.conc	17.7963	4.72548	FALSE
3	C14:0	WN124	b1	Fat	RIL	Abs.conc	8.94345	C14:0.Abs.conc	16.5982	6.59005	FALSE
3	C14:0	WN128	b1	Fat	RIL	Abs.conc	10.2954	C14:0.Abs.conc	15.5996	8.28756	FALSE
3	C14:0	WN129	b1	Fat	RIL	Abs.conc	9.07257	C14:0.Abs.conc	13.7224	8.40311	FALSE
3	C14:1	CB4856	b1	Fat	PL_CB4856	Abs.conc	5.67476	C14:1.Abs.conc	10.0353	1.986	FALSE
3	C14:1	N2	b1	Fat	PL_N2	Abs.conc	2.64843	C14:1.Abs.conc	3.52255	1.2089	FALSE
3	C14:1	WN009	b1	Fat	RIL	Abs.conc	3.87439	C14:1.Abs.conc	7.18231	2.12317	FALSE
3	C14:1	WN013	b1	Fat	RIL	Abs.conc	4.37635	C14:1.Abs.conc	6.82312	1.94272	FALSE
3	C14:1	WN020	b1	Fat	RIL	Abs.conc	6.39281	C14:1.Abs.conc	7.27049	4.79546	FALSE
3	C14:1	WN021	b1	Fat	RIL	Abs.conc	4.12432	C14:1.Abs.conc	7.60997	1.50694	FALSE
3	C14:1	WN031	b1	Fat	RIL	Abs.conc	3.2725	C14:1.Abs.conc			FALSE
3	C14:1	WN038	b1	Fat	RIL	Abs.conc	4.97366	C14:1.Abs.conc	12.6945	3.41574	FALSE
3	C14:1	WN046	b1	Fat	RIL	Abs.conc	3.68949	C14:1.Abs.conc	8.60649	2.75833	FALSE
3	C14:1	WN049	b1	Fat	RIL	Abs.conc	6.29328	C14:1.Abs.conc	10.8399	3.69766	FALSE
3	C14:1	WN054	b1	Fat	RIL	Abs.conc	3.91477	C14:1.Abs.conc	3.94424	3.8107	FALSE
3	C14:1	WN055	b1	Fat	RIL	Abs.conc	4.88458	C14:1.Abs.conc			FALSE
3	C14:1	WN057	b1	Fat	RIL	Abs.conc	5.08038	C14:1.Abs.conc	5.56597	2.85682	FALSE
3	C14:1	WN058	b1	Fat	RIL	Abs.conc	3.53748	C14:1.Abs.conc	6.00797	2.68629	FALSE
3	C14:1	WN071	b1	Fat	RIL	Abs.conc	4.25393	C14:1.Abs.conc	7.80654	3.65798	FALSE
3	C14:1	WN075	b1	Fat	RIL	Abs.conc	3.88605	C14:1.Abs.conc	4.7351	0.995589	FALSE
3	C14:1	WN076	b1	Fat	RIL	Abs.conc	3.74054	C14:1.Abs.conc	6.46244	1.92322	FALSE
3	C14:1	WN098	b1	Fat	RIL	Abs.conc	5.1471	C14:1.Abs.conc	5.6578	2.68428	FALSE
3	C14:1	WN105	b1	Fat	RIL	Abs.conc	6.20312	C14:1.Abs.conc	10.9538	4.02915	FALSE
3	C14:1	WN106	b1	Fat	RIL	Abs.conc	3.02565	C14:1.Abs.conc	3.77242	1.16455	FALSE
3	C14:1	WN107	b1	Fat	RIL	Abs.conc	2.36015	C14:1.Abs.conc	8.97833	0.913439	FALSE
3	C14:1	WN109	b1	Fat	RIL	Abs.conc	4.33772	C14:1.Abs.conc	6.31502	2.77679	FALSE
3	C14:1	WN110	b1	Fat	RIL	Abs.conc	5.38554	C14:1.Abs.conc	16.2875	2.70283	FALSE
3	C14:1	WN112	b1	Fat	RIL	Abs.conc	3.0187	C14:1.Abs.conc	5.70409	0.451155	FALSE
3	C14:1	WN116	b1	Fat	RIL	Abs.conc	2.82481	C14:1.Abs.conc	3.94132	1.53343	FALSE
3	C14:1	WN124	b1	Fat	RIL	Abs.conc	5.06892	C14:1.Abs.conc	9.75095	2.72616	FALSE
3	C14:1	WN128	b1	Fat	RIL	Abs.conc	7.01353	C14:1.Abs.conc	7.87653	4.63022	FALSE
3	C14:1	WN129	b1	Fat	RIL	Abs.conc	3.04569	C14:1.Abs.conc	3.99631	2.80641	FALSE
3	C15:0	CB4856	b1	Fat	PL_CB4856	Abs.conc	56.2666	C15:0.Abs.conc	90.4775	33.3377	FALSE
3	C15:0	N2	b1	Fat	PL_N2	Abs.conc	44.9955	C15:0.Abs.conc	56.4619	27.9306	FALSE
3	C15:0	WN009	b1	Fat	RIL	Abs.conc	45.1339	C15:0.Abs.conc	90.288	30.8122	FALSE
3	C15:0	WN013	b1	Fat	RIL	Abs.conc	48.7188	C15:0.Abs.conc	79.9419	31.3131	FALSE
3	C15:0	WN020	b1	Fat	RIL	Abs.conc	51.5341	C15:0.Abs.conc	102.393	41.6317	FALSE
3	C15:0	WN021	b1	Fat	RIL	Abs.conc	46.1091	C15:0.Abs.conc	98.7849	18.7197	FALSE
3	C15:0	WN031	b1	Fat	RIL	Abs.conc	29.0342	C15:0.Abs.conc			FALSE
3	C15:0	WN038	b1	Fat	RIL	Abs.conc	47.7314	C15:0.Abs.conc	115.434	32.2549	FALSE
3	C15:0	WN046	b1	Fat	RIL	Abs.conc	42.4277	C15:0.Abs.conc	103.851	30.8106	FALSE
3	C15:0	WN049	b1	Fat	RIL	Abs.conc	46.7946	C15:0.Abs.conc	101.606	16.6925	FALSE
3	C15:0	WN054	b1	Fat	RIL	Abs.conc	59.945	C15:0.Abs.conc	68.2316	55.717	FALSE
3	C15:0	WN055	b1	Fat	RIL	Abs.conc	55.1083	C15:0.Abs.conc			FALSE
3	C15:0	WN057	b1	Fat	RIL	Abs.conc	58.4942	C15:0.Abs.conc	74.0706	53.8025	FALSE
3	C15:0	WN058	b1	Fat	RIL	Abs.conc	55.9306	C15:0.Abs.conc	73.6116	41.0045	FALSE
3	C15:0	WN071	b1	Fat	RIL	Abs.conc	44.7698	C15:0.Abs.conc	83.173	39.127	FALSE
3	C15:0	WN075	b1	Fat	RIL	Abs.conc	61.0108	C15:0.Abs.conc	74.5097	40.7274	FALSE
3	C15:0	WN076	b1	Fat	RIL	Abs.conc	60.2451	C15:0.Abs.conc	89.6755	41.3057	FALSE
3	C15:0	WN098	b1	Fat	RIL	Abs.conc	49.1279	C15:0.Abs.conc	82.4761	40.0754	FALSE
3	C15:0	WN105	b1	Fat	RIL	Abs.conc	66.2483	C15:0.Abs.conc	104.413	45.9565	FALSE
3	C15:0	WN106	b1	Fat	RIL	Abs.conc	45.809	C15:0.Abs.conc	52.4386	15.8947	FALSE
3	C15:0	WN107	b1	Fat	RIL	Abs.conc	59.0112	C15:0.Abs.conc	73.1735	52.0565	FALSE
3	C15:0	WN109	b1	Fat	RIL	Abs.conc	52.2636	C15:0.Abs.conc	66.6402	38.9304	FALSE
3	C15:0	WN110	b1	Fat	RIL	Abs.conc	38.3453	C15:0.Abs.conc	137.966	20.8589	FALSE
3	C15:0	WN112	b1	Fat	RIL	Abs.conc	48.906	C15:0.Abs.conc	102.094	16.8761	FALSE
3	C15:0	WN116	b1	Fat	RIL	Abs.conc	44.2121	C15:0.Abs.conc	71.4497	24.3122	FALSE
3	C15:0	WN124	b1	Fat	RIL	Abs.conc	54.4964	C15:0.Abs.conc	93.3758	40.241	FALSE
3	C15:0	WN128	b1	Fat	RIL	Abs.conc	54.1902	C15:0.Abs.conc	84.1833	43.8578	FALSE
3	C15:0	WN129	b1	Fat	RIL	Abs.conc	55.3591	C15:0.Abs.conc	76.9926	51.5729	FALSE
3	C15:1	CB4856	b1	Fat	PL_CB4856	Abs.conc	2.52683	C15:1.Abs.conc	3.57166	1.45035	FALSE
3	C15:1	N2	b1	Fat	PL_N2	Abs.conc	1.6236	C15:1.Abs.conc	2.14929	1.08863	FALSE
3	C15:1	WN009	b1	Fat	RIL	Abs.conc	1.74507	C15:1.Abs.conc	2.99272	1.30921	FALSE
3	C15:1	WN013	b1	Fat	RIL	Abs.conc	2.32561	C15:1.Abs.conc	3.0532	1.22048	FALSE
3	C15:1	WN020	b1	Fat	RIL	Abs.conc	2.69473	C15:1.Abs.conc	3.50259	2.32762	FALSE
3	C15:1	WN021	b1	Fat	RIL	Abs.conc	2.11801	C15:1.Abs.conc	3.91606	0.73537	FALSE
3	C15:1	WN031	b1	Fat	RIL	Abs.conc	1.93422	C15:1.Abs.conc			FALSE
3	C15:1	WN038	b1	Fat	RIL	Abs.conc	1.64478	C15:1.Abs.conc	4.18307	1.07161	FALSE
3	C15:1	WN046	b1	Fat	RIL	Abs.conc	2.00803	C15:1.Abs.conc	3.55034	1.70541	FALSE
3	C15:1	WN049	b1	Fat	RIL	Abs.conc	3.05056	C15:1.Abs.conc	5.0805	1.55328	FALSE
3	C15:1	WN054	b1	Fat	RIL	Abs.conc	2.15246	C15:1.Abs.conc	2.32237	1.85037	FALSE
3	C15:1	WN055	b1	Fat	RIL	Abs.conc	2.30445	C15:1.Abs.conc			FALSE
3	C15:1	WN057	b1	Fat	RIL	Abs.conc	1.99917	C15:1.Abs.conc	2.39068	1.88531	FALSE
3	C15:1	WN058	b1	Fat	RIL	Abs.conc	4.06845	C15:1.Abs.conc	4.34719	0.934679	FALSE
3	C15:1	WN071	b1	Fat	RIL	Abs.conc	1.8652	C15:1.Abs.conc	2.65629	1.71681	FALSE
3	C15:1	WN075	b1	Fat	RIL	Abs.conc	2.58842	C15:1.Abs.conc	3.13024	0.626456	FALSE
3	C15:1	WN076	b1	Fat	RIL	Abs.conc	1.95217	C15:1.Abs.conc	3.50848	0.993475	FALSE
3	C15:1	WN098	b1	Fat	RIL	Abs.conc	2.42529	C15:1.Abs.conc	3.15015	2.01021	FALSE
3	C15:1	WN105	b1	Fat	RIL	Abs.conc	2.12754	C15:1.Abs.conc	3.83133	1.68888	FALSE
3	C15:1	WN106	b1	Fat	RIL	Abs.conc	1.80382	C15:1.Abs.conc	2.25446	0.980482	FALSE
3	C15:1	WN107	b1	Fat	RIL	Abs.conc	2.93098	C15:1.Abs.conc	3.30403	1.68858	FALSE
3	C15:1	WN109	b1	Fat	RIL	Abs.conc	1.93436	C15:1.Abs.conc	3.90951	1.05216	FALSE
3	C15:1	WN110	b1	Fat	RIL	Abs.conc	2.00083	C15:1.Abs.conc	4.81043	1.41008	FALSE
3	C15:1	WN112	b1	Fat	RIL	Abs.conc	2.00734	C15:1.Abs.conc	2.92073	0.904583	FALSE
3	C15:1	WN116	b1	Fat	RIL	Abs.conc	2.00503	C15:1.Abs.conc	2.65716	1.05596	FALSE
3	C15:1	WN124	b1	Fat	RIL	Abs.conc	2.17489	C15:1.Abs.conc	3.48116	1.48071	FALSE
3	C15:1	WN128	b1	Fat	RIL	Abs.conc	2.29067	C15:1.Abs.conc	3.41656	1.84329	FALSE
3	C15:1	WN129	b1	Fat	RIL	Abs.conc	1.79806	C15:1.Abs.conc	2.15424	1.56107	FALSE
3	C16:0	CB4856	b1	Fat	PL_CB4856	Abs.conc	16.0072	C16:0.Abs.conc	40.1131	8.29953	FALSE
3	C16:0	N2	b1	Fat	PL_N2	Abs.conc	18.8298	C16:0.Abs.conc	33.3421	8.30282	FALSE
3	C16:0	WN009	b1	Fat	RIL	Abs.conc	21.4983	C16:0.Abs.conc	53.7223	15.4735	FALSE
3	C16:0	WN013	b1	Fat	RIL	Abs.conc	23.8716	C16:0.Abs.conc	42.4586	15.221	FALSE
3	C16:0	WN020	b1	Fat	RIL	Abs.conc	18.4754	C16:0.Abs.conc	38.31	14.6463	FALSE
3	C16:0	WN021	b1	Fat	RIL	Abs.conc	19.1044	C16:0.Abs.conc	49.6037	11.5211	FALSE
3	C16:0	WN031	b1	Fat	RIL	Abs.conc	12.4318	C16:0.Abs.conc			FALSE
3	C16:0	WN038	b1	Fat	RIL	Abs.conc	17.1554	C16:0.Abs.conc	57.894	9.47191	FALSE
3	C16:0	WN046	b1	Fat	RIL	Abs.conc	15.9865	C16:0.Abs.conc	46.8445	10.3545	FALSE
3	C16:0	WN049	b1	Fat	RIL	Abs.conc	15.5993	C16:0.Abs.conc	47.8044	4.07101	FALSE
3	C16:0	WN054	b1	Fat	RIL	Abs.conc	22.2863	C16:0.Abs.conc	32.887	19.8121	FALSE
3	C16:0	WN055	b1	Fat	RIL	Abs.conc	19.3928	C16:0.Abs.conc			FALSE
3	C16:0	WN057	b1	Fat	RIL	Abs.conc	20.2805	C16:0.Abs.conc	31.2007	18.0803	FALSE
3	C16:0	WN058	b1	Fat	RIL	Abs.conc	25.7465	C16:0.Abs.conc	36.8967	20.7914	FALSE
3	C16:0	WN071	b1	Fat	RIL	Abs.conc	14.5181	C16:0.Abs.conc	49.9039	9.26101	FALSE
3	C16:0	WN075	b1	Fat	RIL	Abs.conc	21.9695	C16:0.Abs.conc	35.2571	18.0834	FALSE
3	C16:0	WN076	b1	Fat	RIL	Abs.conc	20.038	C16:0.Abs.conc	36.5002	16.0186	FALSE
3	C16:0	WN098	b1	Fat	RIL	Abs.conc	22.6369	C16:0.Abs.conc	51.0224	17.4566	FALSE
3	C16:0	WN105	b1	Fat	RIL	Abs.conc	24.4271	C16:0.Abs.conc	45.7669	19.5271	FALSE
3	C16:0	WN106	b1	Fat	RIL	Abs.conc	13.895	C16:0.Abs.conc	22.3784	10.2636	FALSE
3	C16:0	WN107	b1	Fat	RIL	Abs.conc	35.7834	C16:0.Abs.conc	41.2479	27.0962	FALSE
3	C16:0	WN109	b1	Fat	RIL	Abs.conc	21.3221	C16:0.Abs.conc	28.8957	15.5425	FALSE
3	C16:0	WN110	b1	Fat	RIL	Abs.conc	23.1145	C16:0.Abs.conc	55.2202	15.3011	FALSE
3	C16:0	WN112	b1	Fat	RIL	Abs.conc	19.5822	C16:0.Abs.conc	44.364	9.40995	FALSE
3	C16:0	WN116	b1	Fat	RIL	Abs.conc	17.7095	C16:0.Abs.conc	46.9437	6.59667	FALSE
3	C16:0	WN124	b1	Fat	RIL	Abs.conc	17.6038	C16:0.Abs.conc	41.51	11.5137	FALSE
3	C16:0	WN128	b1	Fat	RIL	Abs.conc	18.3831	C16:0.Abs.conc	38.8873	12.3347	FALSE
3	C16:0	WN129	b1	Fat	RIL	Abs.conc	19.4998	C16:0.Abs.conc	41.2522	16.2548	FALSE
3	C16:1	CB4856	b1	Fat	PL_CB4856	Abs.conc	16.3092	C16:1.Abs.conc	38.7189	4.81626	FALSE
3	C16:1	N2	b1	Fat	PL_N2	Abs.conc	18.1872	C16:1.Abs.conc	21.8728	10.255	FALSE
3	C16:1	WN009	b1	Fat	RIL	Abs.conc	20.0761	C16:1.Abs.conc	56.8468	9.44774	FALSE
3	C16:1	WN013	b1	Fat	RIL	Abs.conc	17.7672	C16:1.Abs.conc	36.0448	10.2998	FALSE
3	C16:1	WN020	b1	Fat	RIL	Abs.conc	17.6849	C16:1.Abs.conc	28.2925	14.1777	FALSE
3	C16:1	WN021	b1	Fat	RIL	Abs.conc	14.6963	C16:1.Abs.conc	30.1786	5.80067	FALSE
3	C16:1	WN031	b1	Fat	RIL	Abs.conc	11.2909	C16:1.Abs.conc			FALSE
3	C16:1	WN038	b1	Fat	RIL	Abs.conc	18.7147	C16:1.Abs.conc	58.8703	11.9143	FALSE
3	C16:1	WN046	b1	Fat	RIL	Abs.conc	15.1258	C16:1.Abs.conc	49.4439	5.58795	FALSE
3	C16:1	WN049	b1	Fat	RIL	Abs.conc	19.7108	C16:1.Abs.conc	35.4892	8.09957	FALSE
3	C16:1	WN054	b1	Fat	RIL	Abs.conc	21.1985	C16:1.Abs.conc	35.9077	17.3266	FALSE
3	C16:1	WN055	b1	Fat	RIL	Abs.conc	22.9433	C16:1.Abs.conc			FALSE
3	C16:1	WN057	b1	Fat	RIL	Abs.conc	21.9145	C16:1.Abs.conc	23.1457	15.9769	FALSE
3	C16:1	WN058	b1	Fat	RIL	Abs.conc	18.7967	C16:1.Abs.conc	29.2411	13.2644	FALSE
3	C16:1	WN071	b1	Fat	RIL	Abs.conc	14.5537	C16:1.Abs.conc	33.305	11.3384	FALSE
3	C16:1	WN075	b1	Fat	RIL	Abs.conc	18.7081	C16:1.Abs.conc	23.8972	10.2362	FALSE
3	C16:1	WN076	b1	Fat	RIL	Abs.conc	20.8807	C16:1.Abs.conc	25.4791	15.0586	FALSE
3	C16:1	WN098	b1	Fat	RIL	Abs.conc	22.8128	C16:1.Abs.conc	28.6452	17.8493	FALSE
3	C16:1	WN105	b1	Fat	RIL	Abs.conc	23.071	C16:1.Abs.conc	50.6656	8.72643	FALSE
3	C16:1	WN106	b1	Fat	RIL	Abs.conc	14.777	C16:1.Abs.conc	17.5904	3.45771	FALSE
3	C16:1	WN107	b1	Fat	RIL	Abs.conc	12.0014	C16:1.Abs.conc	48.2764	6.13564	FALSE
3	C16:1	WN109	b1	Fat	RIL	Abs.conc	17.9469	C16:1.Abs.conc	20.7138	11.4153	FALSE
3	C16:1	WN110	b1	Fat	RIL	Abs.conc	15.8633	C16:1.Abs.conc	59.3616	6.53753	FALSE
3	C16:1	WN112	b1	Fat	RIL	Abs.conc	16.2145	C16:1.Abs.conc	29.3298	7.96586	FALSE
3	C16:1	WN116	b1	Fat	RIL	Abs.conc	13.7987	C16:1.Abs.conc	28.7966	6.99141	FALSE
3	C16:1	WN124	b1	Fat	RIL	Abs.conc	15.6995	C16:1.Abs.conc	29.7418	8.36229	FALSE
3	C16:1	WN128	b1	Fat	RIL	Abs.conc	21.4306	C16:1.Abs.conc	27.1706	14.4746	FALSE
3	C16:1	WN129	b1	Fat	RIL	Abs.conc	15.5858	C16:1.Abs.conc	49.0113	6.58136	FALSE
3	C17:0	CB4856	b1	Fat	PL_CB4856	Abs.conc	62.7116	C17:0.Abs.conc	81.2314	32.7645	FALSE
3	C17:0	N2	b1	Fat	PL_N2	Abs.conc	44.5942	C17:0.Abs.conc	52.8396	32.1002	FALSE
3	C17:0	WN009	b1	Fat	RIL	Abs.conc	45.6211	C17:0.Abs.conc	80.4426	32.7919	FALSE
3	C17:0	WN013	b1	Fat	RIL	Abs.conc	44.6891	C17:0.Abs.conc	66.4407	32.1081	FALSE
3	C17:0	WN020	b1	Fat	RIL	Abs.conc	50.3856	C17:0.Abs.conc	88.6728	41.7374	FALSE
3	C17:0	WN021	b1	Fat	RIL	Abs.conc	54.2564	C17:0.Abs.conc	106.514	26.9772	FALSE
3	C17:0	WN031	b1	Fat	RIL	Abs.conc	48.886	C17:0.Abs.conc			FALSE
3	C17:0	WN038	b1	Fat	RIL	Abs.conc	44.8892	C17:0.Abs.conc	99.4169	33.9174	FALSE
3	C17:0	WN046	b1	Fat	RIL	Abs.conc	45.6527	C17:0.Abs.conc	112.241	35.2431	FALSE
3	C17:0	WN049	b1	Fat	RIL	Abs.conc	45.2059	C17:0.Abs.conc	100.717	21.0431	FALSE
3	C17:0	WN054	b1	Fat	RIL	Abs.conc	45.5924	C17:0.Abs.conc	61.8812	42.0049	FALSE
3	C17:0	WN055	b1	Fat	RIL	Abs.conc	44.9219	C17:0.Abs.conc			FALSE
3	C17:0	WN057	b1	Fat	RIL	Abs.conc	57.8885	C17:0.Abs.conc	68.0643	51.574	FALSE
3	C17:0	WN058	b1	Fat	RIL	Abs.conc	51.0001	C17:0.Abs.conc	65.6401	36.6421	FALSE
3	C17:0	WN071	b1	Fat	RIL	Abs.conc	52.2407	C17:0.Abs.conc	65.8429	49.1316	FALSE
3	C17:0	WN075	b1	Fat	RIL	Abs.conc	58.3261	C17:0.Abs.conc	71.4716	32.7513	FALSE
3	C17:0	WN076	b1	Fat	RIL	Abs.conc	55.4451	C17:0.Abs.conc	101.125	32.8372	FALSE
3	C17:0	WN098	b1	Fat	RIL	Abs.conc	51.5308	C17:0.Abs.conc	73.8854	42.2349	FALSE
3	C17:0	WN105	b1	Fat	RIL	Abs.conc	59.2032	C17:0.Abs.conc	93.0806	45.5819	FALSE
3	C17:0	WN106	b1	Fat	RIL	Abs.conc	41.2624	C17:0.Abs.conc	64.9012	28.2427	FALSE
3	C17:0	WN107	b1	Fat	RIL	Abs.conc	44.809	C17:0.Abs.conc	90.884	35.6488	FALSE
3	C17:0	WN109	b1	Fat	RIL	Abs.conc	49.0089	C17:0.Abs.conc	102.485	38.9866	FALSE
3	C17:0	WN110	b1	Fat	RIL	Abs.conc	39.5	C17:0.Abs.conc	97.7803	26.1477	FALSE
3	C17:0	WN112	b1	Fat	RIL	Abs.conc	48.9009	C17:0.Abs.conc	94.0413	23.0332	FALSE
3	C17:0	WN116	b1	Fat	RIL	Abs.conc	40.2002	C17:0.Abs.conc	66.8308	23.692	FALSE
3	C17:0	WN124	b1	Fat	RIL	Abs.conc	50.6155	C17:0.Abs.conc	95.5314	31.4108	FALSE
3	C17:0	WN128	b1	Fat	RIL	Abs.conc	50.9636	C17:0.Abs.conc	80.078	43.2078	FALSE
3	C17:0	WN129	b1	Fat	RIL	Abs.conc	57.3035	C17:0.Abs.conc	79.2685	50.2595	FALSE
3	C17:1	CB4856	b1	Fat	PL_CB4856	Abs.conc	35.1789	C17:1.Abs.conc	61.6544	26.9697	FALSE
3	C17:1	N2	b1	Fat	PL_N2	Abs.conc	43.0809	C17:1.Abs.conc	54.2833	29.7424	FALSE
3	C17:1	WN009	b1	Fat	RIL	Abs.conc	38.9905	C17:1.Abs.conc	66.9077	28.6834	FALSE
3	C17:1	WN013	b1	Fat	RIL	Abs.conc	46.0439	C17:1.Abs.conc	57.26	32.7892	FALSE
3	C17:1	WN020	b1	Fat	RIL	Abs.conc	39.4931	C17:1.Abs.conc	61.5781	32.8468	FALSE
3	C17:1	WN021	b1	Fat	RIL	Abs.conc	36.2006	C17:1.Abs.conc	69.7458	16.4965	FALSE
3	C17:1	WN031	b1	Fat	RIL	Abs.conc	23.1778	C17:1.Abs.conc			FALSE
3	C17:1	WN038	b1	Fat	RIL	Abs.conc	36.7869	C17:1.Abs.conc	72.7906	27.2082	FALSE
3	C17:1	WN046	b1	Fat	RIL	Abs.conc	33.1358	C17:1.Abs.conc	63.9948	27.0807	FALSE
3	C17:1	WN049	b1	Fat	RIL	Abs.conc	40.84	C17:1.Abs.conc	84.5586	14.8779	FALSE
3	C17:1	WN054	b1	Fat	RIL	Abs.conc	43.9822	C17:1.Abs.conc	47.7994	42.138	FALSE
3	C17:1	WN055	b1	Fat	RIL	Abs.conc	43.8975	C17:1.Abs.conc			FALSE
3	C17:1	WN057	b1	Fat	RIL	Abs.conc	38.4727	C17:1.Abs.conc	48.7554	33.835	FALSE
3	C17:1	WN058	b1	Fat	RIL	Abs.conc	54.2206	C17:1.Abs.conc	60.7029	31.6335	FALSE
3	C17:1	WN071	b1	Fat	RIL	Abs.conc	34.8742	C17:1.Abs.conc	54.9161	31.4185	FALSE
3	C17:1	WN075	b1	Fat	RIL	Abs.conc	50.946	C17:1.Abs.conc	64.3383	24.3232	FALSE
3	C17:1	WN076	b1	Fat	RIL	Abs.conc	41.941	C17:1.Abs.conc	62.2281	30.6269	FALSE
3	C17:1	WN098	b1	Fat	RIL	Abs.conc	47.0676	C17:1.Abs.conc	68.9307	39.8145	FALSE
3	C17:1	WN105	b1	Fat	RIL	Abs.conc	40.0546	C17:1.Abs.conc	60.4497	32.8367	FALSE
3	C17:1	WN106	b1	Fat	RIL	Abs.conc	33.8445	C17:1.Abs.conc	39.4936	6.19942	FALSE
3	C17:1	WN107	b1	Fat	RIL	Abs.conc	50.4829	C17:1.Abs.conc	54.3686	33.9127	FALSE
3	C17:1	WN109	b1	Fat	RIL	Abs.conc	37.8531	C17:1.Abs.conc	42.3884	26.0255	FALSE
3	C17:1	WN110	b1	Fat	RIL	Abs.conc	37.2878	C17:1.Abs.conc	67.3932	26.0487	FALSE
3	C17:1	WN112	b1	Fat	RIL	Abs.conc	37.1182	C17:1.Abs.conc	66.072	17.9301	FALSE
3	C17:1	WN116	b1	Fat	RIL	Abs.conc	39.9474	C17:1.Abs.conc	64.6466	21.9093	FALSE
3	C17:1	WN124	b1	Fat	RIL	Abs.conc	32.4858	C17:1.Abs.conc	56.2391	22.6139	FALSE
3	C17:1	WN128	b1	Fat	RIL	Abs.conc	36.7361	C17:1.Abs.conc	51.4072	30.4195	FALSE
3	C17:1	WN129	b1	Fat	RIL	Abs.conc	38.4975	C17:1.Abs.conc	50.169	34.7954	FALSE
3	C18:0	CB4856	b1	Fat	PL_CB4856	Abs.conc	33.1009	C18:0.Abs.conc	61.5885	16.753	FALSE
3	C18:0	N2	b1	Fat	PL_N2	Abs.conc	29.1544	C18:0.Abs.conc	41.9759	16.3441	FALSE
3	C18:0	WN009	b1	Fat	RIL	Abs.conc	33.6194	C18:0.Abs.conc	73.8104	24.2197	FALSE
3	C18:0	WN013	b1	Fat	RIL	Abs.conc	35.228	C18:0.Abs.conc	65.3898	22.8844	FALSE
3	C18:0	WN020	b1	Fat	RIL	Abs.conc	28.6742	C18:0.Abs.conc	59.6037	21.9217	FALSE
3	C18:0	WN021	b1	Fat	RIL	Abs.conc	29.7651	C18:0.Abs.conc	66.0107	17.5983	FALSE
3	C18:0	WN031	b1	Fat	RIL	Abs.conc	27.0234	C18:0.Abs.conc			FALSE
3	C18:0	WN038	b1	Fat	RIL	Abs.conc	28.0606	C18:0.Abs.conc	76.039	18.9175	FALSE
3	C18:0	WN046	b1	Fat	RIL	Abs.conc	26.775	C18:0.Abs.conc	60.6742	21.6095	FALSE
3	C18:0	WN049	b1	Fat	RIL	Abs.conc	28.4284	C18:0.Abs.conc	69.5961	11.5233	FALSE
3	C18:0	WN054	b1	Fat	RIL	Abs.conc	33.4971	C18:0.Abs.conc	58.8563	28.3046	FALSE
3	C18:0	WN055	b1	Fat	RIL	Abs.conc	30.6816	C18:0.Abs.conc			FALSE
3	C18:0	WN057	b1	Fat	RIL	Abs.conc	33.4661	C18:0.Abs.conc	46.2967	30.9731	FALSE
3	C18:0	WN058	b1	Fat	RIL	Abs.conc	32.2908	C18:0.Abs.conc	50.0741	27.6705	FALSE
3	C18:0	WN071	b1	Fat	RIL	Abs.conc	32.1945	C18:0.Abs.conc	62.0053	27.6626	FALSE
3	C18:0	WN075	b1	Fat	RIL	Abs.conc	33.7015	C18:0.Abs.conc	45.8347	26.637	FALSE
3	C18:0	WN076	b1	Fat	RIL	Abs.conc	30.7209	C18:0.Abs.conc	57.1311	22.191	FALSE
3	C18:0	WN098	b1	Fat	RIL	Abs.conc	36.6095	C18:0.Abs.conc	63.4517	30.0816	FALSE
3	C18:0	WN105	b1	Fat	RIL	Abs.conc	34.1526	C18:0.Abs.conc	59.549	27.4994	FALSE
3	C18:0	WN106	b1	Fat	RIL	Abs.conc	26.8571	C18:0.Abs.conc	41.0532	19.4056	FALSE
3	C18:0	WN107	b1	Fat	RIL	Abs.conc	45.4138	C18:0.Abs.conc	50.0476	36.8495	FALSE
3	C18:0	WN109	b1	Fat	RIL	Abs.conc	33.6641	C18:0.Abs.conc	51.3036	29.5359	FALSE
3	C18:0	WN110	b1	Fat	RIL	Abs.conc	30.3451	C18:0.Abs.conc	73.8255	19.549	FALSE
3	C18:0	WN112	b1	Fat	RIL	Abs.conc	29.3382	C18:0.Abs.conc	57.4622	16.4281	FALSE
3	C18:0	WN116	b1	Fat	RIL	Abs.conc	28.1665	C18:0.Abs.conc	61.1482	12.6661	FALSE
3	C18:0	WN124	b1	Fat	RIL	Abs.conc	27.7046	C18:0.Abs.conc	54.6135	19.8434	FALSE
3	C18:0	WN128	b1	Fat	RIL	Abs.conc	30.9914	C18:0.Abs.conc	60.1754	22.2766	FALSE
3	C18:0	WN129	b1	Fat	RIL	Abs.conc	29.633	C18:0.Abs.conc	57.0472	25.5492	FALSE
3	C18:1	CB4856	b1	Fat	PL_CB4856	Abs.conc	180.096	C18:1.Abs.conc	297.307	60.2389	FALSE
3	C18:1	N2	b1	Fat	PL_N2	Abs.conc	194.964	C18:1.Abs.conc	215.395	107.162	FALSE
3	C18:1	WN009	b1	Fat	RIL	Abs.conc	198.428	C18:1.Abs.conc	363.307	130.043	FALSE
3	C18:1	WN013	b1	Fat	RIL	Abs.conc	193.141	C18:1.Abs.conc	302.631	129.157	FALSE
3	C18:1	WN020	b1	Fat	RIL	Abs.conc	171.795	C18:1.Abs.conc	253.845	141.476	FALSE
3	C18:1	WN021	b1	Fat	RIL	Abs.conc	162.523	C18:1.Abs.conc	315.513	68.0533	FALSE
3	C18:1	WN031	b1	Fat	RIL	Abs.conc	159.492	C18:1.Abs.conc			FALSE
3	C18:1	WN038	b1	Fat	RIL	Abs.conc	193.04	C18:1.Abs.conc	353.04	154.72	FALSE
3	C18:1	WN046	b1	Fat	RIL	Abs.conc	154.236	C18:1.Abs.conc	304.069	126.785	FALSE
3	C18:1	WN049	b1	Fat	RIL	Abs.conc	183.147	C18:1.Abs.conc	336.054	81.4849	FALSE
3	C18:1	WN054	b1	Fat	RIL	Abs.conc	199.216	C18:1.Abs.conc	256.459	177.631	FALSE
3	C18:1	WN055	b1	Fat	RIL	Abs.conc	209.767	C18:1.Abs.conc			FALSE
3	C18:1	WN057	b1	Fat	RIL	Abs.conc	207.005	C18:1.Abs.conc	222.749	143.915	FALSE
3	C18:1	WN058	b1	Fat	RIL	Abs.conc	151.899	C18:1.Abs.conc	255.501	118.094	FALSE
3	C18:1	WN071	b1	Fat	RIL	Abs.conc	176.112	C18:1.Abs.conc	264.727	162.284	FALSE
3	C18:1	WN075	b1	Fat	RIL	Abs.conc	201.469	C18:1.Abs.conc	248.727	114.017	FALSE
3	C18:1	WN076	b1	Fat	RIL	Abs.conc	211.531	C18:1.Abs.conc	282.467	152.243	FALSE
3	C18:1	WN098	b1	Fat	RIL	Abs.conc	242.212	C18:1.Abs.conc	289.356	183.244	FALSE
3	C18:1	WN105	b1	Fat	RIL	Abs.conc	200.068	C18:1.Abs.conc	291.265	141.08	FALSE
3	C18:1	WN106	b1	Fat	RIL	Abs.conc	157.393	C18:1.Abs.conc	190.358	71.1313	FALSE
3	C18:1	WN107	b1	Fat	RIL	Abs.conc	108.504	C18:1.Abs.conc	300.663	78.443	FALSE
3	C18:1	WN109	b1	Fat	RIL	Abs.conc	169.684	C18:1.Abs.conc	229.009	142.774	FALSE
3	C18:1	WN110	b1	Fat	RIL	Abs.conc	161.481	C18:1.Abs.conc	355.001	106.911	FALSE
3	C18:1	WN112	b1	Fat	RIL	Abs.conc	177.689	C18:1.Abs.conc	273.784	95.4958	FALSE
3	C18:1	WN116	b1	Fat	RIL	Abs.conc	158.161	C18:1.Abs.conc	259.545	89.3145	FALSE
3	C18:1	WN124	b1	Fat	RIL	Abs.conc	144.488	C18:1.Abs.conc	254.907	88.4684	FALSE
3	C18:1	WN128	b1	Fat	RIL	Abs.conc	193.335	C18:1.Abs.conc	234.808	132.307	FALSE
3	C18:1	WN129	b1	Fat	RIL	Abs.conc	176.347	C18:1.Abs.conc	290.823	153.86	FALSE
3	C18:2	CB4856	b1	Fat	PL_CB4856	Abs.conc	40.9544	C18:2.Abs.conc	51.9337	18.7088	FALSE
3	C18:2	N2	b1	Fat	PL_N2	Abs.conc	36.8347	C18:2.Abs.conc	42.6201	12.8898	FALSE
3	C18:2	WN009	b1	Fat	RIL	Abs.conc	36.9136	C18:2.Abs.conc	44.0467	18.9384	FALSE
3	C18:2	WN013	b1	Fat	RIL	Abs.conc	56.2564	C18:2.Abs.conc	64.4622	14.2115	FALSE
3	C18:2	WN020	b1	Fat	RIL	Abs.conc	45.5926	C18:2.Abs.conc	49.8968	17.0687	FALSE
3	C18:2	WN021	b1	Fat	RIL	Abs.conc	31.2086	C18:2.Abs.conc	40.0931	9.98648	FALSE
3	C18:2	WN031	b1	Fat	RIL	Abs.conc	39.831	C18:2.Abs.conc			FALSE
3	C18:2	WN038	b1	Fat	RIL	Abs.conc	37.8348	C18:2.Abs.conc	45.9345	34.5211	FALSE
3	C18:2	WN046	b1	Fat	RIL	Abs.conc	37.3783	C18:2.Abs.conc	38.3157	34.0643	FALSE
3	C18:2	WN049	b1	Fat	RIL	Abs.conc	38.2805	C18:2.Abs.conc	56.0831	19.682	FALSE
3	C18:2	WN054	b1	Fat	RIL	Abs.conc	42.406	C18:2.Abs.conc	45.843	18.6051	FALSE
3	C18:2	WN055	b1	Fat	RIL	Abs.conc	45.1991	C18:2.Abs.conc			FALSE
3	C18:2	WN057	b1	Fat	RIL	Abs.conc	33.3017	C18:2.Abs.conc	37.2312	7.88574	FALSE
3	C18:2	WN058	b1	Fat	RIL	Abs.conc	44.5299	C18:2.Abs.conc	53.5826	15.0126	FALSE
3	C18:2	WN071	b1	Fat	RIL	Abs.conc	43.1847	C18:2.Abs.conc	52.0203	35.3087	FALSE
3	C18:2	WN075	b1	Fat	RIL	Abs.conc	48.9021	C18:2.Abs.conc	57.9513	4.39572	FALSE
3	C18:2	WN076	b1	Fat	RIL	Abs.conc	33.9551	C18:2.Abs.conc	42.0259	16.2091	FALSE
3	C18:2	WN098	b1	Fat	RIL	Abs.conc	57.0468	C18:2.Abs.conc	63.8648	17.2411	FALSE
3	C18:2	WN105	b1	Fat	RIL	Abs.conc	43.1229	C18:2.Abs.conc	49.4291	16.607	FALSE
3	C18:2	WN106	b1	Fat	RIL	Abs.conc	29.3759	C18:2.Abs.conc	37.4731	13.7855	FALSE
3	C18:2	WN107	b1	Fat	RIL	Abs.conc	59.7159	C18:2.Abs.conc	67.7841	10.2395	FALSE
3	C18:2	WN109	b1	Fat	RIL	Abs.conc	32.6753	C18:2.Abs.conc	40.9124	29.499	FALSE
3	C18:2	WN110	b1	Fat	RIL	Abs.conc	36.4031	C18:2.Abs.conc	82.5102	22.5581	FALSE
3	C18:2	WN112	b1	Fat	RIL	Abs.conc	32.3127	C18:2.Abs.conc	44.6819	7.82986	FALSE
3	C18:2	WN116	b1	Fat	RIL	Abs.conc	42.1303	C18:2.Abs.conc	48.5729	11.218	FALSE
3	C18:2	WN124	b1	Fat	RIL	Abs.conc	31.2922	C18:2.Abs.conc	41.4328	13.383	FALSE
3	C18:2	WN128	b1	Fat	RIL	Abs.conc	36.7636	C18:2.Abs.conc	38.9772	24.7104	FALSE
3	C18:2	WN129	b1	Fat	RIL	Abs.conc	39.8251	C18:2.Abs.conc	43.7492	15.2611	FALSE
3	C18:3	CB4856	b1	Fat	PL_CB4856	Abs.conc	8.61212	C18:3.Abs.conc	19.1151	5.58272	FALSE
3	C18:3	N2	b1	Fat	PL_N2	Abs.conc	10.9226	C18:3.Abs.conc	13.4658	6.2694	FALSE
3	C18:3	WN009	b1	Fat	RIL	Abs.conc	11.7409	C18:3.Abs.conc	19.8958	7.37933	FALSE
3	C18:3	WN013	b1	Fat	RIL	Abs.conc	11.9169	C18:3.Abs.conc	14.7453	7.09749	FALSE
3	C18:3	WN020	b1	Fat	RIL	Abs.conc	11.5478	C18:3.Abs.conc	14.3649	9.62216	FALSE
3	C18:3	WN021	b1	Fat	RIL	Abs.conc	9.05532	C18:3.Abs.conc	18.9177	3.62513	FALSE
3	C18:3	WN031	b1	Fat	RIL	Abs.conc	5.4897	C18:3.Abs.conc			FALSE
3	C18:3	WN038	b1	Fat	RIL	Abs.conc	11.1457	C18:3.Abs.conc	22.9018	8.30834	FALSE
3	C18:3	WN046	b1	Fat	RIL	Abs.conc	8.90678	C18:3.Abs.conc	12.2146	8.25177	FALSE
3	C18:3	WN049	b1	Fat	RIL	Abs.conc	9.60274	C18:3.Abs.conc	16.6264	3.09648	FALSE
3	C18:3	WN054	b1	Fat	RIL	Abs.conc	9.84814	C18:3.Abs.conc	13.2031	8.0977	FALSE
3	C18:3	WN055	b1	Fat	RIL	Abs.conc	11.3144	C18:3.Abs.conc			FALSE
3	C18:3	WN057	b1	Fat	RIL	Abs.conc	12.1551	C18:3.Abs.conc	13.9229	9.8865	FALSE
3	C18:3	WN058	b1	Fat	RIL	Abs.conc	11.8287	C18:3.Abs.conc	13.2859	7.90811	FALSE
3	C18:3	WN071	b1	Fat	RIL	Abs.conc	7.12172	C18:3.Abs.conc	15.2954	5.89544	FALSE
3	C18:3	WN075	b1	Fat	RIL	Abs.conc	12.6285	C18:3.Abs.conc	15.3323	4.01245	FALSE
3	C18:3	WN076	b1	Fat	RIL	Abs.conc	10.4859	C18:3.Abs.conc	12.4724	8.40556	FALSE
3	C18:3	WN098	b1	Fat	RIL	Abs.conc	12.9892	C18:3.Abs.conc	15.2176	10.1608	FALSE
3	C18:3	WN105	b1	Fat	RIL	Abs.conc	13.308	C18:3.Abs.conc	18.5734	11.8211	FALSE
3	C18:3	WN106	b1	Fat	RIL	Abs.conc	8.09342	C18:3.Abs.conc	9.61415	1.13653	FALSE
3	C18:3	WN107	b1	Fat	RIL	Abs.conc	13.2896	C18:3.Abs.conc	14.4	6.12755	FALSE
3	C18:3	WN109	b1	Fat	RIL	Abs.conc	10.5994	C18:3.Abs.conc	12.011	5.2914	FALSE
3	C18:3	WN110	b1	Fat	RIL	Abs.conc	6.42871	C18:3.Abs.conc	25.0897	2.23846	FALSE
3	C18:3	WN112	b1	Fat	RIL	Abs.conc	10.5743	C18:3.Abs.conc	18.0302	4.76635	FALSE
3	C18:3	WN116	b1	Fat	RIL	Abs.conc	12.7225	C18:3.Abs.conc	16.9502	4.69793	FALSE
3	C18:3	WN124	b1	Fat	RIL	Abs.conc	9.36342	C18:3.Abs.conc	14.1693	5.97476	FALSE
3	C18:3	WN128	b1	Fat	RIL	Abs.conc	10.6414	C18:3.Abs.conc	13.841	8.42013	FALSE
3	C18:3	WN129	b1	Fat	RIL	Abs.conc	10.742	C18:3.Abs.conc	14.7152	10.0587	FALSE
3	C19:0	CB4856	b1	Fat	PL_CB4856	Abs.conc	8.89109	C19:0.Abs.conc	12.2348	3.44723	FALSE
3	C19:0	N2	b1	Fat	PL_N2	Abs.conc	6.08508	C19:0.Abs.conc	6.91743	4.45303	FALSE
3	C19:0	WN009	b1	Fat	RIL	Abs.conc	7.65028	C19:0.Abs.conc	12.087	5.68439	FALSE
3	C19:0	WN013	b1	Fat	RIL	Abs.conc	7.1492	C19:0.Abs.conc	9.92669	4.69199	FALSE
3	C19:0	WN020	b1	Fat	RIL	Abs.conc	7.1952	C19:0.Abs.conc	11.456	5.90851	FALSE
3	C19:0	WN021	b1	Fat	RIL	Abs.conc	7.58467	C19:0.Abs.conc	14.6997	3.69101	FALSE
3	C19:0	WN031	b1	Fat	RIL	Abs.conc	7.11031	C19:0.Abs.conc			FALSE
3	C19:0	WN038	b1	Fat	RIL	Abs.conc	5.93169	C19:0.Abs.conc	13.2474	4.50178	FALSE
3	C19:0	WN046	b1	Fat	RIL	Abs.conc	7.53861	C19:0.Abs.conc	14.5631	6.45069	FALSE
3	C19:0	WN049	b1	Fat	RIL	Abs.conc	6.2703	C19:0.Abs.conc	13.6991	3.3231	FALSE
3	C19:0	WN054	b1	Fat	RIL	Abs.conc	6.42889	C19:0.Abs.conc	9.63088	5.75664	FALSE
3	C19:0	WN055	b1	Fat	RIL	Abs.conc	6.74973	C19:0.Abs.conc			FALSE
3	C19:0	WN057	b1	Fat	RIL	Abs.conc	8.13479	C19:0.Abs.conc	9.53871	7.06084	FALSE
3	C19:0	WN058	b1	Fat	RIL	Abs.conc	8.52314	C19:0.Abs.conc	10.5922	5.42232	FALSE
3	C19:0	WN071	b1	Fat	RIL	Abs.conc	7.57946	C19:0.Abs.conc	9.40465	7.07174	FALSE
3	C19:0	WN075	b1	Fat	RIL	Abs.conc	8.10257	C19:0.Abs.conc	9.49509	3.71633	FALSE
3	C19:0	WN076	b1	Fat	RIL	Abs.conc	7.5696	C19:0.Abs.conc	13.3882	4.5792	FALSE
3	C19:0	WN098	b1	Fat	RIL	Abs.conc	7.91617	C19:0.Abs.conc	10.196	6.51802	FALSE
3	C19:0	WN105	b1	Fat	RIL	Abs.conc	7.8478	C19:0.Abs.conc	11.38	6.71351	FALSE
3	C19:0	WN106	b1	Fat	RIL	Abs.conc	6.15867	C19:0.Abs.conc	9.78402	4.09341	FALSE
3	C19:0	WN107	b1	Fat	RIL	Abs.conc	5.82399	C19:0.Abs.conc	11.4625	4.77211	FALSE
3	C19:0	WN109	b1	Fat	RIL	Abs.conc	7.8304	C19:0.Abs.conc	13.2657	6.79266	FALSE
3	C19:0	WN110	b1	Fat	RIL	Abs.conc	6.11558	C19:0.Abs.conc	13.3316	3.73512	FALSE
3	C19:0	WN112	b1	Fat	RIL	Abs.conc	7.42728	C19:0.Abs.conc	11.7406	4.12329	FALSE
3	C19:0	WN116	b1	Fat	RIL	Abs.conc	6.4215	C19:0.Abs.conc	9.76198	3.47221	FALSE
3	C19:0	WN124	b1	Fat	RIL	Abs.conc	7.54193	C19:0.Abs.conc	12.6825	4.95959	FALSE
3	C19:0	WN128	b1	Fat	RIL	Abs.conc	7.26876	C19:0.Abs.conc	11.5005	5.88797	FALSE
3	C19:0	WN129	b1	Fat	RIL	Abs.conc	7.428	C19:0.Abs.conc	9.89776	6.53442	FALSE
3	C19:1	CB4856	b1	Fat	PL_CB4856	Abs.conc	24.9383	C19:1.Abs.conc	35.4973	15.2904	FALSE
3	C19:1	N2	b1	Fat	PL_N2	Abs.conc	26.0308	C19:1.Abs.conc	29.8994	18.0526	FALSE
3	C19:1	WN009	b1	Fat	RIL	Abs.conc	22.5631	C19:1.Abs.conc	41.8165	15.963	FALSE
3	C19:1	WN013	b1	Fat	RIL	Abs.conc	25.5971	C19:1.Abs.conc	37.6581	18.8028	FALSE
3	C19:1	WN020	b1	Fat	RIL	Abs.conc	23.1005	C19:1.Abs.conc	43.3142	17.0421	FALSE
3	C19:1	WN021	b1	Fat	RIL	Abs.conc	25.3604	C19:1.Abs.conc	45.6641	13.4473	FALSE
3	C19:1	WN031	b1	Fat	RIL	Abs.conc	19.3542	C19:1.Abs.conc			FALSE
3	C19:1	WN038	b1	Fat	RIL	Abs.conc	20.9931	C19:1.Abs.conc	48.9674	14.3407	FALSE
3	C19:1	WN046	b1	Fat	RIL	Abs.conc	22.292	C19:1.Abs.conc	46.6647	18.452	FALSE
3	C19:1	WN049	b1	Fat	RIL	Abs.conc	27.2546	C19:1.Abs.conc	55.5437	11.2397	FALSE
3	C19:1	WN054	b1	Fat	RIL	Abs.conc	22.2351	C19:1.Abs.conc	31.7915	20.0745	FALSE
3	C19:1	WN055	b1	Fat	RIL	Abs.conc	23.249	C19:1.Abs.conc			FALSE
3	C19:1	WN057	b1	Fat	RIL	Abs.conc	22.9901	C19:1.Abs.conc	32.9996	19.7352	FALSE
3	C19:1	WN058	b1	Fat	RIL	Abs.conc	28.3977	C19:1.Abs.conc	32.5328	18.7696	FALSE
3	C19:1	WN071	b1	Fat	RIL	Abs.conc	25.5568	C19:1.Abs.conc	32.591	23.602	FALSE
3	C19:1	WN075	b1	Fat	RIL	Abs.conc	28.6594	C19:1.Abs.conc	37.9967	16.1688	FALSE
3	C19:1	WN076	b1	Fat	RIL	Abs.conc	23.7923	C19:1.Abs.conc	45.6123	15.9022	FALSE
3	C19:1	WN098	b1	Fat	RIL	Abs.conc	30.2606	C19:1.Abs.conc	46.1169	25.1082	FALSE
3	C19:1	WN105	b1	Fat	RIL	Abs.conc	21.6359	C19:1.Abs.conc	32.7403	19.5788	FALSE
3	C19:1	WN106	b1	Fat	RIL	Abs.conc	21.544	C19:1.Abs.conc	27.3172	10.6462	FALSE
3	C19:1	WN107	b1	Fat	RIL	Abs.conc	30.1296	C19:1.Abs.conc	32.6647	24.0764	FALSE
3	C19:1	WN109	b1	Fat	RIL	Abs.conc	21.5638	C19:1.Abs.conc	32.0214	18.3056	FALSE
3	C19:1	WN110	b1	Fat	RIL	Abs.conc	21.4964	C19:1.Abs.conc	40.488	13.5874	FALSE
3	C19:1	WN112	b1	Fat	RIL	Abs.conc	23.601	C19:1.Abs.conc	39.8732	13.3312	FALSE
3	C19:1	WN116	b1	Fat	RIL	Abs.conc	24.1158	C19:1.Abs.conc	39.1418	12.0501	FALSE
3	C19:1	WN124	b1	Fat	RIL	Abs.conc	19.3222	C19:1.Abs.conc	33.5133	13.5407	FALSE
3	C19:1	WN128	b1	Fat	RIL	Abs.conc	21.7113	C19:1.Abs.conc	32.3649	17.6504	FALSE
3	C19:1	WN129	b1	Fat	RIL	Abs.conc	22.9111	C19:1.Abs.conc	34.6737	20.0794	FALSE
3	C20:0	CB4856	b1	Fat	PL_CB4856	Abs.conc	3.80307	C20:0.Abs.conc	6.67698	2.03086	FALSE
3	C20:0	N2	b1	Fat	PL_N2	Abs.conc	4.15017	C20:0.Abs.conc	4.52531	2.52935	FALSE
3	C20:0	WN009	b1	Fat	RIL	Abs.conc	4.16546	C20:0.Abs.conc	7.64244	3.045	FALSE
3	C20:0	WN013	b1	Fat	RIL	Abs.conc	4.15431	C20:0.Abs.conc	6.61625	2.80777	FALSE
3	C20:0	WN020	b1	Fat	RIL	Abs.conc	3.6807	C20:0.Abs.conc	5.97419	3.15669	FALSE
3	C20:0	WN021	b1	Fat	RIL	Abs.conc	3.47416	C20:0.Abs.conc	6.8496	1.76792	FALSE
3	C20:0	WN031	b1	Fat	RIL	Abs.conc	3.12753	C20:0.Abs.conc			FALSE
3	C20:0	WN038	b1	Fat	RIL	Abs.conc	3.38533	C20:0.Abs.conc	7.57976	2.52104	FALSE
3	C20:0	WN046	b1	Fat	RIL	Abs.conc	3.39786	C20:0.Abs.conc	6.84006	2.85985	FALSE
3	C20:0	WN049	b1	Fat	RIL	Abs.conc	3.77979	C20:0.Abs.conc	6.8968	1.72666	FALSE
3	C20:0	WN054	b1	Fat	RIL	Abs.conc	4.44209	C20:0.Abs.conc	5.91244	4.17526	FALSE
3	C20:0	WN055	b1	Fat	RIL	Abs.conc	3.96109	C20:0.Abs.conc			FALSE
3	C20:0	WN057	b1	Fat	RIL	Abs.conc	4.23789	C20:0.Abs.conc	5.52695	3.75546	FALSE
3	C20:0	WN058	b1	Fat	RIL	Abs.conc	3.94431	C20:0.Abs.conc	6.09595	2.91626	FALSE
3	C20:0	WN071	b1	Fat	RIL	Abs.conc	3.62611	C20:0.Abs.conc	5.95702	3.20907	FALSE
3	C20:0	WN075	b1	Fat	RIL	Abs.conc	3.97423	C20:0.Abs.conc	4.86404	2.54556	FALSE
3	C20:0	WN076	b1	Fat	RIL	Abs.conc	3.92884	C20:0.Abs.conc	5.86989	2.95287	FALSE
3	C20:0	WN098	b1	Fat	RIL	Abs.conc	4.074	C20:0.Abs.conc	6.00802	3.17738	FALSE
3	C20:0	WN105	b1	Fat	RIL	Abs.conc	4.15095	C20:0.Abs.conc	6.74068	3.53857	FALSE
3	C20:0	WN106	b1	Fat	RIL	Abs.conc	3.35733	C20:0.Abs.conc	4.30667	2.17634	FALSE
3	C20:0	WN107	b1	Fat	RIL	Abs.conc	5.33227	C20:0.Abs.conc	5.56514	4.20021	FALSE
3	C20:0	WN109	b1	Fat	RIL	Abs.conc	3.86412	C20:0.Abs.conc	4.78819	3.55874	FALSE
3	C20:0	WN110	b1	Fat	RIL	Abs.conc	3.54554	C20:0.Abs.conc	8.2858	2.26659	FALSE
3	C20:0	WN112	b1	Fat	RIL	Abs.conc	3.39154	C20:0.Abs.conc	6.66667	1.72855	FALSE
3	C20:0	WN116	b1	Fat	RIL	Abs.conc	3.84594	C20:0.Abs.conc	6.71751	1.97984	FALSE
3	C20:0	WN124	b1	Fat	RIL	Abs.conc	3.76909	C20:0.Abs.conc	6.50368	2.58458	FALSE
3	C20:0	WN128	b1	Fat	RIL	Abs.conc	4.13009	C20:0.Abs.conc	6.41327	3.26174	FALSE
3	C20:0	WN129	b1	Fat	RIL	Abs.conc	3.68497	C20:0.Abs.conc	6.06409	3.328	FALSE
3	C20:1	CB4856	b1	Fat	PL_CB4856	Abs.conc	9.35522	C20:1.Abs.conc	11.6169	2.07972	FALSE
3	C20:1	N2	b1	Fat	PL_N2	Abs.conc	8.387	C20:1.Abs.conc	8.7458	3.50032	FALSE
3	C20:1	WN009	b1	Fat	RIL	Abs.conc	8.04257	C20:1.Abs.conc	13.3536	4.59744	FALSE
3	C20:1	WN013	b1	Fat	RIL	Abs.conc	6.06196	C20:1.Abs.conc	9.8697	2.99393	FALSE
3	C20:1	WN020	b1	Fat	RIL	Abs.conc	6.11325	C20:1.Abs.conc	9.71307	4.8724	FALSE
3	C20:1	WN021	b1	Fat	RIL	Abs.conc	6.94839	C20:1.Abs.conc	12.9619	3.30363	FALSE
3	C20:1	WN031	b1	Fat	RIL	Abs.conc	9.14934	C20:1.Abs.conc			FALSE
3	C20:1	WN038	b1	Fat	RIL	Abs.conc	6.69712	C20:1.Abs.conc	12.7849	4.86743	FALSE
3	C20:1	WN046	b1	Fat	RIL	Abs.conc	6.02884	C20:1.Abs.conc	14.1877	4.28162	FALSE
3	C20:1	WN049	b1	Fat	RIL	Abs.conc	8.11228	C20:1.Abs.conc	11.7946	5.24261	FALSE
3	C20:1	WN054	b1	Fat	RIL	Abs.conc	7.18016	C20:1.Abs.conc	8.90051	5.97295	FALSE
3	C20:1	WN055	b1	Fat	RIL	Abs.conc	7.77603	C20:1.Abs.conc			FALSE
3	C20:1	WN057	b1	Fat	RIL	Abs.conc	8.21388	C20:1.Abs.conc	8.60918	5.83236	FALSE
3	C20:1	WN058	b1	Fat	RIL	Abs.conc	5.43406	C20:1.Abs.conc	8.19703	3.61725	FALSE
3	C20:1	WN071	b1	Fat	RIL	Abs.conc	8.68563	C20:1.Abs.conc	9.68831	5.20241	FALSE
3	C20:1	WN075	b1	Fat	RIL	Abs.conc	6.9912	C20:1.Abs.conc	8.10339	3.83121	FALSE
3	C20:1	WN076	b1	Fat	RIL	Abs.conc	7.7228	C20:1.Abs.conc	14.5775	3.64807	FALSE
3	C20:1	WN098	b1	Fat	RIL	Abs.conc	9.01261	C20:1.Abs.conc	9.77468	6.18981	FALSE
3	C20:1	WN105	b1	Fat	RIL	Abs.conc	7.53159	C20:1.Abs.conc	10.6887	5.1311	FALSE
3	C20:1	WN106	b1	Fat	RIL	Abs.conc	6.55968	C20:1.Abs.conc	9.62203	3.1749	FALSE
3	C20:1	WN107	b1	Fat	RIL	Abs.conc	4.45464	C20:1.Abs.conc	14.3988	2.47948	FALSE
3	C20:1	WN109	b1	Fat	RIL	Abs.conc	5.70497	C20:1.Abs.conc	13.5464	4.34012	FALSE
3	C20:1	WN110	b1	Fat	RIL	Abs.conc	5.77765	C20:1.Abs.conc	12.2705	2.72436	FALSE
3	C20:1	WN112	b1	Fat	RIL	Abs.conc	7.18301	C20:1.Abs.conc	12.0999	3.05902	FALSE
3	C20:1	WN116	b1	Fat	RIL	Abs.conc	6.57921	C20:1.Abs.conc	9.68628	3.27962	FALSE
3	C20:1	WN124	b1	Fat	RIL	Abs.conc	5.96358	C20:1.Abs.conc	10.3188	2.97235	FALSE
3	C20:1	WN128	b1	Fat	RIL	Abs.conc	8.09683	C20:1.Abs.conc	10.4404	5.08948	FALSE
3	C20:1	WN129	b1	Fat	RIL	Abs.conc	6.78057	C20:1.Abs.conc	11.4634	6.03062	FALSE
3	C20:3	CB4856	b1	Fat	PL_CB4856	Abs.conc	15.7599	C20:3.Abs.conc	28.1752	9.90776	FALSE
3	C20:3	N2	b1	Fat	PL_N2	Abs.conc	16.3752	C20:3.Abs.conc	21.1928	10.1508	FALSE
3	C20:3	WN009	b1	Fat	RIL	Abs.conc	17.6776	C20:3.Abs.conc	36.2018	10.5061	FALSE
3	C20:3	WN013	b1	Fat	RIL	Abs.conc	13.1531	C20:3.Abs.conc	25.0734	8.84855	FALSE
3	C20:3	WN020	b1	Fat	RIL	Abs.conc	14.9879	C20:3.Abs.conc	29.9694	11.4686	FALSE
3	C20:3	WN021	b1	Fat	RIL	Abs.conc	14.6515	C20:3.Abs.conc	36.4317	5.71946	FALSE
3	C20:3	WN031	b1	Fat	RIL	Abs.conc	12.6533	C20:3.Abs.conc			FALSE
3	C20:3	WN038	b1	Fat	RIL	Abs.conc	13.5076	C20:3.Abs.conc	35.9432	8.74005	FALSE
3	C20:3	WN046	b1	Fat	RIL	Abs.conc	13.4164	C20:3.Abs.conc	36.0168	10.0809	FALSE
3	C20:3	WN049	b1	Fat	RIL	Abs.conc	15.7296	C20:3.Abs.conc	36.3634	4.37133	FALSE
3	C20:3	WN054	b1	Fat	RIL	Abs.conc	15.5135	C20:3.Abs.conc	29.7364	12.8093	FALSE
3	C20:3	WN055	b1	Fat	RIL	Abs.conc	17.9946	C20:3.Abs.conc			FALSE
3	C20:3	WN057	b1	Fat	RIL	Abs.conc	21.1759	C20:3.Abs.conc	27.3017	18.7943	FALSE
3	C20:3	WN058	b1	Fat	RIL	Abs.conc	15.7886	C20:3.Abs.conc	22.3707	13.3632	FALSE
3	C20:3	WN071	b1	Fat	RIL	Abs.conc	11.7956	C20:3.Abs.conc	22.6235	10.209	FALSE
3	C20:3	WN075	b1	Fat	RIL	Abs.conc	15.7591	C20:3.Abs.conc	23.296	9.40634	FALSE
3	C20:3	WN076	b1	Fat	RIL	Abs.conc	15.7943	C20:3.Abs.conc	31.3138	11.5135	FALSE
3	C20:3	WN098	b1	Fat	RIL	Abs.conc	15.4368	C20:3.Abs.conc	27.0551	12.5159	FALSE
3	C20:3	WN105	b1	Fat	RIL	Abs.conc	17.916	C20:3.Abs.conc	33.3074	15.5232	FALSE
3	C20:3	WN106	b1	Fat	RIL	Abs.conc	14.1791	C20:3.Abs.conc	23.7982	6.75501	FALSE
3	C20:3	WN107	b1	Fat	RIL	Abs.conc	18.3646	C20:3.Abs.conc	25.6868	16.5339	FALSE
3	C20:3	WN109	b1	Fat	RIL	Abs.conc	15.7985	C20:3.Abs.conc	28.2364	12.4626	FALSE
3	C20:3	WN110	b1	Fat	RIL	Abs.conc	6.52104	C20:3.Abs.conc	31.6892	1.29881	FALSE
3	C20:3	WN112	b1	Fat	RIL	Abs.conc	17.0831	C20:3.Abs.conc	33.0538	9.0808	FALSE
3	C20:3	WN116	b1	Fat	RIL	Abs.conc	14.7311	C20:3.Abs.conc	28.6862	6.42059	FALSE
3	C20:3	WN124	b1	Fat	RIL	Abs.conc	16.2059	C20:3.Abs.conc	29.4799	10.7378	FALSE
3	C20:3	WN128	b1	Fat	RIL	Abs.conc	17.1924	C20:3.Abs.conc	28.9266	13.6078	FALSE
3	C20:3	WN129	b1	Fat	RIL	Abs.conc	16.4477	C20:3.Abs.conc	27.7622	14.6983	FALSE
3	C20:4	CB4856	b1	Fat	PL_CB4856	Abs.conc	22.8161	C20:4.Abs.conc	34.7125	12.562	FALSE
3	C20:4	N2	b1	Fat	PL_N2	Abs.conc	18.2704	C20:4.Abs.conc	24.3089	11.3064	FALSE
3	C20:4	WN009	b1	Fat	RIL	Abs.conc	17.6413	C20:4.Abs.conc	44.2169	8.75473	FALSE
3	C20:4	WN013	b1	Fat	RIL	Abs.conc	15.8528	C20:4.Abs.conc	27.8079	11.7105	FALSE
3	C20:4	WN020	b1	Fat	RIL	Abs.conc	16.6783	C20:4.Abs.conc	35.0522	12.7219	FALSE
3	C20:4	WN021	b1	Fat	RIL	Abs.conc	14.7759	C20:4.Abs.conc	43.47	4.61556	FALSE
3	C20:4	WN031	b1	Fat	RIL	Abs.conc	18.8844	C20:4.Abs.conc			FALSE
3	C20:4	WN038	b1	Fat	RIL	Abs.conc	15.4168	C20:4.Abs.conc	44.1149	9.47302	FALSE
3	C20:4	WN046	b1	Fat	RIL	Abs.conc	13.584	C20:4.Abs.conc	49.2427	8.1301	FALSE
3	C20:4	WN049	b1	Fat	RIL	Abs.conc	18.7804	C20:4.Abs.conc	46.6854	4.51358	FALSE
3	C20:4	WN054	b1	Fat	RIL	Abs.conc	16.1313	C20:4.Abs.conc	31.2121	13.4256	FALSE
3	C20:4	WN055	b1	Fat	RIL	Abs.conc	19.1791	C20:4.Abs.conc			FALSE
3	C20:4	WN057	b1	Fat	RIL	Abs.conc	20.9408	C20:4.Abs.conc	29.437	18.2035	FALSE
3	C20:4	WN058	b1	Fat	RIL	Abs.conc	16.3698	C20:4.Abs.conc	24.1634	13.4027	FALSE
3	C20:4	WN071	b1	Fat	RIL	Abs.conc	15.7592	C20:4.Abs.conc	24.4906	14.4498	FALSE
3	C20:4	WN075	b1	Fat	RIL	Abs.conc	18.7932	C20:4.Abs.conc	27.6394	9.14663	FALSE
3	C20:4	WN076	b1	Fat	RIL	Abs.conc	16.2496	C20:4.Abs.conc	42.9563	8.76305	FALSE
3	C20:4	WN098	b1	Fat	RIL	Abs.conc	17.58	C20:4.Abs.conc	33.1912	13.8191	FALSE
3	C20:4	WN105	b1	Fat	RIL	Abs.conc	18.0865	C20:4.Abs.conc	39.322	14.7567	FALSE
3	C20:4	WN106	b1	Fat	RIL	Abs.conc	16.0078	C20:4.Abs.conc	41.4479	5.51826	FALSE
3	C20:4	WN107	b1	Fat	RIL	Abs.conc	20.2875	C20:4.Abs.conc	39.1439	15.4344	FALSE
3	C20:4	WN109	b1	Fat	RIL	Abs.conc	16.1146	C20:4.Abs.conc	57.9179	8.0901	FALSE
3	C20:4	WN110	b1	Fat	RIL	Abs.conc	5.55939	C20:4.Abs.conc	42.7205	-1.70169	FALSE
3	C20:4	WN112	b1	Fat	RIL	Abs.conc	17.5717	C20:4.Abs.conc	36.9973	8.99578	FALSE
3	C20:4	WN116	b1	Fat	RIL	Abs.conc	19.0553	C20:4.Abs.conc	31.6924	8.6063	FALSE
3	C20:4	WN124	b1	Fat	RIL	Abs.conc	18.3695	C20:4.Abs.conc	33.0895	12.4515	FALSE
3	C20:4	WN128	b1	Fat	RIL	Abs.conc	16.6115	C20:4.Abs.conc	34.143	12.7917	FALSE
3	C20:4	WN129	b1	Fat	RIL	Abs.conc	19.6024	C20:4.Abs.conc	34.2525	17.2451	FALSE
3	C20:5	CB4856	b1	Fat	PL_CB4856	Abs.conc	27.3935	C20:5.Abs.conc	45.3917	12.2299	FALSE
3	C20:5	N2	b1	Fat	PL_N2	Abs.conc	23.9244	C20:5.Abs.conc	31.4004	14.3643	FALSE
3	C20:5	WN009	b1	Fat	RIL	Abs.conc	20.9674	C20:5.Abs.conc	47.7547	10.9265	FALSE
3	C20:5	WN013	b1	Fat	RIL	Abs.conc	22.2572	C20:5.Abs.conc	30.9721	17.742	FALSE
3	C20:5	WN020	b1	Fat	RIL	Abs.conc	22.2917	C20:5.Abs.conc	38.6516	18.6106	FALSE
3	C20:5	WN021	b1	Fat	RIL	Abs.conc	17.9607	C20:5.Abs.conc	49.1387	6.42344	FALSE
3	C20:5	WN031	b1	Fat	RIL	Abs.conc	20.5472	C20:5.Abs.conc			FALSE
3	C20:5	WN038	b1	Fat	RIL	Abs.conc	19.7764	C20:5.Abs.conc	50.2837	12.845	FALSE
3	C20:5	WN046	b1	Fat	RIL	Abs.conc	16.7446	C20:5.Abs.conc	56.6639	10.7885	FALSE
3	C20:5	WN049	b1	Fat	RIL	Abs.conc	24.8505	C20:5.Abs.conc	54.947	9.16712	FALSE
3	C20:5	WN054	b1	Fat	RIL	Abs.conc	18.6235	C20:5.Abs.conc	31.5551	16.3107	FALSE
3	C20:5	WN055	b1	Fat	RIL	Abs.conc	23.7031	C20:5.Abs.conc			FALSE
3	C20:5	WN057	b1	Fat	RIL	Abs.conc	22.8001	C20:5.Abs.conc	31.8961	19.6676	FALSE
3	C20:5	WN058	b1	Fat	RIL	Abs.conc	18.6711	C20:5.Abs.conc	26.2378	16.6397	FALSE
3	C20:5	WN071	b1	Fat	RIL	Abs.conc	19.065	C20:5.Abs.conc	31.8603	17.0777	FALSE
3	C20:5	WN075	b1	Fat	RIL	Abs.conc	23.9657	C20:5.Abs.conc	31.9287	9.24071	FALSE
3	C20:5	WN076	b1	Fat	RIL	Abs.conc	17.4988	C20:5.Abs.conc	45.6763	9.35529	FALSE
3	C20:5	WN098	b1	Fat	RIL	Abs.conc	23.8303	C20:5.Abs.conc	35.7224	19.1493	FALSE
3	C20:5	WN105	b1	Fat	RIL	Abs.conc	22.0941	C20:5.Abs.conc	46.1574	18.1547	FALSE
3	C20:5	WN106	b1	Fat	RIL	Abs.conc	19.1343	C20:5.Abs.conc	49.114	6.15234	FALSE
3	C20:5	WN107	b1	Fat	RIL	Abs.conc	22.474	C20:5.Abs.conc	42.9087	17.0625	FALSE
3	C20:5	WN109	b1	Fat	RIL	Abs.conc	17.5848	C20:5.Abs.conc	63.4247	8.6746	FALSE
3	C20:5	WN110	b1	Fat	RIL	Abs.conc	6.30816	C20:5.Abs.conc	53.5974	-2.58528	FALSE
3	C20:5	WN112	b1	Fat	RIL	Abs.conc	20.2744	C20:5.Abs.conc	41.0038	9.88716	FALSE
3	C20:5	WN116	b1	Fat	RIL	Abs.conc	31.5208	C20:5.Abs.conc	40.2957	10.9866	FALSE
3	C20:5	WN124	b1	Fat	RIL	Abs.conc	20.9905	C20:5.Abs.conc	36.346	14.7075	FALSE
3	C20:5	WN128	b1	Fat	RIL	Abs.conc	18.2185	C20:5.Abs.conc	36.4865	14.4718	FALSE
3	C20:5	WN129	b1	Fat	RIL	Abs.conc	24.2894	C20:5.Abs.conc	35.2724	22.5133	FALSE
3	C21:0	CB4856	b1	Fat	PL_CB4856	Abs.conc	4.21778	C21:0.Abs.conc	5.58924	1.01972	FALSE
3	C21:0	N2	b1	Fat	PL_N2	Abs.conc	3.37808	C21:0.Abs.conc	3.56776	2.02646	FALSE
3	C21:0	WN009	b1	Fat	RIL	Abs.conc	3.6223	C21:0.Abs.conc	5.00632	2.90837	FALSE
3	C21:0	WN013	b1	Fat	RIL	Abs.conc	3.41359	C21:0.Abs.conc	4.18714	2.37766	FALSE
3	C21:0	WN020	b1	Fat	RIL	Abs.conc	3.71829	C21:0.Abs.conc	5.13612	3.17584	FALSE
3	C21:0	WN021	b1	Fat	RIL	Abs.conc	3.72535	C21:0.Abs.conc	5.51911	2.35081	FALSE
3	C21:0	WN031	b1	Fat	RIL	Abs.conc	3.95428	C21:0.Abs.conc			FALSE
3	C21:0	WN038	b1	Fat	RIL	Abs.conc	3.33944	C21:0.Abs.conc	5.92128	2.81707	FALSE
3	C21:0	WN046	b1	Fat	RIL	Abs.conc	3.41966	C21:0.Abs.conc	6.95644	2.88987	FALSE
3	C21:0	WN049	b1	Fat	RIL	Abs.conc	3.60721	C21:0.Abs.conc	6.15561	2.36158	FALSE
3	C21:0	WN054	b1	Fat	RIL	Abs.conc	3.13999	C21:0.Abs.conc	3.56487	2.86603	FALSE
3	C21:0	WN055	b1	Fat	RIL	Abs.conc	3.0901	C21:0.Abs.conc			FALSE
3	C21:0	WN057	b1	Fat	RIL	Abs.conc	3.72682	C21:0.Abs.conc	4.7979	3.09717	FALSE
3	C21:0	WN058	b1	Fat	RIL	Abs.conc	4.27569	C21:0.Abs.conc	5.09028	2.36937	FALSE
3	C21:0	WN071	b1	Fat	RIL	Abs.conc	3.6473	C21:0.Abs.conc	3.87126	3.06002	FALSE
3	C21:0	WN075	b1	Fat	RIL	Abs.conc	3.95777	C21:0.Abs.conc	4.5816	1.29572	FALSE
3	C21:0	WN076	b1	Fat	RIL	Abs.conc	3.69353	C21:0.Abs.conc	5.99618	2.20032	FALSE
3	C21:0	WN098	b1	Fat	RIL	Abs.conc	3.74937	C21:0.Abs.conc	4.43533	2.73004	FALSE
3	C21:0	WN105	b1	Fat	RIL	Abs.conc	3.57256	C21:0.Abs.conc	5.86441	2.9832	FALSE
3	C21:0	WN106	b1	Fat	RIL	Abs.conc	2.91407	C21:0.Abs.conc	5.44145	2.00389	FALSE
3	C21:0	WN107	b1	Fat	RIL	Abs.conc	2.77249	C21:0.Abs.conc	5.7664	2.22228	FALSE
3	C21:0	WN109	b1	Fat	RIL	Abs.conc	3.29153	C21:0.Abs.conc	6.95017	2.75383	FALSE
3	C21:0	WN110	b1	Fat	RIL	Abs.conc	3.14181	C21:0.Abs.conc	5.2912	2.28773	FALSE
3	C21:0	WN112	b1	Fat	RIL	Abs.conc	3.59697	C21:0.Abs.conc	5.37633	1.64733	FALSE
3	C21:0	WN116	b1	Fat	RIL	Abs.conc	3.40859	C21:0.Abs.conc	4.73404	1.9268	FALSE
3	C21:0	WN124	b1	Fat	RIL	Abs.conc	3.68988	C21:0.Abs.conc	5.93511	2.45897	FALSE
3	C21:0	WN128	b1	Fat	RIL	Abs.conc	3.28338	C21:0.Abs.conc	5.15871	2.49697	FALSE
3	C21:0	WN129	b1	Fat	RIL	Abs.conc	3.71147	C21:0.Abs.conc	4.52732	2.93034	FALSE
3	C21:1	CB4856	b1	Fat	PL_CB4856	Abs.conc	1.46479	C21:1.Abs.conc	1.67896	0.192082	FALSE
3	C21:1	N2	b1	Fat	PL_N2	Abs.conc	0.986582	C21:1.Abs.conc	1.18012	0.200445	FALSE
3	C21:1	WN009	b1	Fat	RIL	Abs.conc	1.07136	C21:1.Abs.conc	1.66937	0.529152	FALSE
3	C21:1	WN013	b1	Fat	RIL	Abs.conc	0.771808	C21:1.Abs.conc	1.18879	0.0582931	FALSE
3	C21:1	WN020	b1	Fat	RIL	Abs.conc	0.968627	C21:1.Abs.conc	1.32657	0.55102	FALSE
3	C21:1	WN021	b1	Fat	RIL	Abs.conc	1.09847	C21:1.Abs.conc	1.52021	0.563934	FALSE
3	C21:1	WN031	b1	Fat	RIL	Abs.conc	1.27653	C21:1.Abs.conc			FALSE
3	C21:1	WN038	b1	Fat	RIL	Abs.conc	0.811224	C21:1.Abs.conc	2.14743	0.338842	FALSE
3	C21:1	WN046	b1	Fat	RIL	Abs.conc	0.808568	C21:1.Abs.conc	2.09044	0.491812	FALSE
3	C21:1	WN049	b1	Fat	RIL	Abs.conc	0.95902	C21:1.Abs.conc	1.43671	0.713482	FALSE
3	C21:1	WN054	b1	Fat	RIL	Abs.conc	0.673823	C21:1.Abs.conc	0.849464	0.260622	FALSE
3	C21:1	WN055	b1	Fat	RIL	Abs.conc	0.751295	C21:1.Abs.conc			FALSE
3	C21:1	WN057	b1	Fat	RIL	Abs.conc	0.915655	C21:1.Abs.conc	0.983978	0.622331	FALSE
3	C21:1	WN058	b1	Fat	RIL	Abs.conc	0.92997	C21:1.Abs.conc	1.22167	0.107279	FALSE
3	C21:1	WN071	b1	Fat	RIL	Abs.conc	1.15006	C21:1.Abs.conc	1.40674	0.162584	FALSE
3	C21:1	WN075	b1	Fat	RIL	Abs.conc	0.946844	C21:1.Abs.conc	1.10534	0.23762	FALSE
3	C21:1	WN076	b1	Fat	RIL	Abs.conc	1.00925	C21:1.Abs.conc	2.62274	-0.0955218	FALSE
3	C21:1	WN098	b1	Fat	RIL	Abs.conc	1.03278	C21:1.Abs.conc	1.14886	0.857085	FALSE
3	C21:1	WN105	b1	Fat	RIL	Abs.conc	1.0393	C21:1.Abs.conc	1.37671	0.637057	FALSE
3	C21:1	WN106	b1	Fat	RIL	Abs.conc	0.753517	C21:1.Abs.conc	1.5204	0.131964	FALSE
3	C21:1	WN107	b1	Fat	RIL	Abs.conc	0.63216	C21:1.Abs.conc	2.3044	0.140712	FALSE
3	C21:1	WN109	b1	Fat	RIL	Abs.conc	0.824033	C21:1.Abs.conc	2.49573	0.513288	FALSE
3	C21:1	WN110	b1	Fat	RIL	Abs.conc	0.716081	C21:1.Abs.conc	1.60039	0.124866	FALSE
3	C21:1	WN112	b1	Fat	RIL	Abs.conc	0.886356	C21:1.Abs.conc	2.00896	-0.175133	FALSE
3	C21:1	WN116	b1	Fat	RIL	Abs.conc	0.917918	C21:1.Abs.conc	1.3493	0.0537724	FALSE
3	C21:1	WN124	b1	Fat	RIL	Abs.conc	1.01559	C21:1.Abs.conc	1.61553	0.334727	FALSE
3	C21:1	WN128	b1	Fat	RIL	Abs.conc	0.977129	C21:1.Abs.conc	1.57083	0.42313	FALSE
3	C21:1	WN129	b1	Fat	RIL	Abs.conc	0.818069	C21:1.Abs.conc	1.40277	0.517233	FALSE
3	C22:0	CB4856	b1	Fat	PL_CB4856	Abs.conc	3.96858	C22:0.Abs.conc	4.63156	1.39618	FALSE
3	C22:0	N2	b1	Fat	PL_N2	Abs.conc		C22:0.Abs.conc	3.67974	1.95163	TRUE
3	C22:0	WN009	b1	Fat	RIL	Abs.conc	3.48704	C22:0.Abs.conc	4.69123	2.71437	FALSE
3	C22:0	WN013	b1	Fat	RIL	Abs.conc	3.48983	C22:0.Abs.conc	4.84434	1.98732	FALSE
3	C22:0	WN020	b1	Fat	RIL	Abs.conc	2.96158	C22:0.Abs.conc	4.83747	2.12293	FALSE
3	C22:0	WN021	b1	Fat	RIL	Abs.conc	3.1192	C22:0.Abs.conc	5.60649	1.42402	FALSE
3	C22:0	WN031	b1	Fat	RIL	Abs.conc	4.16211	C22:0.Abs.conc			FALSE
3	C22:0	WN038	b1	Fat	RIL	Abs.conc	3.41316	C22:0.Abs.conc	4.69239	3.19533	FALSE
3	C22:0	WN046	b1	Fat	RIL	Abs.conc	2.75772	C22:0.Abs.conc	5.45668	2.31803	FALSE
3	C22:0	WN049	b1	Fat	RIL	Abs.conc	3.69122	C22:0.Abs.conc	5.88242	2.0638	FALSE
3	C22:0	WN054	b1	Fat	RIL	Abs.conc	3.531	C22:0.Abs.conc	3.68476	3.10541	FALSE
3	C22:0	WN055	b1	Fat	RIL	Abs.conc	3.29597	C22:0.Abs.conc			FALSE
3	C22:0	WN057	b1	Fat	RIL	Abs.conc	3.68636	C22:0.Abs.conc	4.12441	2.69105	FALSE
3	C22:0	WN058	b1	Fat	RIL	Abs.conc	3.11186	C22:0.Abs.conc	5.57708	1.12391	FALSE
3	C22:0	WN071	b1	Fat	RIL	Abs.conc	3.78989	C22:0.Abs.conc	3.96258	3.01594	FALSE
3	C22:0	WN075	b1	Fat	RIL	Abs.conc	3.68755	C22:0.Abs.conc	4.17651	1.8368	FALSE
3	C22:0	WN076	b1	Fat	RIL	Abs.conc	3.12355	C22:0.Abs.conc	4.7725	2.21589	FALSE
3	C22:0	WN098	b1	Fat	RIL	Abs.conc	3.62208	C22:0.Abs.conc	4.41828	2.48472	FALSE
3	C22:0	WN105	b1	Fat	RIL	Abs.conc	3.46848	C22:0.Abs.conc	4.88362	2.66065	FALSE
3	C22:0	WN106	b1	Fat	RIL	Abs.conc	2.85599	C22:0.Abs.conc	3.93231	2.35394	FALSE
3	C22:0	WN107	b1	Fat	RIL	Abs.conc	4.1562	C22:0.Abs.conc	4.79595	3.26535	FALSE
3	C22:0	WN109	b1	Fat	RIL	Abs.conc	2.96355	C22:0.Abs.conc	5.77532	2.48198	FALSE
3	C22:0	WN110	b1	Fat	RIL	Abs.conc	3.12569	C22:0.Abs.conc	5.50696	2.3073	FALSE
3	C22:0	WN112	b1	Fat	RIL	Abs.conc	3.07745	C22:0.Abs.conc	4.77678	1.63958	FALSE
3	C22:0	WN116	b1	Fat	RIL	Abs.conc	3.41262	C22:0.Abs.conc	5.13235	1.52278	FALSE
3	C22:0	WN124	b1	Fat	RIL	Abs.conc	3.33512	C22:0.Abs.conc	4.41806	2.57004	FALSE
3	C22:0	WN128	b1	Fat	RIL	Abs.conc	3.43148	C22:0.Abs.conc	4.25086	2.54877	FALSE
3	C22:0	WN129	b1	Fat	RIL	Abs.conc	3.91315	C22:0.Abs.conc	4.59495	2.99726	FALSE
3	C22:1	CB4856	b1	Fat	PL_CB4856	Abs.conc	2.49459	C22:1.Abs.conc	3.48211	0.516413	FALSE
3	C22:1	N2	b1	Fat	PL_N2	Abs.conc	1.58326	C22:1.Abs.conc	2.72667	0.632185	FALSE
3	C22:1	WN009	b1	Fat	RIL	Abs.conc	1.75372	C22:1.Abs.conc	3.76338	0.781011	FALSE
3	C22:1	WN013	b1	Fat	RIL	Abs.conc	1.29951	C22:1.Abs.conc	2.84483	-0.137234	FALSE
3	C22:1	WN020	b1	Fat	RIL	Abs.conc	1.17321	C22:1.Abs.conc	2.45677	0.810675	FALSE
3	C22:1	WN021	b1	Fat	RIL	Abs.conc	0.898598	C22:1.Abs.conc	2.98604	0.34529	FALSE
3	C22:1	WN031	b1	Fat	RIL	Abs.conc	1.42202	C22:1.Abs.conc			FALSE
3	C22:1	WN038	b1	Fat	RIL	Abs.conc	1.00127	C22:1.Abs.conc	4.19403	0.114862	FALSE
3	C22:1	WN046	b1	Fat	RIL	Abs.conc	0.80056	C22:1.Abs.conc	4.52337	0.0116983	FALSE
3	C22:1	WN049	b1	Fat	RIL	Abs.conc	1.41788	C22:1.Abs.conc	3.23752	0.941779	FALSE
3	C22:1	WN054	b1	Fat	RIL	Abs.conc	1.95331	C22:1.Abs.conc	2.40124	0.781499	FALSE
3	C22:1	WN055	b1	Fat	RIL	Abs.conc	1.21394	C22:1.Abs.conc			FALSE
3	C22:1	WN057	b1	Fat	RIL	Abs.conc	1.15189	C22:1.Abs.conc	2.07937	0.877368	FALSE
3	C22:1	WN058	b1	Fat	RIL	Abs.conc	1.34024	C22:1.Abs.conc	2.08235	0.573667	FALSE
3	C22:1	WN071	b1	Fat	RIL	Abs.conc	1.63487	C22:1.Abs.conc	2.22003	0.715859	FALSE
3	C22:1	WN075	b1	Fat	RIL	Abs.conc	1.19445	C22:1.Abs.conc	1.6101	1.08236	FALSE
3	C22:1	WN076	b1	Fat	RIL	Abs.conc	1.07034	C22:1.Abs.conc	4.78797	-0.263754	FALSE
3	C22:1	WN098	b1	Fat	RIL	Abs.conc	1.7124	C22:1.Abs.conc	2.87342	1.5341	FALSE
3	C22:1	WN105	b1	Fat	RIL	Abs.conc	1.8301	C22:1.Abs.conc	3.09801	0.877866	FALSE
3	C22:1	WN106	b1	Fat	RIL	Abs.conc	0.837371	C22:1.Abs.conc	2.48676	0.20917	FALSE
3	C22:1	WN107	b1	Fat	RIL	Abs.conc	1.82474	C22:1.Abs.conc	4.06564	0.818911	FALSE
3	C22:1	WN109	b1	Fat	RIL	Abs.conc	0.926232	C22:1.Abs.conc	4.48747	0.242073	FALSE
3	C22:1	WN110	b1	Fat	RIL	Abs.conc	0.993428	C22:1.Abs.conc	3.94288	-0.174285	FALSE
3	C22:1	WN112	b1	Fat	RIL	Abs.conc	1.58751	C22:1.Abs.conc	3.70353	-0.18589	FALSE
3	C22:1	WN116	b1	Fat	RIL	Abs.conc	1.11482	C22:1.Abs.conc	2.49418	0.18687	FALSE
3	C22:1	WN124	b1	Fat	RIL	Abs.conc	1.12932	C22:1.Abs.conc	2.50171	0.55549	FALSE
3	C22:1	WN128	b1	Fat	RIL	Abs.conc	1.25213	C22:1.Abs.conc	2.66384	0.660352	FALSE
3	C22:1	WN129	b1	Fat	RIL	Abs.conc	2.68259	C22:1.Abs.conc	3.31115	1.67656	FALSE
3	C22:4	CB4856	b1	Fat	PL_CB4856	Abs.conc		C22:4.Abs.conc			FALSE
3	C22:4	N2	b1	Fat	PL_N2	Abs.conc		C22:4.Abs.conc	0.0622069	0.0604473
3	C22:4	WN009	b1	Fat	RIL	Abs.conc		C22:4.Abs.conc	#NUM!	#NUM!	FALSE
3	C22:4	WN013	b1	Fat	RIL	Abs.conc		C22:4.Abs.conc	#NUM!	#NUM!	FALSE
3	C22:4	WN020	b1	Fat	RIL	Abs.conc		C22:4.Abs.conc	#NUM!	#NUM!	FALSE
3	C22:4	WN021	b1	Fat	RIL	Abs.conc		C22:4.Abs.conc	0.112111	0.0536471
3	C22:4	WN031	b1	Fat	RIL	Abs.conc		C22:4.Abs.conc	#NUM!	#NUM!	FALSE
3	C22:4	WN038	b1	Fat	RIL	Abs.conc		C22:4.Abs.conc	#NUM!	#NUM!	FALSE
3	C22:4	WN046	b1	Fat	RIL	Abs.conc		C22:4.Abs.conc			FALSE
3	C22:4	WN049	b1	Fat	RIL	Abs.conc		C22:4.Abs.conc	#NUM!	#NUM!	FALSE
3	C22:4	WN054	b1	Fat	RIL	Abs.conc		C22:4.Abs.conc	#NUM!	#NUM!	FALSE
3	C22:4	WN055	b1	Fat	RIL	Abs.conc		C22:4.Abs.conc	#NUM!	#NUM!	FALSE
3	C22:4	WN057	b1	Fat	RIL	Abs.conc		C22:4.Abs.conc	#NUM!	#NUM!	FALSE
3	C22:4	WN058	b1	Fat	RIL	Abs.conc		C22:4.Abs.conc			FALSE
3	C22:4	WN071	b1	Fat	RIL	Abs.conc		C22:4.Abs.conc	#NUM!	#NUM!	FALSE
3	C22:4	WN075	b1	Fat	RIL	Abs.conc		C22:4.Abs.conc	0.109512	0.000222955
3	C22:4	WN076	b1	Fat	RIL	Abs.conc		C22:4.Abs.conc			FALSE
3	C22:4	WN098	b1	Fat	RIL	Abs.conc		C22:4.Abs.conc	0.108473	0.044114
3	C22:4	WN105	b1	Fat	RIL	Abs.conc		C22:4.Abs.conc	#NUM!	#NUM!	FALSE
3	C22:4	WN106	b1	Fat	RIL	Abs.conc		C22:4.Abs.conc	0.110966	0.0393638
3	C22:4	WN107	b1	Fat	RIL	Abs.conc		C22:4.Abs.conc	#NUM!	#NUM!	FALSE
3	C22:4	WN109	b1	Fat	RIL	Abs.conc		C22:4.Abs.conc			FALSE
3	C22:4	WN110	b1	Fat	RIL	Abs.conc		C22:4.Abs.conc	#NUM!	#NUM!	FALSE
3	C22:4	WN112	b1	Fat	RIL	Abs.conc		C22:4.Abs.conc			FALSE
3	C22:4	WN116	b1	Fat	RIL	Abs.conc		C22:4.Abs.conc			FALSE
3	C22:4	WN124	b1	Fat	RIL	Abs.conc		C22:4.Abs.conc	#NUM!	#NUM!	FALSE
3	C22:4	WN128	b1	Fat	RIL	Abs.conc		C22:4.Abs.conc	#NUM!	#NUM!	FALSE
3	C22:4	WN129	b1	Fat	RIL	Abs.conc		C22:4.Abs.conc	#NUM!	#NUM!	FALSE
3	C22:5	CB4856	b1	Fat	PL_CB4856	Abs.conc		C22:5.Abs.conc	0.0429902	0.0239704
3	C22:5	N2	b1	Fat	PL_N2	Abs.conc		C22:5.Abs.conc			FALSE
3	C22:5	WN009	b1	Fat	RIL	Abs.conc		C22:5.Abs.conc	#NUM!	#NUM!	FALSE
3	C22:5	WN013	b1	Fat	RIL	Abs.conc		C22:5.Abs.conc			FALSE
3	C22:5	WN020	b1	Fat	RIL	Abs.conc		C22:5.Abs.conc	0.0803232	0.0327501
3	C22:5	WN021	b1	Fat	RIL	Abs.conc		C22:5.Abs.conc	0.188549	0.00643771
3	C22:5	WN031	b1	Fat	RIL	Abs.conc		C22:5.Abs.conc	#NUM!	#NUM!	FALSE
3	C22:5	WN038	b1	Fat	RIL	Abs.conc		C22:5.Abs.conc	#NUM!	#NUM!	FALSE
3	C22:5	WN046	b1	Fat	RIL	Abs.conc		C22:5.Abs.conc			FALSE
3	C22:5	WN049	b1	Fat	RIL	Abs.conc		C22:5.Abs.conc	0.117902	0.0229565
3	C22:5	WN054	b1	Fat	RIL	Abs.conc		C22:5.Abs.conc			FALSE
3	C22:5	WN055	b1	Fat	RIL	Abs.conc		C22:5.Abs.conc	#NUM!	#NUM!	FALSE
3	C22:5	WN057	b1	Fat	RIL	Abs.conc		C22:5.Abs.conc	0.0547376	0.0332604
3	C22:5	WN058	b1	Fat	RIL	Abs.conc		C22:5.Abs.conc			FALSE
3	C22:5	WN071	b1	Fat	RIL	Abs.conc		C22:5.Abs.conc	#NUM!	#NUM!	FALSE
3	C22:5	WN075	b1	Fat	RIL	Abs.conc		C22:5.Abs.conc	#NUM!	#NUM!	FALSE
3	C22:5	WN076	b1	Fat	RIL	Abs.conc		C22:5.Abs.conc			FALSE
3	C22:5	WN098	b1	Fat	RIL	Abs.conc		C22:5.Abs.conc			FALSE
3	C22:5	WN105	b1	Fat	RIL	Abs.conc		C22:5.Abs.conc	0.0815913	0.0328436
3	C22:5	WN106	b1	Fat	RIL	Abs.conc		C22:5.Abs.conc	0.087978	0.0440546
3	C22:5	WN107	b1	Fat	RIL	Abs.conc		C22:5.Abs.conc	#NUM!	#NUM!	FALSE
3	C22:5	WN109	b1	Fat	RIL	Abs.conc		C22:5.Abs.conc	0.11267	0.0585709
3	C22:5	WN110	b1	Fat	RIL	Abs.conc		C22:5.Abs.conc	#NUM!	#NUM!	FALSE
3	C22:5	WN112	b1	Fat	RIL	Abs.conc		C22:5.Abs.conc			FALSE
3	C22:5	WN116	b1	Fat	RIL	Abs.conc		C22:5.Abs.conc			FALSE
3	C22:5	WN124	b1	Fat	RIL	Abs.conc		C22:5.Abs.conc			FALSE
3	C22:5	WN128	b1	Fat	RIL	Abs.conc		C22:5.Abs.conc	#NUM!	#NUM!	FALSE
3	C22:5	WN129	b1	Fat	RIL	Abs.conc		C22:5.Abs.conc	0.112091	0.0102544
3	C22:6	CB4856	b1	Fat	PL_CB4856	Abs.conc	0.482127	C22:6.Abs.conc	1.11267	-0.00215295	FALSE
3	C22:6	N2	b1	Fat	PL_N2	Abs.conc	0.505554	C22:6.Abs.conc	0.699161	0.212938	FALSE
3	C22:6	WN009	b1	Fat	RIL	Abs.conc	0.437924	C22:6.Abs.conc	0.642023	0.337706	FALSE
3	C22:6	WN013	b1	Fat	RIL	Abs.conc	0.485331	C22:6.Abs.conc	0.637882	0.232344	FALSE
3	C22:6	WN020	b1	Fat	RIL	Abs.conc	0.41646	C22:6.Abs.conc	0.698833	0.350491	FALSE
3	C22:6	WN021	b1	Fat	RIL	Abs.conc	0.411932	C22:6.Abs.conc	0.790939	0.241807	FALSE
3	C22:6	WN031	b1	Fat	RIL	Abs.conc	0.347019	C22:6.Abs.conc			FALSE
3	C22:6	WN038	b1	Fat	RIL	Abs.conc	0.503178	C22:6.Abs.conc	0.671256	0.438024	FALSE
3	C22:6	WN046	b1	Fat	RIL	Abs.conc	0.408773	C22:6.Abs.conc	0.65	0.361555	FALSE
3	C22:6	WN049	b1	Fat	RIL	Abs.conc	0.476882	C22:6.Abs.conc	0.884924	0.220848	FALSE
3	C22:6	WN054	b1	Fat	RIL	Abs.conc	0.405497	C22:6.Abs.conc	0.556263	0.329474	FALSE
3	C22:6	WN055	b1	Fat	RIL	Abs.conc	0.532276	C22:6.Abs.conc			FALSE
3	C22:6	WN057	b1	Fat	RIL	Abs.conc	0.520236	C22:6.Abs.conc	0.580128	0.44947	FALSE
3	C22:6	WN058	b1	Fat	RIL	Abs.conc	0.448836	C22:6.Abs.conc	1.39699	-0.259827	FALSE
3	C22:6	WN071	b1	Fat	RIL	Abs.conc	0.459447	C22:6.Abs.conc	0.559642	0.364333	FALSE
3	C22:6	WN075	b1	Fat	RIL	Abs.conc	0.555684	C22:6.Abs.conc	0.651083	0.28583	FALSE
3	C22:6	WN076	b1	Fat	RIL	Abs.conc	0.431873	C22:6.Abs.conc	0.673403	0.31782	FALSE
3	C22:6	WN098	b1	Fat	RIL	Abs.conc	0.370747	C22:6.Abs.conc	0.796499	0.24662	FALSE
3	C22:6	WN105	b1	Fat	RIL	Abs.conc	0.448932	C22:6.Abs.conc	0.693833	0.346159	FALSE
3	C22:6	WN106	b1	Fat	RIL	Abs.conc	0.384643	C22:6.Abs.conc	0.403881	0.257411	FALSE
3	C22:6	WN107	b1	Fat	RIL	Abs.conc	0.593788	C22:6.Abs.conc	0.678128	0.272363	FALSE
3	C22:6	WN109	b1	Fat	RIL	Abs.conc	0.482584	C22:6.Abs.conc	0.610913	0.384801	FALSE
3	C22:6	WN110	b1	Fat	RIL	Abs.conc	0.380915	C22:6.Abs.conc	0.683553	0.239895	FALSE
3	C22:6	WN112	b1	Fat	RIL	Abs.conc	0.382668	C22:6.Abs.conc	0.722392	0.198235	FALSE
3	C22:6	WN116	b1	Fat	RIL	Abs.conc	1.27014	C22:6.Abs.conc	1.52535	-0.230225	FALSE
3	C22:6	WN124	b1	Fat	RIL	Abs.conc	0.451504	C22:6.Abs.conc	0.59861	0.400943	FALSE
3	C22:6	WN128	b1	Fat	RIL	Abs.conc	0.520162	C22:6.Abs.conc	0.628917	0.351485	FALSE
3	C22:6	WN129	b1	Fat	RIL	Abs.conc	0.491809	C22:6.Abs.conc	0.667805	0.385571	FALSE
3	C23:0	CB4856	b1	Fat	PL_CB4856	Abs.conc	1.17276	C23:0.Abs.conc	1.33574	0.218019	FALSE
3	C23:0	N2	b1	Fat	PL_N2	Abs.conc	0.849818	C23:0.Abs.conc	0.958703	0.441473	FALSE
3	C23:0	WN009	b1	Fat	RIL	Abs.conc	0.960492	C23:0.Abs.conc	1.17736	0.658156	FALSE
3	C23:0	WN013	b1	Fat	RIL	Abs.conc	0.810731	C23:0.Abs.conc	1.06307	0.378648	FALSE
3	C23:0	WN020	b1	Fat	RIL	Abs.conc	0.884043	C23:0.Abs.conc	1.04587	0.761983	FALSE
3	C23:0	WN021	b1	Fat	RIL	Abs.conc	0.904706	C23:0.Abs.conc	1.47472	0.362729	FALSE
3	C23:0	WN031	b1	Fat	RIL	Abs.conc	1.20768	C23:0.Abs.conc			FALSE
3	C23:0	WN038	b1	Fat	RIL	Abs.conc	0.836935	C23:0.Abs.conc	1.35705	0.733002	FALSE
3	C23:0	WN046	b1	Fat	RIL	Abs.conc	0.766725	C23:0.Abs.conc	1.42648	0.660075	FALSE
3	C23:0	WN049	b1	Fat	RIL	Abs.conc	0.919255	C23:0.Abs.conc	1.40571	0.688457	FALSE
3	C23:0	WN054	b1	Fat	RIL	Abs.conc	0.733171	C23:0.Abs.conc	0.788324	0.607482	FALSE
3	C23:0	WN055	b1	Fat	RIL	Abs.conc	0.771333	C23:0.Abs.conc			FALSE
3	C23:0	WN057	b1	Fat	RIL	Abs.conc	0.985948	C23:0.Abs.conc	1.10405	0.522982	FALSE
3	C23:0	WN058	b1	Fat	RIL	Abs.conc	0.968286	C23:0.Abs.conc	1.55356	0.287151	FALSE
3	C23:0	WN071	b1	Fat	RIL	Abs.conc	1.03568	C23:0.Abs.conc	1.12547	0.54005	FALSE
3	C23:0	WN075	b1	Fat	RIL	Abs.conc	0.992557	C23:0.Abs.conc	1.14982	0.26749	FALSE
3	C23:0	WN076	b1	Fat	RIL	Abs.conc	0.882436	C23:0.Abs.conc	1.4911	0.455028	FALSE
3	C23:0	WN098	b1	Fat	RIL	Abs.conc	1.0721	C23:0.Abs.conc	1.20597	0.606369	FALSE
3	C23:0	WN105	b1	Fat	RIL	Abs.conc	0.933249	C23:0.Abs.conc	1.14646	0.731473	FALSE
3	C23:0	WN106	b1	Fat	RIL	Abs.conc	0.70524	C23:0.Abs.conc	1.31389	0.53032	FALSE
3	C23:0	WN107	b1	Fat	RIL	Abs.conc	0.742677	C23:0.Abs.conc	1.33978	0.587328	FALSE
3	C23:0	WN109	b1	Fat	RIL	Abs.conc	0.8106	C23:0.Abs.conc	1.89108	0.631107	FALSE
3	C23:0	WN110	b1	Fat	RIL	Abs.conc	0.926671	C23:0.Abs.conc	1.19754	0.544378	FALSE
3	C23:0	WN112	b1	Fat	RIL	Abs.conc	0.908251	C23:0.Abs.conc	1.21059	0.434112	FALSE
3	C23:0	WN116	b1	Fat	RIL	Abs.conc	0.886235	C23:0.Abs.conc	1.22416	0.335521	FALSE
3	C23:0	WN124	b1	Fat	RIL	Abs.conc	0.884327	C23:0.Abs.conc	1.23837	0.568701	FALSE
3	C23:0	WN128	b1	Fat	RIL	Abs.conc	0.82109	C23:0.Abs.conc	1.16533	0.486294	FALSE
3	C23:0	WN129	b1	Fat	RIL	Abs.conc	1.10948	C23:0.Abs.conc	1.32978	0.559745	FALSE
3	C23:1	CB4856	b1	Fat	PL_CB4856	Abs.conc	0.923453	C23:1.Abs.conc	1.12751	0.113762	FALSE
3	C23:1	N2	b1	Fat	PL_N2	Abs.conc	0.650524	C23:1.Abs.conc	1.05428	0.0875196	FALSE
3	C23:1	WN009	b1	Fat	RIL	Abs.conc	0.683614	C23:1.Abs.conc	1.32128	0.381765	FALSE
3	C23:1	WN013	b1	Fat	RIL	Abs.conc	0.447489	C23:1.Abs.conc	0.874819	0.1061	FALSE
3	C23:1	WN020	b1	Fat	RIL	Abs.conc	0.660236	C23:1.Abs.conc	0.897783	0.459542	FALSE
3	C23:1	WN021	b1	Fat	RIL	Abs.conc	0.577256	C23:1.Abs.conc	1.06294	0.403915	FALSE
3	C23:1	WN031	b1	Fat	RIL	Abs.conc	0.959811	C23:1.Abs.conc			FALSE
3	C23:1	WN038	b1	Fat	RIL	Abs.conc	0.531391	C23:1.Abs.conc	1.63866	0.189271	FALSE
3	C23:1	WN046	b1	Fat	RIL	Abs.conc	0.64016	C23:1.Abs.conc	1.55139	0.400277	FALSE
3	C23:1	WN049	b1	Fat	RIL	Abs.conc	0.671999	C23:1.Abs.conc	1.21888	0.54522	FALSE
3	C23:1	WN054	b1	Fat	RIL	Abs.conc	0.530561	C23:1.Abs.conc	0.669453	0.335863	FALSE
3	C23:1	WN055	b1	Fat	RIL	Abs.conc	0.593662	C23:1.Abs.conc			FALSE
3	C23:1	WN057	b1	Fat	RIL	Abs.conc	0.558803	C23:1.Abs.conc	0.64728	0.469231	FALSE
3	C23:1	WN058	b1	Fat	RIL	Abs.conc	0.730128	C23:1.Abs.conc	1.02091	0.092259	FALSE
3	C23:1	WN071	b1	Fat	RIL	Abs.conc	0.79872	C23:1.Abs.conc	0.930733	0.222547	FALSE
3	C23:1	WN075	b1	Fat	RIL	Abs.conc	0.691759	C23:1.Abs.conc	0.746699	0.378226	FALSE
3	C23:1	WN076	b1	Fat	RIL	Abs.conc	0.717591	C23:1.Abs.conc	1.94728	0.0757329	FALSE
3	C23:1	WN098	b1	Fat	RIL	Abs.conc	0.756476	C23:1.Abs.conc	0.90575	0.708787	FALSE
3	C23:1	WN105	b1	Fat	RIL	Abs.conc	0.783092	C23:1.Abs.conc	1.07467	0.622445	FALSE
3	C23:1	WN106	b1	Fat	RIL	Abs.conc	0.495692	C23:1.Abs.conc	1.24295	0.148919	FALSE
3	C23:1	WN107	b1	Fat	RIL	Abs.conc	0.588933	C23:1.Abs.conc	1.6364	0.214123	FALSE
3	C23:1	WN109	b1	Fat	RIL	Abs.conc	0.68424	C23:1.Abs.conc	1.75195	0.506377	FALSE
3	C23:1	WN110	b1	Fat	RIL	Abs.conc	0.513435	C23:1.Abs.conc	1.18969	0.160178	FALSE
3	C23:1	WN112	b1	Fat	RIL	Abs.conc	0.671766	C23:1.Abs.conc	1.35016	0.0878763	FALSE
3	C23:1	WN116	b1	Fat	RIL	Abs.conc	0.546367	C23:1.Abs.conc	0.889786	0.204256	FALSE
3	C23:1	WN124	b1	Fat	RIL	Abs.conc	0.564085	C23:1.Abs.conc	1.12047	0.212174	FALSE
3	C23:1	WN128	b1	Fat	RIL	Abs.conc	0.642115	C23:1.Abs.conc	1.15855	0.294502	FALSE
3	C23:1	WN129	b1	Fat	RIL	Abs.conc	0.704003	C23:1.Abs.conc	1.04177	0.565393	FALSE
3	C24:0	CB4856	b1	Fat	PL_CB4856	Abs.conc	0.497692	C24:0.Abs.conc	0.765261	0.150278	FALSE
3	C24:0	N2	b1	Fat	PL_N2	Abs.conc	0.501755	C24:0.Abs.conc	0.73609	0.14945	FALSE
3	C24:0	WN009	b1	Fat	RIL	Abs.conc	0.536121	C24:0.Abs.conc	1.0081	0.324514	FALSE
3	C24:0	WN013	b1	Fat	RIL	Abs.conc	0.450534	C24:0.Abs.conc	0.740938	0.157751	FALSE
3	C24:0	WN020	b1	Fat	RIL	Abs.conc	0.518277	C24:0.Abs.conc	0.804808	0.408763	FALSE
3	C24:0	WN021	b1	Fat	RIL	Abs.conc	0.485619	C24:0.Abs.conc	0.851172	0.140023	FALSE
3	C24:0	WN031	b1	Fat	RIL	Abs.conc	0.597489	C24:0.Abs.conc			FALSE
3	C24:0	WN038	b1	Fat	RIL	Abs.conc	0.401882	C24:0.Abs.conc	0.851147	0.301985	FALSE
3	C24:0	WN046	b1	Fat	RIL	Abs.conc	0.3347	C24:0.Abs.conc	0.895322	0.230536	FALSE
3	C24:0	WN049	b1	Fat	RIL	Abs.conc	0.564737	C24:0.Abs.conc	1.13054	0.279456	FALSE
3	C24:0	WN054	b1	Fat	RIL	Abs.conc	0.609581	C24:0.Abs.conc	0.667392	0.453557	FALSE
3	C24:0	WN055	b1	Fat	RIL	Abs.conc	0.527418	C24:0.Abs.conc			FALSE
3	C24:0	WN057	b1	Fat	RIL	Abs.conc	0.552297	C24:0.Abs.conc	0.585246	0.421803	FALSE
3	C24:0	WN058	b1	Fat	RIL	Abs.conc	0.423823	C24:0.Abs.conc	1.43397	-0.198843	FALSE
3	C24:0	WN071	b1	Fat	RIL	Abs.conc	0.539343	C24:0.Abs.conc	0.574033	0.453651	FALSE
3	C24:0	WN075	b1	Fat	RIL	Abs.conc	0.662731	C24:0.Abs.conc	0.779407	0.253723	FALSE
3	C24:0	WN076	b1	Fat	RIL	Abs.conc	0.593506	C24:0.Abs.conc	1.12117	0.221534	FALSE
3	C24:0	WN098	b1	Fat	RIL	Abs.conc	0.67106	C24:0.Abs.conc	0.74064	0.509532	FALSE
3	C24:0	WN105	b1	Fat	RIL	Abs.conc	0.562037	C24:0.Abs.conc	0.968304	0.377425	FALSE
3	C24:0	WN106	b1	Fat	RIL	Abs.conc	0.399994	C24:0.Abs.conc	0.745957	0.184355	FALSE
3	C24:0	WN107	b1	Fat	RIL	Abs.conc	0.655717	C24:0.Abs.conc	0.834894	0.441531	FALSE
3	C24:0	WN109	b1	Fat	RIL	Abs.conc	0.464164	C24:0.Abs.conc	0.936314	0.383587	FALSE
3	C24:0	WN110	b1	Fat	RIL	Abs.conc	0.49889	C24:0.Abs.conc	0.911258	0.244004	FALSE
3	C24:0	WN112	b1	Fat	RIL	Abs.conc	0.501622	C24:0.Abs.conc	0.777962	0.179596	FALSE
3	C24:0	WN116	b1	Fat	RIL	Abs.conc	0.528199	C24:0.Abs.conc	0.910654	0.13847	FALSE
3	C24:0	WN124	b1	Fat	RIL	Abs.conc	0.459049	C24:0.Abs.conc	0.623345	0.338832	FALSE
3	C24:0	WN128	b1	Fat	RIL	Abs.conc	0.475131	C24:0.Abs.conc	0.704765	0.31222	FALSE
3	C24:0	WN129	b1	Fat	RIL	Abs.conc	0.582676	C24:0.Abs.conc	0.848793	0.340179	FALSE
3	C24:1	CB4856	b1	Fat	PL_CB4856	Abs.conc	0.542236	C24:1.Abs.conc	0.772084	0.124902	FALSE
3	C24:1	N2	b1	Fat	PL_N2	Abs.conc	0.354712	C24:1.Abs.conc	0.609488	0.161857	FALSE
3	C24:1	WN009	b1	Fat	RIL	Abs.conc	0.445279	C24:1.Abs.conc	0.983825	0.258202	FALSE
3	C24:1	WN013	b1	Fat	RIL	Abs.conc	0.310897	C24:1.Abs.conc	0.675166	0.122081	FALSE
3	C24:1	WN020	b1	Fat	RIL	Abs.conc	0.298258	C24:1.Abs.conc	0.664733	0.208141	FALSE
3	C24:1	WN021	b1	Fat	RIL	Abs.conc	0.342391	C24:1.Abs.conc	0.851002	0.177842	FALSE
3	C24:1	WN031	b1	Fat	RIL	Abs.conc	0.499016	C24:1.Abs.conc			FALSE
3	C24:1	WN038	b1	Fat	RIL	Abs.conc	0.302457	C24:1.Abs.conc	1.02121	0.110552	FALSE
3	C24:1	WN046	b1	Fat	RIL	Abs.conc	0.290691	C24:1.Abs.conc	1.04787	0.114123	FALSE
3	C24:1	WN049	b1	Fat	RIL	Abs.conc	0.411662	C24:1.Abs.conc	0.891202	0.200044	FALSE
3	C24:1	WN054	b1	Fat	RIL	Abs.conc	0.318329	C24:1.Abs.conc	0.562788	0.22004	FALSE
3	C24:1	WN055	b1	Fat	RIL	Abs.conc	0.350504	C24:1.Abs.conc			FALSE
3	C24:1	WN057	b1	Fat	RIL	Abs.conc	0.373553	C24:1.Abs.conc	0.549661	0.278962	FALSE
3	C24:1	WN058	b1	Fat	RIL	Abs.conc	0.347837	C24:1.Abs.conc	0.588525	0.129614	FALSE
3	C24:1	WN071	b1	Fat	RIL	Abs.conc	0.471676	C24:1.Abs.conc	0.512236	0.30968	FALSE
3	C24:1	WN075	b1	Fat	RIL	Abs.conc	0.38678	C24:1.Abs.conc	0.443497	0.357905	FALSE
3	C24:1	WN076	b1	Fat	RIL	Abs.conc	0.365037	C24:1.Abs.conc	1.22447	0.0318756	FALSE
3	C24:1	WN098	b1	Fat	RIL	Abs.conc	0.414743	C24:1.Abs.conc	0.769738	0.345332	FALSE
3	C24:1	WN105	b1	Fat	RIL	Abs.conc	0.384941	C24:1.Abs.conc	0.976631	0.236618	FALSE
3	C24:1	WN106	b1	Fat	RIL	Abs.conc	0.31148	C24:1.Abs.conc	0.84649	0.106747	FALSE
3	C24:1	WN107	b1	Fat	RIL	Abs.conc	0.462704	C24:1.Abs.conc	1.02492	0.235198	FALSE
3	C24:1	WN109	b1	Fat	RIL	Abs.conc	0.368365	C24:1.Abs.conc	1.13338	0.232714	FALSE
3	C24:1	WN110	b1	Fat	RIL	Abs.conc	0.328053	C24:1.Abs.conc	0.844924	0.123286	FALSE
3	C24:1	WN112	b1	Fat	RIL	Abs.conc	0.387699	C24:1.Abs.conc	0.915758	0.0715525	FALSE
3	C24:1	WN116	b1	Fat	RIL	Abs.conc	0.354018	C24:1.Abs.conc	0.715719	0.133576	FALSE
3	C24:1	WN124	b1	Fat	RIL	Abs.conc	0.35419	C24:1.Abs.conc	0.677456	0.213104	FALSE
3	C24:1	WN128	b1	Fat	RIL	Abs.conc	0.343994	C24:1.Abs.conc	0.73734	0.177323	FALSE
3	C24:1	WN129	b1	Fat	RIL	Abs.conc	0.444815	C24:1.Abs.conc	0.933413	0.307659	FALSE
3	C24:4	CB4856	b1	Fat	PL_CB4856	Abs.conc	0.305297	C24:4.Abs.conc	0.509023	0.0181175	FALSE
3	C24:4	N2	b1	Fat	PL_N2	Abs.conc	0.288772	C24:4.Abs.conc	0.444711	0.0423898	FALSE
3	C24:4	WN009	b1	Fat	RIL	Abs.conc	0.223541	C24:4.Abs.conc	0.506924	0.0933357	FALSE
3	C24:4	WN013	b1	Fat	RIL	Abs.conc	0.202459	C24:4.Abs.conc	0.501325	0.11578	FALSE
3	C24:4	WN020	b1	Fat	RIL	Abs.conc	0.145847	C24:4.Abs.conc	0.830848	0.000908415	FALSE
3	C24:4	WN021	b1	Fat	RIL	Abs.conc	0.184707	C24:4.Abs.conc	0.874298	0.0477492	FALSE
3	C24:4	WN031	b1	Fat	RIL	Abs.conc	0.255786	C24:4.Abs.conc			FALSE
3	C24:4	WN038	b1	Fat	RIL	Abs.conc	0.254421	C24:4.Abs.conc	0.568605	0.110988	FALSE
3	C24:4	WN046	b1	Fat	RIL	Abs.conc	0.207676	C24:4.Abs.conc	0.626211	0.085424	FALSE
3	C24:4	WN049	b1	Fat	RIL	Abs.conc	0.274797	C24:4.Abs.conc	0.82269	0.139756	FALSE
3	C24:4	WN054	b1	Fat	RIL	Abs.conc	0.166166	C24:4.Abs.conc	0.590045	0.0821982	FALSE
3	C24:4	WN055	b1	Fat	RIL	Abs.conc	0.221062	C24:4.Abs.conc			FALSE
3	C24:4	WN057	b1	Fat	RIL	Abs.conc	0.219081	C24:4.Abs.conc	0.531847	0.16374	FALSE
3	C24:4	WN058	b1	Fat	RIL	Abs.conc	0.224503	C24:4.Abs.conc	0.417527	0.0662655	FALSE
3	C24:4	WN071	b1	Fat	RIL	Abs.conc	0.198863	C24:4.Abs.conc	0.509259	0.130948	FALSE
3	C24:4	WN075	b1	Fat	RIL	Abs.conc	0.22877	C24:4.Abs.conc	0.379638	0.19632	FALSE
3	C24:4	WN076	b1	Fat	RIL	Abs.conc		C24:4.Abs.conc	0.618174	0.111285
3	C24:4	WN098	b1	Fat	RIL	Abs.conc	0.196695	C24:4.Abs.conc	0.693154	0.0943217	FALSE
3	C24:4	WN105	b1	Fat	RIL	Abs.conc	0.188594	C24:4.Abs.conc	0.738275	0.108344	FALSE
3	C24:4	WN106	b1	Fat	RIL	Abs.conc	0.238101	C24:4.Abs.conc	0.508122	0.183606	FALSE
3	C24:4	WN107	b1	Fat	RIL	Abs.conc	0.260921	C24:4.Abs.conc	0.41809	0.19464	FALSE
3	C24:4	WN109	b1	Fat	RIL	Abs.conc	0.209439	C24:4.Abs.conc	0.91943	0.0653192	FALSE
3	C24:4	WN110	b1	Fat	RIL	Abs.conc	0.074985	C24:4.Abs.conc	0.623294	-0.0676652	FALSE
3	C24:4	WN112	b1	Fat	RIL	Abs.conc	0.231312	C24:4.Abs.conc	0.626393	0.0205413	FALSE
3	C24:4	WN116	b1	Fat	RIL	Abs.conc	0.385693	C24:4.Abs.conc	0.683486	0.099459	FALSE
3	C24:4	WN124	b1	Fat	RIL	Abs.conc	0.248668	C24:4.Abs.conc	0.78328	0.0982192	FALSE
3	C24:4	WN128	b1	Fat	RIL	Abs.conc	0.21256	C24:4.Abs.conc	0.604352	0.11058	FALSE
3	C24:4	WN129	b1	Fat	RIL	Abs.conc	0.354492	C24:4.Abs.conc	0.650129	0.109572	FALSE
3	C24:5	CB4856	b1	Fat	PL_CB4856	Abs.conc	0.21423	C24:5.Abs.conc	0.291009	0.103258	FALSE
3	C24:5	N2	b1	Fat	PL_N2	Abs.conc	0.187892	C24:5.Abs.conc	0.257819	0.0780699	FALSE
3	C24:5	WN009	b1	Fat	RIL	Abs.conc	0.134742	C24:5.Abs.conc	0.374484	0.0280605	FALSE
3	C24:5	WN013	b1	Fat	RIL	Abs.conc	0.109119	C24:5.Abs.conc	0.237955	0.00438986	FALSE
3	C24:5	WN020	b1	Fat	RIL	Abs.conc	0.124213	C24:5.Abs.conc	0.186449	0.0944421	FALSE
3	C24:5	WN021	b1	Fat	RIL	Abs.conc	0.158152	C24:5.Abs.conc	0.231689	0.131059	FALSE
3	C24:5	WN031	b1	Fat	RIL	Abs.conc	0.169694	C24:5.Abs.conc			FALSE
3	C24:5	WN038	b1	Fat	RIL	Abs.conc	0.128572	C24:5.Abs.conc	0.390594	0.0353585	FALSE
3	C24:5	WN046	b1	Fat	RIL	Abs.conc	0.142044	C24:5.Abs.conc	0.329002	0.0956099	FALSE
3	C24:5	WN049	b1	Fat	RIL	Abs.conc	0.17327	C24:5.Abs.conc	0.268266	0.0983203	FALSE
3	C24:5	WN054	b1	Fat	RIL	Abs.conc	0.149274	C24:5.Abs.conc	0.199489	0.0615137	FALSE
3	C24:5	WN055	b1	Fat	RIL	Abs.conc	0.135808	C24:5.Abs.conc			FALSE
3	C24:5	WN057	b1	Fat	RIL	Abs.conc	0.167074	C24:5.Abs.conc	0.176542	0.110461	FALSE
3	C24:5	WN058	b1	Fat	RIL	Abs.conc	0.141287	C24:5.Abs.conc	0.299246	-0.0130585	FALSE
3	C24:5	WN071	b1	Fat	RIL	Abs.conc	0.183769	C24:5.Abs.conc	0.223963	0.038521	FALSE
3	C24:5	WN075	b1	Fat	RIL	Abs.conc	0.174369	C24:5.Abs.conc	0.212358	0.0717633	FALSE
3	C24:5	WN076	b1	Fat	RIL	Abs.conc	0.175268	C24:5.Abs.conc	0.380563	0.0367093	FALSE
3	C24:5	WN098	b1	Fat	RIL	Abs.conc	0.166618	C24:5.Abs.conc	0.242229	0.145552	FALSE
3	C24:5	WN105	b1	Fat	RIL	Abs.conc	0.139165	C24:5.Abs.conc	0.273739	0.03599	FALSE
3	C24:5	WN106	b1	Fat	RIL	Abs.conc	0.122451	C24:5.Abs.conc	0.293926	0.0358506	FALSE
3	C24:5	WN107	b1	Fat	RIL	Abs.conc	0.160118	C24:5.Abs.conc	0.315293	0.0877497	FALSE
3	C24:5	WN109	b1	Fat	RIL	Abs.conc	0.131539	C24:5.Abs.conc	0.37662	0.0898389	FALSE
3	C24:5	WN110	b1	Fat	RIL	Abs.conc	0.12928	C24:5.Abs.conc	0.37369	-0.0082717	FALSE
3	C24:5	WN112	b1	Fat	RIL	Abs.conc	0.117484	C24:5.Abs.conc	0.312923	-0.0168613	FALSE
3	C24:5	WN116	b1	Fat	RIL	Abs.conc	0.161257	C24:5.Abs.conc	0.228073	0.0485612	FALSE
3	C24:5	WN124	b1	Fat	RIL	Abs.conc	0.14636	C24:5.Abs.conc	0.254478	0.0615446	FALSE
3	C24:5	WN128	b1	Fat	RIL	Abs.conc	0.177159	C24:5.Abs.conc	0.33228	0.0275176	FALSE
3	C24:5	WN129	b1	Fat	RIL	Abs.conc	0.144362	C24:5.Abs.conc	0.268184	0.10375	FALSE
3	C24:6	CB4856	b1	Fat	PL_CB4856	Abs.conc	7.16262	C24:6.Abs.conc	9.37427	3.29857	FALSE
3	C24:6	N2	b1	Fat	PL_N2	Abs.conc	6.09154	C24:6.Abs.conc	7.59747	2.51112	FALSE
3	C24:6	WN009	b1	Fat	RIL	Abs.conc	5.16775	C24:6.Abs.conc	10.0763	2.7916	FALSE
3	C24:6	WN013	b1	Fat	RIL	Abs.conc	4.90665	C24:6.Abs.conc	8.55302	0.395094	FALSE
3	C24:6	WN020	b1	Fat	RIL	Abs.conc	4.83248	C24:6.Abs.conc	6.57319	3.28842	FALSE
3	C24:6	WN021	b1	Fat	RIL	Abs.conc	4.88908	C24:6.Abs.conc	7.58436	3.63657	FALSE
3	C24:6	WN031	b1	Fat	RIL	Abs.conc	6.27017	C24:6.Abs.conc			FALSE
3	C24:6	WN038	b1	Fat	RIL	Abs.conc	4.81419	C24:6.Abs.conc	12.158	1.71925	FALSE
3	C24:6	WN046	b1	Fat	RIL	Abs.conc	4.65371	C24:6.Abs.conc	9.94416	3.03547	FALSE
3	C24:6	WN049	b1	Fat	RIL	Abs.conc	5.37708	C24:6.Abs.conc	7.43057	3.9658	FALSE
3	C24:6	WN054	b1	Fat	RIL	Abs.conc	4.69952	C24:6.Abs.conc	5.81484	2.52374	FALSE
3	C24:6	WN055	b1	Fat	RIL	Abs.conc	5.04911	C24:6.Abs.conc			FALSE
3	C24:6	WN057	b1	Fat	RIL	Abs.conc	5.06824	C24:6.Abs.conc	5.47718	3.86249	FALSE
3	C24:6	WN058	b1	Fat	RIL	Abs.conc	4.45285	C24:6.Abs.conc	9.08262	0.033058	FALSE
3	C24:6	WN071	b1	Fat	RIL	Abs.conc	6.65243	C24:6.Abs.conc	7.945	1.53406	FALSE
3	C24:6	WN075	b1	Fat	RIL	Abs.conc	5.54045	C24:6.Abs.conc	5.93595	3.26249	FALSE
3	C24:6	WN076	b1	Fat	RIL	Abs.conc	5.54354	C24:6.Abs.conc	12.4888	1.07194	FALSE
3	C24:6	WN098	b1	Fat	RIL	Abs.conc	5.52741	C24:6.Abs.conc	6.1973	5.04632	FALSE
3	C24:6	WN105	b1	Fat	RIL	Abs.conc	5.48315	C24:6.Abs.conc	7.67082	3.12232	FALSE
3	C24:6	WN106	b1	Fat	RIL	Abs.conc	4.25507	C24:6.Abs.conc	8.48433	1.06746	FALSE
3	C24:6	WN107	b1	Fat	RIL	Abs.conc	5.4535	C24:6.Abs.conc	11.4133	2.54288	FALSE
3	C24:6	WN109	b1	Fat	RIL	Abs.conc	4.6625	C24:6.Abs.conc	10.2202	3.52803	FALSE
3	C24:6	WN110	b1	Fat	RIL	Abs.conc	4.35028	C24:6.Abs.conc	10.9268	0.64165	FALSE
3	C24:6	WN112	b1	Fat	RIL	Abs.conc	4.14807	C24:6.Abs.conc	10.3288	-0.517825	FALSE
3	C24:6	WN116	b1	Fat	RIL	Abs.conc	6.18116	C24:6.Abs.conc	7.75353	1.14753	FALSE
3	C24:6	WN124	b1	Fat	RIL	Abs.conc	5.36388	C24:6.Abs.conc	8.14791	2.12868	FALSE
3	C24:6	WN128	b1	Fat	RIL	Abs.conc	5.21198	C24:6.Abs.conc	8.29905	2.39527	FALSE
3	C24:6	WN129	b1	Fat	RIL	Abs.conc	5.10806	C24:6.Abs.conc	8.57265	3.84633	FALSE
3	C25:0	CB4856	b1	Fat	PL_CB4856	Abs.conc	0.274847	C25:0.Abs.conc	0.362738	0.116611	FALSE
3	C25:0	N2	b1	Fat	PL_N2	Abs.conc	0.22444	C25:0.Abs.conc	0.324174	0.165167	FALSE
3	C25:0	WN009	b1	Fat	RIL	Abs.conc	0.249319	C25:0.Abs.conc	0.433658	0.195654	FALSE
3	C25:0	WN013	b1	Fat	RIL	Abs.conc	0.144825	C25:0.Abs.conc	0.319536	0.0925718	FALSE
3	C25:0	WN020	b1	Fat	RIL	Abs.conc	0.196651	C25:0.Abs.conc	0.461941	0.125679	FALSE
3	C25:0	WN021	b1	Fat	RIL	Abs.conc	0.210656	C25:0.Abs.conc	0.369708	0.0926105	FALSE
3	C25:0	WN031	b1	Fat	RIL	Abs.conc	0.284697	C25:0.Abs.conc			FALSE
3	C25:0	WN038	b1	Fat	RIL	Abs.conc	0.187349	C25:0.Abs.conc	0.425307	0.122359	FALSE
3	C25:0	WN046	b1	Fat	RIL	Abs.conc	0.159193	C25:0.Abs.conc	0.516538	0.106898	FALSE
3	C25:0	WN049	b1	Fat	RIL	Abs.conc	0.288286	C25:0.Abs.conc	0.62668	0.112629	FALSE
3	C25:0	WN054	b1	Fat	RIL	Abs.conc	0.242581	C25:0.Abs.conc	0.253039	0.216116	FALSE
3	C25:0	WN055	b1	Fat	RIL	Abs.conc	0.196144	C25:0.Abs.conc			FALSE
3	C25:0	WN057	b1	Fat	RIL	Abs.conc	0.255868	C25:0.Abs.conc	0.324919	0.148489	FALSE
3	C25:0	WN058	b1	Fat	RIL	Abs.conc	0.147669	C25:0.Abs.conc	0.365202	0.108791	FALSE
3	C25:0	WN071	b1	Fat	RIL	Abs.conc	0.220609	C25:0.Abs.conc	0.277585	0.211763	FALSE
3	C25:0	WN075	b1	Fat	RIL	Abs.conc	0.295764	C25:0.Abs.conc	0.344279	0.0979712	FALSE
3	C25:0	WN076	b1	Fat	RIL	Abs.conc	0.281031	C25:0.Abs.conc	0.531087	0.112796	FALSE
3	C25:0	WN098	b1	Fat	RIL	Abs.conc	0.299039	C25:0.Abs.conc	0.354368	0.205084	FALSE
3	C25:0	WN105	b1	Fat	RIL	Abs.conc	0.231784	C25:0.Abs.conc	0.48613	0.191614	FALSE
3	C25:0	WN106	b1	Fat	RIL	Abs.conc	0.164793	C25:0.Abs.conc	0.471221	0.0771566	FALSE
3	C25:0	WN107	b1	Fat	RIL	Abs.conc	0.206724	C25:0.Abs.conc	0.467105	0.0844971	FALSE
3	C25:0	WN109	b1	Fat	RIL	Abs.conc	0.224815	C25:0.Abs.conc	0.530529	0.177286	FALSE
3	C25:0	WN110	b1	Fat	RIL	Abs.conc	0.228211	C25:0.Abs.conc	0.357393	0.175738	FALSE
3	C25:0	WN112	b1	Fat	RIL	Abs.conc	0.249798	C25:0.Abs.conc	0.425122	0.105848	FALSE
3	C25:0	WN116	b1	Fat	RIL	Abs.conc	0.234503	C25:0.Abs.conc	0.343828	0.140114	FALSE
3	C25:0	WN124	b1	Fat	RIL	Abs.conc	0.230812	C25:0.Abs.conc	0.335226	0.131519	FALSE
3	C25:0	WN128	b1	Fat	RIL	Abs.conc	0.204643	C25:0.Abs.conc	0.318706	0.151926	FALSE
3	C25:0	WN129	b1	Fat	RIL	Abs.conc	0.246312	C25:0.Abs.conc	0.313826	0.228906	FALSE
3	C25:1	CB4856	b1	Fat	PL_CB4856	Abs.conc	0.0777695	C25:1.Abs.conc	0.158714	0.0141371	FALSE
3	C25:1	N2	b1	Fat	PL_N2	Abs.conc		C25:1.Abs.conc	0.133187	0.0111106
3	C25:1	WN009	b1	Fat	RIL	Abs.conc	0.0416477	C25:1.Abs.conc	0.108424	0.0193814	FALSE
3	C25:1	WN013	b1	Fat	RIL	Abs.conc		C25:1.Abs.conc	0.442857	-0.16538
3	C25:1	WN020	b1	Fat	RIL	Abs.conc		C25:1.Abs.conc	0.133887	0.0552128
3	C25:1	WN021	b1	Fat	RIL	Abs.conc		C25:1.Abs.conc	0.187464	0.0056632
3	C25:1	WN031	b1	Fat	RIL	Abs.conc	0.0797689	C25:1.Abs.conc			FALSE
3	C25:1	WN038	b1	Fat	RIL	Abs.conc		C25:1.Abs.conc	0.130738	0.0524644
3	C25:1	WN046	b1	Fat	RIL	Abs.conc	0.0433662	C25:1.Abs.conc	0.189045	0.0213527	FALSE
3	C25:1	WN049	b1	Fat	RIL	Abs.conc	0.0438954	C25:1.Abs.conc	0.104197	0.00826047	FALSE
3	C25:1	WN054	b1	Fat	RIL	Abs.conc		C25:1.Abs.conc	0.111506	-0.00281585
3	C25:1	WN055	b1	Fat	RIL	Abs.conc	0.051789	C25:1.Abs.conc			FALSE
3	C25:1	WN057	b1	Fat	RIL	Abs.conc	0.0555492	C25:1.Abs.conc	0.0828636	0.0327129	FALSE
3	C25:1	WN058	b1	Fat	RIL	Abs.conc	0.0505387	C25:1.Abs.conc	0.108663	0.0239626	FALSE
3	C25:1	WN071	b1	Fat	RIL	Abs.conc	0.0569761	C25:1.Abs.conc	0.089215	0.0502774	FALSE
3	C25:1	WN075	b1	Fat	RIL	Abs.conc	0.0623759	C25:1.Abs.conc	0.0725168	0.0402812	FALSE
3	C25:1	WN076	b1	Fat	RIL	Abs.conc	0.0585624	C25:1.Abs.conc	0.159672	-0.0158026	FALSE
3	C25:1	WN098	b1	Fat	RIL	Abs.conc	0.0304437	C25:1.Abs.conc	0.0884203	0.0203649	FALSE
3	C25:1	WN105	b1	Fat	RIL	Abs.conc	0.0525247	C25:1.Abs.conc	0.652716	-0.263587	FALSE
3	C25:1	WN106	b1	Fat	RIL	Abs.conc	0.0312226	C25:1.Abs.conc	0.33526	-0.0759033	FALSE
3	C25:1	WN107	b1	Fat	RIL	Abs.conc	0.0470025	C25:1.Abs.conc	0.140416	0.0138581	FALSE
3	C25:1	WN109	b1	Fat	RIL	Abs.conc	0.0549497	C25:1.Abs.conc	0.199045	0.0276681	FALSE
3	C25:1	WN110	b1	Fat	RIL	Abs.conc		C25:1.Abs.conc	0.0929745	0.0762466
3	C25:1	WN112	b1	Fat	RIL	Abs.conc	0.0466953	C25:1.Abs.conc	0.165657	0.0241825	FALSE
3	C25:1	WN116	b1	Fat	RIL	Abs.conc	0.043654	C25:1.Abs.conc	0.0942707	0.0190106	FALSE
3	C25:1	WN124	b1	Fat	RIL	Abs.conc		C25:1.Abs.conc	0.0884687	0.0211026
3	C25:1	WN128	b1	Fat	RIL	Abs.conc	0.0510253	C25:1.Abs.conc	0.114771	0.0398191	FALSE
3	C25:1	WN129	b1	Fat	RIL	Abs.conc	0.0546957	C25:1.Abs.conc	0.0784929	0.0485395	FALSE
3	C26:0	CB4856	b1	Fat	PL_CB4856	Abs.conc	0.294936	C26:0.Abs.conc	0.608453	0.160585	FALSE
3	C26:0	N2	b1	Fat	PL_N2	Abs.conc	0.308699	C26:0.Abs.conc	0.587072	0.207689	FALSE
3	C26:0	WN009	b1	Fat	RIL	Abs.conc	0.292738	C26:0.Abs.conc	0.808144	0.197844	FALSE
3	C26:0	WN013	b1	Fat	RIL	Abs.conc	0.238978	C26:0.Abs.conc	0.737089	0.0276599	FALSE
3	C26:0	WN020	b1	Fat	RIL	Abs.conc	0.270507	C26:0.Abs.conc	0.762066	0.17398	FALSE
3	C26:0	WN021	b1	Fat	RIL	Abs.conc	0.232435	C26:0.Abs.conc	0.887884	0.0315779	FALSE
3	C26:0	WN031	b1	Fat	RIL	Abs.conc	0.3261	C26:0.Abs.conc			FALSE
3	C26:0	WN038	b1	Fat	RIL	Abs.conc	0.253858	C26:0.Abs.conc	0.717764	0.173228	FALSE
3	C26:0	WN046	b1	Fat	RIL	Abs.conc	0.169359	C26:0.Abs.conc	0.814384	0.068678	FALSE
3	C26:0	WN049	b1	Fat	RIL	Abs.conc	0.390351	C26:0.Abs.conc	0.939062	0.158053	FALSE
3	C26:0	WN054	b1	Fat	RIL	Abs.conc	0.31287	C26:0.Abs.conc	0.502395	0.276311	FALSE
3	C26:0	WN055	b1	Fat	RIL	Abs.conc	0.296064	C26:0.Abs.conc			FALSE
3	C26:0	WN057	b1	Fat	RIL	Abs.conc	0.24545	C26:0.Abs.conc	0.55962	0.199543	FALSE
3	C26:0	WN058	b1	Fat	RIL	Abs.conc	0.250827	C26:0.Abs.conc	0.476581	0.211209	FALSE
3	C26:0	WN071	b1	Fat	RIL	Abs.conc	0.304682	C26:0.Abs.conc	0.661743	0.198256	FALSE
3	C26:0	WN075	b1	Fat	RIL	Abs.conc	0.309213	C26:0.Abs.conc	0.450595	0.182678	FALSE
3	C26:0	WN076	b1	Fat	RIL	Abs.conc	0.272569	C26:0.Abs.conc	0.788421	0.0819742	FALSE
3	C26:0	WN098	b1	Fat	RIL	Abs.conc	0.305958	C26:0.Abs.conc	0.60473	0.247424	FALSE
3	C26:0	WN105	b1	Fat	RIL	Abs.conc	0.286996	C26:0.Abs.conc	1.07332	0.100613	FALSE
3	C26:0	WN106	b1	Fat	RIL	Abs.conc	0.225066	C26:0.Abs.conc	0.75608	0.112123	FALSE
3	C26:0	WN107	b1	Fat	RIL	Abs.conc	0.279525	C26:0.Abs.conc	0.708102	0.180216	FALSE
3	C26:0	WN109	b1	Fat	RIL	Abs.conc	0.197741	C26:0.Abs.conc	0.882454	0.0896472	FALSE
3	C26:0	WN110	b1	Fat	RIL	Abs.conc	0.254415	C26:0.Abs.conc	0.692407	0.153098	FALSE
3	C26:0	WN112	b1	Fat	RIL	Abs.conc	0.300699	C26:0.Abs.conc	0.689795	0.153942	FALSE
3	C26:0	WN116	b1	Fat	RIL	Abs.conc	0.330387	C26:0.Abs.conc	0.769484	0.0935769	FALSE
3	C26:0	WN124	b1	Fat	RIL	Abs.conc	0.215076	C26:0.Abs.conc	0.571788	0.127075	FALSE
3	C26:0	WN128	b1	Fat	RIL	Abs.conc	0.251461	C26:0.Abs.conc	0.601563	0.183645	FALSE
3	C26:0	WN129	b1	Fat	RIL	Abs.conc	0.288106	C26:0.Abs.conc	0.541836	0.248108	FALSE
3	C26:1	CB4856	b1	Fat	PL_CB4856	Abs.conc		C26:1.Abs.conc	0.185237	-0.0071887
3	C26:1	N2	b1	Fat	PL_N2	Abs.conc		C26:1.Abs.conc	0.165032	-0.0342929
3	C26:1	WN009	b1	Fat	RIL	Abs.conc		C26:1.Abs.conc	#NUM!	#NUM!	FALSE
3	C26:1	WN013	b1	Fat	RIL	Abs.conc		C26:1.Abs.conc			FALSE
3	C26:1	WN020	b1	Fat	RIL	Abs.conc		C26:1.Abs.conc	0.0856576	0.0726043
3	C26:1	WN021	b1	Fat	RIL	Abs.conc		C26:1.Abs.conc	0.136463	-0.0182023
3	C26:1	WN031	b1	Fat	RIL	Abs.conc		C26:1.Abs.conc	#NUM!	#NUM!	FALSE
3	C26:1	WN038	b1	Fat	RIL	Abs.conc		C26:1.Abs.conc	0.0864238	0.0240748
3	C26:1	WN046	b1	Fat	RIL	Abs.conc		C26:1.Abs.conc	0.162664	-0.0240873
3	C26:1	WN049	b1	Fat	RIL	Abs.conc		C26:1.Abs.conc	0.121302	-0.00445126
3	C26:1	WN054	b1	Fat	RIL	Abs.conc		C26:1.Abs.conc	0.0768337	0.0262175
3	C26:1	WN055	b1	Fat	RIL	Abs.conc		C26:1.Abs.conc	#NUM!	#NUM!	FALSE
3	C26:1	WN057	b1	Fat	RIL	Abs.conc		C26:1.Abs.conc			FALSE
3	C26:1	WN058	b1	Fat	RIL	Abs.conc		C26:1.Abs.conc	0.23659	-0.0399185
3	C26:1	WN071	b1	Fat	RIL	Abs.conc		C26:1.Abs.conc	0.0837461	0.0272084
3	C26:1	WN075	b1	Fat	RIL	Abs.conc		C26:1.Abs.conc	#NUM!	#NUM!	FALSE
3	C26:1	WN076	b1	Fat	RIL	Abs.conc		C26:1.Abs.conc	0.0930584	0.0129656
3	C26:1	WN098	b1	Fat	RIL	Abs.conc		C26:1.Abs.conc			FALSE
3	C26:1	WN105	b1	Fat	RIL	Abs.conc		C26:1.Abs.conc	0.746573	-0.336472
3	C26:1	WN106	b1	Fat	RIL	Abs.conc		C26:1.Abs.conc	0.25717	0.0617447
3	C26:1	WN107	b1	Fat	RIL	Abs.conc	0.0338715	C26:1.Abs.conc	0.0671271	0.0209128	FALSE
3	C26:1	WN109	b1	Fat	RIL	Abs.conc		C26:1.Abs.conc	0.0998664	0.0064653
3	C26:1	WN110	b1	Fat	RIL	Abs.conc		C26:1.Abs.conc	0.104142	0.0322092
3	C26:1	WN112	b1	Fat	RIL	Abs.conc		C26:1.Abs.conc	0.0944825	0.0109468
3	C26:1	WN116	b1	Fat	RIL	Abs.conc	0.0480265	C26:1.Abs.conc	0.0599229	0.0275975	FALSE
3	C26:1	WN124	b1	Fat	RIL	Abs.conc		C26:1.Abs.conc	0.0676417	0.0139365
3	C26:1	WN128	b1	Fat	RIL	Abs.conc		C26:1.Abs.conc	0.0684344	0.033639
3	C26:1	WN129	b1	Fat	RIL	Abs.conc		C26:1.Abs.conc	0.0330412	0.0297098
3	C27:0	CB4856	b1	Fat	PL_CB4856	Abs.conc	0.202661	C27:0.Abs.conc	0.3635	0.0854739	FALSE
3	C27:0	N2	b1	Fat	PL_N2	Abs.conc	0.190346	C27:0.Abs.conc	0.267071	0.128525	FALSE
3	C27:0	WN009	b1	Fat	RIL	Abs.conc	0.163634	C27:0.Abs.conc	0.388716	0.0815142	FALSE
3	C27:0	WN013	b1	Fat	RIL	Abs.conc	0.130457	C27:0.Abs.conc	0.266499	0.0894212	FALSE
3	C27:0	WN020	b1	Fat	RIL	Abs.conc	0.13379	C27:0.Abs.conc	0.312717	0.0929332	FALSE
3	C27:0	WN021	b1	Fat	RIL	Abs.conc	0.123996	C27:0.Abs.conc	0.374146	0.0475483	FALSE
3	C27:0	WN031	b1	Fat	RIL	Abs.conc	0.19759	C27:0.Abs.conc			FALSE
3	C27:0	WN038	b1	Fat	RIL	Abs.conc	0.138847	C27:0.Abs.conc	0.388474	0.0914564	FALSE
3	C27:0	WN046	b1	Fat	RIL	Abs.conc	0.0987464	C27:0.Abs.conc	0.312607	0.0641262	FALSE
3	C27:0	WN049	b1	Fat	RIL	Abs.conc	0.157786	C27:0.Abs.conc	0.325135	0.0597889	FALSE
3	C27:0	WN054	b1	Fat	RIL	Abs.conc	0.162189	C27:0.Abs.conc	0.236493	0.147056	FALSE
3	C27:0	WN055	b1	Fat	RIL	Abs.conc	0.138003	C27:0.Abs.conc			FALSE
3	C27:0	WN057	b1	Fat	RIL	Abs.conc	0.171335	C27:0.Abs.conc	0.245366	0.148249	FALSE
3	C27:0	WN058	b1	Fat	RIL	Abs.conc	0.146017	C27:0.Abs.conc	0.285019	0.0217614	FALSE
3	C27:0	WN071	b1	Fat	RIL	Abs.conc	0.180322	C27:0.Abs.conc	0.29908	0.136925	FALSE
3	C27:0	WN075	b1	Fat	RIL	Abs.conc	0.173584	C27:0.Abs.conc	0.236682	0.0894641	FALSE
3	C27:0	WN076	b1	Fat	RIL	Abs.conc	0.130045	C27:0.Abs.conc	0.369664	0.0158172	FALSE
3	C27:0	WN098	b1	Fat	RIL	Abs.conc	0.171562	C27:0.Abs.conc	0.208422	0.130392	FALSE
3	C27:0	WN105	b1	Fat	RIL	Abs.conc	0.177052	C27:0.Abs.conc	0.318347	0.14844	FALSE
3	C27:0	WN106	b1	Fat	RIL	Abs.conc	0.0869173	C27:0.Abs.conc	0.270267	0.0261418	FALSE
3	C27:0	WN107	b1	Fat	RIL	Abs.conc	0.136201	C27:0.Abs.conc	0.368368	0.0562497	FALSE
3	C27:0	WN109	b1	Fat	RIL	Abs.conc	0.102506	C27:0.Abs.conc	0.417391	0.0551665	FALSE
3	C27:0	WN110	b1	Fat	RIL	Abs.conc	0.122716	C27:0.Abs.conc	0.306094	0.0664966	FALSE
3	C27:0	WN112	b1	Fat	RIL	Abs.conc	0.122698	C27:0.Abs.conc	0.323073	0.0490155	FALSE
3	C27:0	WN116	b1	Fat	RIL	Abs.conc	0.179982	C27:0.Abs.conc	0.293425	0.0743465	FALSE
3	C27:0	WN124	b1	Fat	RIL	Abs.conc	0.182692	C27:0.Abs.conc	0.291822	0.116965	FALSE
3	C27:0	WN128	b1	Fat	RIL	Abs.conc	0.164385	C27:0.Abs.conc	0.257622	0.135869	FALSE
3	C27:0	WN129	b1	Fat	RIL	Abs.conc	0.159297	C27:0.Abs.conc	0.282818	0.11345	FALSE
3	C27:1	CB4856	b1	Fat	PL_CB4856	Abs.conc		C27:1.Abs.conc	#NUM!	#NUM!	FALSE
3	C27:1	N2	b1	Fat	PL_N2	Abs.conc		C27:1.Abs.conc	#NUM!	#NUM!	FALSE
3	C27:1	WN009	b1	Fat	RIL	Abs.conc		C27:1.Abs.conc	#NUM!	#NUM!	FALSE
3	C27:1	WN013	b1	Fat	RIL	Abs.conc		C27:1.Abs.conc			FALSE
3	C27:1	WN020	b1	Fat	RIL	Abs.conc		C27:1.Abs.conc	#NUM!	#NUM!	FALSE
3	C27:1	WN021	b1	Fat	RIL	Abs.conc		C27:1.Abs.conc	#NUM!	#NUM!	FALSE
3	C27:1	WN031	b1	Fat	RIL	Abs.conc		C27:1.Abs.conc	#NUM!	#NUM!	FALSE
3	C27:1	WN038	b1	Fat	RIL	Abs.conc		C27:1.Abs.conc	#NUM!	#NUM!	FALSE
3	C27:1	WN046	b1	Fat	RIL	Abs.conc		C27:1.Abs.conc	#NUM!	#NUM!	FALSE
3	C27:1	WN049	b1	Fat	RIL	Abs.conc		C27:1.Abs.conc	#NUM!	#NUM!	FALSE
3	C27:1	WN054	b1	Fat	RIL	Abs.conc		C27:1.Abs.conc	#NUM!	#NUM!	FALSE
3	C27:1	WN055	b1	Fat	RIL	Abs.conc		C27:1.Abs.conc	#NUM!	#NUM!	FALSE
3	C27:1	WN057	b1	Fat	RIL	Abs.conc		C27:1.Abs.conc	#NUM!	#NUM!	FALSE
3	C27:1	WN058	b1	Fat	RIL	Abs.conc		C27:1.Abs.conc			FALSE
3	C27:1	WN071	b1	Fat	RIL	Abs.conc		C27:1.Abs.conc	#NUM!	#NUM!	FALSE
3	C27:1	WN075	b1	Fat	RIL	Abs.conc		C27:1.Abs.conc	#NUM!	#NUM!	FALSE
3	C27:1	WN076	b1	Fat	RIL	Abs.conc		C27:1.Abs.conc	#NUM!	#NUM!	FALSE
3	C27:1	WN098	b1	Fat	RIL	Abs.conc		C27:1.Abs.conc	#NUM!	#NUM!	FALSE
3	C27:1	WN105	b1	Fat	RIL	Abs.conc		C27:1.Abs.conc			FALSE
3	C27:1	WN106	b1	Fat	RIL	Abs.conc		C27:1.Abs.conc			FALSE
3	C27:1	WN107	b1	Fat	RIL	Abs.conc		C27:1.Abs.conc	#NUM!	#NUM!	FALSE
3	C27:1	WN109	b1	Fat	RIL	Abs.conc		C27:1.Abs.conc	#NUM!	#NUM!	FALSE
3	C27:1	WN110	b1	Fat	RIL	Abs.conc		C27:1.Abs.conc	#NUM!	#NUM!	FALSE
3	C27:1	WN112	b1	Fat	RIL	Abs.conc		C27:1.Abs.conc			FALSE
3	C27:1	WN116	b1	Fat	RIL	Abs.conc		C27:1.Abs.conc	#NUM!	#NUM!	FALSE
3	C27:1	WN124	b1	Fat	RIL	Abs.conc		C27:1.Abs.conc	#NUM!	#NUM!	FALSE
3	C27:1	WN128	b1	Fat	RIL	Abs.conc		C27:1.Abs.conc	#NUM!	#NUM!	FALSE
3	C27:1	WN129	b1	Fat	RIL	Abs.conc		C27:1.Abs.conc	#NUM!	#NUM!	FALSE
3	C28:0	CB4856	b1	Fat	PL_CB4856	Abs.conc		C28:0.Abs.conc	#NUM!	#NUM!	FALSE
3	C28:0	N2	b1	Fat	PL_N2	Abs.conc		C28:0.Abs.conc	#NUM!	#NUM!	FALSE
3	C28:0	WN009	b1	Fat	RIL	Abs.conc		C28:0.Abs.conc	#NUM!	#NUM!	FALSE
3	C28:0	WN013	b1	Fat	RIL	Abs.conc		C28:0.Abs.conc	#NUM!	#NUM!	FALSE
3	C28:0	WN020	b1	Fat	RIL	Abs.conc		C28:0.Abs.conc	#NUM!	#NUM!	FALSE
3	C28:0	WN021	b1	Fat	RIL	Abs.conc		C28:0.Abs.conc	#NUM!	#NUM!	FALSE
3	C28:0	WN031	b1	Fat	RIL	Abs.conc		C28:0.Abs.conc	#NUM!	#NUM!	FALSE
3	C28:0	WN038	b1	Fat	RIL	Abs.conc		C28:0.Abs.conc	#NUM!	#NUM!	FALSE
3	C28:0	WN046	b1	Fat	RIL	Abs.conc		C28:0.Abs.conc	#NUM!	#NUM!	FALSE
3	C28:0	WN049	b1	Fat	RIL	Abs.conc		C28:0.Abs.conc	#NUM!	#NUM!	FALSE
3	C28:0	WN054	b1	Fat	RIL	Abs.conc		C28:0.Abs.conc	#NUM!	#NUM!	FALSE
3	C28:0	WN055	b1	Fat	RIL	Abs.conc		C28:0.Abs.conc	#NUM!	#NUM!	FALSE
3	C28:0	WN057	b1	Fat	RIL	Abs.conc		C28:0.Abs.conc	#NUM!	#NUM!	FALSE
3	C28:0	WN058	b1	Fat	RIL	Abs.conc		C28:0.Abs.conc	#NUM!	#NUM!	FALSE
3	C28:0	WN071	b1	Fat	RIL	Abs.conc		C28:0.Abs.conc	#NUM!	#NUM!	FALSE
3	C28:0	WN075	b1	Fat	RIL	Abs.conc		C28:0.Abs.conc	#NUM!	#NUM!	FALSE
3	C28:0	WN076	b1	Fat	RIL	Abs.conc		C28:0.Abs.conc	#NUM!	#NUM!	FALSE
3	C28:0	WN098	b1	Fat	RIL	Abs.conc		C28:0.Abs.conc	#NUM!	#NUM!	FALSE
3	C28:0	WN105	b1	Fat	RIL	Abs.conc		C28:0.Abs.conc	#NUM!	#NUM!	FALSE
3	C28:0	WN106	b1	Fat	RIL	Abs.conc		C28:0.Abs.conc	#NUM!	#NUM!	FALSE
3	C28:0	WN107	b1	Fat	RIL	Abs.conc		C28:0.Abs.conc	#NUM!	#NUM!	FALSE
3	C28:0	WN109	b1	Fat	RIL	Abs.conc		C28:0.Abs.conc	#NUM!	#NUM!	FALSE
3	C28:0	WN110	b1	Fat	RIL	Abs.conc		C28:0.Abs.conc	#NUM!	#NUM!	FALSE
3	C28:0	WN112	b1	Fat	RIL	Abs.conc		C28:0.Abs.conc	#NUM!	#NUM!	FALSE
3	C28:0	WN116	b1	Fat	RIL	Abs.conc		C28:0.Abs.conc	#NUM!	#NUM!	FALSE
3	C28:0	WN124	b1	Fat	RIL	Abs.conc		C28:0.Abs.conc	#NUM!	#NUM!	FALSE
3	C28:0	WN128	b1	Fat	RIL	Abs.conc		C28:0.Abs.conc	#NUM!	#NUM!	FALSE
3	C28:0	WN129	b1	Fat	RIL	Abs.conc		C28:0.Abs.conc	#NUM!	#NUM!	FALSE
3	C28:1	CB4856	b1	Fat	PL_CB4856	Abs.conc		C28:1.Abs.conc	#NUM!	#NUM!	FALSE
3	C28:1	N2	b1	Fat	PL_N2	Abs.conc		C28:1.Abs.conc	#NUM!	#NUM!	FALSE
3	C28:1	WN009	b1	Fat	RIL	Abs.conc		C28:1.Abs.conc	#NUM!	#NUM!	FALSE
3	C28:1	WN013	b1	Fat	RIL	Abs.conc		C28:1.Abs.conc	#NUM!	#NUM!	FALSE
3	C28:1	WN020	b1	Fat	RIL	Abs.conc		C28:1.Abs.conc	#NUM!	#NUM!	FALSE
3	C28:1	WN021	b1	Fat	RIL	Abs.conc		C28:1.Abs.conc	#NUM!	#NUM!	FALSE
3	C28:1	WN031	b1	Fat	RIL	Abs.conc		C28:1.Abs.conc	#NUM!	#NUM!	FALSE
3	C28:1	WN038	b1	Fat	RIL	Abs.conc		C28:1.Abs.conc	#NUM!	#NUM!	FALSE
3	C28:1	WN046	b1	Fat	RIL	Abs.conc		C28:1.Abs.conc	#NUM!	#NUM!	FALSE
3	C28:1	WN049	b1	Fat	RIL	Abs.conc		C28:1.Abs.conc	#NUM!	#NUM!	FALSE
3	C28:1	WN054	b1	Fat	RIL	Abs.conc		C28:1.Abs.conc	#NUM!	#NUM!	FALSE
3	C28:1	WN055	b1	Fat	RIL	Abs.conc		C28:1.Abs.conc	#NUM!	#NUM!	FALSE
3	C28:1	WN057	b1	Fat	RIL	Abs.conc		C28:1.Abs.conc	#NUM!	#NUM!	FALSE
3	C28:1	WN058	b1	Fat	RIL	Abs.conc		C28:1.Abs.conc			FALSE
3	C28:1	WN071	b1	Fat	RIL	Abs.conc		C28:1.Abs.conc	#NUM!	#NUM!	FALSE
3	C28:1	WN075	b1	Fat	RIL	Abs.conc		C28:1.Abs.conc	#NUM!	#NUM!	FALSE
3	C28:1	WN076	b1	Fat	RIL	Abs.conc		C28:1.Abs.conc	#NUM!	#NUM!	FALSE
3	C28:1	WN098	b1	Fat	RIL	Abs.conc		C28:1.Abs.conc	#NUM!	#NUM!	FALSE
3	C28:1	WN105	b1	Fat	RIL	Abs.conc		C28:1.Abs.conc	#NUM!	#NUM!	FALSE
3	C28:1	WN106	b1	Fat	RIL	Abs.conc		C28:1.Abs.conc	#NUM!	#NUM!	FALSE
3	C28:1	WN107	b1	Fat	RIL	Abs.conc		C28:1.Abs.conc	#NUM!	#NUM!	FALSE
3	C28:1	WN109	b1	Fat	RIL	Abs.conc		C28:1.Abs.conc	#NUM!	#NUM!	FALSE
3	C28:1	WN110	b1	Fat	RIL	Abs.conc		C28:1.Abs.conc	#NUM!	#NUM!	FALSE
3	C28:1	WN112	b1	Fat	RIL	Abs.conc		C28:1.Abs.conc	#NUM!	#NUM!	FALSE
3	C28:1	WN116	b1	Fat	RIL	Abs.conc		C28:1.Abs.conc	#NUM!	#NUM!	FALSE
3	C28:1	WN124	b1	Fat	RIL	Abs.conc		C28:1.Abs.conc	#NUM!	#NUM!	FALSE
3	C28:1	WN128	b1	Fat	RIL	Abs.conc		C28:1.Abs.conc	#NUM!	#NUM!	FALSE
3	C28:1	WN129	b1	Fat	RIL	Abs.conc		C28:1.Abs.conc	#NUM!	#NUM!	FALSE
3	C29:0	CB4856	b1	Fat	PL_CB4856	Abs.conc		C29:0.Abs.conc			FALSE
3	C29:0	N2	b1	Fat	PL_N2	Abs.conc		C29:0.Abs.conc			FALSE
3	C29:0	WN009	b1	Fat	RIL	Abs.conc		C29:0.Abs.conc	0.472516	-0.150316
3	C29:0	WN013	b1	Fat	RIL	Abs.conc		C29:0.Abs.conc	#NUM!	#NUM!	FALSE
3	C29:0	WN020	b1	Fat	RIL	Abs.conc		C29:0.Abs.conc	#NUM!	#NUM!	FALSE
3	C29:0	WN021	b1	Fat	RIL	Abs.conc		C29:0.Abs.conc	0.0612577	0.0260894
3	C29:0	WN031	b1	Fat	RIL	Abs.conc		C29:0.Abs.conc	#NUM!	#NUM!	FALSE
3	C29:0	WN038	b1	Fat	RIL	Abs.conc		C29:0.Abs.conc	#NUM!	#NUM!	FALSE
3	C29:0	WN046	b1	Fat	RIL	Abs.conc		C29:0.Abs.conc	#NUM!	#NUM!	FALSE
3	C29:0	WN049	b1	Fat	RIL	Abs.conc		C29:0.Abs.conc	#NUM!	#NUM!	FALSE
3	C29:0	WN054	b1	Fat	RIL	Abs.conc		C29:0.Abs.conc	#NUM!	#NUM!	FALSE
3	C29:0	WN055	b1	Fat	RIL	Abs.conc		C29:0.Abs.conc	#NUM!	#NUM!	FALSE
3	C29:0	WN057	b1	Fat	RIL	Abs.conc		C29:0.Abs.conc	#NUM!	#NUM!	FALSE
3	C29:0	WN058	b1	Fat	RIL	Abs.conc		C29:0.Abs.conc	#NUM!	#NUM!	FALSE
3	C29:0	WN071	b1	Fat	RIL	Abs.conc		C29:0.Abs.conc			FALSE
3	C29:0	WN075	b1	Fat	RIL	Abs.conc		C29:0.Abs.conc	#NUM!	#NUM!	FALSE
3	C29:0	WN076	b1	Fat	RIL	Abs.conc		C29:0.Abs.conc	#NUM!	#NUM!	FALSE
3	C29:0	WN098	b1	Fat	RIL	Abs.conc		C29:0.Abs.conc	#NUM!	#NUM!	FALSE
3	C29:0	WN105	b1	Fat	RIL	Abs.conc		C29:0.Abs.conc			FALSE
3	C29:0	WN106	b1	Fat	RIL	Abs.conc		C29:0.Abs.conc			FALSE
3	C29:0	WN107	b1	Fat	RIL	Abs.conc		C29:0.Abs.conc	#NUM!	#NUM!	FALSE
3	C29:0	WN109	b1	Fat	RIL	Abs.conc		C29:0.Abs.conc	#NUM!	#NUM!	FALSE
3	C29:0	WN110	b1	Fat	RIL	Abs.conc		C29:0.Abs.conc	#NUM!	#NUM!	FALSE
3	C29:0	WN112	b1	Fat	RIL	Abs.conc		C29:0.Abs.conc	#NUM!	#NUM!	FALSE
3	C29:0	WN116	b1	Fat	RIL	Abs.conc		C29:0.Abs.conc	#NUM!	#NUM!	FALSE
3	C29:0	WN124	b1	Fat	RIL	Abs.conc		C29:0.Abs.conc	#NUM!	#NUM!	FALSE
3	C29:0	WN128	b1	Fat	RIL	Abs.conc		C29:0.Abs.conc	#NUM!	#NUM!	FALSE
3	C29:0	WN129	b1	Fat	RIL	Abs.conc		C29:0.Abs.conc	#NUM!	#NUM!	FALSE
3	C29:1	CB4856	b1	Fat	PL_CB4856	Abs.conc		C29:1.Abs.conc	#NUM!	#NUM!	FALSE
3	C29:1	N2	b1	Fat	PL_N2	Abs.conc		C29:1.Abs.conc			FALSE
3	C29:1	WN009	b1	Fat	RIL	Abs.conc		C29:1.Abs.conc	#NUM!	#NUM!	FALSE
3	C29:1	WN013	b1	Fat	RIL	Abs.conc		C29:1.Abs.conc	#NUM!	#NUM!	FALSE
3	C29:1	WN020	b1	Fat	RIL	Abs.conc		C29:1.Abs.conc	#NUM!	#NUM!	FALSE
3	C29:1	WN021	b1	Fat	RIL	Abs.conc		C29:1.Abs.conc	#NUM!	#NUM!	FALSE
3	C29:1	WN031	b1	Fat	RIL	Abs.conc		C29:1.Abs.conc	#NUM!	#NUM!	FALSE
3	C29:1	WN038	b1	Fat	RIL	Abs.conc		C29:1.Abs.conc	#NUM!	#NUM!	FALSE
3	C29:1	WN046	b1	Fat	RIL	Abs.conc		C29:1.Abs.conc	#NUM!	#NUM!	FALSE
3	C29:1	WN049	b1	Fat	RIL	Abs.conc		C29:1.Abs.conc	#NUM!	#NUM!	FALSE
3	C29:1	WN054	b1	Fat	RIL	Abs.conc		C29:1.Abs.conc	#NUM!	#NUM!	FALSE
3	C29:1	WN055	b1	Fat	RIL	Abs.conc		C29:1.Abs.conc	#NUM!	#NUM!	FALSE
3	C29:1	WN057	b1	Fat	RIL	Abs.conc		C29:1.Abs.conc	#NUM!	#NUM!	FALSE
3	C29:1	WN058	b1	Fat	RIL	Abs.conc		C29:1.Abs.conc			FALSE
3	C29:1	WN071	b1	Fat	RIL	Abs.conc		C29:1.Abs.conc	#NUM!	#NUM!	FALSE
3	C29:1	WN075	b1	Fat	RIL	Abs.conc		C29:1.Abs.conc	#NUM!	#NUM!	FALSE
3	C29:1	WN076	b1	Fat	RIL	Abs.conc		C29:1.Abs.conc	#NUM!	#NUM!	FALSE
3	C29:1	WN098	b1	Fat	RIL	Abs.conc		C29:1.Abs.conc	#NUM!	#NUM!	FALSE
3	C29:1	WN105	b1	Fat	RIL	Abs.conc		C29:1.Abs.conc	#NUM!	#NUM!	FALSE
3	C29:1	WN106	b1	Fat	RIL	Abs.conc		C29:1.Abs.conc	#NUM!	#NUM!	FALSE
3	C29:1	WN107	b1	Fat	RIL	Abs.conc		C29:1.Abs.conc	#NUM!	#NUM!	FALSE
3	C29:1	WN109	b1	Fat	RIL	Abs.conc		C29:1.Abs.conc	#NUM!	#NUM!	FALSE
3	C29:1	WN110	b1	Fat	RIL	Abs.conc		C29:1.Abs.conc	#NUM!	#NUM!	FALSE
3	C29:1	WN112	b1	Fat	RIL	Abs.conc		C29:1.Abs.conc	#NUM!	#NUM!	FALSE
3	C29:1	WN116	b1	Fat	RIL	Abs.conc		C29:1.Abs.conc	#NUM!	#NUM!	FALSE
3	C29:1	WN124	b1	Fat	RIL	Abs.conc		C29:1.Abs.conc	#NUM!	#NUM!	FALSE
3	C29:1	WN128	b1	Fat	RIL	Abs.conc		C29:1.Abs.conc	#NUM!	#NUM!	FALSE
3	C29:1	WN129	b1	Fat	RIL	Abs.conc		C29:1.Abs.conc	#NUM!	#NUM!	FALSE
3	C30:0	CB4856	b1	Fat	PL_CB4856	Abs.conc		C30:0.Abs.conc	#NUM!	#NUM!	FALSE
3	C30:0	N2	b1	Fat	PL_N2	Abs.conc		C30:0.Abs.conc	#NUM!	#NUM!	FALSE
3	C30:0	WN009	b1	Fat	RIL	Abs.conc		C30:0.Abs.conc			FALSE
3	C30:0	WN013	b1	Fat	RIL	Abs.conc	0.0705604	C30:0.Abs.conc			FALSE
3	C30:0	WN020	b1	Fat	RIL	Abs.conc		C30:0.Abs.conc	#NUM!	#NUM!	FALSE
3	C30:0	WN021	b1	Fat	RIL	Abs.conc		C30:0.Abs.conc	#NUM!	#NUM!	FALSE
3	C30:0	WN031	b1	Fat	RIL	Abs.conc		C30:0.Abs.conc	#NUM!	#NUM!	FALSE
3	C30:0	WN038	b1	Fat	RIL	Abs.conc		C30:0.Abs.conc	#NUM!	#NUM!	FALSE
3	C30:0	WN046	b1	Fat	RIL	Abs.conc		C30:0.Abs.conc	#NUM!	#NUM!	FALSE
3	C30:0	WN049	b1	Fat	RIL	Abs.conc		C30:0.Abs.conc	#NUM!	#NUM!	FALSE
3	C30:0	WN054	b1	Fat	RIL	Abs.conc	0.0342641	C30:0.Abs.conc			FALSE
3	C30:0	WN055	b1	Fat	RIL	Abs.conc		C30:0.Abs.conc	#NUM!	#NUM!	FALSE
3	C30:0	WN057	b1	Fat	RIL	Abs.conc		C30:0.Abs.conc	#NUM!	#NUM!	FALSE
3	C30:0	WN058	b1	Fat	RIL	Abs.conc		C30:0.Abs.conc	#NUM!	#NUM!	FALSE
3	C30:0	WN071	b1	Fat	RIL	Abs.conc		C30:0.Abs.conc	#NUM!	#NUM!	FALSE
3	C30:0	WN075	b1	Fat	RIL	Abs.conc		C30:0.Abs.conc	#NUM!	#NUM!	FALSE
3	C30:0	WN076	b1	Fat	RIL	Abs.conc		C30:0.Abs.conc	#NUM!	#NUM!	FALSE
3	C30:0	WN098	b1	Fat	RIL	Abs.conc		C30:0.Abs.conc	#NUM!	#NUM!	FALSE
3	C30:0	WN105	b1	Fat	RIL	Abs.conc		C30:0.Abs.conc	#NUM!	#NUM!	FALSE
3	C30:0	WN106	b1	Fat	RIL	Abs.conc		C30:0.Abs.conc	#NUM!	#NUM!	FALSE
3	C30:0	WN107	b1	Fat	RIL	Abs.conc		C30:0.Abs.conc	#NUM!	#NUM!	FALSE
3	C30:0	WN109	b1	Fat	RIL	Abs.conc		C30:0.Abs.conc	#NUM!	#NUM!	FALSE
3	C30:0	WN110	b1	Fat	RIL	Abs.conc		C30:0.Abs.conc	#NUM!	#NUM!	FALSE
3	C30:0	WN112	b1	Fat	RIL	Abs.conc		C30:0.Abs.conc	#NUM!	#NUM!	FALSE
3	C30:0	WN116	b1	Fat	RIL	Abs.conc		C30:0.Abs.conc	#NUM!	#NUM!	FALSE
3	C30:0	WN124	b1	Fat	RIL	Abs.conc		C30:0.Abs.conc	#NUM!	#NUM!	FALSE
3	C30:0	WN128	b1	Fat	RIL	Abs.conc		C30:0.Abs.conc	#NUM!	#NUM!	FALSE
3	C30:0	WN129	b1	Fat	RIL	Abs.conc		C30:0.Abs.conc	#NUM!	#NUM!	FALSE
4	C14:0	CB4856	b1	Fat	PL_CB4856	Abs.conc	12.3549	C14:0.Abs.conc	15.2533	5.69295	FALSE
4	C14:0	N2	b1	Fat	PL_N2	Abs.conc	6.31897	C14:0.Abs.conc	13.1187	5.42306	FALSE
4	C14:0	WN012	b1	Fat	RIL	Abs.conc	7.36353	C14:0.Abs.conc			FALSE
4	C14:0	WN014	b1	Fat	RIL	Abs.conc	5.7958	C14:0.Abs.conc	15.2394	1.28559	FALSE
4	C14:0	WN015	b1	Fat	RIL	Abs.conc	8.36178	C14:0.Abs.conc			FALSE
4	C14:0	WN017	b1	Fat	RIL	Abs.conc	8.03504	C14:0.Abs.conc			FALSE
4	C14:0	WN018	b1	Fat	RIL	Abs.conc	7.96737	C14:0.Abs.conc	12.9649	5.58058	FALSE
4	C14:0	WN022	b1	Fat	RIL	Abs.conc	7.89692	C14:0.Abs.conc			FALSE
4	C14:0	WN027	b1	Fat	RIL	Abs.conc	12.9019	C14:0.Abs.conc			FALSE
4	C14:0	WN028	b1	Fat	RIL	Abs.conc	9.30368	C14:0.Abs.conc			FALSE
4	C14:0	WN029	b1	Fat	RIL	Abs.conc	4.98925	C14:0.Abs.conc			FALSE
4	C14:0	WN032	b1	Fat	RIL	Abs.conc	7.4309	C14:0.Abs.conc			FALSE
4	C14:0	WN034	b1	Fat	RIL	Abs.conc	6.51382	C14:0.Abs.conc	10.654	5.38332	FALSE
4	C14:0	WN035	b1	Fat	RIL	Abs.conc	5.69523	C14:0.Abs.conc	15.071	1.21742	FALSE
4	C14:0	WN036	b1	Fat	RIL	Abs.conc	7.92093	C14:0.Abs.conc	27.3177	1.78587	FALSE
4	C14:0	WN039	b1	Fat	RIL	Abs.conc	7.83376	C14:0.Abs.conc			FALSE
4	C14:0	WN041	b1	Fat	RIL	Abs.conc	7.6813	C14:0.Abs.conc	20.0706	3.75629	FALSE
4	C14:0	WN042	b1	Fat	RIL	Abs.conc	9.51478	C14:0.Abs.conc			FALSE
4	C14:0	WN043	b1	Fat	RIL	Abs.conc	12.7519	C14:0.Abs.conc	13.5119	11.1605	FALSE
4	C14:0	WN044	b1	Fat	RIL	Abs.conc	8.8794	C14:0.Abs.conc			FALSE
4	C14:0	WN047	b1	Fat	RIL	Abs.conc	5.20199	C14:0.Abs.conc			FALSE
4	C14:0	WN048	b1	Fat	RIL	Abs.conc	7.12037	C14:0.Abs.conc	17.3251	3.56986	FALSE
4	C14:0	WN058	b1	Fat	RIL	Abs.conc	14.4776	C14:0.Abs.conc	16.2508	9.02216	FALSE
4	C14:0	WN072	b1	Fat	RIL	Abs.conc	5.43183	C14:0.Abs.conc	16.955	2.5811	FALSE
4	C14:0	WN073	b1	Fat	RIL	Abs.conc	8.76626	C14:0.Abs.conc			FALSE
4	C14:0	WN083	b1	Fat	RIL	Abs.conc	7.49616	C14:0.Abs.conc			FALSE
4	C14:0	WN087	b1	Fat	RIL	Abs.conc	6.94495	C14:0.Abs.conc			FALSE
4	C14:0	WN088	b1	Fat	RIL	Abs.conc	10.4769	C14:0.Abs.conc			FALSE
4	C14:0	WN091	b1	Fat	RIL	Abs.conc	9.4652	C14:0.Abs.conc			FALSE
4	C14:0	WN092	b1	Fat	RIL	Abs.conc	9.10581	C14:0.Abs.conc			FALSE
4	C14:0	WN094	b1	Fat	RIL	Abs.conc	20.5848	C14:0.Abs.conc	26.8039	7.56299	FALSE
4	C14:0	WN113	b1	Fat	RIL	Abs.conc	6.13154	C14:0.Abs.conc	15.4066	2.3617	FALSE
4	C14:0	WN125	b1	Fat	RIL	Abs.conc	10.3889	C14:0.Abs.conc	17.5307	6.97808	FALSE
4	C14:0	WN126	b1	Fat	RIL	Abs.conc	6.6893	C14:0.Abs.conc	11.6992	4.29662	FALSE
4	C14:0	WN134	b1	Fat	RIL	Abs.conc	3.54129	C14:0.Abs.conc	17.597	1.48313	FALSE
4	C14:0	WN135	b1	Fat	RIL	Abs.conc	6.04765	C14:0.Abs.conc	17.3813	3.77056	FALSE
4	C14:0	WN140	b1	Fat	RIL	Abs.conc	7.71111	C14:0.Abs.conc	16.1341	3.88192	FALSE
4	C14:0	WN146	b1	Fat	RIL	Abs.conc	10.14	C14:0.Abs.conc	22.0273	7.91	FALSE
4	C14:0	WN152	b1	Fat	RIL	Abs.conc	7.08551	C14:0.Abs.conc	8.92985	2.31982	FALSE
4	C14:0	WN153	b1	Fat	RIL	Abs.conc	4.63134	C14:0.Abs.conc	14.8719	-1.43576	FALSE
4	C14:0	WN158	b1	Fat	RIL	Abs.conc	10.3967	C14:0.Abs.conc	20.8949	6.29058	FALSE
4	C14:0	WN159	b1	Fat	RIL	Abs.conc	7.09768	C14:0.Abs.conc	17.8513	3.34462	FALSE
4	C14:0	WN161	b1	Fat	RIL	Abs.conc	7.37223	C14:0.Abs.conc	8.25718	3.04721	FALSE
4	C14:0	WN162	b1	Fat	RIL	Abs.conc	9.59795	C14:0.Abs.conc	13.5905	6.5859	FALSE
4	C14:0	WN171	b1	Fat	RIL	Abs.conc	7.00362	C14:0.Abs.conc	15.787	3.5103	FALSE
4	C14:0	WN174	b1	Fat	RIL	Abs.conc	9.96972	C14:0.Abs.conc	14.3566	3.23624	FALSE
4	C14:0	WN176	b1	Fat	RIL	Abs.conc	12.9752	C14:0.Abs.conc	16.6985	9.29733	FALSE
4	C14:0	WN177	b1	Fat	RIL	Abs.conc	10.4082	C14:0.Abs.conc	16.7048	7.29576	FALSE
4	C14:0	WN185	b1	Fat	RIL	Abs.conc	10.6279	C14:0.Abs.conc	13.9766	5.12803	FALSE
4	C14:0	WN186	b1	Fat	RIL	Abs.conc	16.2677	C14:0.Abs.conc	21.0428	8.76656	FALSE
4	C14:0	WN195	b1	Fat	RIL	Abs.conc	9.10779	C14:0.Abs.conc	15.2164	6.48043	FALSE
4	C14:1	CB4856	b1	Fat	PL_CB4856	Abs.conc	9.16177	C14:1.Abs.conc	10.0353	1.986	FALSE
4	C14:1	N2	b1	Fat	PL_N2	Abs.conc	2.83108	C14:1.Abs.conc	3.52255	1.2089	FALSE
4	C14:1	WN012	b1	Fat	RIL	Abs.conc	5.67504	C14:1.Abs.conc			FALSE
4	C14:1	WN014	b1	Fat	RIL	Abs.conc	2.38049	C14:1.Abs.conc	3.49075	1.85024	FALSE
4	C14:1	WN015	b1	Fat	RIL	Abs.conc	6.21514	C14:1.Abs.conc			FALSE
4	C14:1	WN017	b1	Fat	RIL	Abs.conc	4.29258	C14:1.Abs.conc			FALSE
4	C14:1	WN018	b1	Fat	RIL	Abs.conc	4.20598	C14:1.Abs.conc	4.32497	3.95682	FALSE
4	C14:1	WN022	b1	Fat	RIL	Abs.conc	2.88929	C14:1.Abs.conc			FALSE
4	C14:1	WN027	b1	Fat	RIL	Abs.conc	4.79851	C14:1.Abs.conc			FALSE
4	C14:1	WN028	b1	Fat	RIL	Abs.conc	3.91256	C14:1.Abs.conc			FALSE
4	C14:1	WN029	b1	Fat	RIL	Abs.conc	1.92098	C14:1.Abs.conc			FALSE
4	C14:1	WN032	b1	Fat	RIL	Abs.conc	4.04055	C14:1.Abs.conc			FALSE
4	C14:1	WN034	b1	Fat	RIL	Abs.conc	3.7965	C14:1.Abs.conc	4.84837	3.02763	FALSE
4	C14:1	WN035	b1	Fat	RIL	Abs.conc	1.7935	C14:1.Abs.conc	4.25043	0.620094	FALSE
4	C14:1	WN036	b1	Fat	RIL	Abs.conc	3.29339	C14:1.Abs.conc	7.31408	0.991694	FALSE
4	C14:1	WN039	b1	Fat	RIL	Abs.conc	4.76776	C14:1.Abs.conc			FALSE
4	C14:1	WN041	b1	Fat	RIL	Abs.conc	2.38117	C14:1.Abs.conc	5.90423	1.26566	FALSE
4	C14:1	WN042	b1	Fat	RIL	Abs.conc	5.20666	C14:1.Abs.conc			FALSE
4	C14:1	WN043	b1	Fat	RIL	Abs.conc	8.25524	C14:1.Abs.conc	11.8063	0.81992	FALSE
4	C14:1	WN044	b1	Fat	RIL	Abs.conc	4.63341	C14:1.Abs.conc			FALSE
4	C14:1	WN047	b1	Fat	RIL	Abs.conc	2.32922	C14:1.Abs.conc			FALSE
4	C14:1	WN048	b1	Fat	RIL	Abs.conc	3.6435	C14:1.Abs.conc	4.58228	1.70249	FALSE
4	C14:1	WN058	b1	Fat	RIL	Abs.conc	4.98212	C14:1.Abs.conc	6.00797	2.68629	FALSE
4	C14:1	WN072	b1	Fat	RIL	Abs.conc	2.62046	C14:1.Abs.conc	5.2931	1.39708	FALSE
4	C14:1	WN073	b1	Fat	RIL	Abs.conc	8.13101	C14:1.Abs.conc			FALSE
4	C14:1	WN083	b1	Fat	RIL	Abs.conc	3.41709	C14:1.Abs.conc			FALSE
4	C14:1	WN087	b1	Fat	RIL	Abs.conc	2.55136	C14:1.Abs.conc			FALSE
4	C14:1	WN088	b1	Fat	RIL	Abs.conc	3.9308	C14:1.Abs.conc			FALSE
4	C14:1	WN091	b1	Fat	RIL	Abs.conc	3.68942	C14:1.Abs.conc			FALSE
4	C14:1	WN092	b1	Fat	RIL	Abs.conc	5.19629	C14:1.Abs.conc			FALSE
4	C14:1	WN094	b1	Fat	RIL	Abs.conc	11.3385	C14:1.Abs.conc	15.5586	2.50221	FALSE
4	C14:1	WN113	b1	Fat	RIL	Abs.conc	3.90648	C14:1.Abs.conc	13.4354	-0.380064	FALSE
4	C14:1	WN125	b1	Fat	RIL	Abs.conc	6.61435	C14:1.Abs.conc	8.40372	2.86772	FALSE
4	C14:1	WN126	b1	Fat	RIL	Abs.conc	3.96805	C14:1.Abs.conc	5.89232	3.04903	FALSE
4	C14:1	WN134	b1	Fat	RIL	Abs.conc	2.09329	C14:1.Abs.conc	10.2375	0.85227	FALSE
4	C14:1	WN135	b1	Fat	RIL	Abs.conc	2.88235	C14:1.Abs.conc	10.6422	1.19288	FALSE
4	C14:1	WN140	b1	Fat	RIL	Abs.conc	4.21409	C14:1.Abs.conc	7.33657	1.17425	FALSE
4	C14:1	WN146	b1	Fat	RIL	Abs.conc	6.19892	C14:1.Abs.conc	10.6491	4.60486	FALSE
4	C14:1	WN152	b1	Fat	RIL	Abs.conc	4.16063	C14:1.Abs.conc	4.92404	0.869584	FALSE
4	C14:1	WN153	b1	Fat	RIL	Abs.conc	2.66493	C14:1.Abs.conc	7.20877	0.206264	FALSE
4	C14:1	WN158	b1	Fat	RIL	Abs.conc	5.3315	C14:1.Abs.conc	9.69192	4.62027	FALSE
4	C14:1	WN159	b1	Fat	RIL	Abs.conc	2.74041	C14:1.Abs.conc	7.04677	1.29055	FALSE
4	C14:1	WN161	b1	Fat	RIL	Abs.conc	4.47946	C14:1.Abs.conc	5.14793	2.01539	FALSE
4	C14:1	WN162	b1	Fat	RIL	Abs.conc	5.04809	C14:1.Abs.conc	5.90617	1.08143	FALSE
4	C14:1	WN171	b1	Fat	RIL	Abs.conc	2.83827	C14:1.Abs.conc	5.37698	0.90489	FALSE
4	C14:1	WN174	b1	Fat	RIL	Abs.conc	5.33055	C14:1.Abs.conc	12.6253	-0.00737577	FALSE
4	C14:1	WN176	b1	Fat	RIL	Abs.conc	7.7867	C14:1.Abs.conc	9.46031	4.27758	FALSE
4	C14:1	WN177	b1	Fat	RIL	Abs.conc	4.51447	C14:1.Abs.conc	7.84074	2.37779	FALSE
4	C14:1	WN185	b1	Fat	RIL	Abs.conc	4.04508	C14:1.Abs.conc	6.0657	2.09201	FALSE
4	C14:1	WN186	b1	Fat	RIL	Abs.conc	6.60543	C14:1.Abs.conc	7.38745	3.1884	FALSE
4	C14:1	WN195	b1	Fat	RIL	Abs.conc	3.96662	C14:1.Abs.conc	4.66654	1.57026	FALSE
4	C15:0	CB4856	b1	Fat	PL_CB4856	Abs.conc	64.6355	C15:0.Abs.conc	90.4775	33.3377	FALSE
4	C15:0	N2	b1	Fat	PL_N2	Abs.conc	33.0749	C15:0.Abs.conc	56.4619	27.9306	FALSE
4	C15:0	WN012	b1	Fat	RIL	Abs.conc	48.5305	C15:0.Abs.conc			FALSE
4	C15:0	WN014	b1	Fat	RIL	Abs.conc	28.1443	C15:0.Abs.conc	61.5522	12.189	FALSE
4	C15:0	WN015	b1	Fat	RIL	Abs.conc	47.5558	C15:0.Abs.conc			FALSE
4	C15:0	WN017	b1	Fat	RIL	Abs.conc	48.4239	C15:0.Abs.conc			FALSE
4	C15:0	WN018	b1	Fat	RIL	Abs.conc	51.0141	C15:0.Abs.conc	56.175	40.208	FALSE
4	C15:0	WN022	b1	Fat	RIL	Abs.conc	36.3657	C15:0.Abs.conc			FALSE
4	C15:0	WN027	b1	Fat	RIL	Abs.conc	59.8492	C15:0.Abs.conc			FALSE
4	C15:0	WN028	b1	Fat	RIL	Abs.conc	46.9792	C15:0.Abs.conc			FALSE
4	C15:0	WN029	b1	Fat	RIL	Abs.conc	29.1565	C15:0.Abs.conc			FALSE
4	C15:0	WN032	b1	Fat	RIL	Abs.conc	37.2664	C15:0.Abs.conc			FALSE
4	C15:0	WN034	b1	Fat	RIL	Abs.conc	39.753	C15:0.Abs.conc	63.0164	35.0044	FALSE
4	C15:0	WN035	b1	Fat	RIL	Abs.conc	28.9551	C15:0.Abs.conc	66.8259	10.8683	FALSE
4	C15:0	WN036	b1	Fat	RIL	Abs.conc	36.6998	C15:0.Abs.conc	108.351	16.6943	FALSE
4	C15:0	WN039	b1	Fat	RIL	Abs.conc	53.579	C15:0.Abs.conc			FALSE
4	C15:0	WN041	b1	Fat	RIL	Abs.conc	36.1359	C15:0.Abs.conc	96.3013	18.3606	FALSE
4	C15:0	WN042	b1	Fat	RIL	Abs.conc	45.2001	C15:0.Abs.conc			FALSE
4	C15:0	WN043	b1	Fat	RIL	Abs.conc	66.8158	C15:0.Abs.conc	81.4341	36.2076	FALSE
4	C15:0	WN044	b1	Fat	RIL	Abs.conc	48.4246	C15:0.Abs.conc			FALSE
4	C15:0	WN047	b1	Fat	RIL	Abs.conc	26.7947	C15:0.Abs.conc			FALSE
4	C15:0	WN048	b1	Fat	RIL	Abs.conc	35.7987	C15:0.Abs.conc	85.1988	18.9665	FALSE
4	C15:0	WN058	b1	Fat	RIL	Abs.conc	67.0541	C15:0.Abs.conc	73.6116	41.0045	FALSE
4	C15:0	WN072	b1	Fat	RIL	Abs.conc	34.0152	C15:0.Abs.conc	69.8873	22.7632	FALSE
4	C15:0	WN073	b1	Fat	RIL	Abs.conc	50.8755	C15:0.Abs.conc			FALSE
4	C15:0	WN083	b1	Fat	RIL	Abs.conc	43.6614	C15:0.Abs.conc			FALSE
4	C15:0	WN087	b1	Fat	RIL	Abs.conc	34.686	C15:0.Abs.conc			FALSE
4	C15:0	WN088	b1	Fat	RIL	Abs.conc	44.1884	C15:0.Abs.conc			FALSE
4	C15:0	WN091	b1	Fat	RIL	Abs.conc	55.2501	C15:0.Abs.conc			FALSE
4	C15:0	WN092	b1	Fat	RIL	Abs.conc	48.0072	C15:0.Abs.conc			FALSE
4	C15:0	WN094	b1	Fat	RIL	Abs.conc	96.6026	C15:0.Abs.conc	131.107	24.355	FALSE
4	C15:0	WN113	b1	Fat	RIL	Abs.conc	29.7758	C15:0.Abs.conc	73.795	14.2543	FALSE
4	C15:0	WN125	b1	Fat	RIL	Abs.conc	67.6022	C15:0.Abs.conc	72.5909	57.1564	FALSE
4	C15:0	WN126	b1	Fat	RIL	Abs.conc	52.8788	C15:0.Abs.conc	62.7359	48.1712	FALSE
4	C15:0	WN134	b1	Fat	RIL	Abs.conc	22.8238	C15:0.Abs.conc	100.67	11.5643	FALSE
4	C15:0	WN135	b1	Fat	RIL	Abs.conc	29.1617	C15:0.Abs.conc	73.7446	20.5142	FALSE
4	C15:0	WN140	b1	Fat	RIL	Abs.conc	40.9558	C15:0.Abs.conc	71.8012	21.68	FALSE
4	C15:0	WN146	b1	Fat	RIL	Abs.conc	42.9609	C15:0.Abs.conc	87.468	32.6033	FALSE
4	C15:0	WN152	b1	Fat	RIL	Abs.conc	34.9117	C15:0.Abs.conc	41.3593	17.0007	FALSE
4	C15:0	WN153	b1	Fat	RIL	Abs.conc	32.7738	C15:0.Abs.conc	78.1534	-1.0364	FALSE
4	C15:0	WN158	b1	Fat	RIL	Abs.conc	61.3632	C15:0.Abs.conc	114.378	50.8621	FALSE
4	C15:0	WN159	b1	Fat	RIL	Abs.conc	40.109	C15:0.Abs.conc	108.322	17.6561	FALSE
4	C15:0	WN161	b1	Fat	RIL	Abs.conc	41.1098	C15:0.Abs.conc	47.7242	15.1752	FALSE
4	C15:0	WN162	b1	Fat	RIL	Abs.conc	53.798	C15:0.Abs.conc	64.8969	33.4301	FALSE
4	C15:0	WN171	b1	Fat	RIL	Abs.conc	55.6842	C15:0.Abs.conc	92.4751	31.9642	FALSE
4	C15:0	WN174	b1	Fat	RIL	Abs.conc	48.1855	C15:0.Abs.conc	114.408	13.0545	FALSE
4	C15:0	WN176	b1	Fat	RIL	Abs.conc	81.543	C15:0.Abs.conc	104.957	53.913	FALSE
4	C15:0	WN177	b1	Fat	RIL	Abs.conc	54.3341	C15:0.Abs.conc	84.6359	36.5077	FALSE
4	C15:0	WN185	b1	Fat	RIL	Abs.conc	64.6875	C15:0.Abs.conc	87.5396	40.2477	FALSE
4	C15:0	WN186	b1	Fat	RIL	Abs.conc	95.0777	C15:0.Abs.conc	107.046	60.2258	FALSE
4	C15:0	WN195	b1	Fat	RIL	Abs.conc	42.3436	C15:0.Abs.conc	71.0152	27.4354	FALSE
4	C15:1	CB4856	b1	Fat	PL_CB4856	Abs.conc	2.72236	C15:1.Abs.conc	3.57166	1.45035	FALSE
4	C15:1	N2	b1	Fat	PL_N2	Abs.conc	1.38431	C15:1.Abs.conc	2.14929	1.08863	FALSE
4	C15:1	WN012	b1	Fat	RIL	Abs.conc	1.96193	C15:1.Abs.conc			FALSE
4	C15:1	WN014	b1	Fat	RIL	Abs.conc	1.81634	C15:1.Abs.conc	2.1667	1.08273	FALSE
4	C15:1	WN015	b1	Fat	RIL	Abs.conc	2.84284	C15:1.Abs.conc			FALSE
4	C15:1	WN017	b1	Fat	RIL	Abs.conc	1.79056	C15:1.Abs.conc			FALSE
4	C15:1	WN018	b1	Fat	RIL	Abs.conc	2.17915	C15:1.Abs.conc	2.39137	1.73479	FALSE
4	C15:1	WN022	b1	Fat	RIL	Abs.conc	1.65136	C15:1.Abs.conc			FALSE
4	C15:1	WN027	b1	Fat	RIL	Abs.conc	2.04027	C15:1.Abs.conc			FALSE
4	C15:1	WN028	b1	Fat	RIL	Abs.conc	1.63901	C15:1.Abs.conc			FALSE
4	C15:1	WN029	b1	Fat	RIL	Abs.conc	1.3657	C15:1.Abs.conc			FALSE
4	C15:1	WN032	b1	Fat	RIL	Abs.conc	1.68672	C15:1.Abs.conc			FALSE
4	C15:1	WN034	b1	Fat	RIL	Abs.conc	1.38461	C15:1.Abs.conc	2.29416	1.2533	FALSE
4	C15:1	WN035	b1	Fat	RIL	Abs.conc	1.60057	C15:1.Abs.conc	1.72493	1.34017	FALSE
4	C15:1	WN036	b1	Fat	RIL	Abs.conc	1.81764	C15:1.Abs.conc	3.52837	1.17007	FALSE
4	C15:1	WN039	b1	Fat	RIL	Abs.conc	1.82259	C15:1.Abs.conc			FALSE
4	C15:1	WN041	b1	Fat	RIL	Abs.conc	1.13261	C15:1.Abs.conc	14.7884	-5.39871	FALSE
4	C15:1	WN042	b1	Fat	RIL	Abs.conc	1.87363	C15:1.Abs.conc			FALSE
4	C15:1	WN043	b1	Fat	RIL	Abs.conc	4.7431	C15:1.Abs.conc	6.89916	0.228659	FALSE
4	C15:1	WN044	b1	Fat	RIL	Abs.conc	1.95139	C15:1.Abs.conc			FALSE
4	C15:1	WN047	b1	Fat	RIL	Abs.conc	1.72585	C15:1.Abs.conc			FALSE
4	C15:1	WN048	b1	Fat	RIL	Abs.conc	1.67612	C15:1.Abs.conc	3.04719	1.27506	FALSE
4	C15:1	WN058	b1	Fat	RIL	Abs.conc	2.17193	C15:1.Abs.conc	4.34719	0.934679	FALSE
4	C15:1	WN072	b1	Fat	RIL	Abs.conc	1.42266	C15:1.Abs.conc	2.64809	0.956849	FALSE
4	C15:1	WN073	b1	Fat	RIL	Abs.conc	2.66466	C15:1.Abs.conc			FALSE
4	C15:1	WN083	b1	Fat	RIL	Abs.conc	1.38275	C15:1.Abs.conc			FALSE
4	C15:1	WN087	b1	Fat	RIL	Abs.conc	1.23824	C15:1.Abs.conc			FALSE
4	C15:1	WN088	b1	Fat	RIL	Abs.conc	2.05661	C15:1.Abs.conc			FALSE
4	C15:1	WN091	b1	Fat	RIL	Abs.conc	1.87386	C15:1.Abs.conc			FALSE
4	C15:1	WN092	b1	Fat	RIL	Abs.conc	2.17387	C15:1.Abs.conc			FALSE
4	C15:1	WN094	b1	Fat	RIL	Abs.conc	4.9423	C15:1.Abs.conc	7.05365	0.521483	FALSE
4	C15:1	WN113	b1	Fat	RIL	Abs.conc	1.67272	C15:1.Abs.conc	5.26111	0.174794	FALSE
4	C15:1	WN125	b1	Fat	RIL	Abs.conc	3.54799	C15:1.Abs.conc	4.36168	1.84424	FALSE
4	C15:1	WN126	b1	Fat	RIL	Abs.conc	2.09776	C15:1.Abs.conc	2.51425	1.22567	FALSE
4	C15:1	WN134	b1	Fat	RIL	Abs.conc	1.22431	C15:1.Abs.conc	4.2271	0.74445	FALSE
4	C15:1	WN135	b1	Fat	RIL	Abs.conc	3.42969	C15:1.Abs.conc	3.89091	1.20795	FALSE
4	C15:1	WN140	b1	Fat	RIL	Abs.conc	1.95902	C15:1.Abs.conc	3.1553	0.877626	FALSE
4	C15:1	WN146	b1	Fat	RIL	Abs.conc	2.01304	C15:1.Abs.conc	4.8291	1.38532	FALSE
4	C15:1	WN152	b1	Fat	RIL	Abs.conc	1.52812	C15:1.Abs.conc	1.84192	0.751544	FALSE
4	C15:1	WN153	b1	Fat	RIL	Abs.conc	1.93126	C15:1.Abs.conc	3.04856	0.754685	FALSE
4	C15:1	WN158	b1	Fat	RIL	Abs.conc	2.28655	C15:1.Abs.conc	3.8944	2.03802	FALSE
4	C15:1	WN159	b1	Fat	RIL	Abs.conc	1.22712	C15:1.Abs.conc	4.50151	0.347836	FALSE
4	C15:1	WN161	b1	Fat	RIL	Abs.conc	1.64649	C15:1.Abs.conc	2.21617	1.45223	FALSE
4	C15:1	WN162	b1	Fat	RIL	Abs.conc	2.76487	C15:1.Abs.conc	3.30844	0.630279	FALSE
4	C15:1	WN171	b1	Fat	RIL	Abs.conc	1.80253	C15:1.Abs.conc	3.07967	0.72675	FALSE
4	C15:1	WN174	b1	Fat	RIL	Abs.conc	1.84096	C15:1.Abs.conc	3.09876	0.946516	FALSE
4	C15:1	WN176	b1	Fat	RIL	Abs.conc	3.54572	C15:1.Abs.conc	4.44553	2.07211	FALSE
4	C15:1	WN177	b1	Fat	RIL	Abs.conc	1.74589	C15:1.Abs.conc	2.57443	1.20355	FALSE
4	C15:1	WN185	b1	Fat	RIL	Abs.conc	1.83488	C15:1.Abs.conc	3.22641	1.32256	FALSE
4	C15:1	WN186	b1	Fat	RIL	Abs.conc	3.03412	C15:1.Abs.conc	3.94117	0.971321	FALSE
4	C15:1	WN195	b1	Fat	RIL	Abs.conc	1.83866	C15:1.Abs.conc	2.66789	1.0893	FALSE
4	C16:0	CB4856	b1	Fat	PL_CB4856	Abs.conc	31.6074	C16:0.Abs.conc	40.1131	8.29953	FALSE
4	C16:0	N2	b1	Fat	PL_N2	Abs.conc	17.0661	C16:0.Abs.conc	33.3421	8.30282	FALSE
4	C16:0	WN012	b1	Fat	RIL	Abs.conc	21.1704	C16:0.Abs.conc			FALSE
4	C16:0	WN014	b1	Fat	RIL	Abs.conc	12.6184	C16:0.Abs.conc	26.7115	5.88761	FALSE
4	C16:0	WN015	b1	Fat	RIL	Abs.conc	24.8107	C16:0.Abs.conc			FALSE
4	C16:0	WN017	b1	Fat	RIL	Abs.conc	25.3006	C16:0.Abs.conc			FALSE
4	C16:0	WN018	b1	Fat	RIL	Abs.conc	16.3696	C16:0.Abs.conc	28.6301	10.5141	FALSE
4	C16:0	WN022	b1	Fat	RIL	Abs.conc	21.8743	C16:0.Abs.conc			FALSE
4	C16:0	WN027	b1	Fat	RIL	Abs.conc	33.4889	C16:0.Abs.conc			FALSE
4	C16:0	WN028	b1	Fat	RIL	Abs.conc	23.5857	C16:0.Abs.conc			FALSE
4	C16:0	WN029	b1	Fat	RIL	Abs.conc	14.869	C16:0.Abs.conc			FALSE
4	C16:0	WN032	b1	Fat	RIL	Abs.conc	17.5747	C16:0.Abs.conc			FALSE
4	C16:0	WN034	b1	Fat	RIL	Abs.conc	17.8471	C16:0.Abs.conc	24.2335	16.7296	FALSE
4	C16:0	WN035	b1	Fat	RIL	Abs.conc	24.8161	C16:0.Abs.conc	29.3385	15.3469	FALSE
4	C16:0	WN036	b1	Fat	RIL	Abs.conc	19.8691	C16:0.Abs.conc	62.4966	7.09966	FALSE
4	C16:0	WN039	b1	Fat	RIL	Abs.conc	20.9239	C16:0.Abs.conc			FALSE
4	C16:0	WN041	b1	Fat	RIL	Abs.conc	14.6921	C16:0.Abs.conc	51.8471	6.54904	FALSE
4	C16:0	WN042	b1	Fat	RIL	Abs.conc	22.3437	C16:0.Abs.conc			FALSE
4	C16:0	WN043	b1	Fat	RIL	Abs.conc	38.7613	C16:0.Abs.conc	55.8878	2.90117	FALSE
4	C16:0	WN044	b1	Fat	RIL	Abs.conc	20.2254	C16:0.Abs.conc			FALSE
4	C16:0	WN047	b1	Fat	RIL	Abs.conc	16.8701	C16:0.Abs.conc			FALSE
4	C16:0	WN048	b1	Fat	RIL	Abs.conc	16.1552	C16:0.Abs.conc	41.806	8.93432	FALSE
4	C16:0	WN058	b1	Fat	RIL	Abs.conc	34.0148	C16:0.Abs.conc	36.8967	20.7914	FALSE
4	C16:0	WN072	b1	Fat	RIL	Abs.conc	9.04344	C16:0.Abs.conc	38.2975	3.1953	FALSE
4	C16:0	WN073	b1	Fat	RIL	Abs.conc	26.8724	C16:0.Abs.conc			FALSE
4	C16:0	WN083	b1	Fat	RIL	Abs.conc	19.6028	C16:0.Abs.conc			FALSE
4	C16:0	WN087	b1	Fat	RIL	Abs.conc	16.1589	C16:0.Abs.conc			FALSE
4	C16:0	WN088	b1	Fat	RIL	Abs.conc	29.6424	C16:0.Abs.conc			FALSE
4	C16:0	WN091	b1	Fat	RIL	Abs.conc	26.3395	C16:0.Abs.conc			FALSE
4	C16:0	WN092	b1	Fat	RIL	Abs.conc	26.0707	C16:0.Abs.conc			FALSE
4	C16:0	WN094	b1	Fat	RIL	Abs.conc	54.239	C16:0.Abs.conc	81.2023	-2.21765	FALSE
4	C16:0	WN113	b1	Fat	RIL	Abs.conc	10.5042	C16:0.Abs.conc	41.3619	2.93189	FALSE
4	C16:0	WN125	b1	Fat	RIL	Abs.conc	35.9129	C16:0.Abs.conc	44.7922	17.3209	FALSE
4	C16:0	WN126	b1	Fat	RIL	Abs.conc	14.1413	C16:0.Abs.conc	24.5024	9.1929	FALSE
4	C16:0	WN134	b1	Fat	RIL	Abs.conc	9.00028	C16:0.Abs.conc	40.3009	4.44737	FALSE
4	C16:0	WN135	b1	Fat	RIL	Abs.conc	23.2473	C16:0.Abs.conc	32.238	21.1243	FALSE
4	C16:0	WN140	b1	Fat	RIL	Abs.conc	24.7042	C16:0.Abs.conc	37.5123	15.5568	FALSE
4	C16:0	WN146	b1	Fat	RIL	Abs.conc	25.5986	C16:0.Abs.conc	50.3007	21.4979	FALSE
4	C16:0	WN152	b1	Fat	RIL	Abs.conc	21.998	C16:0.Abs.conc	26.6585	7.76339	FALSE
4	C16:0	WN153	b1	Fat	RIL	Abs.conc	8.20919	C16:0.Abs.conc	34.2868	3.30029	FALSE
4	C16:0	WN158	b1	Fat	RIL	Abs.conc	24.4005	C16:0.Abs.conc	44.6328	15.0034	FALSE
4	C16:0	WN159	b1	Fat	RIL	Abs.conc	17.2413	C16:0.Abs.conc	42.122	9.92494	FALSE
4	C16:0	WN161	b1	Fat	RIL	Abs.conc	19.2373	C16:0.Abs.conc	22.8907	11.7409	FALSE
4	C16:0	WN162	b1	Fat	RIL	Abs.conc	29.3455	C16:0.Abs.conc	35.3999	20.0842	FALSE
4	C16:0	WN171	b1	Fat	RIL	Abs.conc	19.0567	C16:0.Abs.conc	41.7842	11.1012	FALSE
4	C16:0	WN174	b1	Fat	RIL	Abs.conc	28.5613	C16:0.Abs.conc	39.736	14.8279	FALSE
4	C16:0	WN176	b1	Fat	RIL	Abs.conc	35.2613	C16:0.Abs.conc	39.5317	20.7655	FALSE
4	C16:0	WN177	b1	Fat	RIL	Abs.conc	23.7961	C16:0.Abs.conc	39.6692	19.0244	FALSE
4	C16:0	WN185	b1	Fat	RIL	Abs.conc	25.6187	C16:0.Abs.conc	31.0016	14.5438	FALSE
4	C16:0	WN186	b1	Fat	RIL	Abs.conc	42.5332	C16:0.Abs.conc	49.1929	19.9254	FALSE
4	C16:0	WN195	b1	Fat	RIL	Abs.conc	21.2834	C16:0.Abs.conc	37.1921	15.118	FALSE
4	C16:1	CB4856	b1	Fat	PL_CB4856	Abs.conc	31.4866	C16:1.Abs.conc	38.7189	4.81626	FALSE
4	C16:1	N2	b1	Fat	PL_N2	Abs.conc	17.7996	C16:1.Abs.conc	21.8728	10.255	FALSE
4	C16:1	WN012	b1	Fat	RIL	Abs.conc	22.1558	C16:1.Abs.conc			FALSE
4	C16:1	WN014	b1	Fat	RIL	Abs.conc	15.6357	C16:1.Abs.conc	23.4864	11.8863	FALSE
4	C16:1	WN015	b1	Fat	RIL	Abs.conc	22.0838	C16:1.Abs.conc			FALSE
4	C16:1	WN017	b1	Fat	RIL	Abs.conc	22.8784	C16:1.Abs.conc			FALSE
4	C16:1	WN018	b1	Fat	RIL	Abs.conc	18.8237	C16:1.Abs.conc	20.1458	16.0553	FALSE
4	C16:1	WN022	b1	Fat	RIL	Abs.conc	18.2962	C16:1.Abs.conc			FALSE
4	C16:1	WN027	b1	Fat	RIL	Abs.conc	32.9021	C16:1.Abs.conc			FALSE
4	C16:1	WN028	b1	Fat	RIL	Abs.conc	25.7705	C16:1.Abs.conc			FALSE
4	C16:1	WN029	b1	Fat	RIL	Abs.conc	12.9792	C16:1.Abs.conc			FALSE
4	C16:1	WN032	b1	Fat	RIL	Abs.conc	16.1104	C16:1.Abs.conc			FALSE
4	C16:1	WN034	b1	Fat	RIL	Abs.conc	18.4299	C16:1.Abs.conc	19.6008	13.2639	FALSE
4	C16:1	WN035	b1	Fat	RIL	Abs.conc	11.0289	C16:1.Abs.conc	22.9883	5.31718	FALSE
4	C16:1	WN036	b1	Fat	RIL	Abs.conc	18.9804	C16:1.Abs.conc	43.1207	9.19518	FALSE
4	C16:1	WN039	b1	Fat	RIL	Abs.conc	23.2802	C16:1.Abs.conc			FALSE
4	C16:1	WN041	b1	Fat	RIL	Abs.conc	15.2259	C16:1.Abs.conc	35.2048	9.71342	FALSE
4	C16:1	WN042	b1	Fat	RIL	Abs.conc	21.3683	C16:1.Abs.conc			FALSE
4	C16:1	WN043	b1	Fat	RIL	Abs.conc	32.0066	C16:1.Abs.conc	47.5045	-0.443449	FALSE
4	C16:1	WN044	b1	Fat	RIL	Abs.conc	20.8421	C16:1.Abs.conc			FALSE
4	C16:1	WN047	b1	Fat	RIL	Abs.conc	10.4487	C16:1.Abs.conc			FALSE
4	C16:1	WN048	b1	Fat	RIL	Abs.conc	19.2028	C16:1.Abs.conc	30.7667	10.9122	FALSE
4	C16:1	WN058	b1	Fat	RIL	Abs.conc	27.6321	C16:1.Abs.conc	29.2411	13.2644	FALSE
4	C16:1	WN072	b1	Fat	RIL	Abs.conc	12.7052	C16:1.Abs.conc	26.2811	9.61201	FALSE
4	C16:1	WN073	b1	Fat	RIL	Abs.conc	35.5899	C16:1.Abs.conc			FALSE
4	C16:1	WN083	b1	Fat	RIL	Abs.conc	20.2922	C16:1.Abs.conc			FALSE
4	C16:1	WN087	b1	Fat	RIL	Abs.conc	16.9338	C16:1.Abs.conc			FALSE
4	C16:1	WN088	b1	Fat	RIL	Abs.conc	26.3217	C16:1.Abs.conc			FALSE
4	C16:1	WN091	b1	Fat	RIL	Abs.conc	22.676	C16:1.Abs.conc			FALSE
4	C16:1	WN092	b1	Fat	RIL	Abs.conc	22.89	C16:1.Abs.conc			FALSE
4	C16:1	WN094	b1	Fat	RIL	Abs.conc	42.4517	C16:1.Abs.conc	60.2888	5.10369	FALSE
4	C16:1	WN113	b1	Fat	RIL	Abs.conc	13.6656	C16:1.Abs.conc	28.1648	8.87206	FALSE
4	C16:1	WN125	b1	Fat	RIL	Abs.conc	34.0134	C16:1.Abs.conc	47.6886	5.37977	FALSE
4	C16:1	WN126	b1	Fat	RIL	Abs.conc	19.2096	C16:1.Abs.conc	20.0795	18.7942	FALSE
4	C16:1	WN134	b1	Fat	RIL	Abs.conc	9.61379	C16:1.Abs.conc	33.5113	6.14863	FALSE
4	C16:1	WN135	b1	Fat	RIL	Abs.conc	11.2825	C16:1.Abs.conc	42.3927	5.10829	FALSE
4	C16:1	WN140	b1	Fat	RIL	Abs.conc	18.933	C16:1.Abs.conc	25.7663	9.72919	FALSE
4	C16:1	WN146	b1	Fat	RIL	Abs.conc	24.4946	C16:1.Abs.conc	31.9612	21.0761	FALSE
4	C16:1	WN152	b1	Fat	RIL	Abs.conc	17.1361	C16:1.Abs.conc	19.5186	3.69949	FALSE
4	C16:1	WN153	b1	Fat	RIL	Abs.conc	11.4363	C16:1.Abs.conc	26.8688	-2.23012	FALSE
4	C16:1	WN158	b1	Fat	RIL	Abs.conc	22.5452	C16:1.Abs.conc	32.1443	17.4594	FALSE
4	C16:1	WN159	b1	Fat	RIL	Abs.conc	17.0522	C16:1.Abs.conc	42.1892	7.27323	FALSE
4	C16:1	WN161	b1	Fat	RIL	Abs.conc	18.7934	C16:1.Abs.conc	21.8021	2.04665	FALSE
4	C16:1	WN162	b1	Fat	RIL	Abs.conc	26.8046	C16:1.Abs.conc	29.9214	20.8384	FALSE
4	C16:1	WN171	b1	Fat	RIL	Abs.conc	18.7676	C16:1.Abs.conc	44.3041	5.74962	FALSE
4	C16:1	WN174	b1	Fat	RIL	Abs.conc	24.2533	C16:1.Abs.conc	70.3772	0.559996	FALSE
4	C16:1	WN176	b1	Fat	RIL	Abs.conc	32.6717	C16:1.Abs.conc	37.68	14.8105	FALSE
4	C16:1	WN177	b1	Fat	RIL	Abs.conc	22.9993	C16:1.Abs.conc	42.1614	15.393	FALSE
4	C16:1	WN185	b1	Fat	RIL	Abs.conc	28.1465	C16:1.Abs.conc	32.5686	7.86171	FALSE
4	C16:1	WN186	b1	Fat	RIL	Abs.conc	45.6528	C16:1.Abs.conc	60.0366	5.4767	FALSE
4	C16:1	WN195	b1	Fat	RIL	Abs.conc	21.6308	C16:1.Abs.conc	31.4783	9.63175	FALSE
4	C17:0	CB4856	b1	Fat	PL_CB4856	Abs.conc	65.0448	C17:0.Abs.conc	81.2314	32.7645	FALSE
4	C17:0	N2	b1	Fat	PL_N2	Abs.conc	38.5951	C17:0.Abs.conc	52.8396	32.1002	FALSE
4	C17:0	WN012	b1	Fat	RIL	Abs.conc	48.554	C17:0.Abs.conc			FALSE
4	C17:0	WN014	b1	Fat	RIL	Abs.conc	31.2062	C17:0.Abs.conc	39.5986	27.198	FALSE
4	C17:0	WN015	b1	Fat	RIL	Abs.conc	47.7692	C17:0.Abs.conc			FALSE
4	C17:0	WN017	b1	Fat	RIL	Abs.conc	47.608	C17:0.Abs.conc			FALSE
4	C17:0	WN018	b1	Fat	RIL	Abs.conc	55.3716	C17:0.Abs.conc	66.065	32.9814	FALSE
4	C17:0	WN022	b1	Fat	RIL	Abs.conc	38.84	C17:0.Abs.conc			FALSE
4	C17:0	WN027	b1	Fat	RIL	Abs.conc	50.2727	C17:0.Abs.conc			FALSE
4	C17:0	WN028	b1	Fat	RIL	Abs.conc	44.7654	C17:0.Abs.conc			FALSE
4	C17:0	WN029	b1	Fat	RIL	Abs.conc	31.349	C17:0.Abs.conc			FALSE
4	C17:0	WN032	b1	Fat	RIL	Abs.conc	33.9512	C17:0.Abs.conc			FALSE
4	C17:0	WN034	b1	Fat	RIL	Abs.conc	45.4472	C17:0.Abs.conc	89.6488	39.1208	FALSE
4	C17:0	WN035	b1	Fat	RIL	Abs.conc	34.7757	C17:0.Abs.conc	64.5492	20.5561	FALSE
4	C17:0	WN036	b1	Fat	RIL	Abs.conc	41.5238	C17:0.Abs.conc	105.11	22.8044	FALSE
4	C17:0	WN039	b1	Fat	RIL	Abs.conc	51.056	C17:0.Abs.conc			FALSE
4	C17:0	WN041	b1	Fat	RIL	Abs.conc	34.0453	C17:0.Abs.conc	79.6136	20.6553	FALSE
4	C17:0	WN042	b1	Fat	RIL	Abs.conc	45.1177	C17:0.Abs.conc			FALSE
4	C17:0	WN043	b1	Fat	RIL	Abs.conc	76.0703	C17:0.Abs.conc	107.83	9.56959	FALSE
4	C17:0	WN044	b1	Fat	RIL	Abs.conc	39.9648	C17:0.Abs.conc			FALSE
4	C17:0	WN047	b1	Fat	RIL	Abs.conc	33.7781	C17:0.Abs.conc			FALSE
4	C17:0	WN048	b1	Fat	RIL	Abs.conc	41.232	C17:0.Abs.conc	81.0446	24.9199	FALSE
4	C17:0	WN058	b1	Fat	RIL	Abs.conc	57.6227	C17:0.Abs.conc	65.6401	36.6421	FALSE
4	C17:0	WN072	b1	Fat	RIL	Abs.conc	41.2704	C17:0.Abs.conc	64.7614	29.8445	FALSE
4	C17:0	WN073	b1	Fat	RIL	Abs.conc	50.0313	C17:0.Abs.conc			FALSE
4	C17:0	WN083	b1	Fat	RIL	Abs.conc	47.8428	C17:0.Abs.conc			FALSE
4	C17:0	WN087	b1	Fat	RIL	Abs.conc	36.5544	C17:0.Abs.conc			FALSE
4	C17:0	WN088	b1	Fat	RIL	Abs.conc	35.3514	C17:0.Abs.conc			FALSE
4	C17:0	WN091	b1	Fat	RIL	Abs.conc	51.9634	C17:0.Abs.conc			FALSE
4	C17:0	WN092	b1	Fat	RIL	Abs.conc	48.1191	C17:0.Abs.conc			FALSE
4	C17:0	WN094	b1	Fat	RIL	Abs.conc	92.3214	C17:0.Abs.conc	134.207	4.62001	FALSE
4	C17:0	WN113	b1	Fat	RIL	Abs.conc	33.9716	C17:0.Abs.conc	110.71	15.1297	FALSE
4	C17:0	WN125	b1	Fat	RIL	Abs.conc	72.2208	C17:0.Abs.conc	89.798	35.4169	FALSE
4	C17:0	WN126	b1	Fat	RIL	Abs.conc	54.3216	C17:0.Abs.conc	56.1161	50.5641	FALSE
4	C17:0	WN134	b1	Fat	RIL	Abs.conc	24.0693	C17:0.Abs.conc	107.209	10.9557	FALSE
4	C17:0	WN135	b1	Fat	RIL	Abs.conc	33.33	C17:0.Abs.conc	64.7296	26.3894	FALSE
4	C17:0	WN140	b1	Fat	RIL	Abs.conc	52.3787	C17:0.Abs.conc	75.9217	30.4102	FALSE
4	C17:0	WN146	b1	Fat	RIL	Abs.conc	40.9738	C17:0.Abs.conc	83.3806	31.2721	FALSE
4	C17:0	WN152	b1	Fat	RIL	Abs.conc	43.6239	C17:0.Abs.conc	50.4297	32.7102	FALSE
4	C17:0	WN153	b1	Fat	RIL	Abs.conc	36.1661	C17:0.Abs.conc	82.083	22.8301	FALSE
4	C17:0	WN158	b1	Fat	RIL	Abs.conc	59.6987	C17:0.Abs.conc	107.608	52.3878	FALSE
4	C17:0	WN159	b1	Fat	RIL	Abs.conc	38.7742	C17:0.Abs.conc	114.328	18.714	FALSE
4	C17:0	WN161	b1	Fat	RIL	Abs.conc	40.4837	C17:0.Abs.conc	76.8352	28.7406	FALSE
4	C17:0	WN162	b1	Fat	RIL	Abs.conc	67.0699	C17:0.Abs.conc	75.8734	32.299	FALSE
4	C17:0	WN171	b1	Fat	RIL	Abs.conc	48.4226	C17:0.Abs.conc	89.7573	26.8575	FALSE
4	C17:0	WN174	b1	Fat	RIL	Abs.conc	39.2339	C17:0.Abs.conc	68.8685	18.9726	FALSE
4	C17:0	WN176	b1	Fat	RIL	Abs.conc	84.1484	C17:0.Abs.conc	100.204	50.6771	FALSE
4	C17:0	WN177	b1	Fat	RIL	Abs.conc	49.5117	C17:0.Abs.conc	74.8619	37.5341	FALSE
4	C17:0	WN185	b1	Fat	RIL	Abs.conc	55.1038	C17:0.Abs.conc	94.2888	42.8187	FALSE
4	C17:0	WN186	b1	Fat	RIL	Abs.conc	80.9186	C17:0.Abs.conc	89.4459	45.796	FALSE
4	C17:0	WN195	b1	Fat	RIL	Abs.conc	37.3787	C17:0.Abs.conc	57.6209	26.1192	FALSE
4	C17:1	CB4856	b1	Fat	PL_CB4856	Abs.conc	52.0455	C17:1.Abs.conc	61.6544	26.9697	FALSE
4	C17:1	N2	b1	Fat	PL_N2	Abs.conc	38.1308	C17:1.Abs.conc	54.2833	29.7424	FALSE
4	C17:1	WN012	b1	Fat	RIL	Abs.conc	36.7255	C17:1.Abs.conc			FALSE
4	C17:1	WN014	b1	Fat	RIL	Abs.conc	27.091	C17:1.Abs.conc	38.8792	21.4611	FALSE
4	C17:1	WN015	b1	Fat	RIL	Abs.conc	42.5019	C17:1.Abs.conc			FALSE
4	C17:1	WN017	b1	Fat	RIL	Abs.conc	46.0382	C17:1.Abs.conc			FALSE
4	C17:1	WN018	b1	Fat	RIL	Abs.conc	33.9402	C17:1.Abs.conc	35.4991	30.676	FALSE
4	C17:1	WN022	b1	Fat	RIL	Abs.conc	39.0706	C17:1.Abs.conc			FALSE
4	C17:1	WN027	b1	Fat	RIL	Abs.conc	54.0702	C17:1.Abs.conc			FALSE
4	C17:1	WN028	b1	Fat	RIL	Abs.conc	41.8708	C17:1.Abs.conc			FALSE
4	C17:1	WN029	b1	Fat	RIL	Abs.conc	24.3735	C17:1.Abs.conc			FALSE
4	C17:1	WN032	b1	Fat	RIL	Abs.conc	33.4302	C17:1.Abs.conc			FALSE
4	C17:1	WN034	b1	Fat	RIL	Abs.conc	30.6323	C17:1.Abs.conc	40.8857	27.9743	FALSE
4	C17:1	WN035	b1	Fat	RIL	Abs.conc	21.8211	C17:1.Abs.conc	42.9439	11.733	FALSE
4	C17:1	WN036	b1	Fat	RIL	Abs.conc	40.5438	C17:1.Abs.conc	88.5892	22.6179	FALSE
4	C17:1	WN039	b1	Fat	RIL	Abs.conc	37.797	C17:1.Abs.conc			FALSE
4	C17:1	WN041	b1	Fat	RIL	Abs.conc	35.0986	C17:1.Abs.conc	84.9445	19.4878	FALSE
4	C17:1	WN042	b1	Fat	RIL	Abs.conc	40.9753	C17:1.Abs.conc			FALSE
4	C17:1	WN043	b1	Fat	RIL	Abs.conc	56.2	C17:1.Abs.conc	72.3602	22.3631	FALSE
4	C17:1	WN044	b1	Fat	RIL	Abs.conc	40.1207	C17:1.Abs.conc			FALSE
4	C17:1	WN047	b1	Fat	RIL	Abs.conc	23.4272	C17:1.Abs.conc			FALSE
4	C17:1	WN048	b1	Fat	RIL	Abs.conc	36.9807	C17:1.Abs.conc	69.209	24.6051	FALSE
4	C17:1	WN058	b1	Fat	RIL	Abs.conc	50.3172	C17:1.Abs.conc	60.7029	31.6335	FALSE
4	C17:1	WN072	b1	Fat	RIL	Abs.conc	31.8331	C17:1.Abs.conc	55.3398	24.5572	FALSE
4	C17:1	WN073	b1	Fat	RIL	Abs.conc	36.4614	C17:1.Abs.conc			FALSE
4	C17:1	WN083	b1	Fat	RIL	Abs.conc	33.7855	C17:1.Abs.conc			FALSE
4	C17:1	WN087	b1	Fat	RIL	Abs.conc	31.5804	C17:1.Abs.conc			FALSE
4	C17:1	WN088	b1	Fat	RIL	Abs.conc	35.4838	C17:1.Abs.conc			FALSE
4	C17:1	WN091	b1	Fat	RIL	Abs.conc	47.9462	C17:1.Abs.conc			FALSE
4	C17:1	WN092	b1	Fat	RIL	Abs.conc	43.1701	C17:1.Abs.conc			FALSE
4	C17:1	WN094	b1	Fat	RIL	Abs.conc	83.1992	C17:1.Abs.conc	122.004	1.94935	FALSE
4	C17:1	WN113	b1	Fat	RIL	Abs.conc	31.9578	C17:1.Abs.conc	69.0393	17.6642	FALSE
4	C17:1	WN125	b1	Fat	RIL	Abs.conc	57.7983	C17:1.Abs.conc	67.9512	36.5397	FALSE
4	C17:1	WN126	b1	Fat	RIL	Abs.conc	33.2711	C17:1.Abs.conc	35.3066	29.009	FALSE
4	C17:1	WN134	b1	Fat	RIL	Abs.conc	17.877	C17:1.Abs.conc	64.0594	10.7408	FALSE
4	C17:1	WN135	b1	Fat	RIL	Abs.conc	25.0322	C17:1.Abs.conc	50.3581	19.5791	FALSE
4	C17:1	WN140	b1	Fat	RIL	Abs.conc	35.4758	C17:1.Abs.conc	52.6386	21.6404	FALSE
4	C17:1	WN146	b1	Fat	RIL	Abs.conc	41.7051	C17:1.Abs.conc	70.712	32.8857	FALSE
4	C17:1	WN152	b1	Fat	RIL	Abs.conc	29.5558	C17:1.Abs.conc	33.3433	11.1615	FALSE
4	C17:1	WN153	b1	Fat	RIL	Abs.conc	22.7807	C17:1.Abs.conc	48.6038	0.727401	FALSE
4	C17:1	WN158	b1	Fat	RIL	Abs.conc	51.5898	C17:1.Abs.conc	64.829	41.1922	FALSE
4	C17:1	WN159	b1	Fat	RIL	Abs.conc	34.8556	C17:1.Abs.conc	82.9256	16.3112	FALSE
4	C17:1	WN161	b1	Fat	RIL	Abs.conc	32.0078	C17:1.Abs.conc	36.8249	10.932	FALSE
4	C17:1	WN162	b1	Fat	RIL	Abs.conc	52.1519	C17:1.Abs.conc	61.1632	26.9315	FALSE
4	C17:1	WN171	b1	Fat	RIL	Abs.conc	39.9497	C17:1.Abs.conc	67.8679	20.6901	FALSE
4	C17:1	WN174	b1	Fat	RIL	Abs.conc	39.1478	C17:1.Abs.conc	48.3475	18.4284	FALSE
4	C17:1	WN176	b1	Fat	RIL	Abs.conc	59.8974	C17:1.Abs.conc	71.4445	33.3091	FALSE
4	C17:1	WN177	b1	Fat	RIL	Abs.conc	43.28	C17:1.Abs.conc	48.0455	26.6063	FALSE
4	C17:1	WN185	b1	Fat	RIL	Abs.conc	48.5949	C17:1.Abs.conc	57.7203	29.8729	FALSE
4	C17:1	WN186	b1	Fat	RIL	Abs.conc	73.4671	C17:1.Abs.conc	88.2344	19.1923	FALSE
4	C17:1	WN195	b1	Fat	RIL	Abs.conc	38.362	C17:1.Abs.conc	58.2546	25.0591	FALSE
4	C18:0	CB4856	b1	Fat	PL_CB4856	Abs.conc	44.3786	C18:0.Abs.conc	61.5885	16.753	FALSE
4	C18:0	N2	b1	Fat	PL_N2	Abs.conc	26.1487	C18:0.Abs.conc	41.9759	16.3441	FALSE
4	C18:0	WN012	b1	Fat	RIL	Abs.conc	27.6795	C18:0.Abs.conc			FALSE
4	C18:0	WN014	b1	Fat	RIL	Abs.conc	23.1073	C18:0.Abs.conc	25.504	21.9626	FALSE
4	C18:0	WN015	b1	Fat	RIL	Abs.conc	35.895	C18:0.Abs.conc			FALSE
4	C18:0	WN017	b1	Fat	RIL	Abs.conc	31.1946	C18:0.Abs.conc			FALSE
4	C18:0	WN018	b1	Fat	RIL	Abs.conc	29.8764	C18:0.Abs.conc	40.4015	24.8497	FALSE
4	C18:0	WN022	b1	Fat	RIL	Abs.conc	27.8104	C18:0.Abs.conc			FALSE
4	C18:0	WN027	b1	Fat	RIL	Abs.conc	41.6044	C18:0.Abs.conc			FALSE
4	C18:0	WN028	b1	Fat	RIL	Abs.conc	32.1132	C18:0.Abs.conc			FALSE
4	C18:0	WN029	b1	Fat	RIL	Abs.conc	23.0835	C18:0.Abs.conc			FALSE
4	C18:0	WN032	b1	Fat	RIL	Abs.conc	23.067	C18:0.Abs.conc			FALSE
4	C18:0	WN034	b1	Fat	RIL	Abs.conc	25.1638	C18:0.Abs.conc	41.8609	22.5753	FALSE
4	C18:0	WN035	b1	Fat	RIL	Abs.conc	34.2599	C18:0.Abs.conc	34.8565	33.0106	FALSE
4	C18:0	WN036	b1	Fat	RIL	Abs.conc	25.0545	C18:0.Abs.conc	78.0665	11.0042	FALSE
4	C18:0	WN039	b1	Fat	RIL	Abs.conc	29.9003	C18:0.Abs.conc			FALSE
4	C18:0	WN041	b1	Fat	RIL	Abs.conc	25.9901	C18:0.Abs.conc	73.1975	14.9056	FALSE
4	C18:0	WN042	b1	Fat	RIL	Abs.conc	31.6568	C18:0.Abs.conc			FALSE
4	C18:0	WN043	b1	Fat	RIL	Abs.conc	56.7511	C18:0.Abs.conc	83.2388	1.29024	FALSE
4	C18:0	WN044	b1	Fat	RIL	Abs.conc	29.5967	C18:0.Abs.conc			FALSE
4	C18:0	WN047	b1	Fat	RIL	Abs.conc	21.6397	C18:0.Abs.conc			FALSE
4	C18:0	WN048	b1	Fat	RIL	Abs.conc	25.3994	C18:0.Abs.conc	60.4359	13.5926	FALSE
4	C18:0	WN058	b1	Fat	RIL	Abs.conc	43.6544	C18:0.Abs.conc	50.0741	27.6705	FALSE
4	C18:0	WN072	b1	Fat	RIL	Abs.conc	22.1736	C18:0.Abs.conc	55.8003	14.0076	FALSE
4	C18:0	WN073	b1	Fat	RIL	Abs.conc	44.3248	C18:0.Abs.conc			FALSE
4	C18:0	WN083	b1	Fat	RIL	Abs.conc	27.8496	C18:0.Abs.conc			FALSE
4	C18:0	WN087	b1	Fat	RIL	Abs.conc	24.5715	C18:0.Abs.conc			FALSE
4	C18:0	WN088	b1	Fat	RIL	Abs.conc	35.2143	C18:0.Abs.conc			FALSE
4	C18:0	WN091	b1	Fat	RIL	Abs.conc	34.5842	C18:0.Abs.conc			FALSE
4	C18:0	WN092	b1	Fat	RIL	Abs.conc	30.477	C18:0.Abs.conc			FALSE
4	C18:0	WN094	b1	Fat	RIL	Abs.conc	71.7618	C18:0.Abs.conc	106.006	0.060846	FALSE
4	C18:0	WN113	b1	Fat	RIL	Abs.conc	20.5326	C18:0.Abs.conc	68.5357	8.94521	FALSE
4	C18:0	WN125	b1	Fat	RIL	Abs.conc	48.9368	C18:0.Abs.conc	60.7686	24.1631	FALSE
4	C18:0	WN126	b1	Fat	RIL	Abs.conc	26.1383	C18:0.Abs.conc	31.5627	23.5477	FALSE
4	C18:0	WN134	b1	Fat	RIL	Abs.conc	13.8202	C18:0.Abs.conc	58.4493	7.42827	FALSE
4	C18:0	WN135	b1	Fat	RIL	Abs.conc	30.5848	C18:0.Abs.conc	58.2162	25.5358	FALSE
4	C18:0	WN140	b1	Fat	RIL	Abs.conc	32.8241	C18:0.Abs.conc	51.149	21.6551	FALSE
4	C18:0	WN146	b1	Fat	RIL	Abs.conc	31.5311	C18:0.Abs.conc	62.8409	26.4145	FALSE
4	C18:0	WN152	b1	Fat	RIL	Abs.conc	29.3431	C18:0.Abs.conc	35.3163	17.6095	FALSE
4	C18:0	WN153	b1	Fat	RIL	Abs.conc	17.3954	C18:0.Abs.conc	65.333	6.98931	FALSE
4	C18:0	WN158	b1	Fat	RIL	Abs.conc	40.263	C18:0.Abs.conc	63.7496	31.7959	FALSE
4	C18:0	WN159	b1	Fat	RIL	Abs.conc	28.1219	C18:0.Abs.conc	77.589	13.2398	FALSE
4	C18:0	WN161	b1	Fat	RIL	Abs.conc	25.7683	C18:0.Abs.conc	39.4914	22.0347	FALSE
4	C18:0	WN162	b1	Fat	RIL	Abs.conc	43.0619	C18:0.Abs.conc	53.5038	32.3413	FALSE
4	C18:0	WN171	b1	Fat	RIL	Abs.conc	25.2469	C18:0.Abs.conc	58.3562	15.6476	FALSE
4	C18:0	WN174	b1	Fat	RIL	Abs.conc	31.6072	C18:0.Abs.conc	53.3518	16.6644	FALSE
4	C18:0	WN176	b1	Fat	RIL	Abs.conc	55.4905	C18:0.Abs.conc	63.2253	34.9486	FALSE
4	C18:0	WN177	b1	Fat	RIL	Abs.conc	33.9617	C18:0.Abs.conc	50.6389	25.2356	FALSE
4	C18:0	WN185	b1	Fat	RIL	Abs.conc	32.9113	C18:0.Abs.conc	46.2403	24.7657	FALSE
4	C18:0	WN186	b1	Fat	RIL	Abs.conc	64.1854	C18:0.Abs.conc	70.3176	29.8904	FALSE
4	C18:0	WN195	b1	Fat	RIL	Abs.conc	27.5611	C18:0.Abs.conc	52.5076	19.207	FALSE
4	C18:1	CB4856	b1	Fat	PL_CB4856	Abs.conc	242.182	C18:1.Abs.conc	297.307	60.2389	FALSE
4	C18:1	N2	b1	Fat	PL_N2	Abs.conc	172.193	C18:1.Abs.conc	215.395	107.162	FALSE
4	C18:1	WN012	b1	Fat	RIL	Abs.conc	172.681	C18:1.Abs.conc			FALSE
4	C18:1	WN014	b1	Fat	RIL	Abs.conc	119.913	C18:1.Abs.conc	226.841	68.845	FALSE
4	C18:1	WN015	b1	Fat	RIL	Abs.conc	177.385	C18:1.Abs.conc			FALSE
4	C18:1	WN017	b1	Fat	RIL	Abs.conc	210.062	C18:1.Abs.conc			FALSE
4	C18:1	WN018	b1	Fat	RIL	Abs.conc	165.005	C18:1.Abs.conc	185.312	122.486	FALSE
4	C18:1	WN022	b1	Fat	RIL	Abs.conc	163.988	C18:1.Abs.conc			FALSE
4	C18:1	WN027	b1	Fat	RIL	Abs.conc	243.837	C18:1.Abs.conc			FALSE
4	C18:1	WN028	b1	Fat	RIL	Abs.conc	206.621	C18:1.Abs.conc			FALSE
4	C18:1	WN029	b1	Fat	RIL	Abs.conc	110.732	C18:1.Abs.conc			FALSE
4	C18:1	WN032	b1	Fat	RIL	Abs.conc	133.849	C18:1.Abs.conc			FALSE
4	C18:1	WN034	b1	Fat	RIL	Abs.conc	159.948	C18:1.Abs.conc	184.675	153.584	FALSE
4	C18:1	WN035	b1	Fat	RIL	Abs.conc	92.9806	C18:1.Abs.conc	247.017	19.4138	FALSE
4	C18:1	WN036	b1	Fat	RIL	Abs.conc	169.993	C18:1.Abs.conc	376.262	104.265	FALSE
4	C18:1	WN039	b1	Fat	RIL	Abs.conc	181.087	C18:1.Abs.conc			FALSE
4	C18:1	WN041	b1	Fat	RIL	Abs.conc	147.226	C18:1.Abs.conc	313.549	97.5417	FALSE
4	C18:1	WN042	b1	Fat	RIL	Abs.conc	196.677	C18:1.Abs.conc			FALSE
4	C18:1	WN043	b1	Fat	RIL	Abs.conc	251.384	C18:1.Abs.conc	352.759	39.1235	FALSE
4	C18:1	WN044	b1	Fat	RIL	Abs.conc	158.147	C18:1.Abs.conc			FALSE
4	C18:1	WN047	b1	Fat	RIL	Abs.conc	89.5735	C18:1.Abs.conc			FALSE
4	C18:1	WN048	b1	Fat	RIL	Abs.conc	178.832	C18:1.Abs.conc	307.65	99.5693	FALSE
4	C18:1	WN058	b1	Fat	RIL	Abs.conc	229.733	C18:1.Abs.conc	255.501	118.094	FALSE
4	C18:1	WN072	b1	Fat	RIL	Abs.conc	136.803	C18:1.Abs.conc	253.727	108.994	FALSE
4	C18:1	WN073	b1	Fat	RIL	Abs.conc	231.204	C18:1.Abs.conc			FALSE
4	C18:1	WN083	b1	Fat	RIL	Abs.conc	171.313	C18:1.Abs.conc			FALSE
4	C18:1	WN087	b1	Fat	RIL	Abs.conc	153.014	C18:1.Abs.conc			FALSE
4	C18:1	WN088	b1	Fat	RIL	Abs.conc	175.968	C18:1.Abs.conc			FALSE
4	C18:1	WN091	b1	Fat	RIL	Abs.conc	197.121	C18:1.Abs.conc			FALSE
4	C18:1	WN092	b1	Fat	RIL	Abs.conc	192.004	C18:1.Abs.conc			FALSE
4	C18:1	WN094	b1	Fat	RIL	Abs.conc	366.158	C18:1.Abs.conc	523.221	37.2934	FALSE
4	C18:1	WN113	b1	Fat	RIL	Abs.conc	130.997	C18:1.Abs.conc	329.81	76.0109	FALSE
4	C18:1	WN125	b1	Fat	RIL	Abs.conc	264.931	C18:1.Abs.conc	336.744	114.565	FALSE
4	C18:1	WN126	b1	Fat	RIL	Abs.conc	158.65	C18:1.Abs.conc	185.01	146.061	FALSE
4	C18:1	WN134	b1	Fat	RIL	Abs.conc	81.9097	C18:1.Abs.conc	291.956	49.3374	FALSE
4	C18:1	WN135	b1	Fat	RIL	Abs.conc	104.565	C18:1.Abs.conc	290.492	67.8921	FALSE
4	C18:1	WN140	b1	Fat	RIL	Abs.conc	179.803	C18:1.Abs.conc	243.097	104.959	FALSE
4	C18:1	WN146	b1	Fat	RIL	Abs.conc	189.153	C18:1.Abs.conc	284.911	158.535	FALSE
4	C18:1	WN152	b1	Fat	RIL	Abs.conc	151.428	C18:1.Abs.conc	165.019	73.7347	FALSE
4	C18:1	WN153	b1	Fat	RIL	Abs.conc	102.71	C18:1.Abs.conc	253.1	44.1121	FALSE
4	C18:1	WN158	b1	Fat	RIL	Abs.conc	204.147	C18:1.Abs.conc	283.537	179.671	FALSE
4	C18:1	WN159	b1	Fat	RIL	Abs.conc	159.779	C18:1.Abs.conc	380.371	73.5142	FALSE
4	C18:1	WN161	b1	Fat	RIL	Abs.conc	156.957	C18:1.Abs.conc	175.579	108.898	FALSE
4	C18:1	WN162	b1	Fat	RIL	Abs.conc	248.35	C18:1.Abs.conc	284.18	161.785	FALSE
4	C18:1	WN171	b1	Fat	RIL	Abs.conc	166.145	C18:1.Abs.conc	319.148	91.2922	FALSE
4	C18:1	WN174	b1	Fat	RIL	Abs.conc	193.295	C18:1.Abs.conc	281.972	74.1433	FALSE
4	C18:1	WN176	b1	Fat	RIL	Abs.conc	284.858	C18:1.Abs.conc	327.604	125.235	FALSE
4	C18:1	WN177	b1	Fat	RIL	Abs.conc	191.352	C18:1.Abs.conc	232.985	146.948	FALSE
4	C18:1	WN185	b1	Fat	RIL	Abs.conc	230.312	C18:1.Abs.conc	273.073	135.809	FALSE
4	C18:1	WN186	b1	Fat	RIL	Abs.conc	371.109	C18:1.Abs.conc	401.167	119.615	FALSE
4	C18:1	WN195	b1	Fat	RIL	Abs.conc	171.579	C18:1.Abs.conc	243.493	105.517	FALSE
4	C18:2	CB4856	b1	Fat	PL_CB4856	Abs.conc	50.8016	C18:2.Abs.conc	51.9337	18.7088	FALSE
4	C18:2	N2	b1	Fat	PL_N2	Abs.conc	28.4309	C18:2.Abs.conc	42.6201	12.8898	FALSE
4	C18:2	WN012	b1	Fat	RIL	Abs.conc	30.4207	C18:2.Abs.conc			FALSE
4	C18:2	WN014	b1	Fat	RIL	Abs.conc	34.9817	C18:2.Abs.conc	35.2756	34.3663	FALSE
4	C18:2	WN015	b1	Fat	RIL	Abs.conc	40.959	C18:2.Abs.conc			FALSE
4	C18:2	WN017	b1	Fat	RIL	Abs.conc	35.5228	C18:2.Abs.conc			FALSE
4	C18:2	WN018	b1	Fat	RIL	Abs.conc	31.2501	C18:2.Abs.conc	40.8723	11.1028	FALSE
4	C18:2	WN022	b1	Fat	RIL	Abs.conc	35.1682	C18:2.Abs.conc			FALSE
4	C18:2	WN027	b1	Fat	RIL	Abs.conc	42.5533	C18:2.Abs.conc			FALSE
4	C18:2	WN028	b1	Fat	RIL	Abs.conc	35.9607	C18:2.Abs.conc			FALSE
4	C18:2	WN029	b1	Fat	RIL	Abs.conc	24.4366	C18:2.Abs.conc			FALSE
4	C18:2	WN032	b1	Fat	RIL	Abs.conc	29.9819	C18:2.Abs.conc			FALSE
4	C18:2	WN034	b1	Fat	RIL	Abs.conc	25.9671	C18:2.Abs.conc	27.6837	21.0311	FALSE
4	C18:2	WN035	b1	Fat	RIL	Abs.conc	24.3501	C18:2.Abs.conc	40.6948	16.5439	FALSE
4	C18:2	WN036	b1	Fat	RIL	Abs.conc	41.5825	C18:2.Abs.conc	58.7859	20.5164	FALSE
4	C18:2	WN039	b1	Fat	RIL	Abs.conc	32.5679	C18:2.Abs.conc			FALSE
4	C18:2	WN041	b1	Fat	RIL	Abs.conc	26.2212	C18:2.Abs.conc	48.8703	17.2477	FALSE
4	C18:2	WN042	b1	Fat	RIL	Abs.conc	36.8418	C18:2.Abs.conc			FALSE
4	C18:2	WN043	b1	Fat	RIL	Abs.conc	42.783	C18:2.Abs.conc	55.1844	16.8165	FALSE
4	C18:2	WN044	b1	Fat	RIL	Abs.conc	30.0786	C18:2.Abs.conc			FALSE
4	C18:2	WN047	b1	Fat	RIL	Abs.conc	18.0551	C18:2.Abs.conc			FALSE
4	C18:2	WN048	b1	Fat	RIL	Abs.conc	37.5995	C18:2.Abs.conc	47.3301	26.551	FALSE
4	C18:2	WN058	b1	Fat	RIL	Abs.conc	43.7258	C18:2.Abs.conc	53.5826	15.0126	FALSE
4	C18:2	WN072	b1	Fat	RIL	Abs.conc	28.649	C18:2.Abs.conc	39.0234	22.105	FALSE
4	C18:2	WN073	b1	Fat	RIL	Abs.conc	44.8418	C18:2.Abs.conc			FALSE
4	C18:2	WN083	b1	Fat	RIL	Abs.conc	38.6503	C18:2.Abs.conc			FALSE
4	C18:2	WN087	b1	Fat	RIL	Abs.conc	30.0364	C18:2.Abs.conc			FALSE
4	C18:2	WN088	b1	Fat	RIL	Abs.conc	28.8208	C18:2.Abs.conc			FALSE
4	C18:2	WN091	b1	Fat	RIL	Abs.conc	47.4383	C18:2.Abs.conc			FALSE
4	C18:2	WN092	b1	Fat	RIL	Abs.conc	39.5421	C18:2.Abs.conc			FALSE
4	C18:2	WN094	b1	Fat	RIL	Abs.conc	87.6609	C18:2.Abs.conc	125.182	9.09714	FALSE
4	C18:2	WN113	b1	Fat	RIL	Abs.conc	25.0935	C18:2.Abs.conc	70.1268	10.0795	FALSE
4	C18:2	WN125	b1	Fat	RIL	Abs.conc	63.7918	C18:2.Abs.conc	88.8447	11.335	FALSE
4	C18:2	WN126	b1	Fat	RIL	Abs.conc	35.441	C18:2.Abs.conc	36.5946	33.0257	FALSE
4	C18:2	WN134	b1	Fat	RIL	Abs.conc	17.7789	C18:2.Abs.conc	33.5501	14.468	FALSE
4	C18:2	WN135	b1	Fat	RIL	Abs.conc	19.7602	C18:2.Abs.conc	40.205	12.5754	FALSE
4	C18:2	WN140	b1	Fat	RIL	Abs.conc	34.9175	C18:2.Abs.conc	40.8523	6.67407	FALSE
4	C18:2	WN146	b1	Fat	RIL	Abs.conc	39.1894	C18:2.Abs.conc	49.9875	28.4019	FALSE
4	C18:2	WN152	b1	Fat	RIL	Abs.conc	32.8681	C18:2.Abs.conc	37.2602	3.36514	FALSE
4	C18:2	WN153	b1	Fat	RIL	Abs.conc	22.5763	C18:2.Abs.conc	53.3851	11.773	FALSE
4	C18:2	WN158	b1	Fat	RIL	Abs.conc	51.1391	C18:2.Abs.conc	55.1975	34.1186	FALSE
4	C18:2	WN159	b1	Fat	RIL	Abs.conc	25.6692	C18:2.Abs.conc	45.5137	16.0208	FALSE
4	C18:2	WN161	b1	Fat	RIL	Abs.conc	22.7863	C18:2.Abs.conc	34.8742	17.6664	FALSE
4	C18:2	WN162	b1	Fat	RIL	Abs.conc	49.2257	C18:2.Abs.conc	57.1469	10.4297	FALSE
4	C18:2	WN171	b1	Fat	RIL	Abs.conc	33.3383	C18:2.Abs.conc	55.1667	13.4415	FALSE
4	C18:2	WN174	b1	Fat	RIL	Abs.conc	32.9108	C18:2.Abs.conc	50.7613	4.79727	FALSE
4	C18:2	WN176	b1	Fat	RIL	Abs.conc	51.5093	C18:2.Abs.conc	59.3288	10.0598	FALSE
4	C18:2	WN177	b1	Fat	RIL	Abs.conc	40.6963	C18:2.Abs.conc	45.9622	13.5577	FALSE
4	C18:2	WN185	b1	Fat	RIL	Abs.conc	40.6497	C18:2.Abs.conc	46.0753	21.4388	FALSE
4	C18:2	WN186	b1	Fat	RIL	Abs.conc	82.5823	C18:2.Abs.conc	90.5938	18.6323	FALSE
4	C18:2	WN195	b1	Fat	RIL	Abs.conc	34.912	C18:2.Abs.conc	42.6314	14.4633	FALSE
4	C18:3	CB4856	b1	Fat	PL_CB4856	Abs.conc	18.4864	C18:3.Abs.conc	19.1151	5.58272	FALSE
4	C18:3	N2	b1	Fat	PL_N2	Abs.conc	9.85194	C18:3.Abs.conc	13.4658	6.2694	FALSE
4	C18:3	WN012	b1	Fat	RIL	Abs.conc	10.8512	C18:3.Abs.conc			FALSE
4	C18:3	WN014	b1	Fat	RIL	Abs.conc	7.37079	C18:3.Abs.conc	11.9705	5.174	FALSE
4	C18:3	WN015	b1	Fat	RIL	Abs.conc	11.6011	C18:3.Abs.conc			FALSE
4	C18:3	WN017	b1	Fat	RIL	Abs.conc	11.9436	C18:3.Abs.conc			FALSE
4	C18:3	WN018	b1	Fat	RIL	Abs.conc	7.78564	C18:3.Abs.conc	12.876	5.35455	FALSE
4	C18:3	WN022	b1	Fat	RIL	Abs.conc	12.1053	C18:3.Abs.conc			FALSE
4	C18:3	WN027	b1	Fat	RIL	Abs.conc	12.9267	C18:3.Abs.conc			FALSE
4	C18:3	WN028	b1	Fat	RIL	Abs.conc	14.4088	C18:3.Abs.conc			FALSE
4	C18:3	WN029	b1	Fat	RIL	Abs.conc	5.69244	C18:3.Abs.conc			FALSE
4	C18:3	WN032	b1	Fat	RIL	Abs.conc	9.59531	C18:3.Abs.conc			FALSE
4	C18:3	WN034	b1	Fat	RIL	Abs.conc	9.65793	C18:3.Abs.conc	10.7148	6.85262	FALSE
4	C18:3	WN035	b1	Fat	RIL	Abs.conc	2.40918	C18:3.Abs.conc	17.2961	-4.7007	FALSE
4	C18:3	WN036	b1	Fat	RIL	Abs.conc	13.1565	C18:3.Abs.conc	20.6293	7.29213	FALSE
4	C18:3	WN039	b1	Fat	RIL	Abs.conc	9.86151	C18:3.Abs.conc			FALSE
4	C18:3	WN041	b1	Fat	RIL	Abs.conc	8.35547	C18:3.Abs.conc	20.2733	5.17629	FALSE
4	C18:3	WN042	b1	Fat	RIL	Abs.conc	12.5314	C18:3.Abs.conc			FALSE
4	C18:3	WN043	b1	Fat	RIL	Abs.conc	7.07903	C18:3.Abs.conc	11.264	5.08032	FALSE
4	C18:3	WN044	b1	Fat	RIL	Abs.conc	11.8432	C18:3.Abs.conc			FALSE
4	C18:3	WN047	b1	Fat	RIL	Abs.conc	2.49755	C18:3.Abs.conc			FALSE
4	C18:3	WN048	b1	Fat	RIL	Abs.conc	9.42004	C18:3.Abs.conc	15.5027	5.61887	FALSE
4	C18:3	WN058	b1	Fat	RIL	Abs.conc	11.2224	C18:3.Abs.conc	13.2859	7.90811	FALSE
4	C18:3	WN072	b1	Fat	RIL	Abs.conc	5.8761	C18:3.Abs.conc	12.8186	4.47208	FALSE
4	C18:3	WN073	b1	Fat	RIL	Abs.conc	11.9438	C18:3.Abs.conc			FALSE
4	C18:3	WN083	b1	Fat	RIL	Abs.conc	10.6298	C18:3.Abs.conc			FALSE
4	C18:3	WN087	b1	Fat	RIL	Abs.conc	8.75949	C18:3.Abs.conc			FALSE
4	C18:3	WN088	b1	Fat	RIL	Abs.conc	9.09535	C18:3.Abs.conc			FALSE
4	C18:3	WN091	b1	Fat	RIL	Abs.conc	14.4805	C18:3.Abs.conc			FALSE
4	C18:3	WN092	b1	Fat	RIL	Abs.conc	11.0599	C18:3.Abs.conc			FALSE
4	C18:3	WN094	b1	Fat	RIL	Abs.conc	21.0518	C18:3.Abs.conc	29.359	3.65798	FALSE
4	C18:3	WN113	b1	Fat	RIL	Abs.conc	7.45705	C18:3.Abs.conc	13.564	3.73747	FALSE
4	C18:3	WN125	b1	Fat	RIL	Abs.conc	16.3783	C18:3.Abs.conc	20.1982	8.38027	FALSE
4	C18:3	WN126	b1	Fat	RIL	Abs.conc	6.83601	C18:3.Abs.conc	14.3945	3.22615	FALSE
4	C18:3	WN134	b1	Fat	RIL	Abs.conc	6.21558	C18:3.Abs.conc	16.1082	4.72927	FALSE
4	C18:3	WN135	b1	Fat	RIL	Abs.conc	4.37149	C18:3.Abs.conc	20.0391	1.43725	FALSE
4	C18:3	WN140	b1	Fat	RIL	Abs.conc	11.0214	C18:3.Abs.conc	13.4597	6.36602	FALSE
4	C18:3	WN146	b1	Fat	RIL	Abs.conc	11.729	C18:3.Abs.conc	18.1682	8.99831	FALSE
4	C18:3	WN152	b1	Fat	RIL	Abs.conc	9.80823	C18:3.Abs.conc	11.1711	1.41492	FALSE
4	C18:3	WN153	b1	Fat	RIL	Abs.conc	3.17805	C18:3.Abs.conc	15.7781	-2.35388	FALSE
4	C18:3	WN158	b1	Fat	RIL	Abs.conc	13.948	C18:3.Abs.conc	17.5686	7.67924	FALSE
4	C18:3	WN159	b1	Fat	RIL	Abs.conc	10.3084	C18:3.Abs.conc	18.1082	5.17376	FALSE
4	C18:3	WN161	b1	Fat	RIL	Abs.conc	10.5556	C18:3.Abs.conc	12.1633	1.31981	FALSE
4	C18:3	WN162	b1	Fat	RIL	Abs.conc	13.1406	C18:3.Abs.conc	15.1643	6.20361	FALSE
4	C18:3	WN171	b1	Fat	RIL	Abs.conc	7.33615	C18:3.Abs.conc	16.4987	3.84009	FALSE
4	C18:3	WN174	b1	Fat	RIL	Abs.conc	10.0819	C18:3.Abs.conc	18.2245	3.28314	FALSE
4	C18:3	WN176	b1	Fat	RIL	Abs.conc	18.0554	C18:3.Abs.conc	20.5631	9.47464	FALSE
4	C18:3	WN177	b1	Fat	RIL	Abs.conc	13.6257	C18:3.Abs.conc	15.1828	5.48737	FALSE
4	C18:3	WN185	b1	Fat	RIL	Abs.conc	15.1962	C18:3.Abs.conc	17.6841	1.60077	FALSE
4	C18:3	WN186	b1	Fat	RIL	Abs.conc	19.9494	C18:3.Abs.conc	21.7035	6.99179	FALSE
4	C18:3	WN195	b1	Fat	RIL	Abs.conc	9.87127	C18:3.Abs.conc	13.7219	5.08748	FALSE
4	C19:0	CB4856	b1	Fat	PL_CB4856	Abs.conc	10.5055	C19:0.Abs.conc	12.2348	3.44723	FALSE
4	C19:0	N2	b1	Fat	PL_N2	Abs.conc	5.64743	C19:0.Abs.conc	6.91743	4.45303	FALSE
4	C19:0	WN012	b1	Fat	RIL	Abs.conc	6.81886	C19:0.Abs.conc			FALSE
4	C19:0	WN014	b1	Fat	RIL	Abs.conc	5.17798	C19:0.Abs.conc	5.82101	3.83157	FALSE
4	C19:0	WN015	b1	Fat	RIL	Abs.conc	7.45623	C19:0.Abs.conc			FALSE
4	C19:0	WN017	b1	Fat	RIL	Abs.conc	6.2772	C19:0.Abs.conc			FALSE
4	C19:0	WN018	b1	Fat	RIL	Abs.conc	8.05601	C19:0.Abs.conc	9.27094	5.51215	FALSE
4	C19:0	WN022	b1	Fat	RIL	Abs.conc	5.89046	C19:0.Abs.conc			FALSE
4	C19:0	WN027	b1	Fat	RIL	Abs.conc	7.17969	C19:0.Abs.conc			FALSE
4	C19:0	WN028	b1	Fat	RIL	Abs.conc	6.82946	C19:0.Abs.conc			FALSE
4	C19:0	WN029	b1	Fat	RIL	Abs.conc	5.18305	C19:0.Abs.conc			FALSE
4	C19:0	WN032	b1	Fat	RIL	Abs.conc	4.65608	C19:0.Abs.conc			FALSE
4	C19:0	WN034	b1	Fat	RIL	Abs.conc	6.06533	C19:0.Abs.conc	11.5527	5.27635	FALSE
4	C19:0	WN035	b1	Fat	RIL	Abs.conc	6.42047	C19:0.Abs.conc	7.67582	5.82092	FALSE
4	C19:0	WN036	b1	Fat	RIL	Abs.conc	5.93961	C19:0.Abs.conc	13.6726	3.72925	FALSE
4	C19:0	WN039	b1	Fat	RIL	Abs.conc	7.29447	C19:0.Abs.conc			FALSE
4	C19:0	WN041	b1	Fat	RIL	Abs.conc	5.56468	C19:0.Abs.conc	11.1151	3.92569	FALSE
4	C19:0	WN042	b1	Fat	RIL	Abs.conc	6.21437	C19:0.Abs.conc			FALSE
4	C19:0	WN043	b1	Fat	RIL	Abs.conc	11.9611	C19:0.Abs.conc	17.4526	0.462686	FALSE
4	C19:0	WN044	b1	Fat	RIL	Abs.conc	5.5534	C19:0.Abs.conc			FALSE
4	C19:0	WN047	b1	Fat	RIL	Abs.conc	5.56486	C19:0.Abs.conc			FALSE
4	C19:0	WN048	b1	Fat	RIL	Abs.conc	5.84595	C19:0.Abs.conc	10.5747	3.58093	FALSE
4	C19:0	WN058	b1	Fat	RIL	Abs.conc	8.67608	C19:0.Abs.conc	10.5922	5.42232	FALSE
4	C19:0	WN072	b1	Fat	RIL	Abs.conc	5.4294	C19:0.Abs.conc	9.74835	3.71272	FALSE
4	C19:0	WN073	b1	Fat	RIL	Abs.conc	8.15572	C19:0.Abs.conc			FALSE
4	C19:0	WN083	b1	Fat	RIL	Abs.conc	6.77901	C19:0.Abs.conc			FALSE
4	C19:0	WN087	b1	Fat	RIL	Abs.conc	5.91097	C19:0.Abs.conc			FALSE
4	C19:0	WN088	b1	Fat	RIL	Abs.conc	4.58697	C19:0.Abs.conc			FALSE
4	C19:0	WN091	b1	Fat	RIL	Abs.conc	7.76218	C19:0.Abs.conc			FALSE
4	C19:0	WN092	b1	Fat	RIL	Abs.conc	6.18473	C19:0.Abs.conc			FALSE
4	C19:0	WN094	b1	Fat	RIL	Abs.conc	13.0268	C19:0.Abs.conc	19.4007	-0.319143	FALSE
4	C19:0	WN113	b1	Fat	RIL	Abs.conc	4.87791	C19:0.Abs.conc	16.2363	1.91856	FALSE
4	C19:0	WN125	b1	Fat	RIL	Abs.conc	10.4075	C19:0.Abs.conc	13.0945	4.78138	FALSE
4	C19:0	WN126	b1	Fat	RIL	Abs.conc	7.75524	C19:0.Abs.conc	9.01602	5.11536	FALSE
4	C19:0	WN134	b1	Fat	RIL	Abs.conc	3.70576	C19:0.Abs.conc	13.8546	2.11199	FALSE
4	C19:0	WN135	b1	Fat	RIL	Abs.conc	5.44909	C19:0.Abs.conc	10.1827	4.34576	FALSE
4	C19:0	WN140	b1	Fat	RIL	Abs.conc	8.53365	C19:0.Abs.conc	11.057	4.95413	FALSE
4	C19:0	WN146	b1	Fat	RIL	Abs.conc	5.46073	C19:0.Abs.conc	10.675	4.2749	FALSE
4	C19:0	WN152	b1	Fat	RIL	Abs.conc	6.76472	C19:0.Abs.conc	7.56388	4.17792	FALSE
4	C19:0	WN153	b1	Fat	RIL	Abs.conc	5.9155	C19:0.Abs.conc	15.4988	3.01317	FALSE
4	C19:0	WN158	b1	Fat	RIL	Abs.conc	9.26933	C19:0.Abs.conc	14.9429	8.35742	FALSE
4	C19:0	WN159	b1	Fat	RIL	Abs.conc	5.95966	C19:0.Abs.conc	17.152	2.77614	FALSE
4	C19:0	WN161	b1	Fat	RIL	Abs.conc	5.58891	C19:0.Abs.conc	11.5427	4.31403	FALSE
4	C19:0	WN162	b1	Fat	RIL	Abs.conc	10.8134	C19:0.Abs.conc	12.3113	3.75372	FALSE
4	C19:0	WN171	b1	Fat	RIL	Abs.conc	5.69693	C19:0.Abs.conc	11.9149	2.92808	FALSE
4	C19:0	WN174	b1	Fat	RIL	Abs.conc	5.57218	C19:0.Abs.conc	7.46006	2.91515	FALSE
4	C19:0	WN176	b1	Fat	RIL	Abs.conc	12.4483	C19:0.Abs.conc	14.5834	7.4518	FALSE
4	C19:0	WN177	b1	Fat	RIL	Abs.conc	6.91214	C19:0.Abs.conc	9.46187	5.49466	FALSE
4	C19:0	WN185	b1	Fat	RIL	Abs.conc	6.86063	C19:0.Abs.conc	12.1862	5.53929	FALSE
4	C19:0	WN186	b1	Fat	RIL	Abs.conc	10.5193	C19:0.Abs.conc	12.1122	5.63425	FALSE
4	C19:0	WN195	b1	Fat	RIL	Abs.conc	4.79405	C19:0.Abs.conc	7.52722	3.52386	FALSE
4	C19:1	CB4856	b1	Fat	PL_CB4856	Abs.conc	29.3103	C19:1.Abs.conc	35.4973	15.2904	FALSE
4	C19:1	N2	b1	Fat	PL_N2	Abs.conc	23.2507	C19:1.Abs.conc	29.8994	18.0526	FALSE
4	C19:1	WN012	b1	Fat	RIL	Abs.conc	20.5135	C19:1.Abs.conc			FALSE
4	C19:1	WN014	b1	Fat	RIL	Abs.conc	15.4336	C19:1.Abs.conc	18.8424	13.8056	FALSE
4	C19:1	WN015	b1	Fat	RIL	Abs.conc	23.0455	C19:1.Abs.conc			FALSE
4	C19:1	WN017	b1	Fat	RIL	Abs.conc	26.3099	C19:1.Abs.conc			FALSE
4	C19:1	WN018	b1	Fat	RIL	Abs.conc	19.8489	C19:1.Abs.conc	20.9411	17.5622	FALSE
4	C19:1	WN022	b1	Fat	RIL	Abs.conc	21.9376	C19:1.Abs.conc			FALSE
4	C19:1	WN027	b1	Fat	RIL	Abs.conc	25.0538	C19:1.Abs.conc			FALSE
4	C19:1	WN028	b1	Fat	RIL	Abs.conc	22.7089	C19:1.Abs.conc			FALSE
4	C19:1	WN029	b1	Fat	RIL	Abs.conc	15.0518	C19:1.Abs.conc			FALSE
4	C19:1	WN032	b1	Fat	RIL	Abs.conc	16.4071	C19:1.Abs.conc			FALSE
4	C19:1	WN034	b1	Fat	RIL	Abs.conc	19.0775	C19:1.Abs.conc	35.4869	16.4279	FALSE
4	C19:1	WN035	b1	Fat	RIL	Abs.conc	13.3729	C19:1.Abs.conc	28.714	6.04611	FALSE
4	C19:1	WN036	b1	Fat	RIL	Abs.conc	23.4031	C19:1.Abs.conc	54.943	13.6081	FALSE
4	C19:1	WN039	b1	Fat	RIL	Abs.conc	21.3976	C19:1.Abs.conc			FALSE
4	C19:1	WN041	b1	Fat	RIL	Abs.conc	21.0797	C19:1.Abs.conc	49.7417	12.4191	FALSE
4	C19:1	WN042	b1	Fat	RIL	Abs.conc	24.2167	C19:1.Abs.conc			FALSE
4	C19:1	WN043	b1	Fat	RIL	Abs.conc	33.68	C19:1.Abs.conc	45.3245	9.29839	FALSE
4	C19:1	WN044	b1	Fat	RIL	Abs.conc	19.8237	C19:1.Abs.conc			FALSE
4	C19:1	WN047	b1	Fat	RIL	Abs.conc	14.413	C19:1.Abs.conc			FALSE
4	C19:1	WN048	b1	Fat	RIL	Abs.conc	22.8987	C19:1.Abs.conc	42.5867	15.1093	FALSE
4	C19:1	WN058	b1	Fat	RIL	Abs.conc	25.8728	C19:1.Abs.conc	32.5328	18.7696	FALSE
4	C19:1	WN072	b1	Fat	RIL	Abs.conc	22.065	C19:1.Abs.conc	36.2493	16.8053	FALSE
4	C19:1	WN073	b1	Fat	RIL	Abs.conc	20.7726	C19:1.Abs.conc			FALSE
4	C19:1	WN083	b1	Fat	RIL	Abs.conc	20.8157	C19:1.Abs.conc			FALSE
4	C19:1	WN087	b1	Fat	RIL	Abs.conc	18.5358	C19:1.Abs.conc			FALSE
4	C19:1	WN088	b1	Fat	RIL	Abs.conc	16.7573	C19:1.Abs.conc			FALSE
4	C19:1	WN091	b1	Fat	RIL	Abs.conc	25.5108	C19:1.Abs.conc			FALSE
4	C19:1	WN092	b1	Fat	RIL	Abs.conc	23.5197	C19:1.Abs.conc			FALSE
4	C19:1	WN094	b1	Fat	RIL	Abs.conc	43.8713	C19:1.Abs.conc	64.4985	0.681422	FALSE
4	C19:1	WN113	b1	Fat	RIL	Abs.conc	21.3534	C19:1.Abs.conc	51.4697	11.9559	FALSE
4	C19:1	WN125	b1	Fat	RIL	Abs.conc	32.2301	C19:1.Abs.conc	37.5313	21.1302	FALSE
4	C19:1	WN126	b1	Fat	RIL	Abs.conc	19.6777	C19:1.Abs.conc	21.5115	15.8382	FALSE
4	C19:1	WN134	b1	Fat	RIL	Abs.conc	10.1754	C19:1.Abs.conc	44.3417	4.64956	FALSE
4	C19:1	WN135	b1	Fat	RIL	Abs.conc	13.8704	C19:1.Abs.conc	31.4571	10.5233	FALSE
4	C19:1	WN140	b1	Fat	RIL	Abs.conc	23.4799	C19:1.Abs.conc	35.3812	13.4366	FALSE
4	C19:1	WN146	b1	Fat	RIL	Abs.conc	21.275	C19:1.Abs.conc	44.0686	15.2833	FALSE
4	C19:1	WN152	b1	Fat	RIL	Abs.conc	19.4846	C19:1.Abs.conc	21.4563	13.252	FALSE
4	C19:1	WN153	b1	Fat	RIL	Abs.conc	14.1231	C19:1.Abs.conc	31.6246	8.1977	FALSE
4	C19:1	WN158	b1	Fat	RIL	Abs.conc	28.4418	C19:1.Abs.conc	43.5644	24.837	FALSE
4	C19:1	WN159	b1	Fat	RIL	Abs.conc	19.8907	C19:1.Abs.conc	53.6353	8.68671	FALSE
4	C19:1	WN161	b1	Fat	RIL	Abs.conc	18.7136	C19:1.Abs.conc	25.3098	13.037	FALSE
4	C19:1	WN162	b1	Fat	RIL	Abs.conc	34.6441	C19:1.Abs.conc	40.0361	18.4115	FALSE
4	C19:1	WN171	b1	Fat	RIL	Abs.conc	20.1616	C19:1.Abs.conc	39.173	11.6167	FALSE
4	C19:1	WN174	b1	Fat	RIL	Abs.conc	20.5679	C19:1.Abs.conc	23.8914	11.3296	FALSE
4	C19:1	WN176	b1	Fat	RIL	Abs.conc	35.9716	C19:1.Abs.conc	43.7199	23.1825	FALSE
4	C19:1	WN177	b1	Fat	RIL	Abs.conc	22.2684	C19:1.Abs.conc	28.5039	17.5167	FALSE
4	C19:1	WN185	b1	Fat	RIL	Abs.conc	24.8637	C19:1.Abs.conc	35.4871	20.8097	FALSE
4	C19:1	WN186	b1	Fat	RIL	Abs.conc	38.5047	C19:1.Abs.conc	48.5339	12.546	FALSE
4	C19:1	WN195	b1	Fat	RIL	Abs.conc	19.7101	C19:1.Abs.conc	35.3459	12.0346	FALSE
4	C20:0	CB4856	b1	Fat	PL_CB4856	Abs.conc	5.00949	C20:0.Abs.conc	6.67698	2.03086	FALSE
4	C20:0	N2	b1	Fat	PL_N2	Abs.conc	3.28514	C20:0.Abs.conc	4.52531	2.52935	FALSE
4	C20:0	WN012	b1	Fat	RIL	Abs.conc	3.30717	C20:0.Abs.conc			FALSE
4	C20:0	WN014	b1	Fat	RIL	Abs.conc	3.92588	C20:0.Abs.conc	4.77014	2.15815	FALSE
4	C20:0	WN015	b1	Fat	RIL	Abs.conc	4.54578	C20:0.Abs.conc			FALSE
4	C20:0	WN017	b1	Fat	RIL	Abs.conc	3.8328	C20:0.Abs.conc			FALSE
4	C20:0	WN018	b1	Fat	RIL	Abs.conc	5.54125	C20:0.Abs.conc	6.94669	2.59849	FALSE
4	C20:0	WN022	b1	Fat	RIL	Abs.conc	3.38441	C20:0.Abs.conc			FALSE
4	C20:0	WN027	b1	Fat	RIL	Abs.conc	4.13055	C20:0.Abs.conc			FALSE
4	C20:0	WN028	b1	Fat	RIL	Abs.conc	3.90199	C20:0.Abs.conc			FALSE
4	C20:0	WN029	b1	Fat	RIL	Abs.conc	3.55285	C20:0.Abs.conc			FALSE
4	C20:0	WN032	b1	Fat	RIL	Abs.conc	2.68943	C20:0.Abs.conc			FALSE
4	C20:0	WN034	b1	Fat	RIL	Abs.conc	3.09652	C20:0.Abs.conc	4.80612	2.84295	FALSE
4	C20:0	WN035	b1	Fat	RIL	Abs.conc	4.15266	C20:0.Abs.conc	4.45965	3.50988	FALSE
4	C20:0	WN036	b1	Fat	RIL	Abs.conc	3.46199	C20:0.Abs.conc	8.33195	2.21113	FALSE
4	C20:0	WN039	b1	Fat	RIL	Abs.conc	3.65614	C20:0.Abs.conc			FALSE
4	C20:0	WN041	b1	Fat	RIL	Abs.conc	3.16521	C20:0.Abs.conc	8.12619	1.83817	FALSE
4	C20:0	WN042	b1	Fat	RIL	Abs.conc	3.54774	C20:0.Abs.conc			FALSE
4	C20:0	WN043	b1	Fat	RIL	Abs.conc	9.01198	C20:0.Abs.conc	14.0894	-1.61937	FALSE
4	C20:0	WN044	b1	Fat	RIL	Abs.conc	3.60115	C20:0.Abs.conc			FALSE
4	C20:0	WN047	b1	Fat	RIL	Abs.conc	2.92787	C20:0.Abs.conc			FALSE
4	C20:0	WN048	b1	Fat	RIL	Abs.conc	3.17429	C20:0.Abs.conc	5.938	2.17604	FALSE
4	C20:0	WN058	b1	Fat	RIL	Abs.conc	5.61155	C20:0.Abs.conc	6.09595	2.91626	FALSE
4	C20:0	WN072	b1	Fat	RIL	Abs.conc	2.68155	C20:0.Abs.conc	5.66687	2.04609	FALSE
4	C20:0	WN073	b1	Fat	RIL	Abs.conc	6.47187	C20:0.Abs.conc			FALSE
4	C20:0	WN083	b1	Fat	RIL	Abs.conc	3.37682	C20:0.Abs.conc			FALSE
4	C20:0	WN087	b1	Fat	RIL	Abs.conc	3.28056	C20:0.Abs.conc			FALSE
4	C20:0	WN088	b1	Fat	RIL	Abs.conc	4.278	C20:0.Abs.conc			FALSE
4	C20:0	WN091	b1	Fat	RIL	Abs.conc	4.14919	C20:0.Abs.conc			FALSE
4	C20:0	WN092	b1	Fat	RIL	Abs.conc	3.50284	C20:0.Abs.conc			FALSE
4	C20:0	WN094	b1	Fat	RIL	Abs.conc	9.25185	C20:0.Abs.conc	14.0099	-0.710828	FALSE
4	C20:0	WN113	b1	Fat	RIL	Abs.conc	2.61422	C20:0.Abs.conc	7.0554	1.37312	FALSE
4	C20:0	WN125	b1	Fat	RIL	Abs.conc	7.36	C20:0.Abs.conc	10.4399	0.911152	FALSE
4	C20:0	WN126	b1	Fat	RIL	Abs.conc	4.15654	C20:0.Abs.conc	4.73856	2.9379	FALSE
4	C20:0	WN134	b1	Fat	RIL	Abs.conc	1.97722	C20:0.Abs.conc	6.27418	1.33314	FALSE
4	C20:0	WN135	b1	Fat	RIL	Abs.conc	3.61319	C20:0.Abs.conc	6.77333	2.82748	FALSE
4	C20:0	WN140	b1	Fat	RIL	Abs.conc	4.23935	C20:0.Abs.conc	5.63754	2.97456	FALSE
4	C20:0	WN146	b1	Fat	RIL	Abs.conc	3.73605	C20:0.Abs.conc	6.66242	3.20714	FALSE
4	C20:0	WN152	b1	Fat	RIL	Abs.conc	4.04159	C20:0.Abs.conc	4.48925	1.71099	FALSE
4	C20:0	WN153	b1	Fat	RIL	Abs.conc	3.49487	C20:0.Abs.conc	6.01154	1.93039	FALSE
4	C20:0	WN158	b1	Fat	RIL	Abs.conc	4.83622	C20:0.Abs.conc	6.89517	4.01181	FALSE
4	C20:0	WN159	b1	Fat	RIL	Abs.conc	3.29456	C20:0.Abs.conc	8.59121	1.44972	FALSE
4	C20:0	WN161	b1	Fat	RIL	Abs.conc	3.10325	C20:0.Abs.conc	4.0608	2.3485	FALSE
4	C20:0	WN162	b1	Fat	RIL	Abs.conc	5.73521	C20:0.Abs.conc	6.55087	3.03016	FALSE
4	C20:0	WN171	b1	Fat	RIL	Abs.conc	3.53813	C20:0.Abs.conc	6.75724	1.57766	FALSE
4	C20:0	WN174	b1	Fat	RIL	Abs.conc	3.39577	C20:0.Abs.conc	6.21491	1.65036	FALSE
4	C20:0	WN176	b1	Fat	RIL	Abs.conc	7.68603	C20:0.Abs.conc	8.7	3.35069	FALSE
4	C20:0	WN177	b1	Fat	RIL	Abs.conc	4.14319	C20:0.Abs.conc	5.54778	3.31206	FALSE
4	C20:0	WN185	b1	Fat	RIL	Abs.conc	3.9291	C20:0.Abs.conc	5.16142	2.97544	FALSE
4	C20:0	WN186	b1	Fat	RIL	Abs.conc	8.98793	C20:0.Abs.conc	9.56717	2.15036	FALSE
4	C20:0	WN195	b1	Fat	RIL	Abs.conc	3.24021	C20:0.Abs.conc	5.78579	2.49806	FALSE
4	C20:1	CB4856	b1	Fat	PL_CB4856	Abs.conc	6.96492	C20:1.Abs.conc	11.6169	2.07972	FALSE
4	C20:1	N2	b1	Fat	PL_N2	Abs.conc	5.63845	C20:1.Abs.conc	8.7458	3.50032	FALSE
[truncated: 165,263 more rows]

## Sheet: Summary
trait_transformation	metabolite	met_max	met_min	met_mean	fold
Perc.batch	C25:1	0.000329618	4.76642e-05	0.0001258	1.0002
Perc.strain	C25:1	0.000339013	4.68996e-05	0.000120439	1.0002
Perc.strain	C27:1	0.000405265	4.40339e-05	0.000170355	1.00025
Perc.batch	C27:1	0.00039564	3.44095e-05	0.000171348	1.00025
Perc.strain	C29:1	0.000542705	5.23852e-05	0.000173093	1.00034
Perc.batch	C29:1	0.000547285	5.69657e-05	0.000175357	1.00034
Perc.strain	C29:0	0.000609907	2.55576e-05	0.000134797	1.00041
Perc.batch	C29:0	0.00055682	-2.75295e-05	0.000132586	1.00041
Perc.batch	C30:0	0.000592843	-3.55414e-05	0.000180282	1.00044
Perc.strain	C30:0	0.000738471	1.82693e-05	0.000173396	1.0005
Perc.strain	C24:5	0.000911914	0.000158017	0.000382067	1.00052
Perc.batch	C24:5	0.000825476	7.15796e-05	0.000336115	1.00052
Perc.batch	C24:1	0.00114471	0.000388798	0.000671381	1.00052
Perc.strain	C28:0	0.00080957	2.10683e-05	0.000187686	1.00055
Perc.batch	C28:0	0.000656191	-0.000132311	0.000200236	1.00055
Perc.strain	C24:1	0.00113035	0.00029641	0.000586858	1.00058
Perc.batch	C26:1	0.000633877	-0.000215688	0.000133041	1.00059
Perc.strain	C25:0	0.00112148	0.000256615	0.000497189	1.0006
Perc.strain	C26:1	0.000908531	4.1629e-05	0.000157251	1.0006
Perc.batch	C25:0	0.00109996	0.000134987	0.000453995	1.00067
Perc.strain	C22:4	0.0010437	5.10098e-05	0.000176799	1.00069
Perc.batch	C24:4	0.00112684	0.000118331	0.000471911	1.0007
Perc.strain	C24:4	0.0011183	6.42478e-05	0.000427304	1.00073
Perc.batch	C26:0	0.00134536	0.000258023	0.0006312	1.00075
Perc.strain	C26:0	0.00123995	0.000107339	0.000558219	1.00079
Perc.batch	C22:4	0.000902651	-0.000242413	0.000144994	1.00079
Perc.strain	C28:1	0.00141378	3.93947e-05	0.000352286	1.00095
Perc.batch	C28:1	0.00133687	-0.000103575	0.000345134	1.001
Perc.batch	C23:1	0.00202963	0.000481026	0.000936287	1.00107
Perc.batch	C27:0	0.00179297	7.69692e-05	0.000364075	1.00119
Perc.strain	C27:0	0.00194539	0.000212702	0.00040386	1.0012
Perc.batch	C22:5	0.00185737	-5.85257e-05	0.00015387	1.00133
Perc.strain	C22:5	0.00197589	4.16954e-05	0.000176663	1.00134
Perc.strain	C23:1	0.00212241	0.000184699	0.000832476	1.00134
Perc.batch	C21:1	0.00265584	0.000369205	0.00130781	1.00159
Perc.strain	C21:1	0.00272261	0.000158426	0.00116046	1.00178
Perc.strain	C23:0	0.00409915	0.00100491	0.00171211	1.00215
Perc.batch	C23:0	0.00399123	0.000634648	0.00151287	1.00233
Perc.strain	C24:0	0.00372116	0.000108999	0.00104036	1.00251
Perc.batch	C24:0	0.00351637	-0.000462515	0.000982173	1.00276
Perc.batch	C22:6	0.0048998	-2.47286e-05	0.00104013	1.00342
Perc.strain	C22:6	0.00562684	0.000483405	0.00121037	1.00357
Perc.batch	C15:1	0.00832043	0.000911019	0.00369106	1.00515
Perc.strain	C15:1	0.00980845	0.00222793	0.00393088	1.00527
Perc.batch	C20:0	0.0120404	0.00444733	0.00700785	1.00528
Perc.strain	C20:0	0.0124936	0.00460217	0.00703973	1.00548
Perc.batch	C21:0	0.0120184	0.00234547	0.00615037	1.00673
Perc.batch	C20:1	0.0177927	0.00804836	0.0113401	1.00678
Perc.strain	C21:0	0.0139472	0.00405886	0.0069745	1.00688
Perc.strain	C14:1	0.0143828	0.00369858	0.00761378	1.00743
Perc.batch	C14:1	0.0127016	0.00201745	0.00729777	1.00743
Perc.strain	C22:0	0.0144432	0.00334715	0.00653672	1.00772
Perc.strain	C20:1	0.0190771	0.00775712	0.0108935	1.00788
Perc.batch	C22:0	0.0138105	0.00233686	0.00598806	1.00798
Perc.batch	C19:0	0.0229033	0.00758395	0.0125758	1.01068
Perc.strain	C19:0	0.0241075	0.00865404	0.0133071	1.01077
Perc.batch	C24:6	0.0203482	0.0043303	0.0102232	1.01116
Perc.strain	C14:0	0.0251296	0.00858756	0.0166912	1.01153
Perc.batch	C18:3	0.0233765	0.00650052	0.017538	1.01177
Perc.strain	C18:3	0.0235897	0.0064458	0.0171523	1.01195
Perc.strain	C24:6	0.0233539	0.00615613	0.0112007	1.01199
Perc.batch	C14:0	0.0259713	0.00840921	0.0169555	1.01225
Perc.batch	C22:1	0.0204801	0.00116999	0.00306187	1.01347
Perc.strain	C22:1	0.0206413	0.00125411	0.00311684	1.01353
Perc.batch	Met	0.0307664	0.00983332	0.020588	1.01462
Perc.strain	Met	0.027786	0.00588079	0.0198367	1.0153
Perc.batch	Tyr	0.0408483	0.017459	0.029913	1.01634
Perc.batch	C19:1	0.0575265	0.031903	0.0418674	1.01792
Perc.batch	Trp	0.0323278	0.00590831	0.0117227	1.01848
Perc.strain	Tyr	0.0421845	0.0141407	0.0292253	1.01963
Perc.batch	Asp	0.0326568	0.00402482	0.011553	1.02004
Perc.batch	Phe	0.0596449	0.0306632	0.045698	1.02029
Perc.strain	Asp	0.0343616	0.00518153	0.0104484	1.02043
Perc.strain	C19:1	0.0581377	0.0287118	0.0411532	1.02061
Perc.batch	C20:3	0.0410053	0.011104	0.0281598	1.02094
Perc.strain	Trp	0.032736	0.00282258	0.0110626	1.02095
Perc.strain	C20:3	0.0382388	0.00608509	0.025581	1.02254
Perc.batch	Ser	0.0636083	0.0280714	0.0417457	1.02494
Perc.batch	Orn	0.0417276	0.00521664	0.0178736	1.02563
Perc.batch	C16:1	0.0590521	0.0218058	0.0331938	1.02615
Perc.strain	C16:1	0.0607675	0.0229868	0.0336251	1.02653
Perc.strain	Phe	0.0628497	0.0243345	0.0456649	1.02706
Perc.batch	Lys	0.0986178	0.0578338	0.0760902	1.02867
Perc.strain	Ser	0.0657547	0.023214	0.0424383	1.02993
Perc.strain	Orn	0.0484694	0.00566398	0.0215229	1.03012
Perc.batch	C20:4	0.0528806	0.00944951	0.0331059	1.03056
Perc.batch	Pro	0.0540859	0.00813297	0.0191849	1.03236
Perc.batch	C16:0	0.0620655	0.0150329	0.0370267	1.03314
Perc.batch	C17:1	0.100678	0.0501178	0.0712112	1.03567
Perc.strain	C16:0	0.055925	0.0049292	0.0332366	1.03598
Perc.strain	Pro	0.0635625	0.0116956	0.0203571	1.03661
Perc.batch	Ile	0.0770904	0.0243	0.0575477	1.03727
Perc.batch	Val	0.0901296	0.036828	0.0678507	1.03764
Perc.strain	C20:4	0.0570327	0.00312859	0.0292774	1.03807
Perc.batch	C18:0	0.0815876	0.0268513	0.0564957	1.03867
Perc.batch	Glu	0.101	0.044078	0.0620176	1.04024
Perc.batch	Gln	0.0802787	0.021172	0.0512891	1.04182
Perc.strain	C17:1	0.108432	0.0479097	0.0725173	1.04284
Perc.strain	C20:5	0.0654103	0.00297709	0.0382611	1.04423
Perc.strain	Lys	0.102102	0.0394188	0.0751534	1.04441
Perc.batch	C18:2	0.0928828	0.0278561	0.0588576	1.0461
Perc.strain	C18:0	0.0792628	0.0127724	0.0507759	1.04717
Perc.batch	Leu	0.106374	0.0389518	0.0772258	1.04784
Perc.strain	Glu	0.102581	0.0343398	0.0594346	1.04844
Perc.strain	C18:2	0.103827	0.0352385	0.0625909	1.04869
Perc.batch	C20:5	0.0749452	0.00352422	0.0416571	1.05075
Perc.batch	Cit	0.068524	-0.00461355	0.00581054	1.052
Perc.strain	Cit	0.0734602	0.000316848	0.00396241	1.05201
Perc.strain	Val	0.0904853	0.0139214	0.0657325	1.0545
Perc.batch	Asn	0.0792848	0.00252098	0.0288659	1.05465
Perc.strain	C15:0	0.138254	0.0605386	0.0931891	1.05535
Perc.batch	C15:0	0.125804	0.0445668	0.0922002	1.05792
Perc.batch	Arg	0.0945789	0.0108724	0.0673535	1.05974
Perc.strain	Arg	0.0994158	0.0152581	0.0646862	1.06007
Perc.batch	C17:0	0.148206	0.0632702	0.0923882	1.06064
Perc.strain	Ile	0.091073	0.00598773	0.0520582	1.06075
Perc.strain	Asn	0.0904374	0.00456652	0.0335469	1.06133
Perc.strain	Gln	0.0944907	0.00733659	0.0570823	1.06227
Perc.strain	Leu	0.112395	0.0171822	0.0770309	1.06822
Perc.strain	C17:0	0.162798	0.0666959	0.0977374	1.06888
Perc.strain	Gly	0.121498	0.0229034	0.0514228	1.07073
Perc.batch	C18:1	0.351858	0.243635	0.303447	1.0779
Perc.batch	Gly	0.124663	0.0147926	0.0592983	1.07913
Perc.strain	C18:1	0.371622	0.232427	0.309655	1.10129
Abs.conc	C29:1	0.185918	0.0319957	0.081142	1.11259
Abs.batch	C29:1	0.184765	0.0308425	0.0853652	1.11259
Abs.batch	C25:1	0.191866	0.0337608	0.0759051	1.11582
Abs.conc	C25:1	0.194565	0.0305272	0.0686261	1.12042
Abs.batch	C30:0	0.222872	0.0163219	0.0728032	1.15393
Abs.batch	C27:1	0.226696	0.0174718	0.0862412	1.15607
Abs.conc	C27:1	0.240973	0.0308551	0.0842844	1.15678
Perc.batch	Ala	0.353315	0.138507	0.250343	1.16055
Abs.conc	C30:0	0.244983	0.0301696	0.0665509	1.16055
Abs.conc	C22:4	0.25148	0.0345318	0.0804721	1.16227
Abs.conc	C29:0	0.252373	0.0304382	0.0617624	1.1663
Abs.batch	C29:0	0.23271	0.00966435	0.0641303	1.1672
Abs.conc	C22:5	0.273224	0.0307501	0.0849641	1.18302
Abs.batch	C22:5	0.260829	0.0169961	0.0776683	1.18413
Abs.batch	C22:4	0.22756	-0.0200613	0.0738677	1.18725
Abs.conc	C26:1	0.322278	0.0301513	0.0795301	1.22444
Abs.conc	C28:0	0.368466	0.0337051	0.105543	1.26117
Abs.batch	C28:0	0.302658	-0.0321036	0.113519	1.26117
Perc.strain	Ala	0.500947	0.165578	0.260715	1.2617
Abs.batch	C26:1	0.327587	-0.0142561	0.0738752	1.26737
Abs.conc	C27:0	0.545965	0.0848377	0.199903	1.37662
Abs.batch	C27:0	0.548559	0.085687	0.205478	1.37828
Abs.batch	C24:4	0.537392	0.0563525	0.277445	1.39575
Abs.conc	C24:4	0.563148	0.0342377	0.229915	1.44284
Abs.conc	C28:1	0.571183	0.0302274	0.180667	1.45494
Abs.batch	C28:1	0.516179	-0.0280371	0.181625	1.45823
Abs.batch	C24:5	0.627613	0.0697412	0.189812	1.4721
Abs.conc	C24:5	0.691349	0.0824915	0.192562	1.52505
Abs.conc	C25:0	0.729163	0.0850031	0.251639	1.56283
Abs.batch	C25:0	0.704714	0.0605543	0.259059	1.56283
Abs.conc	C26:0	0.779909	0.063398	0.309586	1.6432
Abs.batch	C26:0	0.909301	0.170504	0.37668	1.66878
Abs.batch	C24:1	1.08961	0.23674	0.401109	1.8061
Abs.conc	C24:1	1.03889	0.0726927	0.317105	1.95368
Abs.batch	C23:1	1.59834	0.252922	0.562126	2.54103
Abs.conc	C23:1	1.6389	0.076927	0.453137	2.95257
Abs.batch	C23:0	2.13344	0.301649	0.854564	3.55978
Abs.batch	C22:6	1.87011	-0.0166725	0.592949	3.69809
Abs.conc	C23:0	2.25639	0.356617	0.867	3.73153
Abs.batch	C24:0	1.79537	-0.128308	0.575619	3.79388
Abs.batch	C21:1	2.25274	0.252209	0.805664	4.00148
Abs.conc	C22:6	2.18858	0.187051	0.634687	4.00425
Abs.conc	C21:1	2.09711	0.0661439	0.674501	4.08678
Abs.conc	C24:0	2.22051	0.0348674	0.563495	4.54929
Abs.zscore	C25:1	2.38341	-0.917326	-0.0374857	9.85419
Abs.zscore	C28:0	1.87563	-1.50708	-0.035587	10.4303
Abs.zscore	Asp	2.34005	-1.23321	-0.00253736	11.903
Perc.zscore	C25:1	2.56812	-1.03478	-0.0363332	12.1501
Perc.zscore	C24:1	2.21583	-1.3969	-0.046351	12.2332
Abs.zscore	Gly	2.35856	-1.3259	-0.0112958	12.8569
Abs.zscore	Ile	1.66717	-2.09417	-0.00150415	13.5605
Abs.zscore	Glu	2.3087	-1.49851	0.000470664	13.9985
Perc.zscore	Glu	2.62726	-1.20432	0.00324872	14.2371
Perc.zscore	Val	1.63731	-2.19646	0.034875	14.2586
Perc.zscore	C27:1	2.38094	-1.45365	-3.56989e-16	14.2668
Abs.zscore	C29:1	2.49289	-1.3674	-7.57167e-17	14.5232
Abs.zscore	Trp	2.0439	-1.83491	-0.0372072	14.7109
Perc.zscore	Ile	1.44119	-2.44583	0.00223735	14.7948
Abs.zscore	Val	2.10458	-2.03832	0.0147699	17.666
Perc.zscore	C28:0	2.45743	-1.83982	-0.0274781	19.6607
Abs.zscore	Lys	2.86098	-1.46272	-0.00320292	20.0246
Abs.zscore	C27:1	2.95132	-1.44503	4.8837e-16	21.0588
Abs.zscore	Asn	2.58188	-1.83133	0.0110027	21.3063
Abs.zscore	Phe	2.34751	-2.06674	0.014959	21.3218
Abs.zscore	Tyr	2.2881	-2.12949	0.0246403	21.3712
Perc.zscore	C30:0	2.90231	-1.51829	-4.09622e-17	21.4156
Perc.zscore	C21:1	2.60317	-1.83001	-0.0103035	21.6034
Abs.zscore	Cit	3.75942	-0.714984	-0.0267873	22.2295
Perc.zscore	Asp	3.29273	-1.18571	-0.00819682	22.2919
Perc.zscore	C18:1	2.06952	-2.45205	0.0469315	22.9684
Abs.zscore	C24:4	2.42045	-2.12342	-0.0349904	23.326
Perc.zscore	C23:1	3.19775	-1.40365	-0.0509223	24.2749
Perc.zscore	Ser	2.75937	-1.85382	-0.0787002	24.4741
Perc.zscore	Tyr	2.23104	-2.38786	0.0715393	24.5714
Abs.zscore	Leu	2.60613	-2.03031	0.0115191	24.8718
Perc.zscore	Lys	2.57096	-2.11534	-0.017584	25.7465
Abs.zscore	Met	2.65804	-2.03636	0.0252341	25.8914
Abs.zscore	Ala	2.38115	-2.38572	-0.0142083	27.2251
Abs.zscore	C30:0	3.47521	-1.30796	1.05426e-17	27.5347
Perc.zscore	Leu	2.10172	-2.68695	0.0314581	27.6396
Perc.zscore	Gly	2.8374	-1.97007	-0.0226826	28.0023
Perc.zscore	Gln	2.36793	-2.44048	0.00959303	28.0205
Perc.zscore	C14:1	2.40337	-2.41734	-0.0348523	28.2603
Perc.zscore	Cit	4.14079	-0.7145	-0.0224893	28.946
Abs.zscore	C22:4	2.91197	-1.95897	-0.111299	29.2616
Abs.zscore	C21:1	3.54662	-1.37668	-0.0146336	30.3432
Abs.zscore	Ser	3.19546	-1.76519	-0.0338265	31.1389
Perc.zscore	C29:1	3.78886	-1.20606	1.59391e-16	31.8875
Perc.zscore	Met	2.49923	-2.50344	0.0667554	32.0591
Perc.zscore	C26:1	2.87244	-2.13526	-0.0796977	32.1713
Abs.zscore	C22:5	3.69588	-1.33188	-0.0808401	32.6218
Abs.zscore	C26:1	3.68843	-1.35902	-0.0577302	33.0701
Perc.zscore	C20:1	3.40568	-1.71941	0.0118802	34.8985
Perc.zscore	C24:6	3.22001	-1.9635	-0.0565239	36.3407
Perc.zscore	C28:1	3.43247	-1.7512	-0.136451	36.3446
Perc.zscore	C24:4	3.3154	-1.86927	-0.0515484	36.3698
Abs.zscore	C29:0	3.9332	-1.26954	0.00092688	36.8283
Abs.zscore	C24:1	4.19081	-1.02491	-0.0197175	37.1612
Abs.zscore	C28:1	3.05603	-2.16259	-0.152085	37.2359
Perc.zscore	Arg	1.71322	-3.51788	0.0118092	37.5593
Abs.zscore	Gln	3.18112	-2.08823	0.00236338	38.5684
Abs.zscore	Arg	2.55325	-2.77269	0.00765102	40.1112
Abs.zscore	C23:1	4.10431	-1.25861	-0.0261047	41.1529
Perc.zscore	C25:0	3.54664	-1.93693	-0.124134	44.7424
Perc.zscore	C24:5	3.48852	-2.02293	-0.0890141	45.6154
Abs.zscore	Pro	3.78792	-1.73673	0.000264849	46.0347
Perc.zscore	C24:0	3.47047	-2.12331	-0.0922721	48.2943
Perc.zscore	C20:4	2.62585	-3.0625	0.0358767	51.566
Perc.zscore	C15:1	3.46756	-2.23082	-0.0927618	51.9256
Perc.zscore	C18:3	2.03176	-3.74684	0.032581	54.895
Abs.zscore	C24:0	3.57997	-2.20093	-0.085534	54.9824
Perc.zscore	Orn	3.71383	-2.06904	-0.0643384	55.0577
Abs.zscore	Orn	4.31998	-1.47459	-0.0439942	55.5058
Perc.zscore	C22:4	3.72601	-2.11687	-0.140062	57.3959
Perc.zscore	C20:3	2.56967	-3.31344	0.0423047	59.0191
Perc.zscore	C21:0	3.50033	-2.43669	-0.101344	61.2664
Perc.zscore	C19:1	3.58111	-2.35904	-0.0490423	61.3994
Perc.zscore	C14:0	3.03344	-2.90964	-0.0175397	61.5238
Abs.zscore	C27:0	4.33206	-1.6445	-0.0977702	62.9685
Perc.zscore	C23:0	4.31728	-1.69687	-0.123322	64.6307
Perc.zscore	C16:1	4.20167	-1.82457	0.0179503	65.1747
Perc.zscore	Phe	2.96952	-3.08628	0.0552722	66.5238
Abs.zscore	C14:1	4.45474	-1.60592	-0.0205448	66.7486
Perc.zscore	Ala	2.90866	-3.19845	-0.0189118	68.9323
Perc.zscore	C29:0	4.46657	-1.68374	0.00148993	71.0274
Perc.zscore	C22:0	4.1207	-2.09702	-0.118383	74.4254
Perc.zscore	C17:1	3.6311	-2.63107	-0.0185456	76.754
Perc.zscore	C16:0	3.41291	-2.9069	0.0484196	79.8825
Perc.zscore	Trp	4.88836	-1.45834	-0.0615757	81.3856
Perc.zscore	C18:2	3.33682	-3.04661	-0.00330916	83.484
Abs.zscore	C22:6	4.2512	-2.16248	-0.0902097	85.2532
Perc.zscore	C15:0	2.63809	-3.82767	-0.0364593	88.3866
Perc.zscore	C20:0	4.18683	-2.29248	-0.107538	89.221
Abs.conc	C15:1	7.30216	0.73986	2.06383	94.5035
Abs.zscore	C24:5	5.1096	-1.46996	-0.0538421	95.6406
Abs.zscore	C24:6	5.17686	-1.40588	-0.0243433	95.8521
Perc.zscore	C26:0	4.33254	-2.26949	-0.00364579	97.1422
Abs.zscore	C26:0	4.75122	-1.8595	-0.0146503	97.7294
Perc.zscore	C19:0	4.43835	-2.24959	-0.0703193	103.103
Abs.batch	C15:1	7.04537	0.275436	2.14507	109.133
Perc.zscore	C20:5	3.22446	-3.6086	0.0396841	114.013
Abs.zscore	C23:0	4.72083	-2.17407	-0.092886	119.007
Abs.zscore	C20:4	4.42095	-2.64688	0.0149646	134.161
Perc.zscore	C17:0	4.59772	-2.49109	-0.0608698	136.127
Abs.zscore	C19:0	5.11436	-1.99371	-0.0332701	137.956
Abs.zscore	C25:0	4.88813	-2.2941	-0.0808202	145.233
Abs.batch	C22:0	8.75711	1.5606	3.40536	146.679
Perc.zscore	C18:0	3.32217	-3.91052	0.00660922	150.404
Perc.zscore	Asn	4.77781	-2.45863	0.0248733	150.795
Abs.conc	C22:0	8.69555	1.434	3.34421	153.442
Abs.zscore	C22:1	6.09563	-1.17199	-0.0669529	154.09
Abs.zscore	C22:0	5.34863	-1.95206	-0.080599	157.662
Abs.zscore	C15:1	5.23935	-2.06905	-0.0507109	158.507
Abs.batch	C21:0	8.7582	1.33118	3.47542	172.09
Abs.batch	C22:1	8.09356	0.652979	1.78432	173.715
Abs.conc	C21:0	9.15562	1.4213	3.52569	212.942
Abs.zscore	C20:3	5.14944	-2.65608	0.0146313	223.716
Abs.zscore	C20:1	6.38621	-1.42333	0.00938474	224.341
Abs.conc	C22:1	8.34186	0.513454	1.59635	227.292
Abs.zscore	C20:5	4.77874	-3.06636	0.0146484	229.937
Abs.zscore	C21:0	5.52396	-2.32466	-0.0587047	230.5
Abs.zscore	C16:1	6.24947	-1.64778	0.00826995	238.402
Perc.zscore	C22:1	7.17805	-0.883322	-0.0935193	267.125
Abs.zscore	C20:0	6.32754	-1.82493	-0.0486543	284.537
Abs.batch	C20:0	10.4519	2.28463	4.06414	287.479
Abs.zscore	C18:0	6.30833	-1.92869	-0.00298897	301.71
Abs.zscore	C16:0	6.72309	-1.59754	0.0167898	319.712
Abs.zscore	C15:0	6.45721	-2.03546	-0.0129959	360.204
Abs.zscore	C19:1	6.56604	-1.93487	-0.0128654	362.267
Abs.zscore	C14:0	6.61912	-1.91008	-0.0114475	369.442
Abs.conc	C20:0	9.8392	1.1083	3.67481	424.878
Abs.zscore	C17:0	6.66347	-2.16672	-0.0175034	455.147
Perc.zscore	C27:0	7.28621	-1.60319	-0.115906	474.217
Perc.zscore	Pro	6.85233	-2.13558	0.026071	507.727
Abs.zscore	C18:3	6.56142	-2.48772	0.0110366	529.741
Perc.zscore	C22:6	7.30674	-2.13803	-0.0957367	696.884
Abs.zscore	C17:1	7.76516	-1.90057	-0.00247236	812.219
Abs.zscore	C18:1	7.9874	-2.03048	0.0158837	1036.77
Abs.zscore	C18:2	8.79274	-1.96629	0.00478689	1732.97
Abs.batch	C14:1	13.0204	1.24325	4.32398	3509.79
Abs.conc	C14:1	13.4174	1.03994	4.10702	5320.78
Perc.zscore	C22:5	11.214	-1.42863	-0.0270669	6394.42
Abs.batch	C19:0	16.5812	3.68806	7.24405	7607.21
Abs.conc	C19:0	16.8467	1.88184	6.90025	31979.4
Abs.batch	C20:1	18.9763	3.90793	6.67234	34358
Abs.batch	C24:6	18.2378	2.54614	5.83939	52925.3
Abs.conc	C20:1	18.0692	1.36944	5.84616	106444
Abs.conc	C24:6	19.5352	1.89345	5.75284	204499
Abs.batch	Trp	24.146	3.57621	13.1097	1.55639e+06
Abs.batch	Asp	28.6234	4.39283	12.7381	1.96844e+07
Abs.batch	C14:0	31.1869	3.99277	10.0463	1.53549e+08
Abs.conc	Trp	29.9851	2.184	10.6793	2.3387e+08
Abs.conc	C14:0	30.3619	2.26093	9.04697	2.87899e+08
Abs.conc	C18:3	29.6425	0.774423	9.31169	4.89973e+08
Abs.batch	C18:3	31.8045	2.18803	10.3661	8.23079e+08
Abs.conc	Asp	32.8758	2.78666	10.1519	1.14216e+09
Abs.conc	C20:3	35.6356	1.16379	14.1822	2.38266e+10
Abs.batch	C20:3	41.6738	3.95259	16.8591	2.26577e+11
Abs.conc	C20:4	38.6209	0.654487	16.4541	2.68555e+11
Abs.batch	Pro	48.4702	7.23873	20.2023	2.5818e+12
Abs.batch	Orn	49.8473	6.78766	17.4184	9.16707e+12
Abs.batch	C20:4	46.8308	3.71603	19.9537	9.52436e+12
Abs.conc	Met	46.8755	3.72626	19.7681	9.75484e+12
Abs.conc	Pro	49.652	6.472	19.2019	9.96495e+12
Abs.batch	Met	48.0128	4.3131	23.5043	1.4286e+13
Abs.conc	Orn	52.18	4.3288	19.0143	253890545389662
Abs.batch	C19:1	63.9913	12.8707	24.4288	2448100157493665
Abs.conc	C20:5	53.9055	0.622794	21.4852	1.09571e+16
Abs.batch	Ser	80.0937	26.3249	45.0912	1.53468e+16
Abs.batch	Tyr	61.3702	7.4517	33.7438	1.70248e+16
Abs.batch	C16:1	63.3764	8.13311	19.7176	4.26457e+16
Abs.batch	C16:0	66.9714	11.6132	22.3536	4.61801e+16
Abs.conc	Ser	73.57	17.99	40.322	5.38576e+16
Abs.conc	C19:1	61.2141	5.33651	21.75	6.61969e+16
Abs.conc	C16:0	58.9114	1.82291	18.746	1.53232e+17
Abs.conc	C16:1	61.3605	3.85267	18.2687	2.04917e+17
Abs.batch	Asn	63.064	4.71336	29.0723	3.67528e+17
Abs.conc	Tyr	68.7078	7.181	28.7777	3.32217e+18
Abs.batch	C20:5	63.6632	-0.0369968	24.98	1.49858e+19
Abs.batch	Phe	84.9321	19.2571	50.2285	5.89011e+19
Abs.batch	Glu	107.08	40.8895	66.95	8.4186e+19
Abs.batch	C18:0	86.7678	17.5961	33.7675	6.64934e+20
Abs.conc	Asn	78.824	7.18428	30.7391	3.6788e+21
Abs.conc	Phe	84.7305	12.105	44.0313	7.28567e+21
Abs.conc	C18:0	76.663	1.43268	28.0248	4.43179e+22
Abs.conc	Glu	109.137	14.6032	57.0192	2.86852e+28
Abs.batch	Gln	109.278	14.4328	52.0622	3.55782e+28
Abs.batch	Lys	146.593	51.6123	83.6743	3.90932e+28
Abs.batch	Cit	88.1092	-6.90551	7.70846	4.00189e+28
Abs.conc	Cit	95.4187	0.403333	4.97666	4.00374e+28
Abs.conc	Gln	119.621	11.4559	52.1409	3.63814e+32
Abs.batch	C17:1	129.616	19.7523	41.3265	1.18068e+33
Abs.batch	Gly	138.343	25.7852	65.9455	7.64329e+33
Abs.batch	Ile	117.404	4.65196	67.3826	8.74175e+33
Abs.batch	C17:0	139.074	25.5939	53.2143	1.44834e+34
Abs.batch	C18:2	129.882	12.3727	33.9006	2.36493e+35
Abs.conc	C17:1	129.304	9.62012	38.147	1.06795e+36
Abs.conc	Arg	137.287	16.8941	63.3168	1.7449e+36
Abs.conc	Lys	153.063	29.7527	72.393	1.31818e+37
Abs.conc	C18:2	130.536	6.58029	32.8727	2.06255e+37
Abs.batch	Val	140.52	14.9277	77.1676	6.41495e+37
Abs.conc	C17:0	140.499	14.6553	50.6706	7.63266e+37
Abs.batch	C15:0	157.235	22.0665	54.2559	4.89382e+40
Abs.batch	Arg	142.951	0.64534	74.934	6.88901e+42
Abs.conc	Val	153.346	10.6397	65.2509	9.09866e+42
Abs.conc	Gly	158.977	15.5058	50.4186	1.54603e+43
Abs.batch	Leu	169.814	20.2392	86.1101	1.06287e+45
Abs.conc	Ile	154.297	4.57623	53.1921	1.17634e+45
Abs.conc	C15:0	160.831	11.0566	49.8213	1.22042e+45
Abs.conc	Leu	163.731	13.1318	75.3506	2.16193e+45
Abs.batch	Ala	450.93	80.8835	264.981	2.48302e+111
Abs.conc	Ala	555.835	102.76	244.796	2.45073e+136
Abs.batch	C18:1	544.912	83.3259	177.615	8.9406e+138
Abs.conc	C18:1	518.934	40.7943	165.09	8.5973e+143

## Sheet: Metabolite info
Metabolite	Name	ChEBI ID	Formula	InChI	InChI Key	SMILES
Alanine	Alanine	CHEBI:16449	C3H7NO2	InChI=1S/C3H7NO2/c1-2(4)3(5)6/h2H,4H2,1H3,(H,5,6)	QNAYBMKLOCPYGJ-UHFFFAOYSA-N	CC(N)C(O)=O
Arginine	Arginine	CHEBI:29016	C6H14N4O2	InChI=1S/C6H14N4O2/c7-4(5(11)12)2-1-3-10-6(8)9/h4H,1-3,7H2,(H,11,12)(H4,8,9,10)	ODKSFYDXXFIFQN-UHFFFAOYSA-N	NC(CCCNC(N)=N)C(O)=O
Asparagine	Asparagine	CHEBI:22653	C4H8N2O3	InChI=1S/C4H8N2O3/c5-2(4(8)9)1-3(6)7/h2H,1,5H2,(H2,6,7)(H,8,9)	DCXYFEDJOCDNAF-UHFFFAOYSA-N	NC(CC(N)=O)C(O)=O
Aspartic acid	Aspartic acid	CHEBI:22660	C4H7NO4	InChI=1S/C4H7NO4/c5-2(4(8)9)1-3(6)7/h2H,1,5H2,(H,6,7)(H,8,9)	CKLJMWTZIZZHCS-UHFFFAOYSA-N	NC(CC(O)=O)C(O)=O
Citruline	Citrulline	CHEBI:18211	C6H13N3O3	InChI=1S/C6H13N3O3/c7-4(5(10)11)2-1-3-9-6(8)12/h4H,1-3,7H2,(H,10,11)(H3,8,9,12)	RHGKLRLOHDJJDR-UHFFFAOYSA-N	NC(CCCNC(N)=O)C(O)=O
Glutamic acid	Glutamic acid	CHEBI:18237	C5H9NO4	InChI=1S/C5H9NO4/c6-3(5(9)10)1-2-4(7)8/h3H,1-2,6H2,(H,7,8)(H,9,10)	WHUUTDBJXJRKMK-UHFFFAOYSA-N	NC(CCC(O)=O)C(O)=O
Glutamine	Glutamine	CHEBI:28300	C5H10N2O3	InChI=1S/C5H10N2O3/c6-3(5(9)10)1-2-4(7)8/h3H,1-2,6H2,(H2,7,8)(H,9,10)	ZDXPYRJPNDTMRX-UHFFFAOYSA-N	NC(CCC(N)=O)C(O)=O
Glycine	Glycine	CHEBI:15428	C2H5NO2	InChI=1S/C2H5NO2/c3-1-2(4)5/h1,3H2,(H,4,5)	DHMQDGOQFOQNFH-UHFFFAOYSA-N	NCC(O)=O
Isoleucine	Isoleucine	CHEBI:17191	C6H13NO2	InChI=1S/C6H13NO2/c1-3-4(2)5(7)6(8)9/h4-5H,3,7H2,1-2H3,(H,8,9)/t4-,5-/m0/s1	AGPKZVBTJJNPAG-WHFBIAKZSA-N	CC[C@H](C)[C@H](N)C(O)=O
Leucine	Leucine	CHEBI:25017	C6H13NO2	InChI=1S/C6H13NO2/c1-4(2)3-5(7)6(8)9/h4-5H,3,7H2,1-2H3,(H,8,9)	ROHFNLRQFUQHCH-UHFFFAOYSA-N	CC(C)CC(N)C(O)=O
Lysine	Lysine	CHEBI:25094	C6H14N2O2	InChI=1S/C6H14N2O2/c7-4-2-1-3-5(8)6(9)10/h5H,1-4,7-8H2,(H,9,10)	KDXKERNSBIXSRK-UHFFFAOYSA-N	NCCCCC(N)C(O)=O
Methionine	Methionine	CHEBI:16811	C5H11NO2S	InChI=1S/C5H11NO2S/c1-9-3-2-4(6)5(7)8/h4H,2-3,6H2,1H3,(H,7,8)	FFEARJCKVFRZRR-UHFFFAOYSA-N	CSCCC(N)C(O)=O
Ornithine	Ornithine	CHEBI:18257	C5H12N2O2	InChI=1S/C5H12N2O2/c6-3-1-2-4(7)5(8)9/h4H,1-3,6-7H2,(H,8,9)	AHLPHDHHMVZTML-UHFFFAOYSA-N	NCCCC(N)C(O)=O
Phenylalanine	Phenylalanine	CHEBI:28044	C9H11NO2	InChI=1S/C9H11NO2/c10-8(9(11)12)6-7-4-2-1-3-5-7/h1-5,8H,6,10H2,(H,11,12)	COLNVLDHVKWLRT-UHFFFAOYSA-N	NC(Cc1ccccc1)C(O)=O
Proline	Proline	CHEBI:26271	C5H9NO2	InChI=1S/C5H9NO2/c7-5(8)4-2-1-3-6-4/h4,6H,1-3H2,(H,7,8)	ONIBWKKTOPOVIA-UHFFFAOYSA-N	OC(=O)C1CCCN1
Serine	Serine	CHEBI:17822	C3H7NO3	InChI=1S/C3H7NO3/c4-2(1-5)3(6)7/h2,5H,1,4H2,(H,6,7)	MTCFGRXMJLQNBG-UHFFFAOYSA-N	NC(CO)C(O)=O
Tryptophan	Tryptophan	CHEBI:27897	C11H12N2O2	InChI=1S/C11H12N2O2/c12-9(11(14)15)5-7-6-13-10-4-2-1-3-8(7)10/h1-4,6,9,13H,5,12H2,(H,14,15)	QIVBCDIJIAJPQS-UHFFFAOYSA-N	NC(Cc1c[nH]c2ccccc12)C(O)=O
Tyrosine	Tyrosine	CHEBI:18186	C9H11NO3	InChI=1S/C9H11NO3/c10-8(9(12)13)5-6-1-3-7(11)4-2-6/h1-4,8,11H,5,10H2,(H,12,13)	OUYCCCASQSFEME-UHFFFAOYSA-N	NC(Cc1ccc(O)cc1)C(O)=O
Valine	Valine	CHEBI:27266	C5H11NO2	InChI=1S/C5H11NO2/c1-3(2)4(6)5(7)8/h3-4H,6H2,1-2H3,(H,7,8)	KZSNJWFQEVHDMF-UHFFFAOYSA-N	CC(C)C(N)C(O)=O
C14:0	tetradecanoic acid	CHEBI:28875	C14H28O2	InChI=1S/C14H28O2/c1-2-3-4-5-6-7-8-9-10-11-12-13-14(15)16/h2-13H2,1H3,(H,15,16)	TUNFSRHWOTWDNC-UHFFFAOYSA-N	CCCCCCCCCCCCCC(O)=O
C15:0	pentadecanoic acid	CHEBI:42504	C15H30O2	InChI=1S/C15H30O2/c1-2-3-4-5-6-7-8-9-10-11-12-13-14-15(16)17/h2-14H2,1H3,(H,16,17)	WQEPLUUGTLDZJY-UHFFFAOYSA-N	CCCCCCCCCCCCCCC(O)=O
C16:0	hexadecanoic acid	CHEBI:15756	C16H32O2	InChI=1S/C16H32O2/c1-2-3-4-5-6-7-8-9-10-11-12-13-14-15-16(17)18/h2-15H2,1H3,(H,17,18)	IPCSVZSSVZVIGE-UHFFFAOYSA-N	CCCCCCCCCCCCCCCC(O)=O
C17:0	heptadecanoic acid	CHEBI:32365	C17H34O2	InChI=1S/C17H34O2/c1-2-3-4-5-6-7-8-9-10-11-12-13-14-15-16-17(18)19/h2-16H2,1H3,(H,18,19)	KEMQGTRYUADPNZ-UHFFFAOYSA-N	CCCCCCCCCCCCCCCCC(O)=O
C18:0	octadecanoic acid	CHEBI:28842	C18H36O2	InChI=1S/C18H36O2/c1-2-3-4-5-6-7-8-9-10-11-12-13-14-15-16-17-18(19)20/h2-17H2,1H3,(H,19,20)	QIQXTHQIDYTFRH-UHFFFAOYSA-N	C(CCCCCCCCCC)CCCCCCC(=O)O
C19:0	nonadecanoic acid	CHEBI:39246	C19H38O2	InChI=1S/C19H38O2/c1-2-3-4-5-6-7-8-9-10-11-12-13-14-15-16-17-18-19(20)21/h2-18H2,1H3,(H,20,21)	ISYWECDDZWTKFF-UHFFFAOYSA-N	CCCCCCCCCCCCCCCCCCC(O)=O
C20:0	arachidic acid	CHEBI:28822	C20H40O2	InChI=1S/C20H40O2/c1-2-3-4-5-6-7-8-9-10-11-12-13-14-15-16-17-18-19-20(21)22/h2-19H2,1H3,(H,21,22)	VKOBVWXKNCXXDE-UHFFFAOYSA-N	CCCCCCCCCCCCCCCCCCCC(O)=O
C21:0	henicosanoic acid	CHEBI:39248	C21H42O2	InChI=1S/C21H42O2/c1-2-3-4-5-6-7-8-9-10-11-12-13-14-15-16-17-18-19-20-21(22)23/h2-20H2,1H3,(H,22,23)	CKDDRHZIAZRDBW-UHFFFAOYSA-N	CCCCCCCCCCCCCCCCCCCCC(O)=O
C22:0	docosanoic acid	CHEBI:28941	C22H44O2	InChI=1S/C22H44O2/c1-2-3-4-5-6-7-8-9-10-11-12-13-14-15-16-17-18-19-20-21-22(23)24/h2-21H2,1H3,(H,23,24)	UKMSUNONTOPOIO-UHFFFAOYSA-N	CCCCCCCCCCCCCCCCCCCCCC(O)=O
C23:0	tricosanoic acid	CHEBI:42394	C23H46O2	InChI=1S/C23H46O2/c1-2-3-4-5-6-7-8-9-10-11-12-13-14-15-16-17-18-19-20-21-22-23(24)25/h2-22H2,1H3,(H,24,25)	XEZVDURJDFGERA-UHFFFAOYSA-N	CCCCCCCCCCCCCCCCCCCCCCC(O)=O
C24:0	tetracosanoic acid	CHEBI:28866	C24H48O2	InChI=1S/C24H48O2/c1-2-3-4-5-6-7-8-9-10-11-12-13-14-15-16-17-18-19-20-21-22-23-24(25)26/h2-23H2,1H3,(H,25,26)	QZZGJDVWLFXDLK-UHFFFAOYSA-N	CCCCCCCCCCCCCCCCCCCCCCCC(O)=O
C25:0	pentacosanoic acid	CHEBI:39420	C25H50O2	InChI=1S/C25H50O2/c1-2-3-4-5-6-7-8-9-10-11-12-13-14-15-16-17-18-19-20-21-22-23-24-25(26)27/h2-24H2,1H3,(H,26,27)	MWMPEAHGUXCSMY-UHFFFAOYSA-N	CCCCCCCCCCCCCCCCCCCCCCCCC(O)=O
C26:0	hexacosanoic acid	CHEBI:31009	C26H52O2	InChI=1S/C26H52O2/c1-2-3-4-5-6-7-8-9-10-11-12-13-14-15-16-17-18-19-20-21-22-23-24-25-26(27)28/h2-25H2,1H3,(H,27,28)	XMHIUKTWLZUKEX-UHFFFAOYSA-N	CCCCCCCCCCCCCCCCCCCCCCCCCC(O)=O
C27:0	heptacosanoic acid	CHEBI:78710	C27H54O2	InChI=1S/C27H54O2/c1-2-3-4-5-6-7-8-9-10-11-12-13-14-15-16-17-18-19-20-21-22-23-24-25-26-27(28)29/h2-26H2,1H3,(H,28,29)	VXZBFBRLRNDJCS-UHFFFAOYSA-N	CCCCCCCCCCCCCCCCCCCCCCCCCCC(O)=O
C28:0	octacosanoic acid	CHEBI:31001	C28H56O2	InChI=1S/C28H56O2/c1-2-3-4-5-6-7-8-9-10-11-12-13-14-15-16-17-18-19-20-21-22-23-24-25-26-27-28(29)30/h2-27H2,1H3,(H,29,30)	UTOPWMOLSKOLTQ-UHFFFAOYSA-N	C(CCCCCCCCCCCCCCCC)CCCCCCCCCCC(O)=O
C29:0	nonacosanoic acid	CHEBI:84867	C29H58O2	InChI=1S/C29H58O2/c1-2-3-4-5-6-7-8-9-10-11-12-13-14-15-16-17-18-19-20-21-22-23-24-25-26-27-28-29(30)31/h2-28H2,1H3,(H,30,31)	IHEJEKZAKSNRLY-UHFFFAOYSA-N	CCCCCCCCCCCCCCCCCCCCCCCCCCCCC(O)=O
C30:0	melissic acid	CHEBI:31003	C30H60O2	InChI=1S/C30H60O2/c1-2-3-4-5-6-7-8-9-10-11-12-13-14-15-16-17-18-19-20-21-22-23-24-25-26-27-28-29-30(31)32/h2-29H2,1H3,(H,31,32)	VHOCUJPBKOZGJD-UHFFFAOYSA-N	CCCCCCCCCCCCCCCCCCCCCCCCCCCCCC(O)=O
C14:1	tetradecenoic acid	CHEBI:36004	C14H26O2
C15:1	pentadecenoic acid	CHEBI:75088	C15H28O2
C16:1	palmitelaidic acid	CHEBI:59265	C16H30O2	InChI=1S/C16H30O2/c1-2-3-4-5-6-7-8-9-10-11-12-13-14-15-16(17)18/h7-8H,2-6,9-15H2,1H3,(H,17,18)/b8-7+	SECPZKHBENQXJG-BQYQJAHWSA-N	CCCCCC\C=C\CCCCCCCC(O)=O
C17:1	heptadecenoic acid	CHEBI:36001	C17H32O2
C18:1	oleic acid	CHEBI:16196	C18H34O2	InChI=1S/C18H34O2/c1-2-3-4-5-6-7-8-9-10-11-12-13-14-15-16-17-18(19)20/h9-10H,2-8,11-17H2,1H3,(H,19,20)/b10-9-	ZQPPMHVWECSIRJ-KTKRTIGZSA-N	CCCCCCCC\C=C/CCCCCCCC(O)=O
C19:1	10-nonadecenoic acid	CHEBI:83050	C19H36O2	InChI=1S/C19H36O2/c1-2-3-4-5-6-7-8-9-10-11-12-13-14-15-16-17-18-19(20)21/h9-10H,2-8,11-18H2,1H3,(H,20,21)	BBOWBNGUEWHNQZ-UHFFFAOYSA-N	CCCCCCCCC=CCCCCCCCCC(O)=O
C20:1	eicosenoic acid	CHEBI:32425	C20H38O2	InChI=1S/C20H38O2/c1-2-3-4-5-6-7-8-9-10-11-12-13-14-15-16-17-18-19-20(21)22/h9-10H,2-8,11-19H2,1H3,(H,21,22)/b10-9-	BITHHVVYSMSWAG-KTKRTIGZSA-N	CCCCCCCC\C=C/CCCCCCCCCC(O)=O
C21:1	cis-12-heneicosenoic acid		C21H40O2	InChI=1S/C21H40O2/c1-2-3-4-5-6-7-8-9-10-11-12-13-14-15-16-17-18-19-20-21(22)23/h9-10H,2-8,11-20H2,1H3,(H,22,23)/b10-9-	VXCUECWODRDENC-KTKRTIGZSA-N	CCCCCCCC/C=C\CCCCCCCCCCC(=O)O
C22:1	erucic acid	CHEBI:28792	C22H42O2	InChI=1S/C22H42O2/c1-2-3-4-5-6-7-8-9-10-11-12-13-14-15-16-17-18-19-20-21-22(23)24/h9-10H,2-8,11-21H2,1H3,(H,23,24)/b10-9-	DPUOLQHDNGRHBS-KTKRTIGZSA-N	CCCCCCCC\C=C/CCCCCCCCCCCC(O)=O
C23:1	tricosenoic acid	CHEBI:73734	C23H44O2
C24:1	cis-15-tetracosenoic acid	CHEBI:44247	C24H46O2	InChI=1S/C24H46O2/c1-2-3-4-5-6-7-8-9-10-11-12-13-14-15-16-17-18-19-20-21-22-23-24(25)26/h9-10H,2-8,11-23H2,1H3,(H,25,26)/b10-9-	GWHCXVQVJPWHRF-KTKRTIGZSA-N	OC(CCCCCCCCCCCCC/C=C\CCCCCCCC)=O
C25:1	pentacosenoic acid		C25H48O2
C26:1	hexacosenoic acid	CHEBI:78865	C26H50O2
C27:1	heptacosenoic acid		C27H52O2
C28:1	octacosenoic Acid		C28H54O2
C29:1	nonacosenoic acid		C29H56O2
C18:3	octadecatrienoic acid	CHEBI:25633	C18H30O2
C18:2	linoleic acid	CHEBI:17351	C18H32O2	InChI=1S/C18H32O2/c1-2-3-4-5-6-7-8-9-10-11-12-13-14-15-16-17-18(19)20/h6-7,9-10H,2-5,8,11-17H2,1H3,(H,19,20)/b7-6-,10-9-	OYHQOLUKZRVURQ-HZJYTTRNSA-N	CCCCC\C=C/C\C=C/CCCCCCCC(O)=O
C20:5	eicosapentaenoic acid	CHEBI:28364	C20H30O2	InChI=1S/C20H30O2/c1-2-3-4-5-6-7-8-9-10-11-12-13-14-15-16-17-18-19-20(21)22/h3-4,6-7,9-10,12-13,15-16H,2,5,8,11,14,17-19H2,1H3,(H,21,22)/b4-3-,7-6-,10-9-,13-12-,16-15-	JAZBEHYOTPTENJ-JLNKQSITSA-N	CC\C=C/C\C=C/C\C=C/C\C=C/C\C=C/CCCC(O)=O
C20:4	icosatetraenoic acid	CHEBI:36033	C20H32O2
C20:3	icosatrienoic acid	CHEBI:36036	C20H34O2
C22:6	docosahexaenoic acid	CHEBI:28125	C22H32O2	InChI=1S/C22H32O2/c1-2-3-4-5-6-7-8-9-10-11-12-13-14-15-16-17-18-19-20-21-22(23)24/h3-4,6-7,9-10,12-13,15-16,18-19H,2,5,8,11,14,17,20-21H2,1H3,(H,23,24)/b4-3-,7-6-,10-9-,13-12-,16-15-,19-18-	MBMBGCFOFBJSGT-KUBAVDMBSA-N	CC\C=C/C\C=C/C\C=C/C\C=C/C\C=C/C\C=C/CCC(O)=O
C22:5	docosapentaenoic acid	CHEBI:61204	C22H34O2
C22:4	adrenic acid	CHEBI:53487	C22H36O2	InChI=1S/C22H36O2/c1-2-3-4-5-6-7-8-9-10-11-12-13-14-15-16-17-18-19-20-21-22(23)24/h6-7,9-10,12-13,15-16H,2-5,8,11,14,17-21H2,1H3,(H,23,24)/b7-6-,10-9-,13-12-,16-15-	TWSWSIQAPQLDBP-DOFZRALJSA-N	CCCCC\C=C/C\C=C/C\C=C/C\C=C/CCCCCC(O)=O
C24:6	nisinic acid	CHEBI:77366	C24H36O2	InChI=1S/C24H36O2/c1-2-3-4-5-6-7-8-9-10-11-12-13-14-15-16-17-18-19-20-21-22-23-24(25)26/h3-4,6-7,9-10,12-13,15-16,18-19H,2,5,8,11,14,17,20-23H2,1H3,(H,25,26)/b4-3-,7-6-,10-9-,13-12-,16-15-,19-18-	YHGJECVSSKXFCJ-KUBAVDMBSA-N	CC\C=C/C\C=C/C\C=C/C\C=C/C\C=C/C\C=C/CCCCC(O)=O
C24:5	tetracosapentaenoic acid	CHEBI:78862	C24H38O2
C24:4	tetracosatetraenoic acid	CHEBI:77526	C24H40O2	InChI=1S/C24H40O2/c1-2-3-4-5-6-7-8-9-10-11-12-13-14-15-16-17-18-19-20-21-22-23-24(25)26/h6-7,9-10,12-13,15-16H,2-5,8,11,14,17-23H2,1H3,(H,25,26)/b7-6-,10-9-,13-12-,16-15-	MMJZTSLHOIGZPU-DOFZRALJSA-N	CCCCC\C=C/C\C=C/C\C=C/C\C=C/CCCCCCCC(O)=O
