# Supplementary material for: Natural genetic variation in C. elegans identified genomic loci controlling metabolite levels
Source: Genome Res. 2018 Sep;28(9):1296–308. doi: 10.1101/gr.232322.117 (PMC6120624; doi:10.1101/gr.232322.117)
Supplement: Supplemental Material [file supp_gr.232322.117_Supplemental_Table_S3.xlsx]

## Sheet: Sheet 1
Supplemental Table S3:
The outcome of the transgression analysis.
Per trait it is indicated how many RILs fell beyond the mean ± pooled standard deviation of the parental strains N2 and CB4856 (n_strains_transgression).
The FDR0.1, FDR0.05, and FDR0.01 give the number of strains that constitute the significance boundary as determined by permutation at a false discovery rate of 0.1, 0.05, and 0.01 respectively.
trait	n_strains_transgression	FDR0.1	FDR0.05	FDR0.01	significant
Ala	24	100	131	162	No
Arg	113	136	152	178	No
Asn	55	117	149	174	No
Asp	25	133	150	169	No
C14:0	41	64	82	126	No
C14:1	5	53	71	117	No
C15:0	57	75	96	134	No
C15:1	119	130	144	168	No
C16:0	76	71	97	128	No
C16:1	30	91	119	146	No
C17:0	115	44	66	99	Yes
C17:1	19	77	103	143	No
C18:0	17	100	117	148	No
C18:1	5	94	114	140	No
C18:2	95	77	98	132	No
C18:3	148	65	89	136	Yes
C19:0	80	94	112	149	No
C19:1	4	66	87	119	No
C20:0	144	84	113	143	Yes
C20:1	116	92	115	141	Yes
C20:3	146	72	94	134	Yes
C20:4	117	69	99	143	Yes
C20:5	141	60	88	128	Yes
C21:0	114	78	107	150	Yes
C21:1	178	94	111	141	Yes
C22:0	135	85	112	154	Yes
C22:1	172	166	172	183	No
C22:4
C22:5
C22:6	189	142	158	183	Yes
C23:0	144	87	113	150	Yes
C23:1	105	94	116	150	No
C24:0	162	104	123	155	Yes
C24:1	137	130	146	166	No
C24:4	23	58	82	115	No
C24:5	154	112	134	158	Yes
C24:6	131	111	127	151	Yes
C25:0	137	86	116	155	Yes
C25:1	112	107	119	129	No
C26:0	55	79	105	144	No
C26:1	104	92	104	117	No
C27:0	182	147	163	183	Yes
C27:1
C28:0
C28:1
C29:0
C29:1
C30:0
Cit
Gln	9	99	131	167	No
Glu	108	126	145	168	No
Gly	87	99	129	166	No
Ile	66	124	145	174	No
Leu	18	93	128	163	No
Lys	97	93	124	159	No
Met	101	87	117	156	No
Orn	154	121	142	179	Yes
Phe	30	101	125	163	No
Pro	145	129	150	179	No
Ser	116	107	133	168	No
Trp	108	133	152	173	No
Tyr	29	85	120	162	No
Val	23	108	140	169	No
