# Supplementary material for: Natural genetic variation in C. elegans identified genomic loci controlling metabolite levels
Source: Genome Res. 2018 Sep;28(9):1296–308. doi: 10.1101/gr.232322.117 (PMC6120624; doi:10.1101/gr.232322.117)
Supplement: Supplemental Material [file supp_gr.232322.117_Supplemental_Table_S4.xlsx]

## Sheet: Sheet 1
Supplemental Table S4:
The outcome of the heritability analysis.
For both the parental strains N2 and CB4856 (H2_ANOVA_PL) and the RIL population (H2_ANOVA) the heritability is given per metabolite.
The individual components Vg (genetic variance) and Ve (environmental variance) are also given, as is the false discovery rate threshold of 0.05 (FDR0.05) for both populations.
The significance column indicates which populations displayed significant heritability.
trait	H2_ANOVA_PL	Vg_PL	Ve_PL	FDR0.05_ANOVA_PL	H2_ANOVA	Vg	Ve	FDR0.05_ANOVA	significance	Data_type	metabolite_fullname
Ala	0.007	0.063	9.009	0.179	0.355	45.324	82.441	0.312	H2_ANOVA	AA	Alanine
Arg	0.018	0.059	3.22	0.205	0.609	199.603	128.004	0.31	H2_ANOVA	AA	Arginine
Asn	0	0.001	7.235	0.175	0.492	41.278	42.697	0.311	H2_ANOVA	AA	Asparagine
Asp	0.195	1.253	5.183	0.194	0.598	200.636	134.693	0.313	H2_ANOVA_PL + H2_ANOVA	AA	Aspartic acid
C14:0	0.084	1.029	11.241	0.111	0.615	121.657	76.091	0.315	H2_ANOVA	Fat	C14:0
C14:1	0.479	13.076	14.243	0.097	0.824	167.368	35.824	0.315	H2_ANOVA_PL + H2_ANOVA	Fat	C14:1
C15:0	0.449	5.622	6.912	0.108	0.68	139.543	65.519	0.312	H2_ANOVA_PL + H2_ANOVA	Fat	C15:0
C15:1	0.274	0.93	2.47	0.107	0.278	63.276	164.489	0.296	H2_ANOVA_PL	Fat	C15:1
C16:0	0.042	0.431	9.774	0.12	0.541	90.223	76.685	0.308	H2_ANOVA	Fat	C16:0
C16:1	0.091	1.027	10.29	0.104	0.628	216.59	128.552	0.311	H2_ANOVA	Fat	C16:1
C17:0	0.195	1.588	6.555	0.093	0.759	138.078	43.821	0.311	H2_ANOVA_PL + H2_ANOVA	Fat	C17:0
C17:1	0.301	5.415	12.581	0.108	0.639	139.235	78.799	0.314	H2_ANOVA_PL + H2_ANOVA	Fat	C17:1
C18:0	0.095	1.626	15.558	0.099	0.506	59.386	58.013	0.318	H2_ANOVA	Fat	C18:0
C18:1	0.188	3.712	16.041	0.106	0.513	70.037	66.415	0.313	H2_ANOVA_PL + H2_ANOVA	Fat	C18:1
C18:2	0.068	0.678	9.27	0.111	0.652	99.715	53.194	0.314	H2_ANOVA	Fat	C18:2
C18:3	0.09	0.404	4.111	0.098	0.551	92.853	75.635	0.315	H2_ANOVA	Fat	C18:3
C19:0	0.125	1.122	7.836	0.108	0.747	119.428	40.464	0.31	H2_ANOVA_PL + H2_ANOVA	Fat	C19:0
C19:1	0.28	6.194	15.915	0.111	0.634	123.757	71.319	0.315	H2_ANOVA_PL + H2_ANOVA	Fat	C19:1
C20:0	0.002	0.011	6.795	0.096	0.491	41.159	42.725	0.315	H2_ANOVA	Fat	C20:0
C20:1	0.185	1.055	4.662	0.097	0.623	120.724	73.139	0.313	H2_ANOVA_PL + H2_ANOVA	Fat	C20:1
C20:3	0.004	0.023	5.687	0.106	0.671	88.275	43.319	0.318	H2_ANOVA	Fat	C20:3
C20:4	0.111	0.585	4.673	0.114	0.646	130.029	71.1	0.314	H2_ANOVA	Fat	C20:4
C20:5	0.054	0.274	4.824	0.102	0.525	91.419	82.638	0.309	H2_ANOVA	Fat	C20:5
C21:0	0.005	0.042	8.803	0.104	0.642	78.228	43.544	0.307	H2_ANOVA	Fat	C21:0
C21:1	0	0.001	3.679	0.105	0.55	118.643	97.259	0.311	H2_ANOVA	Fat	C21:1
C22:0	0.095	0.549	5.205	0.1	0.441	35.01	44.444	0.315	H2_ANOVA	Fat	C22:0
C22:1	0.017	0.031	1.827	0.108	0.322	23	48.326	0.3	H2_ANOVA	Fat	C22:1
C22:6	0.001	0.002	1.336	0.114	0.191	6.175	26.233	0.312	Not significant	Fat	C22:6
C23:0	0.029	0.153	5.14	0.089	0.623	67.986	41.12	0.316	H2_ANOVA	Fat	C23:0
C23:1	0.149	0.797	4.535	0.106	0.601	137.258	91.052	0.312	H2_ANOVA_PL + H2_ANOVA	Fat	C23:1
C24:0	0.019	0.059	3.011	0.089	0.323	23.02	48.318	0.301	H2_ANOVA	Fat	C24:0
C24:1	0.035	0.141	3.899	0.103	0.526	85.492	77.051	0.311	H2_ANOVA	Fat	C24:1
C24:4	0.006	0.09	16.13	0.096	0.496	107.694	109.314	0.31	H2_ANOVA	Fat	C24:4
C24:5	0.003	0.017	5.223	0.103	0.345	23.753	45.19	0.314	H2_ANOVA	Fat	C24:5
C24:6	0.006	0.034	5.654	0.093	0.37	34.31	58.439	0.309	H2_ANOVA	Fat	C24:6
C25:0	0.221	0.785	2.772	0.105	0.573	56.496	42.064	0.309	H2_ANOVA_PL + H2_ANOVA	Fat	C25:0
C25:1	0.014	0.041	2.862	0.112	0.377	53.889	88.938	0.342	H2_ANOVA	Fat	C25:1
C26:0	0.228	2.509	8.494	0.101	0.609	132.865	85.213	0.32	H2_ANOVA_PL + H2_ANOVA	Fat	C26:0
C27:0	0.008	0.016	1.957	0.099	0.438	20.308	26.092	0.305	H2_ANOVA	Fat	C27:0
Gln	0.052	0.64	11.558	0.189	0.51	88.006	84.526	0.313	H2_ANOVA	AA	Glutamine
Glu	0.011	0.054	4.774	0.193	0.594	161.967	110.688	0.309	H2_ANOVA	AA	Glutamic acid
Gly	0.002	0.007	4.337	0.183	0.382	120.355	194.36	0.31	H2_ANOVA	AA	Glycine
Ile	0.002	0.012	5.431	0.142	0.645	215.855	118.966	0.319	H2_ANOVA	AA	Isoleucine
Leu	0.053	0.481	8.536	0.118	0.58	132.191	95.661	0.318	H2_ANOVA	AA	Leucine
Lys	0.002	0.017	7.599	0.184	0.688	174.016	78.861	0.309	H2_ANOVA	AA	Lysine
Met	0	0.001	5.7	0.147	0.534	99.43	86.753	0.307	H2_ANOVA	AA	Methionine
Orn	0.144	0.169	1.003	0.201	0.558	102.546	81.294	0.317	H2_ANOVA	AA	Ornithine
Phe	0.13	1.162	7.747	0.178	0.562	76.434	59.591	0.312	H2_ANOVA	AA	Phenylalanine
Pro	0	0	4.779	0.173	0.424	40.427	54.895	0.316	H2_ANOVA	AA	Proline
Ser	0	0	5.34	0.184	0.601	96.686	64.064	0.311	H2_ANOVA	AA	Serine
Trp	0.052	0.264	4.793	0.168	0.321	39.281	82.947	0.309	H2_ANOVA	AA	Tryptophan
Tyr	0.18	1.498	6.83	0.145	0.574	114.606	84.942	0.311	H2_ANOVA_PL + H2_ANOVA	AA	Tyrosine
Val	0.007	0.054	7.135	0.169	0.573	158.661	118.329	0.316	H2_ANOVA	AA	Valine
