# Supplementary material for: Natural genetic variation in C. elegans identified genomic loci controlling metabolite levels
Source: Genome Res. 2018 Sep;28(9):1296–308. doi: 10.1101/gr.232322.117 (PMC6120624; doi:10.1101/gr.232322.117)
Supplement: Supplemental Material [file supp_gr.232322.117_Supplemental_Table_S5.xlsx]

## Sheet: Sheet 1
Supplemental Table S5:
Analysis of the statistical power of the QTL mapping.
At each marker location 10 peaks were simulated that explained 5-80% of the variation (in 5% increments).
For each simulated peak, it was determined if the QTL was detected at the right location.
Additionally, the ratio of the estimated effect size versus the simulated effect size is given for the simulations (in quantiles), as is the precision of the QTL location (in quantiles).
Simulation			QTL detection					Effect size estimation (quantiles)					QTL-true peak location distance (quantiles)
type	sigma	fraction_var_explained	detected_true	detected_false	detected_not	fraction_detected	fraction_false	quantile0	quantile25	quantile50	quantile75	quantile100	quantile0	quantile25	quantile50	quantile75	quantile100
peak	0.46	0.05	2399	270	4621	0.329	0.037	1.03913	1.25217	1.35217	1.49565	2.16087	0	50000	320000	975000	12210000
peak	0.67	0.1	5856	218	1216	0.803	0.03	0.653731	0.964179	1.07463	1.20299	1.95821	0	20000	230000	670000	11852423
peak	0.84	0.15	6954	150	186	0.954	0.021	0.569048	0.911905	1.01905	1.13571	1.88095	0	10000	150000	470000	9790000
peak	1	0.2	7143	114	33	0.98	0.016	0.556	0.916	1.012	1.11	1.56	0	10000	110000	390000	9180000
peak	1.15	0.25	7161	121	8	0.982	0.017	0.54087	0.925217	1.0087	1.09565	1.52522	0	10000	80000	310000	7060000
peak	1.3	0.3	7204	86	0	0.988	0.012	0.587692	0.933846	1.00923	1.08462	1.40923	0	0	70000	280000	5470000
peak	1.47	0.35	7196	94	0	0.987	0.013	0.647619	0.937415	1.00408	1.07211	1.39864	0	0	50000	240000	4910000
peak	1.64	0.4	7203	87	0	0.988	0.012	0.676829	0.942683	1.00244	1.06463	1.33902	0	0	40000	210000	5110000
peak	1.82	0.45	7197	93	0	0.987	0.013	0.652747	0.947253	1.0022	1.05385	1.32747	0	0	20000	200000	4180000
peak	2	0.5	7221	69	0	0.991	0.009	0.713	0.953	1.002	1.049	1.354	0	0	20000	190000	3700000
peak	2.2	0.55	7219	71	0	0.99	0.01	0.76	0.957273	1.00182	1.04818	1.27273	0	0	10000	170000	3860000
peak	2.47	0.6	7215	75	0	0.99	0.01	0.782186	0.961134	1.00324	1.04211	1.24534	0	0	10000	160000	3420000
peak	2.73	0.65	7228	62	0	0.991	0.009	0.774359	0.964835	1.00073	1.03736	1.21319	0	0	10000	150000	3260000
peak	3.05	0.7	7230	60	0	0.992	0.008	0.80459	0.968525	1.00066	1.03344	1.24	0	0	10000	140000	3570000
peak	3.45	0.75	7242	48	0	0.993	0.007	0.806957	0.971014	1	1.02899	1.18029	0	0	10000	137500	3100000
peak	4	0.8	7270	20	0	0.997	0.003	0.8455	0.975	1	1.0245	1.136	0	0	10000	130000	3410000
noise	1	0	0	1418	78772	0	0.018	NA	NA	NA	NA	NA	NA	NA	NA	NA	NA
