# Supplementary material for: Natural genetic variation in C. elegans identified genomic loci controlling metabolite levels
Source: Genome Res. 2018 Sep;28(9):1296–308. doi: 10.1101/gr.232322.117 (PMC6120624; doi:10.1101/gr.232322.117)
Supplement: Supplemental Material [file supp_gr.232322.117_Supplemental_Table_S6.xlsx]

## Sheet: Sheet 1
Supplemental Table S6:
A summary table of the mQTL.
Per metabolite the mQTL are given, the significance of the mQTL in –log10(p), the effect of the mQTL (positive numbers indicate higher at N2 loci, negative numbers indicate higher at CB4856 loci), and the amount of variation the mQTL explains (according to a single marker model).
Also, the mQTL location is given: Chromosome (qtl_chromosome), peak location in base pairs (qtl_bp) and in marker location (qtl_marker_peak).
The confidence interval of the mQTL location, based on a 1.5 drop in –log10(p), is given (the left and right locations).
Finally, the estimated heritabilities are included per metabolite.
metabolite	metabolite_fullname	measurement	transformation	qtl_significance	qtl_effect	qtl_R2_sm	qtl_chromosome	qtl_bp	qtl_marker_peak	qtl_bp_left	qtl_marker_left	qtl_bp_right	qtl_marker_right	H2_ANOVA_PL	H2_ANOVA
Ala	Alanine	Amino acid	Perc.zscore	4.92	0.588	0.0927196	V	11800019	534	6570017	515	13610012	541	0.007	0.355
C14:0	C14:0	Fatty acid	Perc.zscore	3.71	0.479	0.0677248	III	600003	234	10000	233	600003	233	0.084	0.615
C14:1	C14:1	Fatty acid	Perc.zscore	18.84	-1.111	0.342138	I	13860012	116	12190009	108	14660011	119	0.479	0.824
C15:0	C15:0	Fatty acid	Perc.zscore	6.15	-0.619	0.117271	III	600003	234	10000	233	600003	233	0.449	0.68
C15:1	C15:1	Fatty acid	Perc.zscore	5.21	-0.552	0.0992247	I	13860012	116	12190009	108	15072434	125	0.274	0.278
C17:0	C17:0	Fatty acid	Perc.zscore	5.46	-0.702	0.104411	III	600003	234	10000	233	600003	233	0.195	0.759
C17:1	C17:1	Fatty acid	Perc.zscore	4.39	0.545	0.0824473	IV	2730002	398	2630002	396	8820013	421	0.301	0.639
C18:1	C18:1	Fatty acid	Perc.zscore	3.77	0.485	0.0697147	I	6019998	74	3649997	72	10510011	91	0.188	0.513
C18:2	C18:2	Fatty acid	Perc.zscore	5.15	-0.573	0.0979992	II	12230064	190	12120064	186	13350070	213	0.068	0.652
C18:2	C18:2	Fatty acid	Perc.zscore	8.76	0.763	0.169683	IV	4610008	414	4360007	412	6440011	417	0.068	0.652
C19:0	C19:0	Fatty acid	Perc.zscore	5.39	-0.63	0.10347	IV	4610008	414	2210000	379	13290024	451	0.125	0.747
C20:1	C20:1	Fatty acid	Perc.zscore	5.97	0.501	0.114569	II	12230064	190	12120064	186	12970069	200	0.185	0.623
C20:1	C20:1	Fatty acid	Perc.zscore	4.86	-0.457	0.0927329	IV	7930012	420	2630002	396	13180024	450	0.185	0.623
C20:3	C20:3	Fatty acid	Perc.zscore	6.13	-0.686	0.118052	IV	3810005	406	3480003	404	9710017	427	0.004	0.671
C23:1	C23:1	Fatty acid	Perc.zscore	3.74	-0.397	0.0695031	I	6259998	75	3649997	72	11980009	106	0.149	0.601
C23:1	C23:1	Fatty acid	Perc.zscore	3.71	-0.375	0.0693016	IV	9070015	423	2210000	379	13330024	454	0.149	0.601
C24:1	C24:1	Fatty acid	Perc.zscore	3.87	-0.322	0.0717582	I	10510011	91	6019998	74	11980009	106	0.035	0.526
C24:5	C24:5	Fatty acid	Perc.zscore	4.28	-0.535	0.0814106	I	10510011	91	6019998	74	11570009	102	0.003	0.345
C24:6	C24:6	Fatty acid	Perc.zscore	4.52	-0.476	0.0852364	I	10510011	91	6019998	74	11980009	106	0.006	0.37
C25:0	C25:0	Fatty acid	Perc.zscore	3.81	0.513	0.0707792	III	10060091	298	4300027	279	11180099	302	0.221	0.573
C25:1	C25:1	Fatty acid	Perc.zscore	3.87	-0.403	0.100127	IV	8820013	421	2630002	396	10830020	436	0.014	0.377
C26:0	C26:0	Fatty acid	Perc.zscore	3.72	-0.496	0.0700505	I	14690011	122	13880012	118	15072434	125	0.228	0.609
Gln	Glutamine	Amino acid	Perc.zscore	4.3	-0.498	0.0805004	V	11360018	530	7180019	517	14640015	545	0.052	0.51
Gln	Glutamine	Amino acid	Perc.zscore	5.25	0.569	0.0992708	X	4890030	641	3030010	633	6890040	650	0.052	0.51
Leu	Leucine	Amino acid	Perc.zscore	3.95	0.475	0.0731823	I	10510011	91	3649997	72	13850012	115	0.053	0.58
Leu	Leucine	Amino acid	Perc.zscore	4.9	0.513	0.0915313	IV	12510023	445	4360007	412	14640028	459	0.053	0.58
Lys	Lysine	Amino acid	Perc.zscore	4.03	-0.436	0.0746346	IV	2410001	385	1150000	350	2720002	397	0.002	0.688
Met	Methionine	Amino acid	Perc.zscore	4.15	0.533	0.0772032	I	10510011	91	6019998	74	12410010	109	0	0.534
Met	Methionine	Amino acid	Perc.zscore	3.78	0.485	0.0683518	IV	12510023	445	4360007	412	14770032	460	0	0.534
Met	Methionine	Amino acid	Perc.zscore	3.75	-0.487	0.0676793	X	6350036	648	3030010	633	6900040	651	0	0.534
Orn	Ornithine	Amino acid	Perc.zscore	5.68	0.621	0.108692	III	9010077	295	4310027	280	10950099	300	0.144	0.558
Orn	Ornithine	Amino acid	Perc.zscore	5.09	-0.591	0.096845	X	2570007	627	10000	601	3820019	634	0.144	0.558
Phe	Phenylalanine	Amino acid	Perc.zscore	4.02	0.558	0.0745301	I	11560009	101	3649997	72	14660011	119	0.13	0.562
Phe	Phenylalanine	Amino acid	Perc.zscore	5.67	0.654	0.108161	IV	10240022	431	4360007	412	14630028	458	0.13	0.562
Tyr	Tyrosine	Amino acid	Perc.zscore	5.13	0.573	0.0971399	I	10510011	91	3649997	72	12410010	109	0.18	0.574
Tyr	Tyrosine	Amino acid	Perc.zscore	4.01	0.484	0.074503	IV	9710017	427	4030006	407	13520024	457	0.18	0.574
