# Supplementary material for: Natural genetic variation in C. elegans identified genomic loci controlling metabolite levels
Source: Genome Res. 2018 Sep;28(9):1296–308. doi: 10.1101/gr.232322.117 (PMC6120624; doi:10.1101/gr.232322.117)
Supplement: Supplemental Material [file supp_gr.232322.117_Supplemental_Table_S7.xlsx]

## Sheet: Description
Supplemental Table S7:
A summary table of the mQTL from the interaction model.
Per metabolite the significant interaction-mQTL are given (false discovery rate, FDR < 0.1).
The marker range where the interaction was most significant is indicated for each marker pair (e.g marker 720 to 722 for marker 1 for the second Alanine peak).
The significance of the loci (pval1 and pval2) and their interaction (pvali) are given in –log10(p).
The effects are also given: eff1 and eff2 for the loci and effi for the interaction effect.
The Chromosomes of the loci are given and the false discovery rate (FDR) of the interaction effect.

## Sheet: additive_mQTL
metabolite	model	markers	effect	significance	Rsquared
C18:2	additive	190	-0.244249	3.43577e-05	0.232002
C18:2	additive	414	0.352036	8.03308e-09	0.232002
C18:2	interaction	190	-0.259231	1.59356e-05	0.2351
C18:2	interaction	414	0.3426	2.18267e-08	0.2351
C18:2	interaction	190:414	-0.0785014	0.18252	0.2351
C20:1	additive	190	0.22794	4.12696e-06	0.178098
C20:1	additive	420	-0.202683	4.95247e-05	0.178098
C20:1	interaction	190	0.215907	1.74849e-05	0.180269
C20:1	interaction	420	-0.209879	3.01965e-05	0.180269
C20:1	interaction	190:420	-0.0604858	0.219641	0.180269
C23:1	additive	75	-0.178403	0.000561664	0.115786
C23:1	additive	423	-0.169013	0.000574441	0.115786
C23:1	interaction	75	-0.164241	0.00227594	0.115179
C23:1	interaction	423	-0.189714	0.000452539	0.115179
C23:1	interaction	75:423	0.0495008	0.352928	0.115179
Gln	additive	530	-0.229687	8.6649e-05	0.159036
Gln	additive	641	0.266392	1.03824e-05	0.159036
Gln	interaction	530	-0.228856	0.000143718	0.15474
Gln	interaction	641	0.266372	1.09549e-05	0.15474
Gln	interaction	530:641	-0.0036267	0.951055	0.15474
Leu	additive	91	0.222339	0.000159134	0.146822
Leu	additive	445	0.242597	2.01994e-05	0.146822
Leu	interaction	91	0.235826	9.25558e-05	0.147466
Leu	interaction	445	0.220715	0.000249125	0.147466
Leu	interaction	91:445	0.0633699	0.285267	0.147466
Met	additive	91	0.242711	0.000131353	0.172574
Met	additive	445	0.202877	0.000901183	0.172574
Met	additive	648	-0.205039	0.000870482	0.172574
Met	interaction	91	0.268697	6.25809e-05	0.187134
Met	interaction	445	0.154465	0.0197656	0.187134
Met	interaction	648	-0.245647	0.000244841	0.187134
Met	interaction	91:445	0.109672	0.0967724	0.187134
Met	interaction	91:648	0.0838267	0.203632	0.187134
Met	interaction	445:648	-0.0180394	0.783991	0.187134
Met	interaction	91:445:648	0.111019	0.0927774	0.187134
Orn	additive	295	0.288351	3.91498e-06	0.181832
Orn	additive	627	-0.271864	1.51037e-05	0.181832
Orn	interaction	295	0.293142	3.57138e-06	0.178905
Orn	interaction	627	-0.273437	1.43402e-05	0.178905
Orn	interaction	295:627	-0.0337183	0.58371	0.178905
Phe	additive	101	0.252366	0.000208552	0.160259
Phe	additive	431	0.30598	4.61831e-06	0.160259
Phe	interaction	101	0.262412	0.000192281	0.157449
Phe	interaction	431	0.292198	3.62829e-05	0.157449
Phe	interaction	101:431	0.0406759	0.556876	0.157449
Tyr	additive	91	0.269299	1.36767e-05	0.151271
Tyr	additive	427	0.222414	0.000175918	0.151271
Tyr	interaction	91	0.288036	6.16052e-06	0.154173
Tyr	interaction	427	0.194097	0.00202737	0.154173
Tyr	interaction	91:427	0.0802414	0.197442	0.154173

## Sheet: 2D_mQTL
metabolite	marker_1_range	marker_2_range	pval1	pval2	pvali	eff1	eff2	effi	chromosome_1	chromosome_2	pval_FDR
Ala	480:480	201:202	0.96	0.8	4.31	-0.10701	0.09378	0.27556	IV	II	0.0829967
Ala	720:722	227:231	0.17	0.21	4.1	0.02863	0.03459	-0.27411	X	II	0.0829967
Asp	511:511	141:147	2.71	1.29	4.36	-0.1353	0.08432	-0.18042	V	II	0.0778707
C15:1	573:577	514:515	1.1	0.72	5.65	-0.11335	-0.08457	-0.31386	V	V	0.0173932
C16:1	611:612	106:108	1.41	0.6	5.76	-0.10648	-0.05889	0.25247	X	I	0.00338521
C16:1	446:449	92:92	3.31	0.2	4.07	0.18775	-0.02574	-0.21273	IV	I	0.00911747
C16:1	637:637	194:199	1.25	0.24	4.06	-0.09686	-0.02801	-0.20193	X	II	0.00926344
C16:1	541:542	61:61	1.15	0.39	3.59	-0.1092	0.04974	0.22396	V	I	0.0172373
C16:1	673:673	554:555	2.08	0.47	2.99	-0.13138	0.047	-0.16448	X	V	0.0373418
C16:1	445:445	198:198	1.92	0.23	2.87	0.12806	-0.02747	0.16442	IV	II	0.0436558
C16:1	326:330	261:263	0.15	0.3	2.87	0.01855	0.03433	0.16498	III	III	0.0436558
C16:1	162:162	17:18	3.1	0.92	2.75	-0.20955	0.09588	0.19506	II	I	0.0486768
C16:1	686:691	233:236	1.48	0.24	2.3	-0.10721	0.0282	0.14215	X	III	0.0900352
C24:5	451:451	389:389	2.19	0.05	4.33	-0.17096	0.00862	0.25876	IV	IV	0.0985705
C24:5	141:147	106:108	0.04	2.07	3.74	0.00634	-0.16573	0.23792	II	I	0.0985705
Gln	723:723	368:369	1.25	1.02	5.41	0.11349	-0.09918	0.281	X	IV	0.0261889
Gln	451:451	118:118	2.19	0.34	3.24	-0.17174	-0.04583	0.21797	IV	I	0.0671798
