# Supplementary material for: Natural genetic variation in C. elegans identified genomic loci controlling metabolite levels
Source: Genome Res. 2018 Sep;28(9):1296–308. doi: 10.1101/gr.232322.117 (PMC6120624; doi:10.1101/gr.232322.117)
Supplement: Supplemental Material [file supp_gr.232322.117_Supplemental_Table_S8.xlsx]

## Sheet: Description
Supplemental Table S8:
In sheet 1 a list of the candidate genes as prioritized for the C14:1, C15:1 and C26:0 mQTL on Chromosome I can be found.
In sheet 2 all the genes identified by KEGG under these mQTL are listed.
In sheet 3 all genes identified at transcription factor under these mQTL are listed.
The polymorphisms used are those from the CB4856 reference genome (differences between N2 and CB4856).

## Sheet: Candidate_summary
qtl_peak	Source	genes_polymorf_highimpact	genes_polymorf_regulatory
C14:1;I:12190009-14660011	KEGG	acox-1.1, acox-1.2, acox-1.3, acox-1.4, hpo-13	acox-1.2, asah-1, ech-7
C15:1;I:12190009-15072434	KEGG	acox-1.1, acox-1.2, acox-1.3, acox-1.4, hpo-13, ttm-5	acox-1.2, asah-1, ech-7
C26:0;I:13880012-15072434	KEGG	hpo-13, ttm-5	ech-7
C14:1:I:12190009-14660011	Transcription_factor	nhr-81, nhr-174, nhr-82, nhr-265, nhr-217, nhr-77, nhr-85, Y37H9A.3	taf-1, nhr-85
C15:1:I:12190009-15072434	Transcription_factor	nhr-81, nhr-174, nhr-82, nhr-265, nhr-217, nhr-77, nhr-85, Y37H9A.3	taf-1, nhr-85
C26:0:I:13880012-15072434	Transcription_factor

## Sheet: All_KEGG
qtl_peak	metabolite_fullname	metabolite_abbreviation	metabolite_type	gene_sequence_name	metabolite	pathway	specifics	name	gene_public_name.x	gene_description	gene_public_name.y	gene_chromosome	gene_bp	gene_polymorf_highimpact	gene_polymorf_lowimpact	gene_polymorf_regulatory
C14:1;I:12190009-14660011	C14:1	C14:1	Fatty acid	F08A8.1	Fat	cel00071	C	Fatty acid degradation	acox-1.1	Acyl-coenzyme A oxidase [KO:K00232] [EC:1.3.3.6]	acox-1	I	12938544	1	0	0
C14:1;I:12190009-14660011	C14:1	C14:1	Fatty acid	F08A8.1	Fat	cel01040	C	Biosynthesis of unsaturated fatty acids	acox-1.1	Acyl-coenzyme A oxidase [KO:K00232] [EC:1.3.3.6]	acox-1	I	12938544	1	0	0
C14:1;I:12190009-14660011	C14:1	C14:1	Fatty acid	F08A8.1	Fat	cel00592	C	alpha-Linolenic acid metabolism	acox-1.1	Acyl-coenzyme A oxidase [KO:K00232] [EC:1.3.3.6]	acox-1	I	12938544	1	0	0
C14:1;I:12190009-14660011	C14:1	C14:1	Fatty acid	F08A8.2	Fat	cel00071	C	Fatty acid degradation	acox-1.2	Acyl-coenzyme A oxidase [KO:K00232] [EC:1.3.3.6]	F08A8.2	I	12942269	1	4	1
C14:1;I:12190009-14660011	C14:1	C14:1	Fatty acid	F08A8.2	Fat	cel01040	C	Biosynthesis of unsaturated fatty acids	acox-1.2	Acyl-coenzyme A oxidase [KO:K00232] [EC:1.3.3.6]	F08A8.2	I	12942269	1	4	1
C14:1;I:12190009-14660011	C14:1	C14:1	Fatty acid	F08A8.2	Fat	cel00592	C	alpha-Linolenic acid metabolism	acox-1.2	Acyl-coenzyme A oxidase [KO:K00232] [EC:1.3.3.6]	F08A8.2	I	12942269	1	4	1
C14:1;I:12190009-14660011	C14:1	C14:1	Fatty acid	F08A8.3	Fat	cel00071	C	Fatty acid degradation	acox-1.3	Acyl-coenzyme A oxidase [KO:K00232] [EC:1.3.3.6]	F08A8.3	I	12946936	1	1	0
C14:1;I:12190009-14660011	C14:1	C14:1	Fatty acid	F08A8.3	Fat	cel00592	C	alpha-Linolenic acid metabolism	acox-1.3	Acyl-coenzyme A oxidase [KO:K00232] [EC:1.3.3.6]	F08A8.3	I	12946936	1	1	0
C14:1;I:12190009-14660011	C14:1	C14:1	Fatty acid	F08A8.3	Fat	cel01040	C	Biosynthesis of unsaturated fatty acids	acox-1.3	Acyl-coenzyme A oxidase [KO:K00232] [EC:1.3.3.6]	F08A8.3	I	12946936	1	1	0
C14:1;I:12190009-14660011	C14:1	C14:1	Fatty acid	F08A8.4	Fat	cel00592	C	alpha-Linolenic acid metabolism	acox-1.4	Acyl-coenzyme A oxidase [KO:K00232] [EC:1.3.3.6]	F08A8.4	I	12951014	1	1	0
C14:1;I:12190009-14660011	C14:1	C14:1	Fatty acid	F08A8.4	Fat	cel01040	C	Biosynthesis of unsaturated fatty acids	acox-1.4	Acyl-coenzyme A oxidase [KO:K00232] [EC:1.3.3.6]	F08A8.4	I	12951014	1	1	0
C14:1;I:12190009-14660011	C14:1	C14:1	Fatty acid	F08A8.4	Fat	cel00071	C	Fatty acid degradation	acox-1.4	Acyl-coenzyme A oxidase [KO:K00232] [EC:1.3.3.6]	F08A8.4	I	12951014	1	1	0
C14:1;I:12190009-14660011	C14:1	C14:1	Fatty acid	F47G4.3	Fat	cel00564	C	Glycerophospholipid metabolism	gpdh-1	Glycerol-3-phosphate dehydrogenase [NAD(+)] [KO:K00006] [EC:1.1.1.8]	gpdh-1	I	14075824	0	0	0
C14:1;I:12190009-14660011	C14:1	C14:1	Fatty acid	K11D2.2	Fat	cel00600	C	Sphingolipid metabolism	asah-1	Acid ceramidase [KO:K12348] [EC:3.5.1.23]	asah-1	I	12505088	0	1	1
C14:1;I:12190009-14660011	C14:1	C14:1	Fatty acid	T27F6.6	Fat	cel00600	C	Sphingolipid metabolism	T27F6.6	Putative neutral sphingomyelinase [KO:K12351] [EC:3.1.4.12]	T27F6.6	I	12490964	0	0	0
C14:1;I:12190009-14660011	C14:1	C14:1	Fatty acid	Y105E8A.10	Fat	cel00600	C	Sphingolipid metabolism	hpo-13	Non-lysosomal glucosylceramidase [KO:K17108] [EC:3.2.1.45]	hpo-13	I	14418185	1	0	0
C14:1;I:12190009-14660011	C14:1	C14:1	Fatty acid	Y105E8A.4	Fat	cel00071	C	Fatty acid degradation	ech-7	Enoyl-CoA Hydratase [KO:K07511] [EC:4.2.1.17]	ech-7	I	14367566	0	0	3
C14:1;I:12190009-14660011	C14:1	C14:1	Fatty acid	Y105E8A.4	Fat	cel00062	C	Fatty acid elongation	ech-7	Enoyl-CoA Hydratase [KO:K07511] [EC:4.2.1.17]	ech-7	I	14367566	0	0	3
C14:1;I:12190009-14660011	C14:1	C14:1	Fatty acid	Y6B3B.10	Fat	cel00600	C	Sphingolipid metabolism	lagr-1	Probable ceramide synthase lagr-1 [KO:K04710] [EC:2.3.1.24]	lagr-1	I	13724563	0	1	0
C14:1;I:12190009-14660011	C14:1	C14:1	Fatty acid	Y87G2A.2	Fat	PATH:cel00120	C		Y87G2A.2	Zhang et al, 2013; acyl-CoA thioesterase	Y87G2A.2	I	13534734	0	0	0
C14:1;I:12190009-14660011	C14:1	C14:1	Fatty acid	ZK1053.5	Fat		C		scrm-2	Zhang et al, 2013; scramblase	scrm-2	I	13235356	0	1	0
C15:1;I:12190009-15072434	C15:1	C15:1	Fatty acid	F08A8.1	Fat	cel00071	C	Fatty acid degradation	acox-1.1	Acyl-coenzyme A oxidase [KO:K00232] [EC:1.3.3.6]	acox-1	I	12938544	1	0	0
C15:1;I:12190009-15072434	C15:1	C15:1	Fatty acid	F08A8.1	Fat	cel01040	C	Biosynthesis of unsaturated fatty acids	acox-1.1	Acyl-coenzyme A oxidase [KO:K00232] [EC:1.3.3.6]	acox-1	I	12938544	1	0	0
C15:1;I:12190009-15072434	C15:1	C15:1	Fatty acid	F08A8.1	Fat	cel00592	C	alpha-Linolenic acid metabolism	acox-1.1	Acyl-coenzyme A oxidase [KO:K00232] [EC:1.3.3.6]	acox-1	I	12938544	1	0	0
C15:1;I:12190009-15072434	C15:1	C15:1	Fatty acid	F08A8.2	Fat	cel00071	C	Fatty acid degradation	acox-1.2	Acyl-coenzyme A oxidase [KO:K00232] [EC:1.3.3.6]	F08A8.2	I	12942269	1	4	1
C15:1;I:12190009-15072434	C15:1	C15:1	Fatty acid	F08A8.2	Fat	cel01040	C	Biosynthesis of unsaturated fatty acids	acox-1.2	Acyl-coenzyme A oxidase [KO:K00232] [EC:1.3.3.6]	F08A8.2	I	12942269	1	4	1
C15:1;I:12190009-15072434	C15:1	C15:1	Fatty acid	F08A8.2	Fat	cel00592	C	alpha-Linolenic acid metabolism	acox-1.2	Acyl-coenzyme A oxidase [KO:K00232] [EC:1.3.3.6]	F08A8.2	I	12942269	1	4	1
C15:1;I:12190009-15072434	C15:1	C15:1	Fatty acid	F08A8.3	Fat	cel00071	C	Fatty acid degradation	acox-1.3	Acyl-coenzyme A oxidase [KO:K00232] [EC:1.3.3.6]	F08A8.3	I	12946936	1	1	0
C15:1;I:12190009-15072434	C15:1	C15:1	Fatty acid	F08A8.3	Fat	cel00592	C	alpha-Linolenic acid metabolism	acox-1.3	Acyl-coenzyme A oxidase [KO:K00232] [EC:1.3.3.6]	F08A8.3	I	12946936	1	1	0
C15:1;I:12190009-15072434	C15:1	C15:1	Fatty acid	F08A8.3	Fat	cel01040	C	Biosynthesis of unsaturated fatty acids	acox-1.3	Acyl-coenzyme A oxidase [KO:K00232] [EC:1.3.3.6]	F08A8.3	I	12946936	1	1	0
C15:1;I:12190009-15072434	C15:1	C15:1	Fatty acid	F08A8.4	Fat	cel00592	C	alpha-Linolenic acid metabolism	acox-1.4	Acyl-coenzyme A oxidase [KO:K00232] [EC:1.3.3.6]	F08A8.4	I	12951014	1	1	0
C15:1;I:12190009-15072434	C15:1	C15:1	Fatty acid	F08A8.4	Fat	cel01040	C	Biosynthesis of unsaturated fatty acids	acox-1.4	Acyl-coenzyme A oxidase [KO:K00232] [EC:1.3.3.6]	F08A8.4	I	12951014	1	1	0
C15:1;I:12190009-15072434	C15:1	C15:1	Fatty acid	F08A8.4	Fat	cel00071	C	Fatty acid degradation	acox-1.4	Acyl-coenzyme A oxidase [KO:K00232] [EC:1.3.3.6]	F08A8.4	I	12951014	1	1	0
C15:1;I:12190009-15072434	C15:1	C15:1	Fatty acid	F47G4.3	Fat	cel00564	C	Glycerophospholipid metabolism	gpdh-1	Glycerol-3-phosphate dehydrogenase [NAD(+)] [KO:K00006] [EC:1.1.1.8]	gpdh-1	I	14075824	0	0	0
C15:1;I:12190009-15072434	C15:1	C15:1	Fatty acid	K11D2.2	Fat	cel00600	C	Sphingolipid metabolism	asah-1	Acid ceramidase [KO:K12348] [EC:3.5.1.23]	asah-1	I	12505088	0	1	1
C15:1;I:12190009-15072434	C15:1	C15:1	Fatty acid	T27F6.6	Fat	cel00600	C	Sphingolipid metabolism	T27F6.6	Putative neutral sphingomyelinase [KO:K12351] [EC:3.1.4.12]	T27F6.6	I	12490964	0	0	0
C15:1;I:12190009-15072434	C15:1	C15:1	Fatty acid	Y105E8A.10	Fat	cel00600	C	Sphingolipid metabolism	hpo-13	Non-lysosomal glucosylceramidase [KO:K17108] [EC:3.2.1.45]	hpo-13	I	14418185	1	0	0
C15:1;I:12190009-15072434	C15:1	C15:1	Fatty acid	Y105E8A.4	Fat	cel00071	C	Fatty acid degradation	ech-7	Enoyl-CoA Hydratase [KO:K07511] [EC:4.2.1.17]	ech-7	I	14367566	0	0	3
C15:1;I:12190009-15072434	C15:1	C15:1	Fatty acid	Y105E8A.4	Fat	cel00062	C	Fatty acid elongation	ech-7	Enoyl-CoA Hydratase [KO:K07511] [EC:4.2.1.17]	ech-7	I	14367566	0	0	3
C15:1;I:12190009-15072434	C15:1	C15:1	Fatty acid	Y54E5A.1	Fat	cel00600	C	Sphingolipid metabolism	ttm-5	Putative sphingolipid delta(4)-desaturase/C4-monooxygenase [KO:K04712] [EC:1.14.18.5 1.14.19.17]	ttm-5	I	14688661	1	1	0
C15:1;I:12190009-15072434	C15:1	C15:1	Fatty acid	Y6B3B.10	Fat	cel00600	C	Sphingolipid metabolism	lagr-1	Probable ceramide synthase lagr-1 [KO:K04710] [EC:2.3.1.24]	lagr-1	I	13724563	0	1	0
C15:1;I:12190009-15072434	C15:1	C15:1	Fatty acid	Y87G2A.2	Fat	PATH:cel00120	C		Y87G2A.2	Zhang et al, 2013; acyl-CoA thioesterase	Y87G2A.2	I	13534734	0	0	0
C15:1;I:12190009-15072434	C15:1	C15:1	Fatty acid	ZK1053.5	Fat		C		scrm-2	Zhang et al, 2013; scramblase	scrm-2	I	13235356	0	1	0
C26:0;I:13880012-15072434	C26:0	C26:0	Fatty acid	F47G4.3	Fat	cel00564	C	Glycerophospholipid metabolism	gpdh-1	Glycerol-3-phosphate dehydrogenase [NAD(+)] [KO:K00006] [EC:1.1.1.8]	gpdh-1	I	14075824	0	0	0
C26:0;I:13880012-15072434	C26:0	C26:0	Fatty acid	Y105E8A.10	Fat	cel00600	C	Sphingolipid metabolism	hpo-13	Non-lysosomal glucosylceramidase [KO:K17108] [EC:3.2.1.45]	hpo-13	I	14418185	1	0	0
C26:0;I:13880012-15072434	C26:0	C26:0	Fatty acid	Y105E8A.4	Fat	cel00071	C	Fatty acid degradation	ech-7	Enoyl-CoA Hydratase [KO:K07511] [EC:4.2.1.17]	ech-7	I	14367566	0	0	3
C26:0;I:13880012-15072434	C26:0	C26:0	Fatty acid	Y105E8A.4	Fat	cel00062	C	Fatty acid elongation	ech-7	Enoyl-CoA Hydratase [KO:K07511] [EC:4.2.1.17]	ech-7	I	14367566	0	0	3
C26:0;I:13880012-15072434	C26:0	C26:0	Fatty acid	Y54E5A.1	Fat	cel00600	C	Sphingolipid metabolism	ttm-5	Putative sphingolipid delta(4)-desaturase/C4-monooxygenase [KO:K04712] [EC:1.14.18.5 1.14.19.17]	ttm-5	I	14688661	1	1	0

## Sheet: All_TF
qtl_peak	metabolite_fullname	metabolite_abbreviation	metabolite_type	gene_sequence_name	gene_public_name	gene_chromosome	gene_bp	gene_polymorf_highimpact	gene_polymorf_lowimpact	gene_polymorf_regulatory
C14:1;I:12190009-14660011	C14:1	C14:1	Fatty acid	C47F8.2	nhr-165	I	12331076	0	1	0
C14:1;I:12190009-14660011	C14:1	C14:1	Fatty acid	C47F8.8	nhr-81	I	12328091	1	0	0
C14:1;I:12190009-14660011	C14:1	C14:1	Fatty acid	C54C8.1	nhr-169	I	12442289	0	0	0
C14:1;I:12190009-14660011	C14:1	C14:1	Fatty acid	E03H4.13	nhr-89	I	12439926	0	0	0
C14:1;I:12190009-14660011	C14:1	C14:1	Fatty acid	E03H4.6	nhr-174	I	12417376	15	8	0
C14:1;I:12190009-14660011	C14:1	C14:1	Fatty acid	F41D3.1	nhr-82	I	12245447	1	0	0
C14:1;I:12190009-14660011	C14:1	C14:1	Fatty acid	F41D3.3	nhr-265	I	12251897	1	1	0
C14:1;I:12190009-14660011	C14:1	C14:1	Fatty acid	T09E11.2	nhr-217	I	12341136	6	2	0
C14:1;I:12190009-14660011	C14:1	C14:1	Fatty acid	T15D6.6	nhr-77	I	12384268	6	7	0
C14:1;I:12190009-14660011	C14:1	C14:1	Fatty acid	W04A8.7	taf-1	I	13861456	0	2	4
C14:1;I:12190009-14660011	C14:1	C14:1	Fatty acid	W05B5.3	nhr-85	I	13056080	1	0	1
C14:1;I:12190009-14660011	C14:1	C14:1	Fatty acid	W09C5.5	dkf-1	I	13640294	0	2	0
C14:1;I:12190009-14660011	C14:1	C14:1	Fatty acid	Y37H9A.3	Y37H9A.3	I	13778884	6	6	0
C14:1;I:12190009-14660011	C14:1	C14:1	Fatty acid	Y40B1A.4	sptf-3	I	13360664	0	0	0
C14:1;I:12190009-14660011	C14:1	C14:1	Fatty acid	Y71A12C.1	nhr-276	I	14041615	0	0	0
C15:1;I:12190009-15072434	C15:1	C15:1	Fatty acid	C47F8.2	nhr-165	I	12331076	0	1	0
C15:1;I:12190009-15072434	C15:1	C15:1	Fatty acid	C47F8.8	nhr-81	I	12328091	1	0	0
C15:1;I:12190009-15072434	C15:1	C15:1	Fatty acid	C54C8.1	nhr-169	I	12442289	0	0	0
C15:1;I:12190009-15072434	C15:1	C15:1	Fatty acid	E03H4.13	nhr-89	I	12439926	0	0	0
C15:1;I:12190009-15072434	C15:1	C15:1	Fatty acid	E03H4.6	nhr-174	I	12417376	15	8	0
C15:1;I:12190009-15072434	C15:1	C15:1	Fatty acid	F41D3.1	nhr-82	I	12245447	1	0	0
C15:1;I:12190009-15072434	C15:1	C15:1	Fatty acid	F41D3.3	nhr-265	I	12251897	1	1	0
C15:1;I:12190009-15072434	C15:1	C15:1	Fatty acid	T09E11.2	nhr-217	I	12341136	6	2	0
C15:1;I:12190009-15072434	C15:1	C15:1	Fatty acid	T15D6.6	nhr-77	I	12384268	6	7	0
C15:1;I:12190009-15072434	C15:1	C15:1	Fatty acid	W04A8.7	taf-1	I	13861456	0	2	4
C15:1;I:12190009-15072434	C15:1	C15:1	Fatty acid	W05B5.3	nhr-85	I	13056080	1	0	1
C15:1;I:12190009-15072434	C15:1	C15:1	Fatty acid	W09C5.5	dkf-1	I	13640294	0	2	0
C15:1;I:12190009-15072434	C15:1	C15:1	Fatty acid	Y37H9A.3	Y37H9A.3	I	13778884	6	6	0
C15:1;I:12190009-15072434	C15:1	C15:1	Fatty acid	Y40B1A.4	sptf-3	I	13360664	0	0	0
C15:1;I:12190009-15072434	C15:1	C15:1	Fatty acid	Y71A12C.1	nhr-276	I	14041615	0	0	0
C15:1;I:12190009-15072434	C15:1	C15:1	Fatty acid	ZK909.4	ces-2	I	14961490	0	0	0
C26:0;I:13880012-15072434	C26:0	C26:0	Fatty acid	Y71A12C.1	nhr-276	I	14041615	0	0	0
C26:0;I:13880012-15072434	C26:0	C26:0	Fatty acid	ZK909.4	ces-2	I	14961490	0	0	0
