# Supplementary material for: Natural genetic variation in C. elegans identified genomic loci controlling metabolite levels
Source: Genome Res. 2018 Sep;28(9):1296–308. doi: 10.1101/gr.232322.117 (PMC6120624; doi:10.1101/gr.232322.117)
Supplement: Supplemental Material [file supp_gr.232322.117_Supplemental_Table_S9.xlsx]

## Sheet: Sheet1
Supplemental Table S9:
The genotypes of the WN218 strain and the eight CB4856-genetic background introgression lines used in this study.
For the introgression regions, the number of supportive genetic variants over the total genetic variants is given (as determined by the hidden markov model).
Strain (alias)	Type	Introgression regions (n)	Introgression support (supportive/total)	Introgression list
CBN017	CB4856-background	1	999/1092	I:11405402-15072434
CBN019	CB4856-background	1	914/1005	I:11404587-15072434
CBN020	CB4856-background	1	515/604	I:12287134-15072434
CBN021	CB4856-background	1	278/329	I:12291299-15072434
WN218 (ewIR018)	N2-background	1	274/292	I:13998023-15072434
CBN051	CB4856-background	1	856/940	III:2186295-10929390
CBN079	CB4856-background	1	2131/2372	IV:1-13204935
CBN080	CB4856-background	1	312/343	IV:1-12814432
CBN081	CB4856-background	1	615/646	IV:1-12811959
CBN089	CB4856-background	1	599/687	IV:2809752-12774192
