# Supplementary material for: Natural genetic variation in C. elegans identified genomic loci controlling metabolite levels
Source: Genome Res. 2018 Sep;28(9):1296–308. doi: 10.1101/gr.232322.117 (PMC6120624; doi:10.1101/gr.232322.117)
Supplement: Supplemental Material [file supp_gr.232322.117_Supplemental_Table_S10.xlsx]

## Sheet: Supplemental_Table_S10
Supplemental Table S10:
The KEGG pathways used for identifying candidate genes.
KEGGpathway	Data_type	KEGG_name
61	Fat	Fatty acid biosynthesis
62	Fat	Fatty acid elongation
71	Fat	Fatty acid degradation
72	Fat	Synthesis and degradation of ketone bodies
73	Fat	Cutin, suberine and wax biosynthesis
100	Fat	Steroid biosynthesis
120	Fat	Primary bile acid biosynthesis
121	Fat	Secondary bile acid biosynthesis
140	Fat	Steroid hormone biosynthesis
561	Fat	Glycerolipid metabolism
564	Fat	Glycerophospholipid metabolism
565	Fat	Ether lipid metabolism
600	Fat	Sphingolipid metabolism
590	Fat	Arachidonic acid metabolism
591	Fat	Linoleic acid metabolism
592	Fat	alpha-Linolenic acid metabolism
1040	Fat	Biosynthesis of unsaturated fatty acids
