# Supplementary material for: Natural genetic variation in C. elegans identified genomic loci controlling metabolite levels
Source: HighWire-hosted journal article supplement (doi:10.1101/gr.232322.117), 2018-08-14
Supplement: Supplemental_Code.zip [file Lipid_collection.xlsx]

## Sheet: c.elegans lipid gene
Lipid Metabolism Genes in C. elegans
168 lipid metabolism genes collected by KEGG
Gene ID	Gene name	Predicted enzyme	Metabolism pathways	PATH ID
W09B6.1	pod-2	K11262 acetyl-CoA carboxylase / biotin carboxylase [EC:6.4.1.2 6.3.4.14]	Fatty acid biosynthesis	PATH:cel00061
F32H2.5	fasn-1	K00665 fatty acid synthase, animal type [EC:2.3.1.85]	Fatty acid biosynthesis	PATH:cel00061
W09H1.5	mecr-1	K07512 mitochondrial trans-2-enoyl-CoA reductase [EC:1.3.1.38]	Fatty acid elongation in mitochondria	PATH:cel00062
Y48A6B.9		K07512 mitochondrial trans-2-enoyl-CoA reductase [EC:1.3.1.38]	Fatty acid elongation in mitochondria	PATH:cel00062
F44C4.5	ppt-1	K01074 palmitoyl-protein thioesterase [EC:3.1.2.22]	Fatty acid elongation in mitochondria	PATH:cel00062
F53A2.7		K07508 acetyl-CoA acyltransferase 2 [EC:2.3.1.16]	Fatty acid metabolism	PATH:cel00071
B0303.3		K07509 acetyl-CoA acyltransferase [EC:2.3.1.16]	Fatty acid metabolism	PATH:cel00071
B0272.3		K00022 3-hydroxyacyl-CoA dehydrogenase [EC:1.1.1.35]	Fatty acid metabolism	PATH:cel00071
F01G10.2	ech-8	K00022 3-hydroxyacyl-CoA dehydrogenase [EC:1.1.1.35]	Fatty acid metabolism	PATH:cel00071
F01G10.3	ech-9	K00022 3-hydroxyacyl-CoA dehydrogenase [EC:1.1.1.35]	Fatty acid metabolism	PATH:cel00071
F54C8.1		K00022 3-hydroxyacyl-CoA dehydrogenase [EC:1.1.1.35]	Fatty acid metabolism	PATH:cel00071
R09B5.6	hacd-1	K00022 3-hydroxyacyl-CoA dehydrogenase [EC:1.1.1.35]	Fatty acid metabolism	PATH:cel00071
C29F3.1	ech-1	K07515 enoyl-CoA hydratase / long-chain 3-hydroxyacyl-CoA dehydrogenase [EC:4.2.1.17 1.1.1.211]	Fatty acid metabolism	PATH:cel00071
F43H9.1	ech-3	K01692 enoyl-CoA hydratase [EC:4.2.1.17]	Fatty acid metabolism	PATH:cel00071
F56B3.5	ech-5	K01692 enoyl-CoA hydratase [EC:4.2.1.17]	Fatty acid metabolism	PATH:cel00071
Y105E8A.4	ech-7	K01692 enoyl-CoA hydratase [EC:4.2.1.17]	Fatty acid metabolism	PATH:cel00071
T05G5.6	ech-6	K07511 enoyl-CoA hydratase [EC:4.2.1.17]	Fatty acid metabolism	PATH:cel00071
K05F1.3	acdh-8	K00249 acyl-CoA dehydrogenase [EC:1.3.99.3]	Fatty acid metabolism	PATH:cel00071
T08G2.3	acdh-10	K00249 acyl-CoA dehydrogenase [EC:1.3.99.3]	Fatty acid metabolism	PATH:cel00071
T25G12.5	acdh-7	K00249 acyl-CoA dehydrogenase [EC:1.3.99.3]	Fatty acid metabolism	PATH:cel00071
K06A5.6	acdh-3	K09478 short/branched chain acyl-CoA dehydrogenase [EC:1.3.99.12]	Fatty acid metabolism	PATH:cel00071
E04F6.5	acdh-12	K09479 very long chain acyl-CoA dehydrogenase [EC:1.3.99.-]	Fatty acid metabolism	PATH:cel00071
F54D5.7		K00252 glutaryl-CoA dehydrogenase [EC:1.3.99.7]	Fatty acid metabolism	PATH:cel00071
C46F4.2	acs-17	K01897 long-chain acyl-CoA synthetase [EC:6.2.1.3]	Fatty acid metabolism	PATH:cel00071
F28F8.2	acs-2	K01897 long-chain acyl-CoA synthetase [EC:6.2.1.3]	Fatty acid metabolism	PATH:cel00071
F37C12.7	acs-4	K01897 long-chain acyl-CoA synthetase [EC:6.2.1.3]	Fatty acid metabolism	PATH:cel00071
F47G6.2	acs-16	K01897 long-chain acyl-CoA synthetase [EC:6.2.1.3]	Fatty acid metabolism	PATH:cel00071
R07C3.4	acs-15	K01897 long-chain acyl-CoA synthetase [EC:6.2.1.3]	Fatty acid metabolism	PATH:cel00071
R09E10.3	acs-18	K01897 long-chain acyl-CoA synthetase [EC:6.2.1.3]	Fatty acid metabolism	PATH:cel00071
R09E10.4		K01897 long-chain acyl-CoA synthetase [EC:6.2.1.3]	Fatty acid metabolism	PATH:cel00071
Y65B4BL.5	acs-13	K01897 long-chain acyl-CoA synthetase [EC:6.2.1.3]	Fatty acid metabolism	PATH:cel00071
Y76A2B.3	acs-5	K01897 long-chain acyl-CoA synthetase [EC:6.2.1.3]	Fatty acid metabolism	PATH:cel00071
Y46G5A.17	cpt-1	K08765 carnitine O-palmitoyltransferase 1 [EC:2.3.1.21]	Fatty acid metabolism	PATH:cel00071
R07H5.2	cpt-2	K08766 carnitine O-palmitoyltransferase 2 [EC:2.3.1.21]	Fatty acid metabolism	PATH:cel00071
R06F6.9	ech-4	K13239 peroxisomal 3,2-trans-enoyl-CoA isomerase [EC:5.3.3.8]	Fatty acid metabolism	PATH:cel00071
T08B2.7		K07515 enoyl-CoA hydratase / long-chain 3-hydroxyacyl-CoA dehydrogenase [EC:4.2.1.17 1.1.1.211]	Fatty acid metabolism	PATH:cel00071
F58F9.7		K00232 acyl-CoA oxidase [EC:1.3.3.6]	Fatty acid metabolism	PATH:cel00071
K09H11.1		K00249 acyl-CoA dehydrogenase [EC:1.3.99.3]	Fatty acid metabolism	PATH:cel00071
T08B1.6	acs-3	K01897 long-chain acyl-CoA synthetase [EC:6.2.1.3]	Fatty acid metabolism	PATH:cel00071
H24K24.3		K00121 S-(hydroxymethyl)glutathione dehydrogenase / alcohol dehydrogenase [EC:1.1.1.284 1.1.1.1]	Fatty acid metabolism	PATH:cel00071
D2063.1		K13953 alcohol dehydrogenase, propanol-preferring [EC:1.1.1.1]	Fatty acid metabolism	PATH:cel00071
K12G11.3	sodh-1	K13953 alcohol dehydrogenase, propanol-preferring [EC:1.1.1.1]	Fatty acid metabolism	PATH:cel00071
K12G11.4	sodh-2	K13953 alcohol dehydrogenase, propanol-preferring [EC:1.1.1.1]	Fatty acid metabolism	PATH:cel00071
C49C8.4	cyp-33E1	K00493 unspecific monooxygenase [EC:1.14.14.1]	Fatty acid metabolism	PATH:cel00071
R08F11.3	cyp-33C8	K00493 unspecific monooxygenase [EC:1.14.14.1]	Fatty acid metabolism	PATH:cel00071
Y49C4A.9	cyp-33C11	K00493 unspecific monooxygenase [EC:1.14.14.1]	Fatty acid metabolism	PATH:cel00071
F25B4.6	hmgs-1	K01641 hydroxymethylglutaryl-CoA synthase [EC:2.3.3.10]	Synthesis and degradation of ketone bodies	PATH:cel00072
Y71G12B.10		K01640 hydroxymethylglutaryl-CoA lyase [EC:4.1.3.4]	Synthesis and degradation of ketone bodies	PATH:cel00072
C05C10.3		K01027 3-oxoacid CoA-transferase [EC:2.8.3.5]	Synthesis and degradation of ketone bodies	PATH:cel00072
T02G5.4		K00626 acetyl-CoA C-acetyltransferase [EC:2.3.1.9]	Synthesis and degradation of ketone bodies	PATH:cel00072
T02G5.7		K00626 acetyl-CoA C-acetyltransferase [EC:2.3.1.9]	Synthesis and degradation of ketone bodies	PATH:cel00072
T02G5.8	kat-1	K00626 acetyl-CoA C-acetyltransferase [EC:2.3.1.9]	Synthesis and degradation of ketone bodies	PATH:cel00072
F49E12.9		K07750 methylsterol monooxygenase [EC:1.14.13.72]	Steroid biosynthesis	PATH:cel00100
B0395.2	mboa-1	K00637 sterol O-acyltransferase [EC:2.3.1.26]	Steroid biosynthesis	PATH:cel00100
K06H7.9	idi-1	K01823 isopentenyl-diphosphate delta-isomerase [EC:5.3.3.2]	Steroid biosynthesis	PATH:cel00100
F32D8.13		K13273 phosphomevalonate kinase[EC:2.7.4.2]	Steroid biosynthesis	PATH:cel00100
Y42G9A.4	mvk-1	K00869 mevalonate kinase [EC:2.7.1.36]	Steroid biosynthesis	PATH:cel00100
C56G2.6	let-767	K00100 steroid dehydrogenase [EC:1.1.1.-]	Steroid hormone biosynthesis	PATH:cel00140
ZK40.1	acl-9	K13513 lysocardiolipin and lysophospholipid acyltransferase [EC:2.3.1.- 2.3.1.51]	Glycerolipid metabolism	PATH:cel00561
K04F1.15	alh-2	K00128 aldehyde dehydrogenase (NAD+) [EC:1.2.1.3]	Glycerolipid metabolism	PATH:cel00561
R11F4.1		K00864 glycerol kinase [EC:2.7.1.30]	Glycerolipid metabolism	PATH:cel00561
H19N07.4	mboa-2	K11155 diacylglycerol O-acyltransferase 1 [EC:2.3.1.20 2.3.1.75 2.3.1.76]	Glycerolipid metabolism	PATH:cel00561
F08F3.2	acl-6	K00629 glycerol-3-phosphate O-acyltransferase 1/2 [EC:2.3.1.15]	Glycerolipid metabolism	PATH:cel00561
F49H12.6	acl-4	K13506 glycerol-3-phosphate O-acyltransferase 3/4 [EC:2.3.1.15]	Glycerolipid metabolism	PATH:cel00561
R07E3.5	acl-5	K13506 glycerol-3-phosphate O-acyltransferase 3/4 [EC:2.3.1.15]	Glycerolipid metabolism	PATH:cel00561
F59F4.4	acl-1	K13509 lysophosphatidate acyltransferase [EC:2.3.1.51]	Glycerolipid metabolism	PATH:cel00561
T06E8.1	acl-2	K13509 lysophosphatidate acyltransferase [EC:2.3.1.51]	Glycerolipid metabolism	PATH:cel00561
T05H4.1	acl-8	K13513 lysocardiolipin and lysophospholipid acyltransferase [EC:2.3.1.- 2.3.1.51]	Glycerolipid metabolism	PATH:cel00561
F54D8.3	alh-1	K00128 aldehyde dehydrogenase (NAD+) [EC:1.2.1.3]	Glycerolipid metabolism	PATH:cel00561
T05H4.13	alh-4	K00128 aldehyde dehydrogenase (NAD+) [EC:1.2.1.3]	Glycerolipid metabolism	PATH:cel00561
F01F1.6	alh-9	K14085 aldehyde dehydrogenase family 7 member A1 [EC:1.2.1.31 1.2.1.8 1.2.1.3]	Glycerolipid metabolism	PATH:cel00561
Y69F12A.2	alh-12	K00149 aldehyde dehydrogenase family 9 member A1 [EC:1.2.1.47 1.2.1.3]	Glycerolipid metabolism	PATH:cel00561
Y39G8B.1		K00011 aldehyde reductase [EC:1.1.1.21]	Glycerolipid metabolism	PATH:cel00561
W02H5.8		K00863 dihydroxyacetone kinase [EC:2.7.1.29]	Glycerolipid metabolism	PATH:cel00561
F52C9.3		K09881 acylglycerol kinase [EC:2.7.1.94]	Glycerolipid metabolism	PATH:cel00561
F47G4.3	gpdh-1	K00006 glycerol-3-phosphate dehydrogenase (NAD+) [EC:1.1.1.8]	Glycerophospholipid metabolism	PATH:cel00564
Y46G5A.21	acl-7	K00649 glyceronephosphate O-acyltransferase [EC:2.3.1.42]	Glycerophospholipid metabolism	PATH:cel00564
C03H5.4		K01047 phospholipase A2 [EC:3.1.1.4]	Glycerophospholipid metabolism	PATH:cel00564
C07E3.9		K01047 phospholipase A2 [EC:3.1.1.4]	Glycerophospholipid metabolism	PATH:cel00564
F55C5.2		K01126 glycerophosphoryl diester phosphodiesterase [EC:3.1.4.46]	Glycerophospholipid metabolism	PATH:cel00564
C52B9.1	cka-2	K14156 choline/ethanolamine kinase [EC:2.7.1.32 2.7.1.82]	Glycerophospholipid metabolism	PATH:cel00564
F08C6.2	pcyt-1	K00968 choline-phosphate cytidylyltransferase [EC:2.7.7.15]	Glycerophospholipid metabolism	PATH:cel00564
F22E10.5	cept-1	K00993 ethanolaminephosphotransferase [EC:2.7.8.1]	Glycerophospholipid metabolism	PATH:cel00564
F54D7.2		K00993 ethanolaminephosphotransferase [EC:2.7.8.1]	Glycerophospholipid metabolism	PATH:cel00564
T27A10.3	ckc-1	K00894 ethanolamine kinase [EC:2.7.1.82]	Glycerophospholipid metabolism	PATH:cel00564
C39D10.3		K00967 ethanolamine-phosphate cytidylyltransferase [EC:2.7.7.14]	Glycerophospholipid metabolism	PATH:cel00564
Y37E3.11		K00967 ethanolamine-phosphate cytidylyltransferase [EC:2.7.7.14]	Glycerophospholipid metabolism	PATH:cel00564
C33H5.18		K00981 phosphatidate cytidylyltransferase [EC:2.7.7.41]	Glycerophospholipid metabolism	PATH:cel00564
ZC506.3	pssy-1	K08729 phosphatidylserine synthase 1 [EC:2.7.8.-]	Glycerophospholipid metabolism	PATH:cel00564
B0361.5	psd-1	K01613 phosphatidylserine decarboxylase [EC:4.1.1.65]	Glycerophospholipid metabolism	PATH:cel00564
ZK809.2	acl-3	K13511 monolysocardiolipin acyltransferase [EC:2.3.1.-]	Glycerophospholipid metabolism	PATH:cel00564
R155.1	mboa-6	K13515 lysophospholipid acyltransferase [EC:2.3.1.23 2.3.1.-]	Glycerophospholipid metabolism	PATH:cel00564
F14F3.3	mboa-7	K13516 lysophospholipid acyltransferase 7 [EC:2.3.1.-]	Glycerophospholipid metabolism	PATH:cel00564
K11H3.1	gpdh-2	K00006 glycerol-3-phosphate dehydrogenase (NAD+) [EC:1.1.1.8]	Glycerophospholipid metabolism	PATH:cel00564
T25G3.4		K00111 glycerol-3-phosphate dehydrogenase [EC:1.1.5.3]	Glycerophospholipid metabolism	PATH:cel00564
C54G7.2	mboa-3	K13517 lysophospholipid acyltransferase 1/2 [EC:2.3.1.51 2.3.1.-]	Glycerophospholipid metabolism	PATH:cel00564
C09E10.2	dgk-1	K00901 diacylglycerol kinase [EC:2.7.1.107]	Glycerophospholipid metabolism	PATH:cel00564
F42A9.1	dgk-4	K00901 diacylglycerol kinase [EC:2.7.1.107]	Glycerophospholipid metabolism	PATH:cel00564
F54G8.2	dgk-3	K00901 diacylglycerol kinase [EC:2.7.1.107]	Glycerophospholipid metabolism	PATH:cel00564
K06A1.6	dgk-5	K00901 diacylglycerol kinase [EC:2.7.1.107]	Glycerophospholipid metabolism	PATH:cel00564
C04G6.3	pld-1	K01115 phospholipase D [EC:3.1.4.4]	Glycerophospholipid metabolism	PATH:cel00564
W07A8.2		K01047 phospholipase A2 [EC:3.1.1.4]	Glycerophospholipid metabolism	PATH:cel00564
M05B5.4		K06129 lysophospholipase III [EC:3.1.1.5]	Glycerophospholipid metabolism	PATH:cel00564
K04G2.5	ath-1	K06130 lysophospholipase II [EC:3.1.1.5]	Glycerophospholipid metabolism	PATH:cel00564
M110.7		K14676 lysophospholipid hydrolase [EC:3.1.1.5]	Glycerophospholipid metabolism	PATH:cel00564
ZK370.4		K14676 lysophospholipid hydrolase [EC:3.1.1.5]	Glycerophospholipid metabolism	PATH:cel00564
T12B3.3		K01126 glycerophosphoryl diester phosphodiesterase [EC:3.1.4.46]	Glycerophospholipid metabolism	PATH:cel00564
ZC416.8	cha-1	K00623 choline O-acetyltransferase [EC:2.3.1.6]	Glycerophospholipid metabolism	PATH:cel00564
W09B12.1	ace-1	K01049 acetylcholinesterase [EC:3.1.1.7]	Glycerophospholipid metabolism	PATH:cel00564
Y44E3A.2	ace-2	K01049 acetylcholinesterase [EC:3.1.1.7]	Glycerophospholipid metabolism	PATH:cel00564
Y48B6A.7	ace-4	K01049 acetylcholinesterase [EC:3.1.1.7]	Glycerophospholipid metabolism	PATH:cel00564
Y48G1C.4	pgs-1	K00995 CDP-diacylglycerol--glycerol-3-phosphate 3-phosphatidyltransferase [EC:2.7.8.5]	Glycerophospholipid metabolism	PATH:cel00564
F23H11.9	crls-1	K08744 cardiolipin synthase [EC:2.7.8.-]	Glycerophospholipid metabolism	PATH:cel00564
K07B1.5	acl-14	K13514 lysophosphatidylglycerol acyltransferase 1 [EC:2.3.1.-]	Glycerophospholipid metabolism	PATH:cel00564
Y46G5A.5	pisy-1	K00999 CDP-diacylglycerol--inositol 3-phosphatidyltransferase [EC:2.7.8.11]	Glycerophospholipid metabolism	PATH:cel00564
Y50D7A.7	ads-1	K00803 alkyldihydroxyacetonephosphate synthase [EC:2.5.1.26]	Ether lipid metabolism	PATH:cel00565
T03G6.3		K08743 ectonucleotide pyrophosphatase/phosphodiesterase family member 6 [EC:3.1.4.-]	Ether lipid metabolism	PATH:cel00565
C52B9.7	paf-2	K01062 1-alkyl-2-acetylglycerophosphocholine esterase [EC:3.1.1.47]	Ether lipid metabolism	PATH:cel00565
T03F6.5	lis-1	K01062 1-alkyl-2-acetylglycerophosphocholine esterase [EC:3.1.1.47]	Ether lipid metabolism	PATH:cel00565
F42A9.5	cyp-33E2	K00493 unspecific monooxygenase [EC:1.14.14.1]	Arachidonic acid metabolism	PATH:cel00590
C11E4.1		K00432 glutathione peroxidase [EC:1.11.1.9]	Arachidonic acid metabolism	PATH:cel00590
C11E4.2		K00432 glutathione peroxidase [EC:1.11.1.9]	Arachidonic acid metabolism	PATH:cel00590
F26E4.12		K00432 glutathione peroxidase [EC:1.11.1.9]	Arachidonic acid metabolism	PATH:cel00590
R03G5.5		K00432 glutathione peroxidase [EC:1.11.1.9]	Arachidonic acid metabolism	PATH:cel00590
R05H10.5		K00432 glutathione peroxidase [EC:1.11.1.9]	Arachidonic acid metabolism	PATH:cel00590
C53D5.5		K00681 gamma-glutamyltranspeptidase [EC:2.3.2.2]	Arachidonic acid metabolism	PATH:cel00590
T03D8.6		K00681 gamma-glutamyltranspeptidase [EC:2.3.2.2]	Arachidonic acid metabolism	PATH:cel00590
Y7A9A.1		K00681 gamma-glutamyltranspeptidase [EC:2.3.2.2]	Arachidonic acid metabolism	PATH:cel00590
ZC416.6		K01254 leukotriene-A4 hydrolase [EC:3.3.2.6]	Arachidonic acid metabolism	PATH:cel00590
C06B3.4	stdh-1	K00100 steroid dehydrogenase [EC:1.1.1.-]	Linoleic acid metabolism	PATH:cel00591
C06B3.5	stdh-3	K00100 steroid dehydrogenase [EC:1.1.1.-]	Linoleic acid metabolism	PATH:cel00591
F11A5.12	stdh-2	K00100 steroid dehydrogenase [EC:1.1.1.-]	Linoleic acid metabolism	PATH:cel00591
F25G6.5	stdh-4	K00100 steroid dehydrogenase [EC:1.1.1.-]	Linoleic acid metabolism	PATH:cel00591
F08A8.4		K00232 acyl-CoA oxidase [EC:1.3.3.10]	α-Linolenic acid metabolism	PATH:cel00592
F25C8.1		K00232 acyl-CoA oxidase [EC:1.3.3.11]	α-Linolenic acid metabolism	PATH:cel00592
F59F4.1		K00232 acyl-CoA oxidase [EC:1.3.3.12]	α-Linolenic acid metabolism	PATH:cel00592
C48B4.1		K00232 acyl-CoA oxidase [EC:1.3.3.6]	α-Linolenic acid metabolism	PATH:cel00592
F08A8.1	acox-1	K00232 acyl-CoA oxidase [EC:1.3.3.7]	α-Linolenic acid metabolism	PATH:cel00592
F08A8.2		K00232 acyl-CoA oxidase [EC:1.3.3.8]	α-Linolenic acid metabolism	PATH:cel00592
F08A8.3		K00232 acyl-CoA oxidase [EC:1.3.3.9]	α-Linolenic acid metabolism	PATH:cel00592
F43H9.2	sptl-2	K00654 serine palmitoyltransferase [EC:2.3.1.50]	Sphingolipid metabolism	PATH:cel00600
T22G5.5	sptl-3	K00654 serine palmitoyltransferase [EC:2.3.1.50]	Sphingolipid metabolism	PATH:cel00600
F33D4.4		K04712 sphingolipid delta-4 desaturase [EC:1.14.-.-]	Sphingolipid metabolism	PATH:cel00600
Y54E5A.1	ttm-5	K04712 sphingolipid delta-4 desaturase [EC:1.14.-.-]	Sphingolipid metabolism	PATH:cel00600
F53H8.4	sms-2	K04714 shingomyelin synthase [EC:2.7.8.27]	Sphingolipid metabolism	PATH:cel00600
H21P03.3	sms-1	K04714 shingomyelin synthase [EC:2.7.8.27]	Sphingolipid metabolism	PATH:cel00600
Y22D7AL.8	sms-3	K04714 shingomyelin synthase [EC:2.7.8.27]	Sphingolipid metabolism	PATH:cel00600
F59G1.1	cgt-3	K00720 ceramide glucosyltransferase [EC:2.4.1.80]	Sphingolipid metabolism	PATH:cel00600
K11D2.2	asah-1	K12348 acid ceramidase [EC:3.5.1.23]	Sphingolipid metabolism	PATH:cel00600
B0252.2	asm-1	K12350 sphingomyelin phosphodiesterase [EC:3.1.4.12]	Sphingolipid metabolism	PATH:cel00600
W03G1.7	asm-3	K12350 sphingomyelin phosphodiesterase [EC:3.1.4.12]	Sphingolipid metabolism	PATH:cel00600
ZK455.4	asm-2	K12350 sphingomyelin phosphodiesterase [EC:3.1.4.12]	Sphingolipid metabolism	PATH:cel00600
T27F6.6		K12351 sphingomyelin phosphodiesterase 2 [EC:3.1.4.12]	Sphingolipid metabolism	PATH:cel00600
R05D11.9		K12353 sphingomyelin phosphodiesterase 4 [EC:3.1.4.12]	Sphingolipid metabolism	PATH:cel00600
T10B11.2		K04715 ceramide kinase [EC:2.7.1.138]	Sphingolipid metabolism	PATH:cel00600
Y66H1B.4	spl-1	K01634 sphinganine-1-phosphate aldolase [EC:4.1.2.27]	Sphingolipid metabolism	PATH:cel00600
C33C12.3		K01201 glucosylceramidase [EC:3.2.1.45]	Sphingolipid metabolism	PATH:cel00600
C33C12.8		K01201 glucosylceramidase [EC:3.2.1.45]	Sphingolipid metabolism	PATH:cel00600
F11E6.1		K01201 glucosylceramidase [EC:3.2.1.45]	Sphingolipid metabolism	PATH:cel00600
Y4C6B.6		K01201 glucosylceramidase [EC:3.2.1.45]	Sphingolipid metabolism	PATH:cel00600
T19B10.3		K12309 beta-galactosidase [EC:3.2.1.23]	Sphingolipid metabolism	PATH:cel00600
C29E4.10		K01202 galactosylceramidase [EC:3.2.1.46]	Sphingolipid metabolism	PATH:cel00600
F10D2.9	fat-7	K00507 stearoyl-CoA desaturase (delta-9 desaturase) [EC:1.14.19.1]	Biosynthesis of unsaturated fatty acids	PATH:cel01040
VZK822L.1	fat-6	K00507 stearoyl-CoA desaturase (delta-9 desaturase) [EC:1.14.19.1]	Biosynthesis of unsaturated fatty acids	PATH:cel01040
W06D12.3	fat-5	K00507 stearoyl-CoA desaturase (delta-9 desaturase) [EC:1.14.19.1]	Biosynthesis of unsaturated fatty acids	PATH:cel01040
Y67H2A.8	fat-1	K10257 omega-3 fatty acid desaturase (delta-15 desaturase) [EC:1.14.19.-]	Biosynthesis of unsaturated fatty acids	PATH:cel01040
T15B7.2	hpo-8	K10703 3-hydroxy acyl-CoA dehydratase [EC:4.2.1.-]	Biosynthesis of unsaturated fatty acids	PATH:cel01040
C15F1.6	art-1	K10258 enoyl reductase [EC:1.3.1.-]	Biosynthesis of unsaturated fatty acids	PATH:cel01040
147 orthologs of human metabolism genes (356) in KEGG
Gene ID	Gene Name	Annotation [Source: WormBase]	Metabolism pathways	PATH ID
F10G8.9		paralog of fasn-1, beta-ketoacyl synthase	Fatty acid biosynthesis	PATH:cel00061
C50D2.9		malonyl-CoA:ACP transacylase	Fatty acid biosynthesis	PATH:cel00061
T28F3.5		acetyl-CoA carboxylase	Fatty acid biosynthesis	PATH:cel00061
C31H5.6		palmitoyl-CoA hydrolase activity	Fatty acid elongation	PATH:cel00063
K05B2.4		long chain acyl-CoA thioesterase I	Fatty acid elongation	PATH:cel00063
Y71H10A.2	fard-1	acyl-CoA reductase	Fatty acid elongation	PATH:cel00063
T05E7.1		acyl-CoA thioesterase, long chain	Fatty acid elongation	PATH:cel00063
W03D8.8		acyl-CoA thioesterase, long chain	Fatty acid elongation	PATH:cel00063
T10E9.9	acdh-4	acyl CoA dehydrogenase	Fatty acid metabolism	PATH:cel00071
C55B7.4	acdh-1	acyl-CoA dehydrogenase	Fatty acid metabolism	PATH:cel00071
F42G9.5	alh-11	aldehyde dehydrogenase	Fatty acid metabolism	PATH:cel00071
T08B1.3	alh-5	aldehyde dehydrogenase	Fatty acid metabolism	PATH:cel00071
Y50D4C.2		alcohol dehydrogenase	Fatty acid metabolism	PATH:cel00071
C17C3.12	acdh-2	short-chain acyl-CoA dehydrogenase	Fatty acid metabolism	PATH:cel00071
F09E10.3	dhs-25	short-chain dehydrogenase	Fatty acid metabolism	PATH:cel00071
B0272.4		enoyl-CoA hydratase/isomerase	Fatty acid metabolism	PATH:cel00071
F52H2.6		ortholog of human gene 3 beta-hydroxysterol delta 24 reductase (DHCR24)	Steroid biosynthesis	PATH:cel00100
F49E12.10		C-4 sterol methyl oxidase	Steroid biosynthesis	PATH:cel00100
ZK177.5	cyp-44A1	ortholog of human cholesterol side-chain cleavage enzyme	Steroid biosynthesis	PATH:cel00100
C17C3.1		acyl-CoA thioesterase	Primary bile acid biosynthesis	PATH:cel00120
C17C3.3		acyl-CoA thioesterase	Primary bile acid biosynthesis	PATH:cel00120
C24A3.4		ortholog of human alpha-methylacyl-CoA racemase isoform 3	Primary bile acid biosynthesis	PATH:cel00120
C37H5.13		ortholog of huaman ACOT-8, acyl-CoA thioesterase	Primary bile acid biosynthesis	PATH:cel00120
F25E2.3		acyl-CoA thioesterase	Primary bile acid biosynthesis	PATH:cel00120
F35C8.5		C-4 sterol methyl oxidase	Primary bile acid biosynthesis	PATH:cel00120
Y87G2A.2		acyl-CoA thioesterase	Primary bile acid biosynthesis	PATH:cel00120
ZK892.4		orthologous to the human gene alpha-methylacyl-CoA racemase	Primary bile acid biosynthesis	PATH:cel00120
C10F3.2	dhs-16	short-chain dehydrogenase,dafachronic acids (DA) biosynthesis pathway	Primary bile acid biosynthesis	PATH:cel00120
E04F6.3	maoc-1	ortholog of human HSD17B4	Primary bile acid biosynthesis	PATH:cel00120
C04F6.5	dhs-27	paralog of human testosterone 17-beta-dehydrogenase 3	Steroid hormone biosynthesis	PATH:cel00140
F27D9.6	dhs-29	dehydrogenase	Steroid hormone biosynthesis	PATH:cel00140
F35B12.2	dhs-20	dehydrogenase	Steroid hormone biosynthesis	PATH:cel00140
F55A12.4	dhs-2	short-chain dehydrogenase	Steroid hormone biosynthesis	PATH:cel00140
F56D1.5	dhs-5	steroid dehydrogenase	Steroid hormone biosynthesis	PATH:cel00140
Y39A1A.11	dhs-11	short-chain dehydrogenase	Steroid hormone biosynthesis	PATH:cel00140
F19H6.4		3-oxo-5-alpha-steroid 4-dehydrogenase	Steroid hormone biosynthesis	PATH:cel00140
F42F12.3		3-oxo-5-alpha-steroid 4-dehydrogenase	Steroid hormone biosynthesis	PATH:cel00140
F55E10.6		short-chain dehydrogenase	Steroid hormone biosynthesis	PATH:cel00140
ZK1251.3		steroid reductase	Steroid hormone biosynthesis	PATH:cel00140
Y57A10C.6	daf-22	ortholog of human sterol carrier protein SCP2	Steroid hormone biosynthesis	PATH:cel00140
B0024.13		ortholog of human SRD5A3	Steroid hormone biosynthesis	PATH:cel00140
Y57E12B.3	lipl-6	paralog of lipl-4	Glycerolipid metabolism	PATH:cel00561
ZK6.7	lipl-5	paralog of lipl-4	Glycerolipid metabolism	PATH:cel00561
C13B9.2		paralogy of human isoform 2 of Glycerate kinase	Glycerolipid metabolism	PATH:cel00561
F46H6.2	dgk-2	diacylglycerol kinase	Glycerolipid metabolism	PATH:cel00561
F53C3.13		phosphatidic acid phosphatase type 2	Glycerolipid metabolism	PATH:cel00561
M79.2		paralog of acl-4 and acl-5,glycerol acyltransferase	Glycerolipid metabolism	PATH:cel00561
T28D9.3		phosphatidic acid phosphatase type 2	Glycerolipid metabolism	PATH:cel00561
F01G10.7	lipl-7	paralog of lipl-4	Glycerolipid metabolism	PATH:cel00561
F46B6.8	lipl-2	paralog of lipl-4	Glycerolipid metabolism	PATH:cel00561
F54F3.3	lipl-1	paralog of lipl-4	Glycerolipid metabolism	PATH:cel00561
K04A8.5	lipl-4	triglyceride lipase	Glycerolipid metabolism	PATH:cel00561
R11G11.14	lipl-3	paralog of lipl-4	Glycerolipid metabolism	PATH:cel00561
Y50E8A.7	lipl-8	paralog of lipl-4	Glycerolipid metabolism	PATH:cel00561
C05D11.7	tagl	patatin/phospholipaseA2-related	Glycerolipid metabolism	PATH:cel00561
F59A1.10		acyl-CoA:diacylglycerol acyltransferase (DGAT) [KOG0831]	Glycerolipid metabolism	PATH:cel00561
K07B1.4		acyl-CoA:diacylglycerol acyltransferase (DGAT) [KOG0831]	Glycerolipid metabolism	PATH:cel00561
W01A11.2	dgtr-1	acyl-CoA:diacylglycerol acyltransferase (DGAT) [KOG0831]	Glycerolipid metabolism	PATH:cel00561
Y53G8B.2		acyl-CoA:diacylglycerol acyltransferase (DGAT) [KOG0831]	Glycerolipid metabolism	PATH:cel00561
C07D8.5		ortholog of human AKR1A1	Glycerolipid metabolism	PATH:cel00561
ZK550.1	mboa-5	putative transmembrane O-acyl transferase (MBOAT)	Glycerophospholipid metabolism	PATH:cel00564
R07B7.9		lipase	Glycerophospholipid metabolism	PATH:cel00564
T19D7.7		lipase, GDSL	Glycerophospholipid metabolism	PATH:cel00564
Y50E8A.6		putative mitochondrial glycerol-3-phosphate dehydrogenase	Glycerophospholipid metabolism	PATH:cel00564
Y65B4BR.1		ortholog of human phospholipase B1	Glycerophospholipid metabolism	PATH:cel00564
Y69A2AL.2		phospholipase A2	Glycerophospholipid metabolism	PATH:cel00564
Y73B6BL.37		lipase	Glycerophospholipid metabolism	PATH:cel00564
B0285.9	ckb-2	encodes an isoform of choline kinase	Glycerophospholipid metabolism	PATH:cel00564
C28D4.2	cka-1	encodes an isoform of choline kinase	Glycerophospholipid metabolism	PATH:cel00564
F22F7.5	ckb-4	choline/ethanolamine kinase	Glycerophospholipid metabolism	PATH:cel00564
Y49A3A.1		choline/ethanolaminephosphotransferase choline phosphotransferase 1	Glycerophospholipid metabolism	PATH:cel00564
C08F8.4	mboa-4	O-acyl transferase (MBOAT)	Glycerophospholipid metabolism	PATH:cel00564
C40C9.5	nlg-1	paralog of ace-1,ace-2 and ace-3	Glycerophospholipid metabolism	PATH:cel00564
F09C8.1		ortholog of human Phospholipase B1	Glycerophospholipid metabolism	PATH:cel00564
F13H8.11		ortholog of human phospholipase B1	Glycerophospholipid metabolism	PATH:cel00564
F36A2.9		lipase	Glycerophospholipid metabolism	PATH:cel00564
F47A4.5		Ca2+-independent phospholipase A2	Glycerophospholipid metabolism	PATH:cel00564
R07B7.8		lipase	Glycerophospholipid metabolism	PATH:cel00564
T27E9.5	pssy-2	phosphatidyl serine synthase	Glycerophospholipid metabolism	PATH:cel00564
W02B12.1		lipase	Glycerophospholipid metabolism	PATH:cel00564
Y48B6A.8	ace-3	acetylcholinesterase (AChE)	Glycerophospholipid metabolism	PATH:cel00564
C01C10.3	acl-12	paralog of acl-8 and acl-9	Glycerophospholipid metabolism	PATH:cel00564
F08G5.2	acl-13	paralog of acl-8 and acl-9	Glycerophospholipid metabolism	PATH:cel00564
F55A11.5	bus-18	lysocardiolipin acyltransferase	Glycerophospholipid metabolism	PATH:cel00564
B0285.10	ckb-3	a putative choline kinase	Glycerophospholipid metabolism	PATH:cel00564
B0285.8	ckb-1	a putative choline kinase	Glycerophospholipid metabolism	PATH:cel00564
F28A10.10		paralogy of pcyt-1,cytidylyltransferase	Glycerophospholipid metabolism	PATH:cel00564
Y18H1A.11		paralogy of pcyt-2,cytidylyltransferase	Glycerophospholipid metabolism	PATH:cel00564
C27A7.3		Type I phosphodiesterase/nucleotide pyrophosphatase	Ether lipid metabolism	PATH:cel00565
F13H10.5		type I phosphodiesterase/nucleotide pyrophosphatase	Ether lipid metabolism	PATH:cel00565
W03G9.6	paf-1	type II platelet-activating factor-acetylhydrolase (PAF-AH)	Ether lipid metabolism	PATH:cel00565
C27A7.1		ortholog of the human gene NPPASE	Ether lipid metabolism	PATH:cel00565
C26F1.2	cyp-32A1	ortholog of human leukotriene-B(4) omega-hydroxylase 1	Arachidonic acid metabolism	PATH:cel00590
C42C1.11		bifunctional leukotriene A4 hydrolase/aminopeptidase LTA4H	Arachidonic acid metabolism	PATH:cel00590
F01D5.9	cyp-37A1	paralog of human CYP4A11	Arachidonic acid metabolism	PATH:cel00590
F40G12.9		gamma-glutamyltransferase	Arachidonic acid metabolism	PATH:cel00590
R11A8.5		glutathione S-transferase-related protein	Arachidonic acid metabolism	PATH:cel00590
R11G1.3	gst-11	glutathione S-transferase	Arachidonic acid metabolism	PATH:cel00590
T19H12.6		gamma-glutamyltranspeptidase	Arachidonic acid metabolism	PATH:cel00590
Y5H2B.5	cyp-32B1	ortholog of human leukotriene-B(4) omega-hydroxylase 1	Arachidonic acid metabolism	PATH:cel00590
Y94H6A.4		glutathione peroxidase	Arachidonic acid metabolism	PATH:cel00590
F28G4.1	cyp-37B1	paralog of human CYP4A11	Arachidonic acid metabolism	PATH:cel00590
K02F3.6	ceeh-1	epoxide hydrolase (sEH)	Arachidonic acid metabolism	PATH:cel00590
T19B10.1	cyp-29A2	oxidoreductase	Arachidonic acid metabolism	PATH:cel00590
Y38C9B.1	cyp-29A3	ortholog of human leukotriene-B(4) omega-hydroxylase 1	Arachidonic acid metabolism	PATH:cel00590
B0331.1	cyp-29A4	ortholog of human leukotriene-B4 20-monooxygenase	Arachidonic acid metabolism	PATH:cel00590
C36A4.1	cyp-25A1	ortholog of huamn CYP3A4	Linoleic acid metabolism	PATH:cel00591
C36A4.2	cyp-25A2	ortholog of huamn CYP3A4	Linoleic acid metabolism	PATH:cel00591
C36A4.3	cyp-25A3	ortholog of huamn CYP3A4	Linoleic acid metabolism	PATH:cel00591
C36A4.6	cyp-25A4	ortholog of huamn CYP3A4	Linoleic acid metabolism	PATH:cel00591
F42A6.4	cyp-25A5	ortholog of huamn CYP3A4	Linoleic acid metabolism	PATH:cel00591
K06B9.1	cyp-25A6	ortholog of huamn CYP3A4	Linoleic acid metabolism	PATH:cel00591
F02C12.5	cyp-13B1	ortholog of huamn CYP3A4	Linoleic acid metabolism	PATH:cel00591
F14F7.2	cyp-13A11	ortholog of huamn CYP3A4	Linoleic acid metabolism	PATH:cel00591
F14F7.3	cyp-13A12	ortholog of huamn CYP3A4	Linoleic acid metabolism	PATH:cel00591
K06G5.2	cyp-13B2	ortholog of huamn CYP3A4	Linoleic acid metabolism	PATH:cel00591
T10B9.1	cyp-13A4	ortholog of huamn CYP3A4	Linoleic acid metabolism	PATH:cel00591
T10B9.10	cyp-13A7	ortholog of huamn CYP3A4	Linoleic acid metabolism	PATH:cel00591
T10B9.2	cyp-13A5	ortholog of huamn CYP3A4	Linoleic acid metabolism	PATH:cel00591
T10B9.3	cyp-13A6	ortholog of huamn CYP3A4	Linoleic acid metabolism	PATH:cel00591
T10B9.4	cyp-13A8	ortholog of huamn CYP3A4	Linoleic acid metabolism	PATH:cel00591
T10B9.5	cyp-13A3	ortholog of huamn CYP3A4	Linoleic acid metabolism	PATH:cel00591
T10B9.7	cyp-13A2	ortholog of huamn CYP3A4	Linoleic acid metabolism	PATH:cel00591
ZK1320.4	cyp-13A10	ortholog of huamn CYP3A4	Linoleic acid metabolism	PATH:cel00591
T10B9.8	cyp-13A1	ortholog of huamn CYP3A4	Linoleic acid metabolism	PATH:cel00591
D1014.1	sul-2	sulfatase	Sphingolipid metabolism	PATH:cel00600
F01E11.1	ugt-57	UDP-glucuronosyl transferase	Sphingolipid metabolism	PATH:cel00600
F27E5.1		choloylglycine hydrolase	Sphingolipid metabolism	PATH:cel00600
F35H8.6	ugt-58	UDP-glucuronosyl transferase	Sphingolipid metabolism	PATH:cel00600
F54C1.1		UDP-glucuronosyl	Sphingolipid metabolism	PATH:cel00600
H22K11.2		glycoside hydrolase, family 35	Sphingolipid metabolism	PATH:cel00600
R07B7.11	gana-1	alpha-galactosidase (alpha-GAL)	Sphingolipid metabolism	PATH:cel00600
W02B12.11		UDP-gal:glucosylceramide beta-1,4-galactosyltransferase	Sphingolipid metabolism	PATH:cel00600
W02F12.2		alkaline ceramidase	Sphingolipid metabolism	PATH:cel00600
W07E6.3		phosphatidylcholine:ceramide cholinephosphotransferase 2	Sphingolipid metabolism	PATH:cel00600
Y104H12D.3		glutamate decarboxylase/sphingosine phosphate lyase	Sphingolipid metabolism	PATH:cel00600
C23H3.4	sptl-1	serine palmitoyltransferase	Sphingolipid metabolism	PATH:cel00600
F20B4.6	cgt-2	ceramide glucosyltransferase	Sphingolipid metabolism	PATH:cel00600
T06C12.10	cgt-1	ceramide glucosyltransferase	Sphingolipid metabolism	PATH:cel00600
C34C6.5	sphk-1	sphingosine kinase	Sphingolipid metabolism	PATH:cel00600
B0222.4	tag-38	glutamate decarboxylase/sphingosine phosphate lyase	Sphingolipid metabolism	PATH:cel00600
C01B10.9		ectonucleotide pyrophosphatase/phosphodiesterase 7	Sphingolipid metabolism	PATH:cel00600
W08D2.4	fat-3	delta-6 fatty acid desaturase	Biosynthesis of unsaturated fatty acids	PATH:cel01040
T13F2.1	fat-4	delta-5 fatty acid desaturase	Biosynthesis of unsaturated fatty acids	PATH:cel01040
C40H1.4	elo-4	polyunsaturated fatty acid (PUFA) elongase	unclear
D2024.3	elo-3	polyunsaturated fatty acid (PUFA) elongase	unclear
Y53F4B.2	elo-9	polyunsaturated fatty acid (PUFA) elongase	unclear
156 lipid metabolism genes retrieved from Wormbase and literatures
Gene ID	Gene Name	Annotation [Source: WormBase]	Metabolism pathways	PATH ID
F40F4.2	lbp-2	small intracellular fatty acid binding proteins (iFABPs)	Fatty acid biosynthesis	PATH:cel00061
F40F4.3	lbp-1	fatty acid binding protein (FABP)	Fatty acid biosynthesis	PATH:cel00061
F40F4.4	lbp-3	fatty acid binding protein (FABP)	Fatty acid biosynthesis	PATH:cel00061
T22G5.2	lbp-7	intracellular fatty acid binding protein (iFABP)	Fatty acid biosynthesis	PATH:cel00061
T22G5.6	lbp-8	intracellular fatty acid binding protein (FABPs)	Fatty acid biosynthesis	PATH:cel00061
W02D3.5	lbp-6	intracellular fatty acid binding protein (iFABP)	Fatty acid biosynthesis	PATH:cel00061
W02D3.7	lbp-5	intracellular fatty acid binding protein (iFABP)	Fatty acid biosynthesis	PATH:cel00061
Y40B10A.1	lbp-9	intracellular fatty acid binding protein (iFABP)	Fatty acid biosynthesis	PATH:cel00061
ZK742.5	lbp-4	fatty acid binding protein	Fatty acid biosynthesis	PATH:cel00061
F41H10.7	elo-5	polyunsaturated fatty acid (PUFA) elongase	Fatty acid biosynthesis	PATH:cel00061
F41H10.8	elo-6	polyunsaturated fatty acid (PUFA) elongase	Fatty acid biosynthesis	PATH:cel00061
Y56A3A.19		acyl carrier protein (ACP)	Fatty acid biosynthesis	PATH:cel00061
EEED8.2		cytosolic fatty-acid binding	Fatty acid biosynthesis	PATH:cel00061
EEED8.3		fatty acid-binding protein	Fatty acid biosynthesis	PATH:cel00061
F09F3.9	cpt-5	carnitine palmitoyl transferase	Fatty acid metabolism	PATH:cel00071
Y48G9A.10	cpt-3	carnitine palmitoyl transferase	Fatty acid metabolism	PATH:cel00071
F28A10.6	acdh-9	acyl-CoA dehydrogenase	Fatty acid metabolism	PATH:cel00071
D1009.1	acs-22	very long chain fatty acid acyl-CoA synthetase	Fatty acid metabolism	PATH:cel00071
F28D1.9	acs-20	very long chain fatty acid acyl-CoA synthetase	Fatty acid metabolism	PATH:cel00071
F41C3.3	acs-11	acyl-CoA synthase	Fatty acid metabolism	PATH:cel00071
F46E10.1	acs-1	acyl-CoA synthase	Fatty acid metabolism	PATH:cel00071
W01A11.5	cpt-6	carnitine palmitoyl transferase	Fatty acid metabolism	PATH:cel00071
F13D12.9		CFA/mycolic acid synthase	Fatty acid metabolism	PATH:cel00071
F38H4.8	ech-2	enoyl-CoA hydratase	Fatty acid metabolism	PATH:cel00071
F01G4.2	ard-1	3-hydroxyacyl-CoA dehydrogenase	Fatty acid metabolism	PATH:cel00071
K11D12.4	cpt-4	carnitine palmitoyl transferase	Fatty acid metabolism	PATH:cel00071
ZK1127.2	acs-6	fatty Acid CoA Synthetase	Fatty acid metabolism	PATH:cel00071
C01G6.7	acs-7	fatty Acid CoA Synthetase	Fatty acid metabolism	PATH:cel00071
C52B9.9	acs-8	4-coumarate coA ligase	Fatty acid metabolism	PATH:cel00071
T20F7.7	acs-9	fatty Acid CoA Synthetase	Fatty acid metabolism	PATH:cel00071
AH10.1	acs-10	fatty Acid CoA Synthetase	Fatty acid metabolism	PATH:cel00071
F25C8.4	acs-12	fatty Acid CoA Synthetase	Fatty acid metabolism	PATH:cel00071
F11A3.1	acs-14	fatty Acid CoA Synthetase	Fatty acid metabolism	PATH:cel00071
C36A4.9	acs-19	fatty Acid CoA Synthetase	Fatty acid metabolism	PATH:cel00071
C50H11.1	acs-21	fatty Acid CoA Synthetase	Fatty acid metabolism	PATH:cel00071
Y45F3A.3	acdh-11	Very-long-chain acyl-CoA dehydrogenase	Fatty acid metabolism	PATH:cel00071
C28C12.9	acdh-13	Very-long-chain acyl-CoA dehydrogenase	Fatty acid metabolism	PATH:cel00071
C37A2.3	acdh-5	acyl-CoA dehydrogenase	Fatty acid metabolism	PATH:cel00071
C02D5.1	acdh-6	acyl-CoA dehydrogenase	Fatty acid metabolism	PATH:cel00071
C05C9.1		lipid-binding serum glycoprotein, cholesteryl ester transfer protein	Steroid biosynthesis	PATH:cel00100
F55B12.5	nrf-5	cholesterol-ester-binding protein	Steroid biosynthesis	PATH:cel00100
R148.6	heh-1	orthologous to human NPC2	Steroid biosynthesis	PATH:cel00100
F02E8.6	ncr-1	cholesterol transport protein	Steroid biosynthesis	PATH:cel00100
F09G8.4	ncr-2	cholesterol transport protein	Steroid biosynthesis	PATH:cel00100
C25A1.5		fatty acid hydroxylase, C-5 sterol desaturase and C-4 sterol methyl oxidase	Steroid biosynthesis	PATH:cel00100
F08F8.2		HMG-CoA reductase	Steroid biosynthesis	PATH:cel00100
T13C5.1	daf-9	steroidogenic or fatty acid hydroxylase	Steroid hormone biosynthesis	PATH:cel00140
C46C11.1	hosl-1	ortholog of hormone-sensitive lipase (LIPE)	Glycerolipid metabolism	PATH:cel00561
C04B4.3	lips-2	lipase	Glycerolipid metabolism	PATH:cel00561
C09E8.2	lips-7	lipase	Glycerolipid metabolism	PATH:cel00561
F10F2.3	lips-3	lipase	Glycerolipid metabolism	PATH:cel00561
F14E5.5	lips-10	lipase	Glycerolipid metabolism	PATH:cel00561
F31F6.7	lips-8	lipase	Glycerolipid metabolism	PATH:cel00561
F45E6.4	lips-1	lipase	Glycerolipid metabolism	PATH:cel00561
F58G1.5	lips-9	lipase	Glycerolipid metabolism	PATH:cel00561
H17B01.3	lips-14	lipase	Glycerolipid metabolism	PATH:cel00561
K12B6.3	lips-4	lipase	Glycerolipid metabolism	PATH:cel00561
R07G3.2	lips-17	lipase	Glycerolipid metabolism	PATH:cel00561
T01C3.4	fil-1	lipase	Glycerolipid metabolism	PATH:cel00561
T12A7.4	lips-5	lipase	Glycerolipid metabolism	PATH:cel00561
Y38E10A.10	lips-16	lipase	Glycerolipid metabolism	PATH:cel00561
Y38E10A.7	lips-15	lipase	Glycerolipid metabolism	PATH:cel00561
ZK617.2	lips-6	lipase	Glycerolipid metabolism	PATH:cel00561
Y49E10.16		lipase	Glycerolipid metabolism	PATH:cel00561
T13B5.5	lips-11	Triacylglycerol lipase	Glycerolipid metabolism	PATH:cel00561
T13B5.6	lips-12	Triacylglycerol lipase	Glycerolipid metabolism	PATH:cel00561
T13B5.7	lips-13	LIPaSe related	Glycerolipid metabolism	PATH:cel00561
C54D1.4	alh-10	aldehyde dehydrogenase	Glycerolipid metabolism	PATH:cel00561
F36H1.6	alh-3	aldehyde dehydrogenase	Glycerolipid metabolism	PATH:cel00561
F56D12.1	alh-6	aldehyde dehydrogenase	Glycerolipid metabolism	PATH:cel00561
F45H10.1	alh-7	aldehyde dehydrogenase	Glycerolipid metabolism	PATH:cel00561
F13D12.4	alh-8	aldehyde dehydrogenase	Glycerolipid metabolism	PATH:cel00561
D1044.1		choline/ethanolamine kinase	Glycerophospholipid metabolism	PATH:cel00564
D1037.5		patatin/phospholipaseA2-rel	Glycerophospholipid metabolism	PATH:cel00564
H23L24.2		patatin/phospholipaseA2-rel	Glycerophospholipid metabolism	PATH:cel00564
C49F5.1	sams-1	S-adenosyl methionine synthetase	Glycerophospholipid metabolism	PATH:cel00564
T05C3.6		phospholipase D3/Transphosphatidylase	Glycerophospholipid metabolism	PATH:cel00564
F53B3.2		O-methyltransferase [KOG1663]	Glycerophospholipid metabolism	PATH:cel00564
Y40B10A.6		O-methyltransferase [KOG1663]	Glycerophospholipid metabolism	PATH:cel00564
H37A05.1	lpin-1	putative phosphatidic acid phosphatase	Glycerophospholipid metabolism	PATH:cel00564
K12H4.5		phosphatidylserine decarboxylase	Glycerophospholipid metabolism	PATH:cel00564
Y40B10A.2		O-methyltransferase [KOG1663]	Glycerophospholipid metabolism	PATH:cel00564
Y40B10A.7		O-methyltransferase	Glycerophospholipid metabolism	PATH:cel00564
F28B3.9	acl-11	paralog of acl-8 and acl-9	Glycerophospholipid metabolism	PATH:cel00564
B0395.3		orthologous to the human gene choline acetyltransferase isoform R	Glycerophospholipid metabolism	PATH:cel00564
F41E7.6		acyltransferase ChoActase	Glycerophospholipid metabolism	PATH:cel00564
T20B3.1		acyltransferase ChoActase	Glycerophospholipid metabolism	PATH:cel00564
B0348.4	egl-8	phospholipase C	Glycerophospholipid metabolism	PATH:cel00564
M03A1.6	ipla-1	phospholipase A2	Glycerophospholipid metabolism	PATH:cel00564
F31B12.1	plc-1	phospholipase C	Glycerophospholipid metabolism	PATH:cel00564
Y75B12B.6	plc-2	phospholipase C	Glycerophospholipid metabolism	PATH:cel00564
T01E8.3	plc-3	phospholipase C	Glycerophospholipid metabolism	PATH:cel00564
R05G6.8	plc-4	phospholipase C	Glycerophospholipid metabolism	PATH:cel00564
K10F12.3	pll-1	phospholipase C	Glycerophospholipid metabolism	PATH:cel00564
C03G6.14	cyp-35A1	cholesterol 7-alpha-monooxygenase-type	Arachidonic acid metabolism	PATH:cel00590
C03G6.15	cyp-35A2	cholesterol 7-alpha-monooxygenase-type	Arachidonic acid metabolism	PATH:cel00590
C49G7.8	cyp-35A4	cholesterol 7-alpha-monooxygenase-type	Arachidonic acid metabolism	PATH:cel00590
K07C6.5	cyp-35A5	cholesterol 7-alpha-monooxygenase-type	Arachidonic acid metabolism	PATH:cel00590
K07C5.5	ceeh-2	epoxide hydrolase (sEH) orthologous to human ABHD7 and ABHD9	Arachidonic acid metabolism	PATH:cel00590
C09G4.1	hyl-1	ceramide synthase	Sphingolipid metabolism	PATH:cel00600
K02G10.6	hyl-2	ceramide synthase	Sphingolipid metabolism	PATH:cel00600
Y6B3B.10	lagr-1	ceramide synthase	Sphingolipid metabolism	PATH:cel00600
F11E6.5	elo-2	polyunsaturated fatty acid (PUFA) elongase	Biosynthesis of unsaturated fatty acids	PATH:cel01040
F56H11.4	elo-1	polyunsaturated fatty acid (PUFA) elongase	Biosynthesis of unsaturated fatty acids	PATH:cel01040
W02A2.1	fat-2	delta-12 fatty acyl desaturase	Biosynthesis of unsaturated fatty acids	PATH:cel01040
F56H11.3	elo-7	polyunsaturated fatty acid (PUFA) elongase	unclear
Y47D3A.30	elo-8	polyunsaturated fatty acid (PUFA) elongase	unclear
C04E12.7	scrm-3	scramblase	unclear
F11A6.2	scrm-4	scramblase	unclear
F46A8.10	scrm-6	scramblase	unclear
K08D10.7	scrm-8	scramblase	unclear
K08D10.8	scrm-5	scramblase	unclear
T22H2.5	scrm-1	scramblase	unclear
Y50E8A.9	scrm-7	scramblase	unclear
ZK1053.5	scrm-2	scramblase	unclear
K07C6.4	cyp-35B1	cytochrome P450 CYP2 subfamily	unclear
H02I12.8	cyp-31A2	hydroxylate polyunsaturated fats	unclear
Y17G9B.3	cyp-31A3	involved in the production of lipid(s) required for eggshell formation	unclear
M03A8.1	dhs-28	SCP2 sterol-binding domain	unclear
T02E1.5	dhs-3	short-chain dehydrogenases/reductase	unclear
C01G8.3	dhs-1	Dehydrogenases	unclear
K08F4.9	dhs-12	Dehydrogenases	unclear
F36H9.3	dhs-13	Dehydrogenases	unclear
R05D8.8	dhs-14	Dehydrogenases	unclear
R05D8.10	dhs-15	Dehydrogenases	unclear
F29G9.6	dhs-17	Dehydrogenases	unclear
C45B11.3	dhs-18	Dehydrogenases	unclear
T11F9.11	dhs-19	Dehydrogenases	unclear
R11D1.11	dhs-21	Dehydrogenases	unclear
C15H11.4	dhs-22	Dehydrogenases	unclear
R08H2.1	dhs-23	Dehydrogenases	unclear
Y60A3A.10	dhs-24	Dehydrogenases	unclear
ZK816.5	dhs-26	Dehydrogenases	unclear
T25G12.7	dhs-30	Dehydrogenases	unclear
T04B2.6	dhs-31	Dehydrogenases	unclear
T05F1.10	dhs-4	Dehydrogenases	unclear
C17G10.8	dhs-6	Dehydrogenases	unclear
E04F6.7	dhs-7	Dehydrogenases	unclear
K10H10.3	dhs-8	Dehydrogenases	unclear
Y32H12A.3	dhs-9	Dehydrogenases	unclear
C25G4.2		Phospholipase/carboxyhydrolase	unclear
D1054.1		Patatin-Like phospholipase	unclear
F38E9.1		Phosphatidylinositol-Specific phospholipase C	unclear
F42G9.6		triacylglycerol lipase	unclear
H41C03.2		triacylglycerol lipase	unclear
Y37E11AR.4	nape-1	N-Acyl Phosphatidyl Ethanolamine specific phospholipase D	unclear
Y37E11AR.3	nape-2	N-Acyl Phosphatidyl Ethanolamine specific phospholipase D	unclear
F27C8.6	trcs-1	lipase	unclear
Y73B6BL.4		Calcium-Independent phospholipase A2	unclear
Y49E10.11	tat-1	flippase	unclear
H06H21.10	tat-2	flippase	unclear
W09D10.2	tat-3	flippase	unclear
T24H7.5	tat-4	flippase	unclear
F36H2.1	tat-5	flippase	unclear
F02C9.3	tat-6	flippase	unclear
T22H6.2	alh-13	aldehyde dehydrogenase	unclear

## Sheet: Sheet1
W09B6.1		KEGG	168
F32H2.5		Human Orthologs	147
W09H1.5		Literature	156
Y48A6B.9			471
F44C4.5
F53A2.7
B0303.3
B0272.3
F01G10.2
F01G10.3
F54C8.1
R09B5.6
C29F3.1
F43H9.1
F56B3.5
Y105E8A.4
T05G5.6
K05F1.3
T08G2.3
T25G12.5
K06A5.6
E04F6.5
F54D5.7
C46F4.2
F28F8.2
F37C12.7
F47G6.2
R07C3.4
R09E10.3
R09E10.4
Y65B4BL.5
Y76A2B.3
Y46G5A.17
R07H5.2
R06F6.9
T08B2.7
F58F9.7
K09H11.1
T08B1.6
H24K24.3
D2063.1
K12G11.3
K12G11.4
C49C8.4
R08F11.3
Y49C4A.9
F25B4.6
Y71G12B.10
C05C10.3
T02G5.4
T02G5.7
T02G5.8
F49E12.9
B0395.2
K06H7.9
F32D8.13
Y42G9A.4
C56G2.6
ZK40.1
K04F1.15
R11F4.1
H19N07.4
F08F3.2
F49H12.6
R07E3.5
F59F4.4
T06E8.1
T05H4.1
F54D8.3
T05H4.13
F01F1.6
Y69F12A.2
Y39G8B.1
W02H5.8
F52C9.3
F47G4.3
Y46G5A.21
C03H5.4
C07E3.9
F55C5.2
C52B9.1
F08C6.2
F22E10.5
F54D7.2
T27A10.3
C39D10.3
Y37E3.11
C33H5.18
ZC506.3
B0361.5
ZK809.2
R155.1
F14F3.3
K11H3.1
T25G3.4
C54G7.2
C09E10.2
F42A9.1
F54G8.2
K06A1.6
C04G6.3
W07A8.2
M05B5.4
K04G2.5
M110.7
ZK370.4
T12B3.3
ZC416.8
W09B12.1
Y44E3A.2
Y48B6A.7
Y48G1C.4
F23H11.9
K07B1.5
Y46G5A.5
Y50D7A.7
T03G6.3
C52B9.7
T03F6.5
F42A9.5
C11E4.1
C11E4.2
F26E4.12
R03G5.5
R05H10.5
C53D5.5
T03D8.6
Y7A9A.1
ZC416.6
C06B3.4
C06B3.5
F11A5.12
F25G6.5
F08A8.4
F25C8.1
F59F4.1
C48B4.1
F08A8.1
F08A8.2
F08A8.3
F43H9.2
T22G5.5
F33D4.4
Y54E5A.1
F53H8.4
H21P03.3
Y22D7AL.8
F59G1.1
K11D2.2
B0252.2
W03G1.7
ZK455.4
T27F6.6
R05D11.9
T10B11.2
Y66H1B.4
C33C12.3
C33C12.8
F11E6.1
Y4C6B.6
T19B10.3
C29E4.10
F10D2.9
VZK822L.1
W06D12.3
Y67H2A.8
T15B7.2
C15F1.6
F10G8.9
C50D2.9
T28F3.5
C31H5.6
K05B2.4
Y71H10A.2
T05E7.1
W03D8.8
T10E9.9
C55B7.4
F42G9.5
T08B1.3
Y50D4C.2
C17C3.12
F09E10.3
B0272.4
F52H2.6
F49E12.10
ZK177.5
C17C3.1
C17C3.3
C24A3.4
C37H5.13
F25E2.3
F35C8.5
Y87G2A.2
ZK892.4
C10F3.2
E04F6.3
C04F6.5
F27D9.6
F35B12.2
F55A12.4
F56D1.5
Y39A1A.11
F19H6.4
F42F12.3
F55E10.6
ZK1251.3
Y57A10C.6
B0024.13
Y57E12B.3
ZK6.7
C13B9.2
F46H6.2
F53C3.13
M79.2
T28D9.3
F01G10.7
F46B6.8
F54F3.3
K04A8.5
R11G11.14
Y50E8A.7
C05D11.7
F59A1.10
K07B1.4
W01A11.2
Y53G8B.2
C07D8.5
ZK550.1
R07B7.9
T19D7.7
Y50E8A.6
Y65B4BR.1
Y69A2AL.2
Y73B6BL.37
B0285.9
C28D4.2
F22F7.5
Y49A3A.1
C08F8.4
C40C9.5
F09C8.1
F13H8.11
F36A2.9
F47A4.5
R07B7.8
T27E9.5
W02B12.1
Y48B6A.8
C01C10.3
F08G5.2
F55A11.5
B0285.10
B0285.8
F28A10.10
Y18H1A.11
C27A7.3
F13H10.5
W03G9.6
C27A7.1
C26F1.2
C42C1.11
F01D5.9
F40G12.9
R11A8.5
R11G1.3
T19H12.6
Y5H2B.5
Y94H6A.4
F28G4.1
K02F3.6
T19B10.1
Y38C9B.1
B0331.1
C36A4.1
C36A4.2
C36A4.3
C36A4.6
F42A6.4
K06B9.1
F02C12.5
F14F7.2
F14F7.3
K06G5.2
T10B9.1
T10B9.10
T10B9.2
T10B9.3
T10B9.4
T10B9.5
T10B9.7
ZK1320.4
T10B9.8
D1014.1
F01E11.1
F27E5.1
F35H8.6
F54C1.1
H22K11.2
R07B7.11
W02B12.11
W02F12.2
W07E6.3
Y104H12D.3
C23H3.4
F20B4.6
T06C12.10
C34C6.5
B0222.4
C01B10.9
W08D2.4
T13F2.1
C40H1.4
D2024.3
Y53F4B.2
F40F4.2
F40F4.3
F40F4.4
T22G5.2
T22G5.6
W02D3.5
W02D3.7
Y40B10A.1
ZK742.5
F41H10.7
F41H10.8
Y56A3A.19
EEED8.2
EEED8.3
F09F3.9
Y48G9A.10
F28A10.6
D1009.1
F28D1.9
F41C3.3
F46E10.1
W01A11.5
F13D12.9
F38H4.8
F01G4.2
K11D12.4
ZK1127.2
C01G6.7
C52B9.9
T20F7.7
AH10.1
F25C8.4
F11A3.1
C36A4.9
C50H11.1
Y45F3A.3
C28C12.9
C37A2.3
C02D5.1
C05C9.1
F55B12.5
R148.6
F02E8.6
F09G8.4
C25A1.5
F08F8.2
T13C5.1
C46C11.1
C04B4.3
C09E8.2
F10F2.3
F14E5.5
F31F6.7
F45E6.4
F58G1.5
H17B01.3
K12B6.3
R07G3.2
T01C3.4
T12A7.4
Y38E10A.10
Y38E10A.7
ZK617.2
Y49E10.16
T13B5.5
T13B5.6
T13B5.7
C54D1.4
F36H1.6
F56D12.1
F45H10.1
F13D12.4
D1044.1
D1037.5
H23L24.2
C49F5.1
T05C3.6
F53B3.2
Y40B10A.6
H37A05.1
K12H4.5
Y40B10A.2
Y40B10A.7
F28B3.9
B0395.3
F41E7.6
T20B3.1
B0348.4
M03A1.6
F31B12.1
Y75B12B.6
T01E8.3
R05G6.8
K10F12.3
C03G6.14
C03G6.15
C49G7.8
K07C6.5
K07C5.5
C09G4.1
K02G10.6
Y6B3B.10
F11E6.5
F56H11.4
W02A2.1
F56H11.3
Y47D3A.30
C04E12.7
F11A6.2
F46A8.10
K08D10.7
K08D10.8
T22H2.5
Y50E8A.9
ZK1053.5
K07C6.4
H02I12.8
Y17G9B.3
M03A8.1
T02E1.5
C01G8.3
K08F4.9
F36H9.3
R05D8.8
R05D8.10
F29G9.6
C45B11.3
T11F9.11
R11D1.11
C15H11.4
R08H2.1
Y60A3A.10
ZK816.5
T25G12.7
T04B2.6
T05F1.10
C17G10.8
E04F6.7
K10H10.3
Y32H12A.3
C25G4.2
D1054.1
F38E9.1
F42G9.6
H41C03.2
Y37E11AR.4
Y37E11AR.3
F27C8.6
Y73B6BL.4
Y49E10.11
H06H21.10
W09D10.2
T24H7.5
F36H2.1
F02C9.3
T22H6.2

## Sheet: Sheet2
source	Gene ID	Gene name	Predicted enzyme	Metabolism pathways	PATHID
lipid_met_genes_KEGG	W09B6.1	pod-2	K11262 acetyl-CoA carboxylase / biotin carboxylase [EC:6.4.1.2 6.3.4.14]	Fatty acid biosynthesis	PATH:cel00061
lipid_met_genes_KEGG	F32H2.5	fasn-1	K00665 fatty acid synthase, animal type [EC:2.3.1.85]	Fatty acid biosynthesis	PATH:cel00061
lipid_met_genes_KEGG	W09H1.5	mecr-1	K07512 mitochondrial trans-2-enoyl-CoA reductase [EC:1.3.1.38]	Fatty acid elongation in mitochondria	PATH:cel00062
lipid_met_genes_KEGG	Y48A6B.9		K07512 mitochondrial trans-2-enoyl-CoA reductase [EC:1.3.1.38]	Fatty acid elongation in mitochondria	PATH:cel00062
lipid_met_genes_KEGG	F44C4.5	ppt-1	K01074 palmitoyl-protein thioesterase [EC:3.1.2.22]	Fatty acid elongation in mitochondria	PATH:cel00062
lipid_met_genes_KEGG	F53A2.7		K07508 acetyl-CoA acyltransferase 2 [EC:2.3.1.16]	Fatty acid metabolism	PATH:cel00071
lipid_met_genes_KEGG	B0303.3		K07509 acetyl-CoA acyltransferase [EC:2.3.1.16]	Fatty acid metabolism	PATH:cel00071
lipid_met_genes_KEGG	B0272.3		K00022 3-hydroxyacyl-CoA dehydrogenase [EC:1.1.1.35]	Fatty acid metabolism	PATH:cel00071
lipid_met_genes_KEGG	F01G10.2	ech-8	K00022 3-hydroxyacyl-CoA dehydrogenase [EC:1.1.1.35]	Fatty acid metabolism	PATH:cel00071
lipid_met_genes_KEGG	F01G10.3	ech-9	K00022 3-hydroxyacyl-CoA dehydrogenase [EC:1.1.1.35]	Fatty acid metabolism	PATH:cel00071
lipid_met_genes_KEGG	F54C8.1		K00022 3-hydroxyacyl-CoA dehydrogenase [EC:1.1.1.35]	Fatty acid metabolism	PATH:cel00071
lipid_met_genes_KEGG	R09B5.6	hacd-1	K00022 3-hydroxyacyl-CoA dehydrogenase [EC:1.1.1.35]	Fatty acid metabolism	PATH:cel00071
lipid_met_genes_KEGG	C29F3.1	ech-1	K07515 enoyl-CoA hydratase / long-chain 3-hydroxyacyl-CoA dehydrogenase [EC:4.2.1.17 1.1.1.211]	Fatty acid metabolism	PATH:cel00071
lipid_met_genes_KEGG	F43H9.1	ech-3	K01692 enoyl-CoA hydratase [EC:4.2.1.17]	Fatty acid metabolism	PATH:cel00071
lipid_met_genes_KEGG	F56B3.5	ech-5	K01692 enoyl-CoA hydratase [EC:4.2.1.17]	Fatty acid metabolism	PATH:cel00071
lipid_met_genes_KEGG	Y105E8A.4	ech-7	K01692 enoyl-CoA hydratase [EC:4.2.1.17]	Fatty acid metabolism	PATH:cel00071
lipid_met_genes_KEGG	T05G5.6	ech-6	K07511 enoyl-CoA hydratase [EC:4.2.1.17]	Fatty acid metabolism	PATH:cel00071
lipid_met_genes_KEGG	K05F1.3	acdh-8	K00249 acyl-CoA dehydrogenase [EC:1.3.99.3]	Fatty acid metabolism	PATH:cel00071
lipid_met_genes_KEGG	T08G2.3	acdh-10	K00249 acyl-CoA dehydrogenase [EC:1.3.99.3]	Fatty acid metabolism	PATH:cel00071
lipid_met_genes_KEGG	T25G12.5	acdh-7	K00249 acyl-CoA dehydrogenase [EC:1.3.99.3]	Fatty acid metabolism	PATH:cel00071
lipid_met_genes_KEGG	K06A5.6	acdh-3	K09478 short/branched chain acyl-CoA dehydrogenase [EC:1.3.99.12]	Fatty acid metabolism	PATH:cel00071
lipid_met_genes_KEGG	E04F6.5	acdh-12	K09479 very long chain acyl-CoA dehydrogenase [EC:1.3.99.-]	Fatty acid metabolism	PATH:cel00071
lipid_met_genes_KEGG	F54D5.7		K00252 glutaryl-CoA dehydrogenase [EC:1.3.99.7]	Fatty acid metabolism	PATH:cel00071
lipid_met_genes_KEGG	C46F4.2	acs-17	K01897 long-chain acyl-CoA synthetase [EC:6.2.1.3]	Fatty acid metabolism	PATH:cel00071
lipid_met_genes_KEGG	F28F8.2	acs-2	K01897 long-chain acyl-CoA synthetase [EC:6.2.1.3]	Fatty acid metabolism	PATH:cel00071
lipid_met_genes_KEGG	F37C12.7	acs-4	K01897 long-chain acyl-CoA synthetase [EC:6.2.1.3]	Fatty acid metabolism	PATH:cel00071
lipid_met_genes_KEGG	F47G6.2	acs-16	K01897 long-chain acyl-CoA synthetase [EC:6.2.1.3]	Fatty acid metabolism	PATH:cel00071
lipid_met_genes_KEGG	R07C3.4	acs-15	K01897 long-chain acyl-CoA synthetase [EC:6.2.1.3]	Fatty acid metabolism	PATH:cel00071
lipid_met_genes_KEGG	R09E10.3	acs-18	K01897 long-chain acyl-CoA synthetase [EC:6.2.1.3]	Fatty acid metabolism	PATH:cel00071
lipid_met_genes_KEGG	R09E10.4		K01897 long-chain acyl-CoA synthetase [EC:6.2.1.3]	Fatty acid metabolism	PATH:cel00071
lipid_met_genes_KEGG	Y65B4BL.5	acs-13	K01897 long-chain acyl-CoA synthetase [EC:6.2.1.3]	Fatty acid metabolism	PATH:cel00071
lipid_met_genes_KEGG	Y76A2B.3	acs-5	K01897 long-chain acyl-CoA synthetase [EC:6.2.1.3]	Fatty acid metabolism	PATH:cel00071
lipid_met_genes_KEGG	Y46G5A.17	cpt-1	K08765 carnitine O-palmitoyltransferase 1 [EC:2.3.1.21]	Fatty acid metabolism	PATH:cel00071
lipid_met_genes_KEGG	R07H5.2	cpt-2	K08766 carnitine O-palmitoyltransferase 2 [EC:2.3.1.21]	Fatty acid metabolism	PATH:cel00071
lipid_met_genes_KEGG	R06F6.9	ech-4	K13239 peroxisomal 3,2-trans-enoyl-CoA isomerase [EC:5.3.3.8]	Fatty acid metabolism	PATH:cel00071
lipid_met_genes_KEGG	T08B2.7		K07515 enoyl-CoA hydratase / long-chain 3-hydroxyacyl-CoA dehydrogenase [EC:4.2.1.17 1.1.1.211]	Fatty acid metabolism	PATH:cel00071
lipid_met_genes_KEGG	F58F9.7		K00232 acyl-CoA oxidase [EC:1.3.3.6]	Fatty acid metabolism	PATH:cel00071
lipid_met_genes_KEGG	K09H11.1		K00249 acyl-CoA dehydrogenase [EC:1.3.99.3]	Fatty acid metabolism	PATH:cel00071
lipid_met_genes_KEGG	T08B1.6	acs-3	K01897 long-chain acyl-CoA synthetase [EC:6.2.1.3]	Fatty acid metabolism	PATH:cel00071
lipid_met_genes_KEGG	H24K24.3		K00121 S-(hydroxymethyl)glutathione dehydrogenase / alcohol dehydrogenase [EC:1.1.1.284 1.1.1.1]	Fatty acid metabolism	PATH:cel00071
lipid_met_genes_KEGG	D2063.1		K13953 alcohol dehydrogenase, propanol-preferring [EC:1.1.1.1]	Fatty acid metabolism	PATH:cel00071
lipid_met_genes_KEGG	K12G11.3	sodh-1	K13953 alcohol dehydrogenase, propanol-preferring [EC:1.1.1.1]	Fatty acid metabolism	PATH:cel00071
lipid_met_genes_KEGG	K12G11.4	sodh-2	K13953 alcohol dehydrogenase, propanol-preferring [EC:1.1.1.1]	Fatty acid metabolism	PATH:cel00071
lipid_met_genes_KEGG	C49C8.4	cyp-33E1	K00493 unspecific monooxygenase [EC:1.14.14.1]	Fatty acid metabolism	PATH:cel00071
lipid_met_genes_KEGG	R08F11.3	cyp-33C8	K00493 unspecific monooxygenase [EC:1.14.14.1]	Fatty acid metabolism	PATH:cel00071
lipid_met_genes_KEGG	Y49C4A.9	cyp-33C11	K00493 unspecific monooxygenase [EC:1.14.14.1]	Fatty acid metabolism	PATH:cel00071
lipid_met_genes_KEGG	F25B4.6	hmgs-1	K01641 hydroxymethylglutaryl-CoA synthase [EC:2.3.3.10]	Synthesis and degradation of ketone bodies	PATH:cel00072
lipid_met_genes_KEGG	Y71G12B.10		K01640 hydroxymethylglutaryl-CoA lyase [EC:4.1.3.4]	Synthesis and degradation of ketone bodies	PATH:cel00072
lipid_met_genes_KEGG	C05C10.3		K01027 3-oxoacid CoA-transferase [EC:2.8.3.5]	Synthesis and degradation of ketone bodies	PATH:cel00072
lipid_met_genes_KEGG	T02G5.4		K00626 acetyl-CoA C-acetyltransferase [EC:2.3.1.9]	Synthesis and degradation of ketone bodies	PATH:cel00072
lipid_met_genes_KEGG	T02G5.7		K00626 acetyl-CoA C-acetyltransferase [EC:2.3.1.9]	Synthesis and degradation of ketone bodies	PATH:cel00072
lipid_met_genes_KEGG	T02G5.8	kat-1	K00626 acetyl-CoA C-acetyltransferase [EC:2.3.1.9]	Synthesis and degradation of ketone bodies	PATH:cel00072
lipid_met_genes_KEGG	F49E12.9		K07750 methylsterol monooxygenase [EC:1.14.13.72]	Steroid biosynthesis	PATH:cel00100
lipid_met_genes_KEGG	B0395.2	mboa-1	K00637 sterol O-acyltransferase [EC:2.3.1.26]	Steroid biosynthesis	PATH:cel00100
lipid_met_genes_KEGG	K06H7.9	idi-1	K01823 isopentenyl-diphosphate delta-isomerase [EC:5.3.3.2]	Steroid biosynthesis	PATH:cel00100
lipid_met_genes_KEGG	F32D8.13		K13273 phosphomevalonate kinase[EC:2.7.4.2]	Steroid biosynthesis	PATH:cel00100
lipid_met_genes_KEGG	Y42G9A.4	mvk-1	K00869 mevalonate kinase [EC:2.7.1.36]	Steroid biosynthesis	PATH:cel00100
lipid_met_genes_KEGG	C56G2.6	let-767	K00100 steroid dehydrogenase [EC:1.1.1.-]	Steroid hormone biosynthesis	PATH:cel00140
lipid_met_genes_KEGG	ZK40.1	acl-9	K13513 lysocardiolipin and lysophospholipid acyltransferase [EC:2.3.1.- 2.3.1.51]	Glycerolipid metabolism	PATH:cel00561
lipid_met_genes_KEGG	K04F1.15	alh-2	K00128 aldehyde dehydrogenase (NAD+) [EC:1.2.1.3]	Glycerolipid metabolism	PATH:cel00561
lipid_met_genes_KEGG	R11F4.1		K00864 glycerol kinase [EC:2.7.1.30]	Glycerolipid metabolism	PATH:cel00561
lipid_met_genes_KEGG	H19N07.4	mboa-2	K11155 diacylglycerol O-acyltransferase 1 [EC:2.3.1.20 2.3.1.75 2.3.1.76]	Glycerolipid metabolism	PATH:cel00561
lipid_met_genes_KEGG	F08F3.2	acl-6	K00629 glycerol-3-phosphate O-acyltransferase 1/2 [EC:2.3.1.15]	Glycerolipid metabolism	PATH:cel00561
lipid_met_genes_KEGG	F49H12.6	acl-4	K13506 glycerol-3-phosphate O-acyltransferase 3/4 [EC:2.3.1.15]	Glycerolipid metabolism	PATH:cel00561
lipid_met_genes_KEGG	R07E3.5	acl-5	K13506 glycerol-3-phosphate O-acyltransferase 3/4 [EC:2.3.1.15]	Glycerolipid metabolism	PATH:cel00561
lipid_met_genes_KEGG	F59F4.4	acl-1	K13509 lysophosphatidate acyltransferase [EC:2.3.1.51]	Glycerolipid metabolism	PATH:cel00561
lipid_met_genes_KEGG	T06E8.1	acl-2	K13509 lysophosphatidate acyltransferase [EC:2.3.1.51]	Glycerolipid metabolism	PATH:cel00561
lipid_met_genes_KEGG	T05H4.1	acl-8	K13513 lysocardiolipin and lysophospholipid acyltransferase [EC:2.3.1.- 2.3.1.51]	Glycerolipid metabolism	PATH:cel00561
lipid_met_genes_KEGG	F54D8.3	alh-1	K00128 aldehyde dehydrogenase (NAD+) [EC:1.2.1.3]	Glycerolipid metabolism	PATH:cel00561
lipid_met_genes_KEGG	T05H4.13	alh-4	K00128 aldehyde dehydrogenase (NAD+) [EC:1.2.1.3]	Glycerolipid metabolism	PATH:cel00561
lipid_met_genes_KEGG	F01F1.6	alh-9	K14085 aldehyde dehydrogenase family 7 member A1 [EC:1.2.1.31 1.2.1.8 1.2.1.3]	Glycerolipid metabolism	PATH:cel00561
lipid_met_genes_KEGG	Y69F12A.2	alh-12	K00149 aldehyde dehydrogenase family 9 member A1 [EC:1.2.1.47 1.2.1.3]	Glycerolipid metabolism	PATH:cel00561
lipid_met_genes_KEGG	Y39G8B.1		K00011 aldehyde reductase [EC:1.1.1.21]	Glycerolipid metabolism	PATH:cel00561
lipid_met_genes_KEGG	W02H5.8		K00863 dihydroxyacetone kinase [EC:2.7.1.29]	Glycerolipid metabolism	PATH:cel00561
lipid_met_genes_KEGG	F52C9.3		K09881 acylglycerol kinase [EC:2.7.1.94]	Glycerolipid metabolism	PATH:cel00561
lipid_met_genes_KEGG	F47G4.3	gpdh-1	K00006 glycerol-3-phosphate dehydrogenase (NAD+) [EC:1.1.1.8]	Glycerophospholipid metabolism	PATH:cel00564
lipid_met_genes_KEGG	Y46G5A.21	acl-7	K00649 glyceronephosphate O-acyltransferase [EC:2.3.1.42]	Glycerophospholipid metabolism	PATH:cel00564
lipid_met_genes_KEGG	C03H5.4		K01047 phospholipase A2 [EC:3.1.1.4]	Glycerophospholipid metabolism	PATH:cel00564
lipid_met_genes_KEGG	C07E3.9		K01047 phospholipase A2 [EC:3.1.1.4]	Glycerophospholipid metabolism	PATH:cel00564
lipid_met_genes_KEGG	F55C5.2		K01126 glycerophosphoryl diester phosphodiesterase [EC:3.1.4.46]	Glycerophospholipid metabolism	PATH:cel00564
lipid_met_genes_KEGG	C52B9.1	cka-2	K14156 choline/ethanolamine kinase [EC:2.7.1.32 2.7.1.82]	Glycerophospholipid metabolism	PATH:cel00564
lipid_met_genes_KEGG	F08C6.2	pcyt-1	K00968 choline-phosphate cytidylyltransferase [EC:2.7.7.15]	Glycerophospholipid metabolism	PATH:cel00564
lipid_met_genes_KEGG	F22E10.5	cept-1	K00993 ethanolaminephosphotransferase [EC:2.7.8.1]	Glycerophospholipid metabolism	PATH:cel00564
lipid_met_genes_KEGG	F54D7.2		K00993 ethanolaminephosphotransferase [EC:2.7.8.1]	Glycerophospholipid metabolism	PATH:cel00564
lipid_met_genes_KEGG	T27A10.3	ckc-1	K00894 ethanolamine kinase [EC:2.7.1.82]	Glycerophospholipid metabolism	PATH:cel00564
lipid_met_genes_KEGG	C39D10.3		K00967 ethanolamine-phosphate cytidylyltransferase [EC:2.7.7.14]	Glycerophospholipid metabolism	PATH:cel00564
lipid_met_genes_KEGG	Y37E3.11		K00967 ethanolamine-phosphate cytidylyltransferase [EC:2.7.7.14]	Glycerophospholipid metabolism	PATH:cel00564
lipid_met_genes_KEGG	C33H5.18		K00981 phosphatidate cytidylyltransferase [EC:2.7.7.41]	Glycerophospholipid metabolism	PATH:cel00564
lipid_met_genes_KEGG	ZC506.3	pssy-1	K08729 phosphatidylserine synthase 1 [EC:2.7.8.-]	Glycerophospholipid metabolism	PATH:cel00564
lipid_met_genes_KEGG	B0361.5	psd-1	K01613 phosphatidylserine decarboxylase [EC:4.1.1.65]	Glycerophospholipid metabolism	PATH:cel00564
lipid_met_genes_KEGG	ZK809.2	acl-3	K13511 monolysocardiolipin acyltransferase [EC:2.3.1.-]	Glycerophospholipid metabolism	PATH:cel00564
lipid_met_genes_KEGG	R155.1	mboa-6	K13515 lysophospholipid acyltransferase [EC:2.3.1.23 2.3.1.-]	Glycerophospholipid metabolism	PATH:cel00564
lipid_met_genes_KEGG	F14F3.3	mboa-7	K13516 lysophospholipid acyltransferase 7 [EC:2.3.1.-]	Glycerophospholipid metabolism	PATH:cel00564
lipid_met_genes_KEGG	K11H3.1	gpdh-2	K00006 glycerol-3-phosphate dehydrogenase (NAD+) [EC:1.1.1.8]	Glycerophospholipid metabolism	PATH:cel00564
lipid_met_genes_KEGG	T25G3.4		K00111 glycerol-3-phosphate dehydrogenase [EC:1.1.5.3]	Glycerophospholipid metabolism	PATH:cel00564
lipid_met_genes_KEGG	C54G7.2	mboa-3	K13517 lysophospholipid acyltransferase 1/2 [EC:2.3.1.51 2.3.1.-]	Glycerophospholipid metabolism	PATH:cel00564
lipid_met_genes_KEGG	C09E10.2	dgk-1	K00901 diacylglycerol kinase [EC:2.7.1.107]	Glycerophospholipid metabolism	PATH:cel00564
lipid_met_genes_KEGG	F42A9.1	dgk-4	K00901 diacylglycerol kinase [EC:2.7.1.107]	Glycerophospholipid metabolism	PATH:cel00564
lipid_met_genes_KEGG	F54G8.2	dgk-3	K00901 diacylglycerol kinase [EC:2.7.1.107]	Glycerophospholipid metabolism	PATH:cel00564
lipid_met_genes_KEGG	K06A1.6	dgk-5	K00901 diacylglycerol kinase [EC:2.7.1.107]	Glycerophospholipid metabolism	PATH:cel00564
lipid_met_genes_KEGG	C04G6.3	pld-1	K01115 phospholipase D [EC:3.1.4.4]	Glycerophospholipid metabolism	PATH:cel00564
lipid_met_genes_KEGG	W07A8.2		K01047 phospholipase A2 [EC:3.1.1.4]	Glycerophospholipid metabolism	PATH:cel00564
lipid_met_genes_KEGG	M05B5.4		K06129 lysophospholipase III [EC:3.1.1.5]	Glycerophospholipid metabolism	PATH:cel00564
lipid_met_genes_KEGG	K04G2.5	ath-1	K06130 lysophospholipase II [EC:3.1.1.5]	Glycerophospholipid metabolism	PATH:cel00564
lipid_met_genes_KEGG	M110.7		K14676 lysophospholipid hydrolase [EC:3.1.1.5]	Glycerophospholipid metabolism	PATH:cel00564
lipid_met_genes_KEGG	ZK370.4		K14676 lysophospholipid hydrolase [EC:3.1.1.5]	Glycerophospholipid metabolism	PATH:cel00564
lipid_met_genes_KEGG	T12B3.3		K01126 glycerophosphoryl diester phosphodiesterase [EC:3.1.4.46]	Glycerophospholipid metabolism	PATH:cel00564
lipid_met_genes_KEGG	ZC416.8	cha-1	K00623 choline O-acetyltransferase [EC:2.3.1.6]	Glycerophospholipid metabolism	PATH:cel00564
lipid_met_genes_KEGG	W09B12.1	ace-1	K01049 acetylcholinesterase [EC:3.1.1.7]	Glycerophospholipid metabolism	PATH:cel00564
lipid_met_genes_KEGG	Y44E3A.2	ace-2	K01049 acetylcholinesterase [EC:3.1.1.7]	Glycerophospholipid metabolism	PATH:cel00564
lipid_met_genes_KEGG	Y48B6A.7	ace-4	K01049 acetylcholinesterase [EC:3.1.1.7]	Glycerophospholipid metabolism	PATH:cel00564
lipid_met_genes_KEGG	Y48G1C.4	pgs-1	K00995 CDP-diacylglycerol--glycerol-3-phosphate 3-phosphatidyltransferase [EC:2.7.8.5]	Glycerophospholipid metabolism	PATH:cel00564
lipid_met_genes_KEGG	F23H11.9	crls-1	K08744 cardiolipin synthase [EC:2.7.8.-]	Glycerophospholipid metabolism	PATH:cel00564
lipid_met_genes_KEGG	K07B1.5	acl-14	K13514 lysophosphatidylglycerol acyltransferase 1 [EC:2.3.1.-]	Glycerophospholipid metabolism	PATH:cel00564
lipid_met_genes_KEGG	Y46G5A.5	pisy-1	K00999 CDP-diacylglycerol--inositol 3-phosphatidyltransferase [EC:2.7.8.11]	Glycerophospholipid metabolism	PATH:cel00564
lipid_met_genes_KEGG	Y50D7A.7	ads-1	K00803 alkyldihydroxyacetonephosphate synthase [EC:2.5.1.26]	Ether lipid metabolism	PATH:cel00565
lipid_met_genes_KEGG	T03G6.3		K08743 ectonucleotide pyrophosphatase/phosphodiesterase family member 6 [EC:3.1.4.-]	Ether lipid metabolism	PATH:cel00565
lipid_met_genes_KEGG	C52B9.7	paf-2	K01062 1-alkyl-2-acetylglycerophosphocholine esterase [EC:3.1.1.47]	Ether lipid metabolism	PATH:cel00565
lipid_met_genes_KEGG	T03F6.5	lis-1	K01062 1-alkyl-2-acetylglycerophosphocholine esterase [EC:3.1.1.47]	Ether lipid metabolism	PATH:cel00565
lipid_met_genes_KEGG	F42A9.5	cyp-33E2	K00493 unspecific monooxygenase [EC:1.14.14.1]	Arachidonic acid metabolism	PATH:cel00590
lipid_met_genes_KEGG	C11E4.1		K00432 glutathione peroxidase [EC:1.11.1.9]	Arachidonic acid metabolism	PATH:cel00590
lipid_met_genes_KEGG	C11E4.2		K00432 glutathione peroxidase [EC:1.11.1.9]	Arachidonic acid metabolism	PATH:cel00590
lipid_met_genes_KEGG	F26E4.12		K00432 glutathione peroxidase [EC:1.11.1.9]	Arachidonic acid metabolism	PATH:cel00590
lipid_met_genes_KEGG	R03G5.5		K00432 glutathione peroxidase [EC:1.11.1.9]	Arachidonic acid metabolism	PATH:cel00590
lipid_met_genes_KEGG	R05H10.5		K00432 glutathione peroxidase [EC:1.11.1.9]	Arachidonic acid metabolism	PATH:cel00590
lipid_met_genes_KEGG	C53D5.5		K00681 gamma-glutamyltranspeptidase [EC:2.3.2.2]	Arachidonic acid metabolism	PATH:cel00590
lipid_met_genes_KEGG	T03D8.6		K00681 gamma-glutamyltranspeptidase [EC:2.3.2.2]	Arachidonic acid metabolism	PATH:cel00590
lipid_met_genes_KEGG	Y7A9A.1		K00681 gamma-glutamyltranspeptidase [EC:2.3.2.2]	Arachidonic acid metabolism	PATH:cel00590
lipid_met_genes_KEGG	ZC416.6		K01254 leukotriene-A4 hydrolase [EC:3.3.2.6]	Arachidonic acid metabolism	PATH:cel00590
lipid_met_genes_KEGG	C06B3.4	stdh-1	K00100 steroid dehydrogenase [EC:1.1.1.-]	Linoleic acid metabolism	PATH:cel00591
lipid_met_genes_KEGG	C06B3.5	stdh-3	K00100 steroid dehydrogenase [EC:1.1.1.-]	Linoleic acid metabolism	PATH:cel00591
lipid_met_genes_KEGG	F11A5.12	stdh-2	K00100 steroid dehydrogenase [EC:1.1.1.-]	Linoleic acid metabolism	PATH:cel00591
lipid_met_genes_KEGG	F25G6.5	stdh-4	K00100 steroid dehydrogenase [EC:1.1.1.-]	Linoleic acid metabolism	PATH:cel00591
lipid_met_genes_KEGG	F08A8.4		K00232 acyl-CoA oxidase [EC:1.3.3.10]	α-Linolenic acid metabolism	PATH:cel00592
lipid_met_genes_KEGG	F25C8.1		K00232 acyl-CoA oxidase [EC:1.3.3.11]	α-Linolenic acid metabolism	PATH:cel00592
lipid_met_genes_KEGG	F59F4.1		K00232 acyl-CoA oxidase [EC:1.3.3.12]	α-Linolenic acid metabolism	PATH:cel00592
lipid_met_genes_KEGG	C48B4.1		K00232 acyl-CoA oxidase [EC:1.3.3.6]	α-Linolenic acid metabolism	PATH:cel00592
lipid_met_genes_KEGG	F08A8.1	acox-1	K00232 acyl-CoA oxidase [EC:1.3.3.7]	α-Linolenic acid metabolism	PATH:cel00592
lipid_met_genes_KEGG	F08A8.2		K00232 acyl-CoA oxidase [EC:1.3.3.8]	α-Linolenic acid metabolism	PATH:cel00592
lipid_met_genes_KEGG	F08A8.3		K00232 acyl-CoA oxidase [EC:1.3.3.9]	α-Linolenic acid metabolism	PATH:cel00592
lipid_met_genes_KEGG	F43H9.2	sptl-2	K00654 serine palmitoyltransferase [EC:2.3.1.50]	Sphingolipid metabolism	PATH:cel00600
lipid_met_genes_KEGG	T22G5.5	sptl-3	K00654 serine palmitoyltransferase [EC:2.3.1.50]	Sphingolipid metabolism	PATH:cel00600
lipid_met_genes_KEGG	F33D4.4		K04712 sphingolipid delta-4 desaturase [EC:1.14.-.-]	Sphingolipid metabolism	PATH:cel00600
lipid_met_genes_KEGG	Y54E5A.1	ttm-5	K04712 sphingolipid delta-4 desaturase [EC:1.14.-.-]	Sphingolipid metabolism	PATH:cel00600
lipid_met_genes_KEGG	F53H8.4	sms-2	K04714 shingomyelin synthase [EC:2.7.8.27]	Sphingolipid metabolism	PATH:cel00600
lipid_met_genes_KEGG	H21P03.3	sms-1	K04714 shingomyelin synthase [EC:2.7.8.27]	Sphingolipid metabolism	PATH:cel00600
lipid_met_genes_KEGG	Y22D7AL.8	sms-3	K04714 shingomyelin synthase [EC:2.7.8.27]	Sphingolipid metabolism	PATH:cel00600
lipid_met_genes_KEGG	F59G1.1	cgt-3	K00720 ceramide glucosyltransferase [EC:2.4.1.80]	Sphingolipid metabolism	PATH:cel00600
lipid_met_genes_KEGG	K11D2.2	asah-1	K12348 acid ceramidase [EC:3.5.1.23]	Sphingolipid metabolism	PATH:cel00600
lipid_met_genes_KEGG	B0252.2	asm-1	K12350 sphingomyelin phosphodiesterase [EC:3.1.4.12]	Sphingolipid metabolism	PATH:cel00600
lipid_met_genes_KEGG	W03G1.7	asm-3	K12350 sphingomyelin phosphodiesterase [EC:3.1.4.12]	Sphingolipid metabolism	PATH:cel00600
lipid_met_genes_KEGG	ZK455.4	asm-2	K12350 sphingomyelin phosphodiesterase [EC:3.1.4.12]	Sphingolipid metabolism	PATH:cel00600
lipid_met_genes_KEGG	T27F6.6		K12351 sphingomyelin phosphodiesterase 2 [EC:3.1.4.12]	Sphingolipid metabolism	PATH:cel00600
lipid_met_genes_KEGG	R05D11.9		K12353 sphingomyelin phosphodiesterase 4 [EC:3.1.4.12]	Sphingolipid metabolism	PATH:cel00600
lipid_met_genes_KEGG	T10B11.2		K04715 ceramide kinase [EC:2.7.1.138]	Sphingolipid metabolism	PATH:cel00600
lipid_met_genes_KEGG	Y66H1B.4	spl-1	K01634 sphinganine-1-phosphate aldolase [EC:4.1.2.27]	Sphingolipid metabolism	PATH:cel00600
lipid_met_genes_KEGG	C33C12.3		K01201 glucosylceramidase [EC:3.2.1.45]	Sphingolipid metabolism	PATH:cel00600
lipid_met_genes_KEGG	C33C12.8		K01201 glucosylceramidase [EC:3.2.1.45]	Sphingolipid metabolism	PATH:cel00600
lipid_met_genes_KEGG	F11E6.1		K01201 glucosylceramidase [EC:3.2.1.45]	Sphingolipid metabolism	PATH:cel00600
lipid_met_genes_KEGG	Y4C6B.6		K01201 glucosylceramidase [EC:3.2.1.45]	Sphingolipid metabolism	PATH:cel00600
lipid_met_genes_KEGG	T19B10.3		K12309 beta-galactosidase [EC:3.2.1.23]	Sphingolipid metabolism	PATH:cel00600
lipid_met_genes_KEGG	C29E4.10		K01202 galactosylceramidase [EC:3.2.1.46]	Sphingolipid metabolism	PATH:cel00600
lipid_met_genes_KEGG	F10D2.9	fat-7	K00507 stearoyl-CoA desaturase (delta-9 desaturase) [EC:1.14.19.1]	Biosynthesis of unsaturated fatty acids	PATH:cel01040
lipid_met_genes_KEGG	VZK822L.1	fat-6	K00507 stearoyl-CoA desaturase (delta-9 desaturase) [EC:1.14.19.1]	Biosynthesis of unsaturated fatty acids	PATH:cel01040
lipid_met_genes_KEGG	W06D12.3	fat-5	K00507 stearoyl-CoA desaturase (delta-9 desaturase) [EC:1.14.19.1]	Biosynthesis of unsaturated fatty acids	PATH:cel01040
lipid_met_genes_KEGG	Y67H2A.8	fat-1	K10257 omega-3 fatty acid desaturase (delta-15 desaturase) [EC:1.14.19.-]	Biosynthesis of unsaturated fatty acids	PATH:cel01040
lipid_met_genes_KEGG	T15B7.2	hpo-8	K10703 3-hydroxy acyl-CoA dehydratase [EC:4.2.1.-]	Biosynthesis of unsaturated fatty acids	PATH:cel01040
lipid_met_genes_KEGG	C15F1.6	art-1	K10258 enoyl reductase [EC:1.3.1.-]	Biosynthesis of unsaturated fatty acids	PATH:cel01040
lipid_orthologs_human_KEGG	F10G8.9		paralog of fasn-1, beta-ketoacyl synthase	Fatty acid biosynthesis	PATH:cel00061
lipid_orthologs_human_KEGG	C50D2.9		malonyl-CoA:ACP transacylase	Fatty acid biosynthesis	PATH:cel00061
lipid_orthologs_human_KEGG	T28F3.5		acetyl-CoA carboxylase	Fatty acid biosynthesis	PATH:cel00061
lipid_orthologs_human_KEGG	C31H5.6		palmitoyl-CoA hydrolase activity	Fatty acid elongation	PATH:cel00063
lipid_orthologs_human_KEGG	K05B2.4		long chain acyl-CoA thioesterase I	Fatty acid elongation	PATH:cel00063
lipid_orthologs_human_KEGG	Y71H10A.2	fard-1	acyl-CoA reductase	Fatty acid elongation	PATH:cel00063
lipid_orthologs_human_KEGG	T05E7.1		acyl-CoA thioesterase, long chain	Fatty acid elongation	PATH:cel00063
lipid_orthologs_human_KEGG	W03D8.8		acyl-CoA thioesterase, long chain	Fatty acid elongation	PATH:cel00063
lipid_orthologs_human_KEGG	T10E9.9	acdh-4	acyl CoA dehydrogenase	Fatty acid metabolism	PATH:cel00071
lipid_orthologs_human_KEGG	C55B7.4	acdh-1	acyl-CoA dehydrogenase	Fatty acid metabolism	PATH:cel00071
lipid_orthologs_human_KEGG	F42G9.5	alh-11	aldehyde dehydrogenase	Fatty acid metabolism	PATH:cel00071
lipid_orthologs_human_KEGG	T08B1.3	alh-5	aldehyde dehydrogenase	Fatty acid metabolism	PATH:cel00071
lipid_orthologs_human_KEGG	Y50D4C.2		alcohol dehydrogenase	Fatty acid metabolism	PATH:cel00071
lipid_orthologs_human_KEGG	C17C3.12	acdh-2	short-chain acyl-CoA dehydrogenase	Fatty acid metabolism	PATH:cel00071
lipid_orthologs_human_KEGG	F09E10.3	dhs-25	short-chain dehydrogenase	Fatty acid metabolism	PATH:cel00071
lipid_orthologs_human_KEGG	B0272.4		enoyl-CoA hydratase/isomerase	Fatty acid metabolism	PATH:cel00071
lipid_orthologs_human_KEGG	F52H2.6		ortholog of human gene 3 beta-hydroxysterol delta 24 reductase (DHCR24)	Steroid biosynthesis	PATH:cel00100
lipid_orthologs_human_KEGG	F49E12.10		C-4 sterol methyl oxidase	Steroid biosynthesis	PATH:cel00100
lipid_orthologs_human_KEGG	ZK177.5	cyp-44A1	ortholog of human cholesterol side-chain cleavage enzyme	Steroid biosynthesis	PATH:cel00100
lipid_orthologs_human_KEGG	C17C3.1		acyl-CoA thioesterase	Primary bile acid biosynthesis	PATH:cel00120
lipid_orthologs_human_KEGG	C17C3.3		acyl-CoA thioesterase	Primary bile acid biosynthesis	PATH:cel00120
lipid_orthologs_human_KEGG	C24A3.4		ortholog of human alpha-methylacyl-CoA racemase isoform 3	Primary bile acid biosynthesis	PATH:cel00120
lipid_orthologs_human_KEGG	C37H5.13		ortholog of huaman ACOT-8, acyl-CoA thioesterase	Primary bile acid biosynthesis	PATH:cel00120
lipid_orthologs_human_KEGG	F25E2.3		acyl-CoA thioesterase	Primary bile acid biosynthesis	PATH:cel00120
lipid_orthologs_human_KEGG	F35C8.5		C-4 sterol methyl oxidase	Primary bile acid biosynthesis	PATH:cel00120
lipid_orthologs_human_KEGG	Y87G2A.2		acyl-CoA thioesterase	Primary bile acid biosynthesis	PATH:cel00120
lipid_orthologs_human_KEGG	ZK892.4		orthologous to the human gene alpha-methylacyl-CoA racemase	Primary bile acid biosynthesis	PATH:cel00120
lipid_orthologs_human_KEGG	C10F3.2	dhs-16	short-chain dehydrogenase,dafachronic acids (DA) biosynthesis pathway	Primary bile acid biosynthesis	PATH:cel00120
lipid_orthologs_human_KEGG	E04F6.3	maoc-1	ortholog of human HSD17B4	Primary bile acid biosynthesis	PATH:cel00120
lipid_orthologs_human_KEGG	C04F6.5	dhs-27	paralog of human testosterone 17-beta-dehydrogenase 3	Steroid hormone biosynthesis	PATH:cel00140
lipid_orthologs_human_KEGG	F27D9.6	dhs-29	dehydrogenase	Steroid hormone biosynthesis	PATH:cel00140
lipid_orthologs_human_KEGG	F35B12.2	dhs-20	dehydrogenase	Steroid hormone biosynthesis	PATH:cel00140
lipid_orthologs_human_KEGG	F55A12.4	dhs-2	short-chain dehydrogenase	Steroid hormone biosynthesis	PATH:cel00140
lipid_orthologs_human_KEGG	F56D1.5	dhs-5	steroid dehydrogenase	Steroid hormone biosynthesis	PATH:cel00140
lipid_orthologs_human_KEGG	Y39A1A.11	dhs-11	short-chain dehydrogenase	Steroid hormone biosynthesis	PATH:cel00140
lipid_orthologs_human_KEGG	F19H6.4		3-oxo-5-alpha-steroid 4-dehydrogenase	Steroid hormone biosynthesis	PATH:cel00140
lipid_orthologs_human_KEGG	F42F12.3		3-oxo-5-alpha-steroid 4-dehydrogenase	Steroid hormone biosynthesis	PATH:cel00140
lipid_orthologs_human_KEGG	F55E10.6		short-chain dehydrogenase	Steroid hormone biosynthesis	PATH:cel00140
lipid_orthologs_human_KEGG	ZK1251.3		steroid reductase	Steroid hormone biosynthesis	PATH:cel00140
lipid_orthologs_human_KEGG	Y57A10C.6	daf-22	ortholog of human sterol carrier protein SCP2	Steroid hormone biosynthesis	PATH:cel00140
lipid_orthologs_human_KEGG	B0024.13		ortholog of human SRD5A3	Steroid hormone biosynthesis	PATH:cel00140
lipid_orthologs_human_KEGG	Y57E12B.3	lipl-6	paralog of lipl-4	Glycerolipid metabolism	PATH:cel00561
lipid_orthologs_human_KEGG	ZK6.7	lipl-5	paralog of lipl-4	Glycerolipid metabolism	PATH:cel00561
lipid_orthologs_human_KEGG	C13B9.2		paralogy of human isoform 2 of Glycerate kinase	Glycerolipid metabolism	PATH:cel00561
lipid_orthologs_human_KEGG	F46H6.2	dgk-2	diacylglycerol kinase	Glycerolipid metabolism	PATH:cel00561
lipid_orthologs_human_KEGG	F53C3.13		phosphatidic acid phosphatase type 2	Glycerolipid metabolism	PATH:cel00561
lipid_orthologs_human_KEGG	M79.2		paralog of acl-4 and acl-5,glycerol acyltransferase	Glycerolipid metabolism	PATH:cel00561
lipid_orthologs_human_KEGG	T28D9.3		phosphatidic acid phosphatase type 2	Glycerolipid metabolism	PATH:cel00561
lipid_orthologs_human_KEGG	F01G10.7	lipl-7	paralog of lipl-4	Glycerolipid metabolism	PATH:cel00561
lipid_orthologs_human_KEGG	F46B6.8	lipl-2	paralog of lipl-4	Glycerolipid metabolism	PATH:cel00561
lipid_orthologs_human_KEGG	F54F3.3	lipl-1	paralog of lipl-4	Glycerolipid metabolism	PATH:cel00561
lipid_orthologs_human_KEGG	K04A8.5	lipl-4	triglyceride lipase	Glycerolipid metabolism	PATH:cel00561
lipid_orthologs_human_KEGG	R11G11.14	lipl-3	paralog of lipl-4	Glycerolipid metabolism	PATH:cel00561
lipid_orthologs_human_KEGG	Y50E8A.7	lipl-8	paralog of lipl-4	Glycerolipid metabolism	PATH:cel00561
lipid_orthologs_human_KEGG	C05D11.7	tagl	patatin/phospholipaseA2-related	Glycerolipid metabolism	PATH:cel00561
lipid_orthologs_human_KEGG	F59A1.10		acyl-CoA:diacylglycerol acyltransferase (DGAT) [KOG0831]	Glycerolipid metabolism	PATH:cel00561
lipid_orthologs_human_KEGG	K07B1.4		acyl-CoA:diacylglycerol acyltransferase (DGAT) [KOG0831]	Glycerolipid metabolism	PATH:cel00561
lipid_orthologs_human_KEGG	W01A11.2	dgtr-1	acyl-CoA:diacylglycerol acyltransferase (DGAT) [KOG0831]	Glycerolipid metabolism	PATH:cel00561
lipid_orthologs_human_KEGG	Y53G8B.2		acyl-CoA:diacylglycerol acyltransferase (DGAT) [KOG0831]	Glycerolipid metabolism	PATH:cel00561
lipid_orthologs_human_KEGG	C07D8.5		ortholog of human AKR1A1	Glycerolipid metabolism	PATH:cel00561
lipid_orthologs_human_KEGG	ZK550.1	mboa-5	putative transmembrane O-acyl transferase (MBOAT)	Glycerophospholipid metabolism	PATH:cel00564
lipid_orthologs_human_KEGG	R07B7.9		lipase	Glycerophospholipid metabolism	PATH:cel00564
lipid_orthologs_human_KEGG	T19D7.7		lipase, GDSL	Glycerophospholipid metabolism	PATH:cel00564
lipid_orthologs_human_KEGG	Y50E8A.6		putative mitochondrial glycerol-3-phosphate dehydrogenase	Glycerophospholipid metabolism	PATH:cel00564
lipid_orthologs_human_KEGG	Y65B4BR.1		ortholog of human phospholipase B1	Glycerophospholipid metabolism	PATH:cel00564
lipid_orthologs_human_KEGG	Y69A2AL.2		phospholipase A2	Glycerophospholipid metabolism	PATH:cel00564
lipid_orthologs_human_KEGG	Y73B6BL.37		lipase	Glycerophospholipid metabolism	PATH:cel00564
lipid_orthologs_human_KEGG	B0285.9	ckb-2	encodes an isoform of choline kinase	Glycerophospholipid metabolism	PATH:cel00564
lipid_orthologs_human_KEGG	C28D4.2	cka-1	encodes an isoform of choline kinase	Glycerophospholipid metabolism	PATH:cel00564
lipid_orthologs_human_KEGG	F22F7.5	ckb-4	choline/ethanolamine kinase	Glycerophospholipid metabolism	PATH:cel00564
lipid_orthologs_human_KEGG	Y49A3A.1		choline/ethanolaminephosphotransferase choline phosphotransferase 1	Glycerophospholipid metabolism	PATH:cel00564
lipid_orthologs_human_KEGG	C08F8.4	mboa-4	O-acyl transferase (MBOAT)	Glycerophospholipid metabolism	PATH:cel00564
lipid_orthologs_human_KEGG	C40C9.5	nlg-1	paralog of ace-1,ace-2 and ace-3	Glycerophospholipid metabolism	PATH:cel00564
lipid_orthologs_human_KEGG	F09C8.1		ortholog of human Phospholipase B1	Glycerophospholipid metabolism	PATH:cel00564
lipid_orthologs_human_KEGG	F13H8.11		ortholog of human phospholipase B1	Glycerophospholipid metabolism	PATH:cel00564
lipid_orthologs_human_KEGG	F36A2.9		lipase	Glycerophospholipid metabolism	PATH:cel00564
lipid_orthologs_human_KEGG	F47A4.5		Ca2+-independent phospholipase A2	Glycerophospholipid metabolism	PATH:cel00564
lipid_orthologs_human_KEGG	R07B7.8		lipase	Glycerophospholipid metabolism	PATH:cel00564
lipid_orthologs_human_KEGG	T27E9.5	pssy-2	phosphatidyl serine synthase	Glycerophospholipid metabolism	PATH:cel00564
lipid_orthologs_human_KEGG	W02B12.1		lipase	Glycerophospholipid metabolism	PATH:cel00564
lipid_orthologs_human_KEGG	Y48B6A.8	ace-3	acetylcholinesterase (AChE)	Glycerophospholipid metabolism	PATH:cel00564
lipid_orthologs_human_KEGG	C01C10.3	acl-12	paralog of acl-8 and acl-9	Glycerophospholipid metabolism	PATH:cel00564
lipid_orthologs_human_KEGG	F08G5.2	acl-13	paralog of acl-8 and acl-9	Glycerophospholipid metabolism	PATH:cel00564
lipid_orthologs_human_KEGG	F55A11.5	bus-18	lysocardiolipin acyltransferase	Glycerophospholipid metabolism	PATH:cel00564
lipid_orthologs_human_KEGG	B0285.10	ckb-3	a putative choline kinase	Glycerophospholipid metabolism	PATH:cel00564
lipid_orthologs_human_KEGG	B0285.8	ckb-1	a putative choline kinase	Glycerophospholipid metabolism	PATH:cel00564
lipid_orthologs_human_KEGG	F28A10.10		paralogy of pcyt-1,cytidylyltransferase	Glycerophospholipid metabolism	PATH:cel00564
lipid_orthologs_human_KEGG	Y18H1A.11		paralogy of pcyt-2,cytidylyltransferase	Glycerophospholipid metabolism	PATH:cel00564
lipid_orthologs_human_KEGG	C27A7.3		Type I phosphodiesterase/nucleotide pyrophosphatase	Ether lipid metabolism	PATH:cel00565
lipid_orthologs_human_KEGG	F13H10.5		type I phosphodiesterase/nucleotide pyrophosphatase	Ether lipid metabolism	PATH:cel00565
lipid_orthologs_human_KEGG	W03G9.6	paf-1	type II platelet-activating factor-acetylhydrolase (PAF-AH)	Ether lipid metabolism	PATH:cel00565
lipid_orthologs_human_KEGG	C27A7.1		ortholog of the human gene NPPASE	Ether lipid metabolism	PATH:cel00565
lipid_orthologs_human_KEGG	C26F1.2	cyp-32A1	ortholog of human leukotriene-B(4) omega-hydroxylase 1	Arachidonic acid metabolism	PATH:cel00590
lipid_orthologs_human_KEGG	C42C1.11		bifunctional leukotriene A4 hydrolase/aminopeptidase LTA4H	Arachidonic acid metabolism	PATH:cel00590
lipid_orthologs_human_KEGG	F01D5.9	cyp-37A1	paralog of human CYP4A11	Arachidonic acid metabolism	PATH:cel00590
lipid_orthologs_human_KEGG	F40G12.9		gamma-glutamyltransferase	Arachidonic acid metabolism	PATH:cel00590
lipid_orthologs_human_KEGG	R11A8.5		glutathione S-transferase-related protein	Arachidonic acid metabolism	PATH:cel00590
lipid_orthologs_human_KEGG	R11G1.3	gst-11	glutathione S-transferase	Arachidonic acid metabolism	PATH:cel00590
lipid_orthologs_human_KEGG	T19H12.6		gamma-glutamyltranspeptidase	Arachidonic acid metabolism	PATH:cel00590
lipid_orthologs_human_KEGG	Y5H2B.5	cyp-32B1	ortholog of human leukotriene-B(4) omega-hydroxylase 1	Arachidonic acid metabolism	PATH:cel00590
lipid_orthologs_human_KEGG	Y94H6A.4		glutathione peroxidase	Arachidonic acid metabolism	PATH:cel00590
lipid_orthologs_human_KEGG	F28G4.1	cyp-37B1	paralog of human CYP4A11	Arachidonic acid metabolism	PATH:cel00590
lipid_orthologs_human_KEGG	K02F3.6	ceeh-1	epoxide hydrolase (sEH)	Arachidonic acid metabolism	PATH:cel00590
lipid_orthologs_human_KEGG	T19B10.1	cyp-29A2	oxidoreductase	Arachidonic acid metabolism	PATH:cel00590
lipid_orthologs_human_KEGG	Y38C9B.1	cyp-29A3	ortholog of human leukotriene-B(4) omega-hydroxylase 1	Arachidonic acid metabolism	PATH:cel00590
lipid_orthologs_human_KEGG	B0331.1	cyp-29A4	ortholog of human leukotriene-B4 20-monooxygenase	Arachidonic acid metabolism	PATH:cel00590
lipid_orthologs_human_KEGG	C36A4.1	cyp-25A1	ortholog of huamn CYP3A4	Linoleic acid metabolism	PATH:cel00591
lipid_orthologs_human_KEGG	C36A4.2	cyp-25A2	ortholog of huamn CYP3A4	Linoleic acid metabolism	PATH:cel00591
lipid_orthologs_human_KEGG	C36A4.3	cyp-25A3	ortholog of huamn CYP3A4	Linoleic acid metabolism	PATH:cel00591
lipid_orthologs_human_KEGG	C36A4.6	cyp-25A4	ortholog of huamn CYP3A4	Linoleic acid metabolism	PATH:cel00591
lipid_orthologs_human_KEGG	F42A6.4	cyp-25A5	ortholog of huamn CYP3A4	Linoleic acid metabolism	PATH:cel00591
lipid_orthologs_human_KEGG	K06B9.1	cyp-25A6	ortholog of huamn CYP3A4	Linoleic acid metabolism	PATH:cel00591
lipid_orthologs_human_KEGG	F02C12.5	cyp-13B1	ortholog of huamn CYP3A4	Linoleic acid metabolism	PATH:cel00591
lipid_orthologs_human_KEGG	F14F7.2	cyp-13A11	ortholog of huamn CYP3A4	Linoleic acid metabolism	PATH:cel00591
lipid_orthologs_human_KEGG	F14F7.3	cyp-13A12	ortholog of huamn CYP3A4	Linoleic acid metabolism	PATH:cel00591
lipid_orthologs_human_KEGG	K06G5.2	cyp-13B2	ortholog of huamn CYP3A4	Linoleic acid metabolism	PATH:cel00591
lipid_orthologs_human_KEGG	T10B9.1	cyp-13A4	ortholog of huamn CYP3A4	Linoleic acid metabolism	PATH:cel00591
lipid_orthologs_human_KEGG	T10B9.10	cyp-13A7	ortholog of huamn CYP3A4	Linoleic acid metabolism	PATH:cel00591
lipid_orthologs_human_KEGG	T10B9.2	cyp-13A5	ortholog of huamn CYP3A4	Linoleic acid metabolism	PATH:cel00591
lipid_orthologs_human_KEGG	T10B9.3	cyp-13A6	ortholog of huamn CYP3A4	Linoleic acid metabolism	PATH:cel00591
lipid_orthologs_human_KEGG	T10B9.4	cyp-13A8	ortholog of huamn CYP3A4	Linoleic acid metabolism	PATH:cel00591
lipid_orthologs_human_KEGG	T10B9.5	cyp-13A3	ortholog of huamn CYP3A4	Linoleic acid metabolism	PATH:cel00591
lipid_orthologs_human_KEGG	T10B9.7	cyp-13A2	ortholog of huamn CYP3A4	Linoleic acid metabolism	PATH:cel00591
lipid_orthologs_human_KEGG	ZK1320.4	cyp-13A10	ortholog of huamn CYP3A4	Linoleic acid metabolism	PATH:cel00591
lipid_orthologs_human_KEGG	T10B9.8	cyp-13A1	ortholog of huamn CYP3A4	Linoleic acid metabolism	PATH:cel00591
lipid_orthologs_human_KEGG	D1014.1	sul-2	sulfatase	Sphingolipid metabolism	PATH:cel00600
lipid_orthologs_human_KEGG	F01E11.1	ugt-57	UDP-glucuronosyl transferase	Sphingolipid metabolism	PATH:cel00600
lipid_orthologs_human_KEGG	F27E5.1		choloylglycine hydrolase	Sphingolipid metabolism	PATH:cel00600
lipid_orthologs_human_KEGG	F35H8.6	ugt-58	UDP-glucuronosyl transferase	Sphingolipid metabolism	PATH:cel00600
lipid_orthologs_human_KEGG	F54C1.1		UDP-glucuronosyl	Sphingolipid metabolism	PATH:cel00600
lipid_orthologs_human_KEGG	H22K11.2		glycoside hydrolase, family 35	Sphingolipid metabolism	PATH:cel00600
lipid_orthologs_human_KEGG	R07B7.11	gana-1	alpha-galactosidase (alpha-GAL)	Sphingolipid metabolism	PATH:cel00600
lipid_orthologs_human_KEGG	W02B12.11		UDP-gal:glucosylceramide beta-1,4-galactosyltransferase	Sphingolipid metabolism	PATH:cel00600
lipid_orthologs_human_KEGG	W02F12.2		alkaline ceramidase	Sphingolipid metabolism	PATH:cel00600
lipid_orthologs_human_KEGG	W07E6.3		phosphatidylcholine:ceramide cholinephosphotransferase 2	Sphingolipid metabolism	PATH:cel00600
lipid_orthologs_human_KEGG	Y104H12D.3		glutamate decarboxylase/sphingosine phosphate lyase	Sphingolipid metabolism	PATH:cel00600
lipid_orthologs_human_KEGG	C23H3.4	sptl-1	serine palmitoyltransferase	Sphingolipid metabolism	PATH:cel00600
lipid_orthologs_human_KEGG	F20B4.6	cgt-2	ceramide glucosyltransferase	Sphingolipid metabolism	PATH:cel00600
lipid_orthologs_human_KEGG	T06C12.10	cgt-1	ceramide glucosyltransferase	Sphingolipid metabolism	PATH:cel00600
lipid_orthologs_human_KEGG	C34C6.5	sphk-1	sphingosine kinase	Sphingolipid metabolism	PATH:cel00600
lipid_orthologs_human_KEGG	B0222.4	tag-38	glutamate decarboxylase/sphingosine phosphate lyase	Sphingolipid metabolism	PATH:cel00600
lipid_orthologs_human_KEGG	C01B10.9		ectonucleotide pyrophosphatase/phosphodiesterase 7	Sphingolipid metabolism	PATH:cel00600
lipid_orthologs_human_KEGG	W08D2.4	fat-3	delta-6 fatty acid desaturase	Biosynthesis of unsaturated fatty acids	PATH:cel01040
lipid_orthologs_human_KEGG	T13F2.1	fat-4	delta-5 fatty acid desaturase	Biosynthesis of unsaturated fatty acids	PATH:cel01040
lipid_orthologs_human_KEGG	C40H1.4	elo-4	polyunsaturated fatty acid (PUFA) elongase	unclear	NA
lipid_orthologs_human_KEGG	D2024.3	elo-3	polyunsaturated fatty acid (PUFA) elongase	unclear	NA
lipid_orthologs_human_KEGG	Y53F4B.2	elo-9	polyunsaturated fatty acid (PUFA) elongase	unclear	NA
lipid_metabolism_wormbase	F40F4.2	lbp-2	small intracellular fatty acid binding proteins (iFABPs)	Fatty acid biosynthesis	PATH:cel00061
lipid_metabolism_wormbase	F40F4.3	lbp-1	fatty acid binding protein (FABP)	Fatty acid biosynthesis	PATH:cel00061
lipid_metabolism_wormbase	F40F4.4	lbp-3	fatty acid binding protein (FABP)	Fatty acid biosynthesis	PATH:cel00061
lipid_metabolism_wormbase	T22G5.2	lbp-7	intracellular fatty acid binding protein (iFABP)	Fatty acid biosynthesis	PATH:cel00061
lipid_metabolism_wormbase	T22G5.6	lbp-8	intracellular fatty acid binding protein (FABPs)	Fatty acid biosynthesis	PATH:cel00061
lipid_metabolism_wormbase	W02D3.5	lbp-6	intracellular fatty acid binding protein (iFABP)	Fatty acid biosynthesis	PATH:cel00061
lipid_metabolism_wormbase	W02D3.7	lbp-5	intracellular fatty acid binding protein (iFABP)	Fatty acid biosynthesis	PATH:cel00061
lipid_metabolism_wormbase	Y40B10A.1	lbp-9	intracellular fatty acid binding protein (iFABP)	Fatty acid biosynthesis	PATH:cel00061
lipid_metabolism_wormbase	ZK742.5	lbp-4	fatty acid binding protein	Fatty acid biosynthesis	PATH:cel00061
lipid_metabolism_wormbase	F41H10.7	elo-5	polyunsaturated fatty acid (PUFA) elongase	Fatty acid biosynthesis	PATH:cel00061
lipid_metabolism_wormbase	F41H10.8	elo-6	polyunsaturated fatty acid (PUFA) elongase	Fatty acid biosynthesis	PATH:cel00061
lipid_metabolism_wormbase	Y56A3A.19		acyl carrier protein (ACP)	Fatty acid biosynthesis	PATH:cel00061
lipid_metabolism_wormbase	EEED8.2		cytosolic fatty-acid binding	Fatty acid biosynthesis	PATH:cel00061
lipid_metabolism_wormbase	EEED8.3		fatty acid-binding protein	Fatty acid biosynthesis	PATH:cel00061
lipid_metabolism_wormbase	F09F3.9	cpt-5	carnitine palmitoyl transferase	Fatty acid metabolism	PATH:cel00071
lipid_metabolism_wormbase	Y48G9A.10	cpt-3	carnitine palmitoyl transferase	Fatty acid metabolism	PATH:cel00071
lipid_metabolism_wormbase	F28A10.6	acdh-9	acyl-CoA dehydrogenase	Fatty acid metabolism	PATH:cel00071
lipid_metabolism_wormbase	D1009.1	acs-22	very long chain fatty acid acyl-CoA synthetase	Fatty acid metabolism	PATH:cel00071
lipid_metabolism_wormbase	F28D1.9	acs-20	very long chain fatty acid acyl-CoA synthetase	Fatty acid metabolism	PATH:cel00071
lipid_metabolism_wormbase	F41C3.3	acs-11	acyl-CoA synthase	Fatty acid metabolism	PATH:cel00071
lipid_metabolism_wormbase	F46E10.1	acs-1	acyl-CoA synthase	Fatty acid metabolism	PATH:cel00071
lipid_metabolism_wormbase	W01A11.5	cpt-6	carnitine palmitoyl transferase	Fatty acid metabolism	PATH:cel00071
lipid_metabolism_wormbase	F13D12.9		CFA/mycolic acid synthase	Fatty acid metabolism	PATH:cel00071
lipid_metabolism_wormbase	F38H4.8	ech-2	enoyl-CoA hydratase	Fatty acid metabolism	PATH:cel00071
lipid_metabolism_wormbase	F01G4.2	ard-1	3-hydroxyacyl-CoA dehydrogenase	Fatty acid metabolism	PATH:cel00071
lipid_metabolism_wormbase	K11D12.4	cpt-4	carnitine palmitoyl transferase	Fatty acid metabolism	PATH:cel00071
lipid_metabolism_wormbase	ZK1127.2	acs-6	fatty Acid CoA Synthetase	Fatty acid metabolism	PATH:cel00071
lipid_metabolism_wormbase	C01G6.7	acs-7	fatty Acid CoA Synthetase	Fatty acid metabolism	PATH:cel00071
lipid_metabolism_wormbase	C52B9.9	acs-8	4-coumarate coA ligase	Fatty acid metabolism	PATH:cel00071
lipid_metabolism_wormbase	T20F7.7	acs-9	fatty Acid CoA Synthetase	Fatty acid metabolism	PATH:cel00071
lipid_metabolism_wormbase	AH10.1	acs-10	fatty Acid CoA Synthetase	Fatty acid metabolism	PATH:cel00071
lipid_metabolism_wormbase	F25C8.4	acs-12	fatty Acid CoA Synthetase	Fatty acid metabolism	PATH:cel00071
lipid_metabolism_wormbase	F11A3.1	acs-14	fatty Acid CoA Synthetase	Fatty acid metabolism	PATH:cel00071
lipid_metabolism_wormbase	C36A4.9	acs-19	fatty Acid CoA Synthetase	Fatty acid metabolism	PATH:cel00071
lipid_metabolism_wormbase	C50H11.1	acs-21	fatty Acid CoA Synthetase	Fatty acid metabolism	PATH:cel00071
lipid_metabolism_wormbase	Y45F3A.3	acdh-11	Very-long-chain acyl-CoA dehydrogenase	Fatty acid metabolism	PATH:cel00071
lipid_metabolism_wormbase	C28C12.9	acdh-13	Very-long-chain acyl-CoA dehydrogenase	Fatty acid metabolism	PATH:cel00071
lipid_metabolism_wormbase	C37A2.3	acdh-5	acyl-CoA dehydrogenase	Fatty acid metabolism	PATH:cel00071
lipid_metabolism_wormbase	C02D5.1	acdh-6	acyl-CoA dehydrogenase	Fatty acid metabolism	PATH:cel00071
lipid_metabolism_wormbase	C05C9.1		lipid-binding serum glycoprotein, cholesteryl ester transfer protein	Steroid biosynthesis	PATH:cel00100
lipid_metabolism_wormbase	F55B12.5	nrf-5	cholesterol-ester-binding protein	Steroid biosynthesis	PATH:cel00100
lipid_metabolism_wormbase	R148.6	heh-1	orthologous to human NPC2	Steroid biosynthesis	PATH:cel00100
lipid_metabolism_wormbase	F02E8.6	ncr-1	cholesterol transport protein	Steroid biosynthesis	PATH:cel00100
lipid_metabolism_wormbase	F09G8.4	ncr-2	cholesterol transport protein	Steroid biosynthesis	PATH:cel00100
lipid_metabolism_wormbase	C25A1.5		fatty acid hydroxylase, C-5 sterol desaturase and C-4 sterol methyl oxidase	Steroid biosynthesis	PATH:cel00100
lipid_metabolism_wormbase	F08F8.2		HMG-CoA reductase	Steroid biosynthesis	PATH:cel00100
lipid_metabolism_wormbase	T13C5.1	daf-9	steroidogenic or fatty acid hydroxylase	Steroid hormone biosynthesis	PATH:cel00140
lipid_metabolism_wormbase	C46C11.1	hosl-1	ortholog of hormone-sensitive lipase (LIPE)	Glycerolipid metabolism	PATH:cel00561
lipid_metabolism_wormbase	C04B4.3	lips-2	lipase	Glycerolipid metabolism	PATH:cel00561
lipid_metabolism_wormbase	C09E8.2	lips-7	lipase	Glycerolipid metabolism	PATH:cel00561
lipid_metabolism_wormbase	F10F2.3	lips-3	lipase	Glycerolipid metabolism	PATH:cel00561
lipid_metabolism_wormbase	F14E5.5	lips-10	lipase	Glycerolipid metabolism	PATH:cel00561
lipid_metabolism_wormbase	F31F6.7	lips-8	lipase	Glycerolipid metabolism	PATH:cel00561
lipid_metabolism_wormbase	F45E6.4	lips-1	lipase	Glycerolipid metabolism	PATH:cel00561
lipid_metabolism_wormbase	F58G1.5	lips-9	lipase	Glycerolipid metabolism	PATH:cel00561
lipid_metabolism_wormbase	H17B01.3	lips-14	lipase	Glycerolipid metabolism	PATH:cel00561
lipid_metabolism_wormbase	K12B6.3	lips-4	lipase	Glycerolipid metabolism	PATH:cel00561
lipid_metabolism_wormbase	R07G3.2	lips-17	lipase	Glycerolipid metabolism	PATH:cel00561
lipid_metabolism_wormbase	T01C3.4	fil-1	lipase	Glycerolipid metabolism	PATH:cel00561
lipid_metabolism_wormbase	T12A7.4	lips-5	lipase	Glycerolipid metabolism	PATH:cel00561
lipid_metabolism_wormbase	Y38E10A.10	lips-16	lipase	Glycerolipid metabolism	PATH:cel00561
lipid_metabolism_wormbase	Y38E10A.7	lips-15	lipase	Glycerolipid metabolism	PATH:cel00561
lipid_metabolism_wormbase	ZK617.2	lips-6	lipase	Glycerolipid metabolism	PATH:cel00561
lipid_metabolism_wormbase	Y49E10.16		lipase	Glycerolipid metabolism	PATH:cel00561
lipid_metabolism_wormbase	T13B5.5	lips-11	Triacylglycerol lipase	Glycerolipid metabolism	PATH:cel00561
lipid_metabolism_wormbase	T13B5.6	lips-12	Triacylglycerol lipase	Glycerolipid metabolism	PATH:cel00561
lipid_metabolism_wormbase	T13B5.7	lips-13	LIPaSe related	Glycerolipid metabolism	PATH:cel00561
lipid_metabolism_wormbase	C54D1.4	alh-10	aldehyde dehydrogenase	Glycerolipid metabolism	PATH:cel00561
lipid_metabolism_wormbase	F36H1.6	alh-3	aldehyde dehydrogenase	Glycerolipid metabolism	PATH:cel00561
lipid_metabolism_wormbase	F56D12.1	alh-6	aldehyde dehydrogenase	Glycerolipid metabolism	PATH:cel00561
lipid_metabolism_wormbase	F45H10.1	alh-7	aldehyde dehydrogenase	Glycerolipid metabolism	PATH:cel00561
lipid_metabolism_wormbase	F13D12.4	alh-8	aldehyde dehydrogenase	Glycerolipid metabolism	PATH:cel00561
lipid_metabolism_wormbase	D1044.1		choline/ethanolamine kinase	Glycerophospholipid metabolism	PATH:cel00564
lipid_metabolism_wormbase	D1037.5		patatin/phospholipaseA2-rel	Glycerophospholipid metabolism	PATH:cel00564
lipid_metabolism_wormbase	H23L24.2		patatin/phospholipaseA2-rel	Glycerophospholipid metabolism	PATH:cel00564
lipid_metabolism_wormbase	C49F5.1	sams-1	S-adenosyl methionine synthetase	Glycerophospholipid metabolism	PATH:cel00564
lipid_metabolism_wormbase	T05C3.6		phospholipase D3/Transphosphatidylase	Glycerophospholipid metabolism	PATH:cel00564
lipid_metabolism_wormbase	F53B3.2		O-methyltransferase [KOG1663]	Glycerophospholipid metabolism	PATH:cel00564
lipid_metabolism_wormbase	Y40B10A.6		O-methyltransferase [KOG1663]	Glycerophospholipid metabolism	PATH:cel00564
lipid_metabolism_wormbase	H37A05.1	lpin-1	putative phosphatidic acid phosphatase	Glycerophospholipid metabolism	PATH:cel00564
lipid_metabolism_wormbase	K12H4.5		phosphatidylserine decarboxylase	Glycerophospholipid metabolism	PATH:cel00564
lipid_metabolism_wormbase	Y40B10A.2		O-methyltransferase [KOG1663]	Glycerophospholipid metabolism	PATH:cel00564
lipid_metabolism_wormbase	Y40B10A.7		O-methyltransferase	Glycerophospholipid metabolism	PATH:cel00564
lipid_metabolism_wormbase	F28B3.9	acl-11	paralog of acl-8 and acl-9	Glycerophospholipid metabolism	PATH:cel00564
lipid_metabolism_wormbase	B0395.3		orthologous to the human gene choline acetyltransferase isoform R	Glycerophospholipid metabolism	PATH:cel00564
lipid_metabolism_wormbase	F41E7.6		acyltransferase ChoActase	Glycerophospholipid metabolism	PATH:cel00564
lipid_metabolism_wormbase	T20B3.1		acyltransferase ChoActase	Glycerophospholipid metabolism	PATH:cel00564
lipid_metabolism_wormbase	B0348.4	egl-8	phospholipase C	Glycerophospholipid metabolism	PATH:cel00564
lipid_metabolism_wormbase	M03A1.6	ipla-1	phospholipase A2	Glycerophospholipid metabolism	PATH:cel00564
lipid_metabolism_wormbase	F31B12.1	plc-1	phospholipase C	Glycerophospholipid metabolism	PATH:cel00564
lipid_metabolism_wormbase	Y75B12B.6	plc-2	phospholipase C	Glycerophospholipid metabolism	PATH:cel00564
lipid_metabolism_wormbase	T01E8.3	plc-3	phospholipase C	Glycerophospholipid metabolism	PATH:cel00564
lipid_metabolism_wormbase	R05G6.8	plc-4	phospholipase C	Glycerophospholipid metabolism	PATH:cel00564
lipid_metabolism_wormbase	K10F12.3	pll-1	phospholipase C	Glycerophospholipid metabolism	PATH:cel00564
lipid_metabolism_wormbase	C03G6.14	cyp-35A1	cholesterol 7-alpha-monooxygenase-type	Arachidonic acid metabolism	PATH:cel00590
lipid_metabolism_wormbase	C03G6.15	cyp-35A2	cholesterol 7-alpha-monooxygenase-type	Arachidonic acid metabolism	PATH:cel00590
lipid_metabolism_wormbase	C49G7.8	cyp-35A4	cholesterol 7-alpha-monooxygenase-type	Arachidonic acid metabolism	PATH:cel00590
lipid_metabolism_wormbase	K07C6.5	cyp-35A5	cholesterol 7-alpha-monooxygenase-type	Arachidonic acid metabolism	PATH:cel00590
lipid_metabolism_wormbase	K07C5.5	ceeh-2	epoxide hydrolase (sEH) orthologous to human ABHD7 and ABHD9	Arachidonic acid metabolism	PATH:cel00590
lipid_metabolism_wormbase	C09G4.1	hyl-1	ceramide synthase	Sphingolipid metabolism	PATH:cel00600
lipid_metabolism_wormbase	K02G10.6	hyl-2	ceramide synthase	Sphingolipid metabolism	PATH:cel00600
lipid_metabolism_wormbase	Y6B3B.10	lagr-1	ceramide synthase	Sphingolipid metabolism	PATH:cel00600
lipid_metabolism_wormbase	F11E6.5	elo-2	polyunsaturated fatty acid (PUFA) elongase	Biosynthesis of unsaturated fatty acids	PATH:cel01040
lipid_metabolism_wormbase	F56H11.4	elo-1	polyunsaturated fatty acid (PUFA) elongase	Biosynthesis of unsaturated fatty acids	PATH:cel01040
lipid_metabolism_wormbase	W02A2.1	fat-2	delta-12 fatty acyl desaturase	Biosynthesis of unsaturated fatty acids	PATH:cel01040
lipid_metabolism_wormbase	F56H11.3	elo-7	polyunsaturated fatty acid (PUFA) elongase	unclear	NA
lipid_metabolism_wormbase	Y47D3A.30	elo-8	polyunsaturated fatty acid (PUFA) elongase	unclear	NA
lipid_metabolism_wormbase	C04E12.7	scrm-3	scramblase	unclear	NA
lipid_metabolism_wormbase	F11A6.2	scrm-4	scramblase	unclear	NA
lipid_metabolism_wormbase	F46A8.10	scrm-6	scramblase	unclear	NA
lipid_metabolism_wormbase	K08D10.7	scrm-8	scramblase	unclear	NA
lipid_metabolism_wormbase	K08D10.8	scrm-5	scramblase	unclear	NA
lipid_metabolism_wormbase	T22H2.5	scrm-1	scramblase	unclear	NA
lipid_metabolism_wormbase	Y50E8A.9	scrm-7	scramblase	unclear	NA
lipid_metabolism_wormbase	ZK1053.5	scrm-2	scramblase	unclear	NA
lipid_metabolism_wormbase	K07C6.4	cyp-35B1	cytochrome P450 CYP2 subfamily	unclear	NA
lipid_metabolism_wormbase	H02I12.8	cyp-31A2	hydroxylate polyunsaturated fats	unclear	NA
lipid_metabolism_wormbase	Y17G9B.3	cyp-31A3	involved in the production of lipid(s) required for eggshell formation	unclear	NA
lipid_metabolism_wormbase	M03A8.1	dhs-28	SCP2 sterol-binding domain	unclear	NA
lipid_metabolism_wormbase	T02E1.5	dhs-3	short-chain dehydrogenases/reductase	unclear	NA
lipid_metabolism_wormbase	C01G8.3	dhs-1	Dehydrogenases	unclear	NA
lipid_metabolism_wormbase	K08F4.9	dhs-12	Dehydrogenases	unclear	NA
lipid_metabolism_wormbase	F36H9.3	dhs-13	Dehydrogenases	unclear	NA
lipid_metabolism_wormbase	R05D8.8	dhs-14	Dehydrogenases	unclear	NA
lipid_metabolism_wormbase	R05D8.10	dhs-15	Dehydrogenases	unclear	NA
lipid_metabolism_wormbase	F29G9.6	dhs-17	Dehydrogenases	unclear	NA
lipid_metabolism_wormbase	C45B11.3	dhs-18	Dehydrogenases	unclear	NA
lipid_metabolism_wormbase	T11F9.11	dhs-19	Dehydrogenases	unclear	NA
lipid_metabolism_wormbase	R11D1.11	dhs-21	Dehydrogenases	unclear	NA
lipid_metabolism_wormbase	C15H11.4	dhs-22	Dehydrogenases	unclear	NA
lipid_metabolism_wormbase	R08H2.1	dhs-23	Dehydrogenases	unclear	NA
lipid_metabolism_wormbase	Y60A3A.10	dhs-24	Dehydrogenases	unclear	NA
lipid_metabolism_wormbase	ZK816.5	dhs-26	Dehydrogenases	unclear	NA
lipid_metabolism_wormbase	T25G12.7	dhs-30	Dehydrogenases	unclear	NA
lipid_metabolism_wormbase	T04B2.6	dhs-31	Dehydrogenases	unclear	NA
lipid_metabolism_wormbase	T05F1.10	dhs-4	Dehydrogenases	unclear	NA
lipid_metabolism_wormbase	C17G10.8	dhs-6	Dehydrogenases	unclear	NA
lipid_metabolism_wormbase	E04F6.7	dhs-7	Dehydrogenases	unclear	NA
lipid_metabolism_wormbase	K10H10.3	dhs-8	Dehydrogenases	unclear	NA
lipid_metabolism_wormbase	Y32H12A.3	dhs-9	Dehydrogenases	unclear	NA
lipid_metabolism_wormbase	C25G4.2		Phospholipase/carboxyhydrolase	unclear	NA
lipid_metabolism_wormbase	D1054.1		Patatin-Like phospholipase	unclear	NA
lipid_metabolism_wormbase	F38E9.1		Phosphatidylinositol-Specific phospholipase C	unclear	NA
lipid_metabolism_wormbase	F42G9.6		triacylglycerol lipase	unclear	NA
lipid_metabolism_wormbase	H41C03.2		triacylglycerol lipase	unclear	NA
lipid_metabolism_wormbase	Y37E11AR.4	nape-1	N-Acyl Phosphatidyl Ethanolamine specific phospholipase D	unclear	NA
lipid_metabolism_wormbase	Y37E11AR.3	nape-2	N-Acyl Phosphatidyl Ethanolamine specific phospholipase D	unclear	NA
lipid_metabolism_wormbase	F27C8.6	trcs-1	lipase	unclear	NA
lipid_metabolism_wormbase	Y73B6BL.4		Calcium-Independent phospholipase A2	unclear	NA
lipid_metabolism_wormbase	Y49E10.11	tat-1	flippase	unclear	NA
lipid_metabolism_wormbase	H06H21.10	tat-2	flippase	unclear	NA
lipid_metabolism_wormbase	W09D10.2	tat-3	flippase	unclear	NA
lipid_metabolism_wormbase	T24H7.5	tat-4	flippase	unclear	NA
lipid_metabolism_wormbase	F36H2.1	tat-5	flippase	unclear	NA
lipid_metabolism_wormbase	F02C9.3	tat-6	flippase	unclear	NA
lipid_metabolism_wormbase	T22H6.2	alh-13	aldehyde dehydrogenase	unclear	NA
